# Supplementary material for: LED-induced Ru-photoredox Pd-catalyzed C–H arylation of (6-phenylpyridin-2-yl)pyrimidines and heteroaryl counterparts
Source: Royal Society of Chemistry journal article supplement (doi:10.1039/d4ra02173h), 2024-01-01
Supplement: d4ra02173h1.pdf [file d4ra02173h1.pdf]

## Electronic Supplementary Information

### LED-Induced Ru-Photoredox Pd-Catalyzed C-H Arylation of (6-Phenylpyridin-2-yl)pyrimidines and Heteroaryl Counterparts

Ioakeim M. Antoniou, Natalia Ioannou, Nikos Panagiotou, Savvas N. Georgiades\*

Department of Chemistry, University of Cyprus, 1 Panepistimiou Avenue, Aglandjia,  
2109 Nicosia, Cyprus

Ph.: (+357)-22892779; E-mail: [georgiades.savvas@ucy.ac.cy](mailto:georgiades.savvas@ucy.ac.cy)  
(corresponding author)

#### CONTENTS

|                                                                             |       |
|-----------------------------------------------------------------------------|-------|
| I. Supplementary Synthetic Methods and Characterization Data                | S-2   |
| II. <sup>1</sup> H and <sup>13</sup> C NMR Spectra of Synthesized Compounds | S-35  |
| III. Crystal Structures and Single-Crystal X-Ray Diffraction Data           | S-121 |

## I. Supplementary Synthetic Methods and Characterization Data

### • 3-Oxo-*N*-phenylbutanamide (**3**):

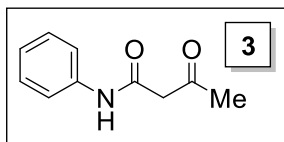

Synthesis method: A round-bottom flask was charged with aniline (1.8 mL, 20 mmol, 1 equiv.) and ethyl acetoacetate (3.8 mL, 30 mmol, 1.5 equiv.). A vertical condenser was fitted to the flask and the mixture was heated at 160 °C for 3 h. After cooling down to room temperature, the mixture was dissolved in ethyl acetate and washed with HCl 0.1 M (3 times) and water. The combined organic layer was dried over Na<sub>2</sub>SO<sub>4</sub>. After filtering out the drying agent, the solution was concentrated under vacuum. The sample was applied to a silica column for flash chromatography. Elution took place with hexane-ethyl acetate step gradient (from 3:1 to 1:1), to afford 1.72 g (9.7 mmol, 49%) of compound **3**, as a white solid. <sup>1</sup>H NMR (CDCl<sub>3</sub>): δ<sub>H</sub> (ppm) 2.33 (s, 3H), 3.59 (s, 2H), 7.12 (t, 1H, J=7.3 Hz), 7.33 (app. t, 2H, J=7.7 Hz), 7.55 (d, 2H, J=8.1 Hz), 9.11 (bs, 1H). <sup>13</sup>C NMR (CDCl<sub>3</sub>): δ<sub>C</sub> (ppm) 31.32, 49.61, 120.14, 124.56, 128.98, 137.45, 163.31, 205.32. FT-IR: wavenumber (cm<sup>-1</sup>) 1711 (m), 1659 (s), 1597 (s), 1539 (s), 1503 (m), 1445 (s), 1408 (m), 1315 (m), 1163 (s), 1005 (m), 752 (s). MS (ES-API), m/z: calcd for C<sub>10</sub>H<sub>11</sub>NO<sub>2</sub>: 177.08; found: 178.1 [M+H<sup>+</sup>]. m.p. 82-83 °C.

### • 4-(6-Bromopyridin-2-yl)-6-methyl-2-oxo-*N*-phenyl-1,2,3,4-tetrahydropyrimidine-5-carboxamide (**5**):

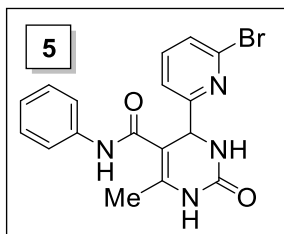

Pale yellow solid. Yield: 95%. <sup>1</sup>H NMR (DMSO-d<sub>6</sub>): δ<sub>H</sub> (ppm) 2.03 (s, 3H), 5.35 (d, 1H, J=3.0 Hz), 7.01 (t, 1H, J=7.4 Hz), 7.26 (app. t, 2H, J=7.9 Hz), 7.31 (d, 1H, J=7.7 Hz), 7.55 (d, 1H, J=7.9 Hz), 7.57 (d, 2H, J=8.4 Hz), 7.70 (dd, 1H, J<sub>1</sub>=3.0 Hz, J<sub>2</sub>=1.6 Hz), 7.77 (app. t, 1H, J=7.8 Hz), 8.87 (d, 1H, J=1.6 Hz), 9.78 (s, 1H). <sup>13</sup>C NMR (DMSO-d<sub>6</sub>): δ<sub>C</sub> (ppm) 17.23, 55.94, 103.91, 119.65, 119.71, 123.09, 126.88, 128.53, 139.26, 140.49, 140.60, 140.83, 152.79, 163.97, 165.02. FT-IR: wavenumber (cm<sup>-1</sup>) 1697 (m), 1663 (m), 1593 (m), 1555 (m), 1500 (m), 1441 (m), 1327 (m), 1252 (m), 1211 (m), 1011 (m), 748 (s). MS (ES-API), m/z: calcd for C<sub>17</sub>H<sub>15</sub>BrN<sub>4</sub>O<sub>2</sub>: 386.04; found: 387.0 [M+H<sup>+</sup>]. m.p. 233-235 °C.

### • Ethyl 4-(6-bromopyridin-2-yl)-6-methyl-2-oxo-1,2,3,4-tetrahydropyrimidine-5-carboxylate (**6**):

White solid. Yield: 68%. <sup>1</sup>H NMR (DMSO-d<sub>6</sub>): δ<sub>H</sub> (ppm) 1.09 (t, 3H, J=7.1 Hz), 2.23 (s, 3H), 3.99 (q, 2H, J=7.1 Hz), 5.18 (d, 1H, J=3.2 Hz), 7.28 (d, 1H, J=7.4 Hz), 7.52 (d, 1H, J=7.8 Hz), 7.71 (m, 2H, signals overlapping), 9.22 (s, 1H). <sup>13</sup>C NMR (DMSO-d<sub>6</sub>): δ<sub>C</sub> (ppm) 14.05, 17.82, 55.28, 59.16, 97.38, 120.25, 126.87, 140.14, 140.92, 149.35, 151.96,

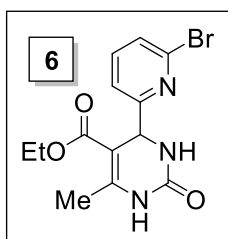

164.03, 165.14. FT-IR: wavenumber ( $\text{cm}^{-1}$ ) 2360 (s), 2341(m), 1702 (w), 1650 (s), 1596 (w), 1577 (w), 1448 (w), 1320 (m), 1277 (s), 945 (m), 936 (m), 919 (m), 813 (w), 766 (m), 704 (s), 695 (s), 670 (w), 638 (s). MS (ES-API), m/z: calcd for  $\text{C}_{13}\text{H}_{14}\text{BrN}_3\text{O}_3$ : 339.02; found: 340.0  $[\text{M}+\text{H}^+]$ . m.p. 157-159 °C.

• **4-(6-Bromopyridin-2-yl)-2-hydroxy-6-methyl-N-phenylpyrimidine-5-carboxamide (7):**

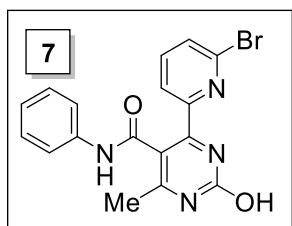

White solid. Yield: 80%.  $^1\text{H}$  NMR ( $\text{DMSO-d}_6$ ):  $\delta_{\text{H}}$  (ppm) 2.36 (s, 3H), 7.04 (tt, 1H,  $J_1=7.4$  Hz,  $J_2=1.0$  Hz), 7.28 (app. t, 2H,  $J=7.8$  Hz), 7.54 (dd, 2H,  $J_1=8.2$  Hz,  $J_2=1.0$  Hz), 7.69 (dd, 1H,  $J_1=7.9$  Hz,  $J_2=0.7$  Hz), 7.89 (app. t, 1H,  $J=7.8$  Hz), 8.07 (d, 1H,  $J=7.7$  Hz), 10.17 (bs, 1H).  $^{13}\text{C}$  NMR ( $\text{DMSO-d}_6$ ):  $\delta_{\text{C}}$  (ppm) 17.74, 114.34, 119.76, 122.72, 123.36, 128.44, 129.70, 138.97, 139.53, 140.33, 155.22, 156.43, 159.54, 163.70, 165.70. FT-IR: wavenumber ( $\text{cm}^{-1}$ ) 2750 (br), 1649 (s), 1661 (m), 1537 (m), 1456 (m), 1315 (m), 1130 (m), 789 (s), 746 (s), 723 (s). MS (ES-API), m/z: calcd for  $\text{C}_{17}\text{H}_{13}\text{BrN}_4\text{O}_2$ : 384.02; found: 385.0  $[\text{M}+\text{H}^+]$ . m.p. > 250 °C.

• **Ethyl 4-(6-bromopyridin-2-yl)-2-hydroxy-6-methylpyrimidine-5-carboxylate (8):**

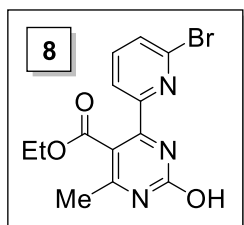

Pale yellow solid. Yield: 53%.  $^1\text{H}$  NMR ( $\text{CDCl}_3$ ):  $\delta_{\text{H}}$  (ppm) 1.22 (t, 3H,  $J=7.2$  Hz), 2.60 (s, 3H), 4.37 (q, 2H,  $J=7.2$  Hz), 7.59 (d, 1H,  $J=7.9$  Hz), 7.71 (app. t, 1H,  $J=7.8$  Hz), 8.30 (d, 1H,  $J=7.7$  Hz).  $^{13}\text{C}$  NMR ( $\text{CDCl}_3$ ):  $\delta_{\text{C}}$  (ppm) 13.91, 17.90, 62.00, 112.05, 122.83, 130.32, 139.30, 140.19, 154.27, 158.55, 159.70, 165.85, 168.15. FT-IR: wavenumber ( $\text{cm}^{-1}$ ) 2360 (s), 2343 (m), 1652 (s), 1596 (m), 1577 (w), 1543 (w), 1448 (m), 1321 (m), 1279 (s), 945 (m), 919 (m), 814 (w), 766 (m), 704 (s), 695 (s), 670 (w), 638 (s). MS (ES-API), m/z: calcd for  $\text{C}_{13}\text{H}_{12}\text{BrN}_3\text{O}_3$ : 337.01; found: 338.1  $[\text{M}+\text{H}^+]$ . m.p. 164-166 °C.

• **4-(6-Bromopyridin-2-yl)-6-methyl-5-(phenylcarbamoyl)pyrimidin-2-yl trifluoromethanesulfonate (9):**

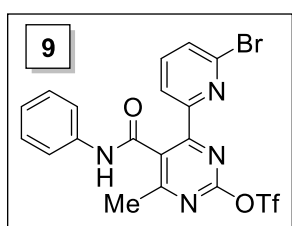

White solid. Yield: 57%.  $^1\text{H}$  NMR ( $\text{CDCl}_3$ ):  $\delta_{\text{H}}$  (ppm) 2.73 (s, 3H), 7.19 (t, 1H,  $J=7.4$  Hz), 7.39 (app. t, 2H,  $J=7.7$  Hz), 7.55 (d, 1H,  $J=7.9$  Hz), 7.64 (d, 2H,  $J=8.0$  Hz), 7.72 (app. t, 1H, 7.8 Hz), 7.77 (bs, 1H), 8.27 (d, 1H,  $J=7.7$  Hz).  $^{13}\text{C}$  NMR ( $\text{CDCl}_3$ ):  $\delta_{\text{C}}$  (ppm) 22.40, 118.50 ( $\text{CF}_3$ , q,  $J=320.8$  Hz), 120.54, 122.70, 125.11, 128.11, 129.01, 130.88, 137.28, 139.60, 141.11, 152.63, 156.90, 161.05, 163.75, 172.63. FT-IR: wavenumber ( $\text{cm}^{-1}$ ) 1655 (s), 1543 (s), 1408 (s),

1204 (s), 1144 (s), 1121 (s), 997 (s), 826 (m), 804 (m), 754 (m). MS (ES-API), m/z: calcd for C<sub>18</sub>H<sub>12</sub>BrF<sub>3</sub>N<sub>4</sub>O<sub>4</sub>S: 515.97; found: 517.0 [M+H<sup>+</sup>]. m.p. 160-162 °C.

• **Ethyl 4-(6-bromopyridin-2-yl)-6-methyl-2-(((trifluoromethyl)sulfonyl)oxy)pyrimidine-5-carboxylate (10):**

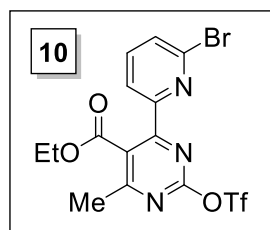

Beige solid. Yield: 54%. <sup>1</sup>H NMR (CDCl<sub>3</sub>): δ<sub>H</sub> (ppm) 1.38 (t, 3H, J=7.1 Hz), 2.66 (s, 3H), 4.58 (q, 2H, J=7.1 Hz), 7.62 (d, 1H, J=7.9 Hz), 7.76 (app. t, 1H, J=7.8 Hz), 8.35 (d, 1H, J=7.7 Hz). <sup>13</sup>C NMR (CDCl<sub>3</sub>): δ<sub>C</sub> (ppm) 13.83, 22.19, 62.55, 118.48 (CF<sub>3</sub>, q, J=320.9 Hz), 122.40, 125.37, 130.83, 139.70, 140.61, 152.16, 156.87, 161.01, 166.12, 171.67. FT-IR: wavenumber (cm<sup>-1</sup>) 1736 (s), 1566 (m), 1539 (m), 1422 (s), 1267 (m), 1207 (s), 1124 (s), 1084 (m), 988 (s), 868 (m), 820 (s), 789 (m). MS (ES-API), m/z: calcd for C<sub>14</sub>H<sub>11</sub>BrF<sub>3</sub>N<sub>3</sub>O<sub>5</sub>S: 468.96; found: 469.1 [M]. m.p. 89-91 °C.

• **4-(6-Bromopyridin-2-yl)-2-methoxy-6-methyl-N-phenylpyrimidine-5-carboxamide (11):**

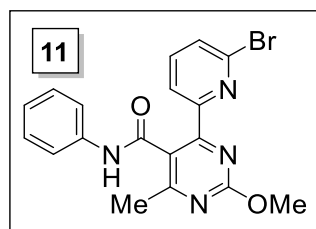

White solid. Yield: 70%. <sup>1</sup>H NMR (CDCl<sub>3</sub>): δ<sub>H</sub> (ppm) 2.58 (s, 3H), 4.04 (s, 3H), 7.15 (t, 1H, J=7.5 Hz), 7.36 (app. t, 2H, J=7.8 Hz), 7.45 (d, 1H, J=7.9 Hz), 7.61 (app. t, 1H, J=7.8 Hz), 7.66 (d, 2H, J=8.1 Hz), 7.99 (bs, 1H), 8.18 (d, 1H, J=7.7 Hz). <sup>13</sup>C NMR (CDCl<sub>3</sub>): δ<sub>C</sub> (ppm) 22.32, 55.07, 120.43, 121.98, 123.09, 124.52, 128.84, 129.73, 137.89, 139.09, 140.69, 154.55, 159.67, 164.09, 165.63, 169.75. FT-IR: wavenumber (cm<sup>-1</sup>) 1657 (s), 1541 (s), 1408 (s), 1202 (s), 1142 (s), 1123 (s), 997 (s), 824 (m), 806 (m), 754 (m). MS (ES-API), m/z: calcd for C<sub>18</sub>H<sub>15</sub>BrN<sub>4</sub>O<sub>2</sub>: 398.04; found: 399.0 [M+H<sup>+</sup>]. m.p. 163-165 °C.

• **Ethyl 4-(6-bromopyridin-2-yl)-2-methoxy-6-methylpyrimidine-5-carboxylate (12):**

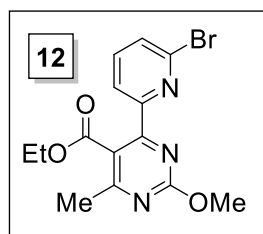

White solid. Yield: 76%. <sup>1</sup>H NMR (CDCl<sub>3</sub>): δ<sub>H</sub> (ppm) 1.33 (t, 3H, J=7.2 Hz), 2.57 (s, 3H), 4.09 (s, 3H), 4.49 (q, 2H, J=7.2 Hz), 7.55 (dd, 1H, J<sub>1</sub>=7.9 Hz, J<sub>2</sub>=0.7 Hz), 7.70 (app. t, 1H, J=7.8 Hz), 8.33 (dd, 1H, J<sub>1</sub>=7.7 Hz, J<sub>2</sub>=0.7 Hz). <sup>13</sup>C NMR (CDCl<sub>3</sub>): δ<sub>C</sub> (ppm) 14.00, 22.36, 55.11, 61.93, 120.07, 121.80, 129.71, 139.25, 140.39, 154.52, 160.20, 164.33, 168.09, 169.23. FT-IR: wavenumber (cm<sup>-1</sup>) 2359 (m), 1732 (m), 1650 (m), 1550 (s), 1472 (m), 1448 (m), 1381 (m), 1321 (m), 1276 (s), 1125 (m), 1075 (m), 938 (m), 919 (m), 794 (m), 765 (m), 703 (s), 695 (s), 638 (s). MS (ES-API), m/z: calcd for C<sub>14</sub>H<sub>14</sub>BrN<sub>3</sub>O<sub>3</sub>: 351.02; found: 352.1 [M+H<sup>+</sup>]. m.p. 92-94 °C.

• **2-Methoxy-4-methyl-N-phenyl-6-(6-phenylpyridin-2-yl)pyrimidine-5-carboxamide (14a):**

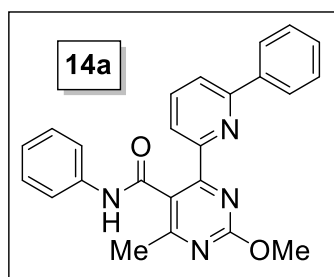

White solid. Yield: 99%.  $^1\text{H}$  NMR ( $\text{CDCl}_3$ ):  $\delta_{\text{H}}$  (ppm) 2.65 (s, 3H), 4.09 (s, 3H), 7.06-7.12 (m, 3H, 2 signals overlapping), 7.20-7.26 (m, 3H, 2 signals overlapping), 7.51 (d, 2H,  $J=8.1$  Hz), 7.76 (d, 1H,  $J=7.9$  Hz), 7.82-7.86 (m, 3H, 2 signals overlapping), 7.87 (app. t, 1H,  $J=7.8$  Hz), 8.27 (d, 1H,  $J=7.7$  Hz).  $^{13}\text{C}$  NMR ( $\text{CDCl}_3$ ):  $\delta_{\text{C}}$  (ppm) 22.37, 54.95, 119.67, 121.71, 121.87, 122.77, 124.15, 127.23, 128.35, 128.90, 128.98, 137.74, 137.96, 138.46, 153.50, 156.88, 161.37, 164.17, 166.39, 169.73. FT-IR: wavenumber ( $\text{cm}^{-1}$ ) 1643 (m), 1598 (w), 1545 (s), 1470 (m), 1441 (m), 1375 (m), 1317 (s), 1275 (w), 1024 (w), 799 (m), 758 (s), 698 (m). MS (ES-API),  $m/z$ : calcd for  $\text{C}_{24}\text{H}_{20}\text{N}_4\text{O}_2$ : 396.16; found: 397.1  $[\text{M}+\text{H}^+]$ . m.p. 191-193  $^{\circ}\text{C}$ .

• **2-Methoxy-4-methyl-N-phenyl-6-(6-(*o*-tolyl)pyridin-2-yl)pyrimidine-5-carboxamide (14b):**

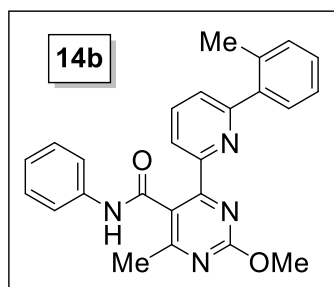

White solid. Yield: 96%.  $^1\text{H}$  NMR ( $\text{CDCl}_3$ ):  $\delta_{\text{H}}$  (ppm) 2.21 (s, 3H), 2.61 (s, 3H), 4.10 (s, 3H), 6.92 (app. t, 1H,  $J=7.7$  Hz), 7.01 (t, 1H,  $J=7.3$  Hz), 7.07-7.13 (m, 3H, 2 signals overlapping), 7.17 (d, 2H,  $J=8.1$  Hz), 7.20-7.26 (m, 2H, 2 signals overlapping), 7.44 (d, 1H,  $J=7.9$  Hz), 7.87 (app. t, 1H,  $J=7.8$  Hz), 7.93 (bs, 1H), 8.20 (d, 1H,  $J=7.7$  Hz).  $^{13}\text{C}$  NMR ( $\text{CDCl}_3$ ):  $\delta_{\text{C}}$  (ppm) 20.14, 22.51, 55.03, 119.79, 121.59, 123.24, 124.06, 125.61, 125.69, 128.35, 128.70, 130.02, 130.45, 135.53, 137.22, 137.77, 139.35, 153.76, 158.92, 161.74, 164.27, 165.92, 169.87. FT-IR: wavenumber ( $\text{cm}^{-1}$ ) 1657 (w), 1557 (s), 1445 (w), 1380 (w), 1323 (m), 750 (m), 746 (w). MS (ES-API),  $m/z$ : calcd for  $\text{C}_{25}\text{H}_{22}\text{N}_4\text{O}_2$ : 410.17; found: 411.1  $[\text{M}+\text{H}^+]$ . m.p. 168-170  $^{\circ}\text{C}$ .

• **2-Methoxy-4-methyl-N-phenyl-6-(6-(*m*-tolyl)pyridin-2-yl)pyrimidine-5-carboxamide (14c):**

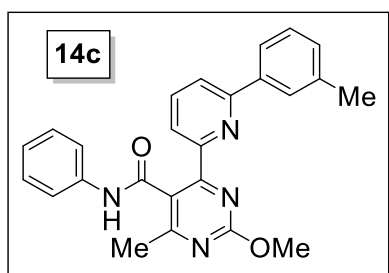

White solid. Yield: 98%.  $^1\text{H}$  NMR ( $\text{CDCl}_3$ ):  $\delta_{\text{H}}$  (ppm) 2.15 (s, 3H), 2.51 (s, 3H), 3.97 (s, 3H), 6.91 (app. t, 1H,  $J=7.5$  Hz), 7.02-7.08 (m, 2H, 2 signals overlapping), 7.19 (app. t, 2H,  $J=7.6$  Hz), 7.48 (d, 2H,  $J=7.9$  Hz), 7.62 (d, 1H,  $J=8.1$  Hz), 7.64 (bs, 1H), 7.69 (d, 1H,  $J=7.9$  Hz), 7.74 (app. t, 1H,  $J=7.8$  Hz), 8.13 (d, 1H,  $J=7.7$  Hz), 8.28 (bs, 1H).  $^{13}\text{C}$  NMR ( $\text{CDCl}_3$ ):  $\delta_{\text{C}}$  (ppm) 21.14, 22.32, 54.87, 119.86, 121.56, 121.87, 122.86, 124.10, 124.51, 127.74, 128.25, 128.78, 129.76,

137.54, 138.05, 138.07, 138.37, 153.37, 157.03, 161.34, 164.03, 166.38, 169.72. FT-IR: wavenumber (cm<sup>-1</sup>) 1651 (m), 1597 (m), 1553 (s), 1468 (m), 1441 (m), 1381 (m), 1317 (s), 1254 (m), 1024 (w), 785 (m), 754 (m). MS (ES-API), m/z: calcd for C<sub>25</sub>H<sub>22</sub>N<sub>4</sub>O<sub>2</sub>: 410.17; found: 411.1 [M+H<sup>+</sup>]. m.p. 82-84 °C.

• **4-(6-([1,1'-Biphenyl]-4-yl)pyridin-2-yl)-2-methoxy-6-methyl-N-phenylpyrimidine-5-carboxamide (14d):**

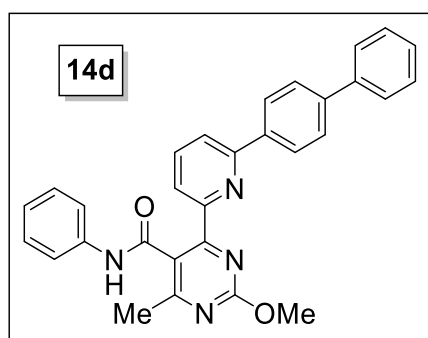

White solid. Yield: 96%. <sup>1</sup>H NMR (CDCl<sub>3</sub>): δ<sub>H</sub> (ppm) 2.59 (s, 3H), 4.04 (s, 3H), 7.08 (t, 1H, J=7.4 Hz), 7.20-7.26 (m, 4H, 2 signals overlapping), 7.36 (t, 1H, J=7.2 Hz), 7.44 (app. t, 2H, J=7.5 Hz), 7.50 (d, 2H, J=7.8 Hz), 7.55 (d, 2H, J=7.8 Hz), 7.72 (d, 1H, J=7.9 Hz), 7.78 (app. t, 1H, J=7.8 Hz), 7.86 (d, 2H, J=8.1 Hz), 8.09 (bs, 1H), 8.23 (d, 1H, J=7.7 Hz). <sup>13</sup>C NMR (CDCl<sub>3</sub>): δ<sub>C</sub> (ppm) 22.34, 54.93, 119.82,

121.58, 121.71, 122.69, 124.08, 126.89, 126.91, 127.39, 127.64, 128.73, 128.89, 136.91, 137.64, 138.59, 140.49, 141.44, 153.42, 156.46, 161.18, 164.16, 166.56, 169.69. FT-IR: wavenumber (cm<sup>-1</sup>) 1651 (m), 1598 (w), 1549 (s), 1472 (m), 1439 (m), 1385 (m), 1317 (s), 1261 (m), 1057 (m), 766 (s). MS (ES-API), m/z: calcd for C<sub>30</sub>H<sub>24</sub>N<sub>4</sub>O<sub>2</sub>: 472.19; found: 473.1 [M+H<sup>+</sup>]. m.p. 234-236 °C.

• **4-(6-(2-Butoxyphenyl)pyridin-2-yl)-2-methoxy-6-methyl-N-phenylpyrimidine-5-carboxamide (14e):**

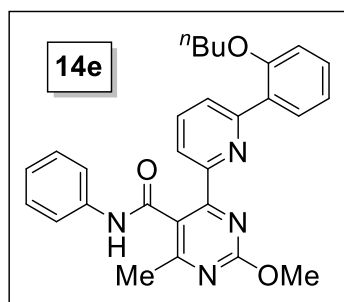

White solid. Yield: 98%. <sup>1</sup>H NMR (CDCl<sub>3</sub>): δ<sub>H</sub> (ppm) 0.90 (t, 3H, J=7.4 Hz), 1.39 (app. sextet, 2H, J=7.5 Hz), 1.68 (app. quint., 2H, J=7.0 Hz), 2.60 (s, 3H), 3.91 (t, 2H, J=6.4 Hz), 4.05 (s, 3H), 6.44 (app. t, 1H, J=7.5 Hz), 6.85 (d, 1H, J=8.2 Hz), 7.05 (t, 1H, J=7.4 Hz), 7.16 (dt, 1H, J<sub>1</sub>=7.7 Hz, J<sub>2</sub>=1.7 Hz), 7.20 (app. t, 2H, J=7.7 Hz), 7.41 (d, 2H, J=8.0 Hz), 7.67 (dd, 1H, J<sub>1</sub>=8.0 Hz, J<sub>2</sub>=1.7 Hz), 7.79 (app. t, 1H, J=7.8 Hz),

7.98 (dd, 1H, J<sub>1</sub>=7.8 Hz, J<sub>2</sub>=0.8 Hz), 8.00 (bs, 1H), 8.17 (dd, 1H, J<sub>1</sub>=7.8 Hz, J<sub>2</sub>=0.8 Hz). <sup>13</sup>C NMR (CDCl<sub>3</sub>): δ<sub>C</sub> (ppm) 13.76, 19.29, 22.45, 31.27, 54.93, 68.08, 111.91, 119.66, 120.74, 121.33, 122.91, 124.00, 126.86, 127.77, 128.79, 129.91, 132.08, 136.37, 138.35, 153.44, 155.33, 156.34, 161.93, 164.20, 166.31, 169.70. FT-IR: wavenumber (cm<sup>-1</sup>) 2926 (m), 1651 (m), 1601 (m), 1555 (s), 1466 (m), 1441 (s), 1380 (m), 1319 (s), 1263 (m), 1069 (m), 797 (m), 758 (s). MS (ES-API), m/z: calcd for C<sub>28</sub>H<sub>28</sub>N<sub>4</sub>O<sub>3</sub>: 468.22; found: 469.1 [M+H<sup>+</sup>]. m.p. 118-120 °C.

• **2-Methoxy-4-(6-(2-methoxyphenyl)pyridin-2-yl)-6-methyl-N-phenylpyrimidine-5-carboxamide (14f):**

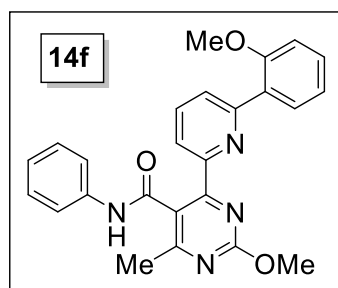

White solid. Yield: 99%.  $^1\text{H}$  NMR ( $\text{CDCl}_3$ ):  $\delta_{\text{H}}$  (ppm) 2.57 (s, 3H), 3.75 (s, 3H), 4.03 (s, 3H), 6.46 (app. t, 1H,  $J=7.6$  Hz), 6.85 (d, 1H,  $J=8.3$  Hz), 7.05 (t, 1H,  $J=7.4$  Hz), 7.15-7.21 (m, 3H, 2 signals overlapping), 7.40 (d, 2H,  $J=8.0$  Hz), 7.66 (dd, 1H,  $J_1=7.6$  Hz,  $J_2=1.8$  Hz), 7.76 (app. t, 1H,  $J=7.8$  Hz), 7.92 (d, 1H,  $J=7.9$  Hz), 8.05 (bs, 1H), 8.17 (d, 1H,  $J=7.7$  Hz).  $^{13}\text{C}$  NMR ( $\text{CDCl}_3$ ):  $\delta_{\text{C}}$  (ppm) 22.39, 54.89, 55.40, 110.89, 119.71, 120.89, 121.33, 122.87, 123.94, 126.75, 127.74, 128.75, 129.88, 132.09, 136.49, 138.36, 153.43, 155.21, 156.76, 161.77, 164.16, 166.33, 169.67. FT-IR: wavenumber ( $\text{cm}^{-1}$ ) 1651 (m), 1597 (m), 1549 (s), 1468 (m), 1466 (m), 1379 (m), 1317 (s), 1260 (s), 1024 (m), 752 (s). MS (ES-API),  $m/z$ : calcd for  $\text{C}_{25}\text{H}_{22}\text{N}_4\text{O}_3$ : 426.17; found: 427.1 [ $\text{M}+\text{H}^+$ ]. m.p. 79-81  $^{\circ}\text{C}$ .

• **2-Methoxy-4-(6-(4-methoxyphenyl)pyridin-2-yl)-6-methyl-N-phenylpyrimidine-5-carboxamide (14g):**

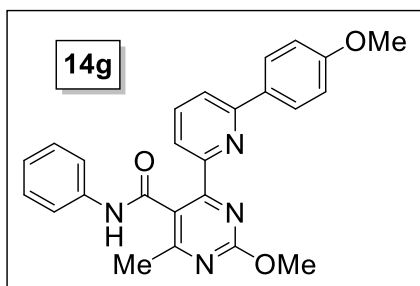

White solid. Yield: 99%.  $^1\text{H}$  NMR ( $\text{CDCl}_3$ ):  $\delta_{\text{H}}$  (ppm) 2.64 (s, 3H), 3.75 (s, 3H), 4.09 (s, 3H), 6.59 (d, 2H,  $J=8.6$  Hz), 7.09 (t, 1H,  $J=7.5$  Hz), 7.27 (app. t, 2H,  $J=7.8$  Hz), 7.55 (d, 2H,  $J=8.1$  Hz), 7.70 (d, 1H,  $J=7.9$  Hz), 7.80 (d, 2H,  $J=8.6$  Hz), 7.84 (app. t, 1H,  $J=7.8$  Hz), 8.06 (bs, 1H), 8.19 (d, 1H,  $J=7.7$  Hz).  $^{13}\text{C}$  NMR ( $\text{CDCl}_3$ ):  $\delta_{\text{C}}$  (ppm) 22.43, 55.05, 55.23, 113.84, 119.79, 121.26, 121.47, 122.96, 124.18, 128.84, 128.93, 129.97, 138.30, 138.47, 153.06, 156.44, 160.75, 161.10, 164.30, 166.31, 169.77. FT-IR: wavenumber ( $\text{cm}^{-1}$ ) 1661 (m), 1599 (m), 1553 (s), 1441 (m), 1379 (m), 1323 (m), 1248 (m), 1179 (m), 1030 (m), 793 (s), 754 (s). MS (ES-API),  $m/z$ : calcd for  $\text{C}_{25}\text{H}_{22}\text{N}_4\text{O}_3$ : 426.17; found: 427.1 [ $\text{M}+\text{H}^+$ ]. m.p. 91-93  $^{\circ}\text{C}$ .

• **4-(6-(3,5-Dimethoxyphenyl)pyridin-2-yl)-2-methoxy-6-methyl-N-phenylpyrimidine-5-carboxamide (14h):**

White solid. Yield: 98%.  $^1\text{H}$  NMR ( $\text{CDCl}_3$ ):  $\delta_{\text{H}}$  (ppm) 2.67 (s, 3H), 3.76 (s, 6H), 4.10 (s, 3H), 6.40 (t, 1H,  $J=2.1$  Hz), 7.01 (t, 1H,  $J=7.3$  Hz), 7.05 (d, 2H,  $J=2.1$  Hz), 7.12 (app. t, 2H,  $J=7.6$  Hz), 7.23 (d, 2H,  $J=7.9$  Hz), 7.59 (bs, 1H), 7.74 (d, 1H,  $J=7.9$  Hz), 7.89 (app. t, 1H,  $J=7.8$  Hz), 8.26 (d, 1H,  $J=7.7$  Hz).  $^{13}\text{C}$  NMR ( $\text{CDCl}_3$ ):  $\delta_{\text{C}}$  (ppm) 22.44, 55.06, 55.51, 101.76, 105.49, 121.15, 122.03, 122.25, 122.70, 124.74, 128.59, 137.28, 138.06, 140.07, 153.38, 156.86, 160.89, 161.21, 164.31, 166.48, 170.22. FT-IR: wavenumber ( $\text{cm}^{-1}$ )

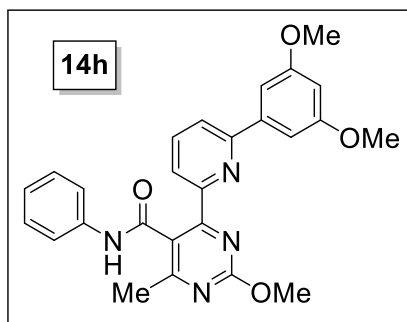

1655 (m), 1595 (m), 1549 (s), 1462 (s), 1379 (m), 1319 (s), 1207 (m), 1155 (s), 1065 (m), 793 (s), 756 (m). MS (ES-API), m/z: calcd for C<sub>26</sub>H<sub>24</sub>N<sub>4</sub>O<sub>4</sub>: 456.18; found: 457.1 [M+H<sup>+</sup>]. m.p. 103-105 °C.

• **2-Methoxy-4-methyl-N-phenyl-6-(6-(4-(trifluoromethyl)phenyl)pyridin-2-yl)pyrimidine-5-carboxamide (14i):**

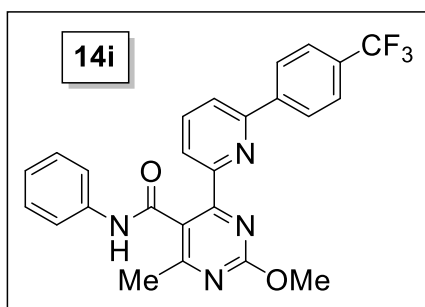

White solid. Yield: 96%. <sup>1</sup>H NMR (CDCl<sub>3</sub>): δ<sub>H</sub> (ppm) 2.59 (s, 3H), 4.06 (s, 3H), 7.09 (t, 1H, J=7.5 Hz), 7.19 (d, 2H, J=8.2 Hz), 7.23 (app. t, 2H, J=7.7 Hz), 7.45 (d, 2H, J=7.9 Hz), 7.71 (d, 1H, J=7.6 Hz), 7.79-7.89 (m, 2H, 2 signals overlapping), 7.97 (bs, 1H), 8.33 (d, 1H, J=7.8 Hz). <sup>13</sup>C NMR (CDCl<sub>3</sub>): δ<sub>C</sub> (ppm) 22.28, 55.01, 119.68, 122.22, 122.31, 122.60, 124.46, 125.17 (q, J=3.7 Hz), 127.50, 128.91, 130.57 (q, J=32.4 Hz), 134.09, 137.96, 138.30, 141.25, 153.57, 155.47, 160.71, 164.21, 166.63, 169.75. FT-IR: wavenumber (cm<sup>-1</sup>) 1553 (s), 1443 (m), 1323 (s), 1255 (m), 1157 (m), 1109 (s), 1074 (m), 1015 (m), 794 (w), 760 (w), 740 (w). MS (ES-API), m/z: calcd for C<sub>25</sub>H<sub>19</sub>F<sub>3</sub>N<sub>4</sub>O<sub>2</sub>: 464.15; found: 465.0 [M+H<sup>+</sup>]. m.p. 108-110 °C.

• **4-(6-(2-Fluorophenyl)pyridin-2-yl)-2-methoxy-6-methyl-N-phenylpyrimidine-5-carboxamide (14j):**

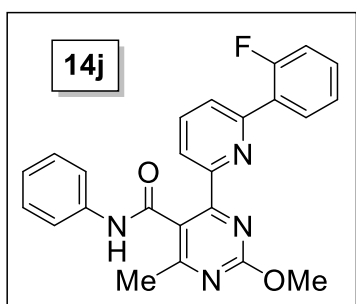

White solid. Yield: 99%. <sup>1</sup>H NMR (CDCl<sub>3</sub>): δ<sub>H</sub> (ppm) 2.61 (s, 3H), 4.07 (s, 3H), 6.58 (app. t, 1H, J=7.5 Hz), 6.99 (dd, 1H, J<sub>1</sub>=11.6 Hz, J<sub>2</sub>=8.3 Hz), 7.07 (t, 1H, J=7.4 Hz), 7.16 (m, 1H), 7.22 (app. t, 2H, J=7.6 Hz), 7.46 (d, 2H, J=7.8 Hz), 7.78-7.80 (m, 4H, 4 signals overlapping), 8.28 (dd, 1H, J<sub>1</sub>=5.1 Hz, J<sub>2</sub>=3.5 Hz). <sup>13</sup>C NMR (CDCl<sub>3</sub>): δ<sub>C</sub> (ppm) 22.33, 55.00, 115.56 (d, J=22.8 Hz), 119.66, 121.98, 122.77, 124.18, 124.25 (d, J=3.6 Hz), 125.97, 126.10 (d, J=11.3 Hz), 128.88, 130.40 (d, J=8.7 Hz), 131.98 (d, J=2.7 Hz), 137.45, 138.35, 152.73 (d, J=2.7 Hz), 153.58 Hz, 160.33 (d, J=249.3 Hz), 161.24, 164.24, 166.38, 169.72. FT-IR: wavenumber (cm<sup>-1</sup>) 1643 (m), 1543 (s), 1441 (m), 1317 (m), 1273 (w), 1209 (w), 1167 (w), 758 (s). MS (ES-API), m/z: calcd for C<sub>24</sub>H<sub>19</sub>FN<sub>4</sub>O<sub>2</sub>: 414.15; found: 415.1 [M+H<sup>+</sup>]. m.p. 202-204 °C.



• **4-(6-(3-Fluorophenyl)pyridin-2-yl)-2-methoxy-6-methyl-N-phenylpyrimidine-5-carboxamide (14k):**

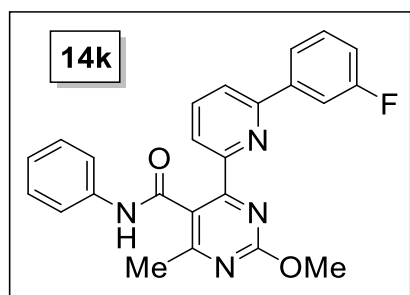

White solid. Yield: 98%.  $^1\text{H}$  NMR ( $\text{CDCl}_3$ ):  $\delta_{\text{H}}$  (ppm) 2.49 (s, 3H), 3.96 (s, 3H), 6.85-6.89 (m, 2H, 2 signals overlapping), 7.05 (t, 1H,  $J=7.5$  Hz), 7.20 (app. t, 2H,  $J=7.8$  Hz), 7.48 (m, 1H), 7.51 (d, 2H,  $J=8.1$  Hz), 7.57 (m, 1H), 7.62 (d, 1H,  $J=7.9$  Hz), 7.75 (app. t, 1H,  $J=7.8$  Hz), 8.17 (d, 1H,  $J=7.7$  Hz), 8.35 (bs, 1H).  $^{13}\text{C}$  NMR ( $\text{CDCl}_3$ ):  $\delta_{\text{C}}$  (ppm) 22.27, 54.98, 113.88 (d,  $J=22.8$  Hz), 115.82 (d,  $J=21.1$  Hz), 119.62, 121.90, 122.17, 122.74, 123.02 (d,  $J=2.6$  Hz), 124.23, 128.86, 129.85 (d,  $J=8.1$  Hz), 137.89, 138.28, 140.23 (d,  $J=7.4$  Hz), 153.52, 155.56 (d,  $J=2.5$  Hz), 161.07, 162.94 (d,  $J=245.4$  Hz), 164.10, 166.33, 169.74. FT-IR: wavenumber ( $\text{cm}^{-1}$ ) 1651 (m), 1599 (m), 1547 (s), 1468 (m), 1439 (m), 1383 (m), 1317 (s), 1265 (m), 1024 (m), 785 (s), 752 (s). MS (ES-API),  $m/z$ : calcd for  $\text{C}_{24}\text{H}_{19}\text{FN}_4\text{O}_2$ : 414.15; found: 415.1 [ $\text{M}+\text{H}^+$ ]. m.p. 110-112  $^{\circ}\text{C}$ .

• **4-(6-(4-Fluorophenyl)pyridin-2-yl)-2-methoxy-6-methyl-N-phenylpyrimidine-5-carboxamide (14l):**

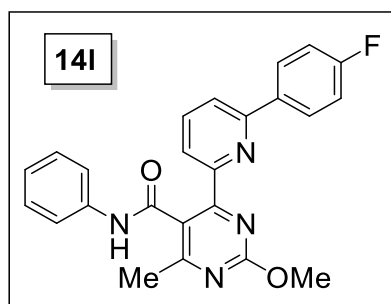

White solid. Yield: 99%.  $^1\text{H}$  NMR ( $\text{CDCl}_3$ ):  $\delta_{\text{H}}$  (ppm) 2.58 (s, 3H), 4.04 (s, 3H), 6.67 (app. t, 2H,  $J=8.7$  Hz), 7.11 (t, 1H,  $J=7.4$  Hz), 7.27 (app. t, 2H,  $J=7.6$  Hz), 7.52 (d, 2H,  $J=8.0$  Hz), 7.66 (d, 1H,  $J=7.9$  Hz), 7.78 (m, 2H), 7.79 (app. t, 1H,  $J=7.8$  Hz), 7.99 (bs, 1H), 8.24 (d, 1H,  $J=7.7$  Hz).  $^{13}\text{C}$  NMR ( $\text{CDCl}_3$ ):  $\delta_{\text{C}}$  (ppm) 22.33, 54.97, 115.16 (d,  $J=21.7$  Hz), 119.62, 121.51, 121.52, 122.61, 124.31, 128.96, 129.09 (d,  $J=8.3$  Hz), 134.13 (d,  $J=2.9$  Hz), 137.78, 138.43, 153.39, 155.89, 161.10, 163.42 (d,  $J=248.9$  Hz), 164.21, 166.55, 169.72. FT-IR: wavenumber ( $\text{cm}^{-1}$ ) 1645 (m), 1597 (m), 1543 (s), 1510 (m), 1464 (m), 1439 (s), 1379 (m), 1315 (s), 1223 (m), 1167 (m), 795 (s), 760 (s). MS (ES-API),  $m/z$ : calcd for  $\text{C}_{24}\text{H}_{19}\text{FN}_4\text{O}_2$ : 414.15; found: 415.1 [ $\text{M}+\text{H}^+$ ]. m.p. 221-223  $^{\circ}\text{C}$ .

• **4-(6-(3,5-Difluorophenyl)pyridin-2-yl)-2-methoxy-6-methyl-N-phenylpyrimidine-5-carboxamide (14m):**

White solid. Yield: 96%.  $^1\text{H}$  NMR ( $\text{CDCl}_3$ ):  $\delta_{\text{H}}$  (ppm) 2.63 (s, 3H), 4.09 (s, 3H), 6.67 (tt, 1H,  $J_1=8.6$  Hz,  $J_2=2.2$  Hz), 7.05 (t, 1H,  $J=7.5$  Hz), 7.22 (app. t, 2H,  $J=7.8$  Hz), 7.40 (d, 2H,  $J=7.3$  Hz), 7.47 (d, 2H,  $J=8.1$  Hz), 7.66 (bs, 1H), 7.69 (d, 1H,  $J=7.9$  Hz), 7.89 (app. t, 1H,  $J=7.8$  Hz), 8.35 (d, 1H,  $J=7.7$  Hz).  $^{13}\text{C}$  NMR ( $\text{CDCl}_3$ ):  $\delta_{\text{C}}$  (ppm) 22.36, 55.09, 104.24 (t,

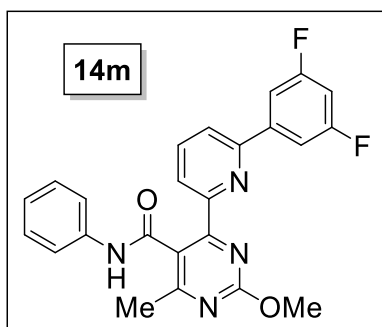

J=25.5 Hz), 110.07 (dd,  $J_1=21.1$  Hz,  $J_2=6.5$  Hz), 119.52, 121.93, 122.70, 122.78 (t,  $J=14.5$  Hz), 124.39, 128.88, 137.92, 138.13, 141.48 (t,  $J=9.6$  Hz), 153.73, 154.53, 160.92, 163.05 (dd,  $J_1=248.1$  Hz,  $J_2=12.9$  Hz), 164.25, 166.31, 169.96. FT-IR: wavenumber ( $\text{cm}^{-1}$ ) 1665 (m), 1598 (m), 1549 (s), 1439 (m), 1380 (m), 1321 (s), 1261 (m), 1121 (m), 988 (m), 795 (m), 756 (s), 698 (m). MS (ES-API), m/z: calcd for  $\text{C}_{24}\text{H}_{18}\text{F}_2\text{N}_4\text{O}_2$ : 432.14; found:

433.1  $[\text{M}+\text{H}^+]$ . m.p. 103-105 °C.

• **4-(6-(2-Chlorophenyl)pyridin-2-yl)-2-methoxy-6-methyl-N-phenylpyrimidine-5-carboxamide (14n):**

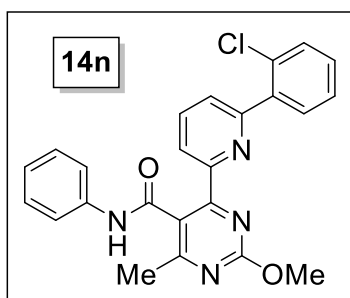

White solid. Yield: 96%.  $^1\text{H}$  NMR ( $\text{CDCl}_3$ ):  $\delta_{\text{H}}$  (ppm) 2.61 (s, 3H), 4.09 (s, 3H), 6.77 (app. dt, 1H,  $J_1=7.5$  Hz,  $J_2=0.9$  Hz), 7.05 (t, 1H,  $J=7.4$  Hz), 7.12 (app. dt, 1H,  $J_1=7.7$  Hz,  $J_2=1.5$  Hz), 7.18 (app. t, 2H,  $J=7.7$  Hz), 7.28 (dd, 1H,  $J_1=8.1$  Hz,  $J_2=0.9$  Hz), 7.35 (d, 2H,  $J=8.0$  Hz), 7.40 (dd, 1H,  $J_1=7.7$  Hz,  $J_2=1.5$  Hz), 7.76 (d, 1H,  $J=7.9$  Hz), 7.88 (m, 2H, 2 signals overlapping), 8.28 (d, 1H,  $J=7.7$  Hz).  $^{13}\text{C}$  NMR

( $\text{CDCl}_3$ ):  $\delta_{\text{C}}$  (ppm) 22.33, 55.06, 119.63, 122.12, 123.10, 124.06, 126.60, 126.79, 128.79, 129.56, 129.58, 131.50, 132.46, 136.94, 137.63, 138.19, 153.56, 155.65, 161.29, 164.22, 166.22, 169.57. FT-IR: wavenumber ( $\text{cm}^{-1}$ ) 1641 (m), 1597 (m), 1553 (s), 1468 (m), 1443 (m), 1385 (m), 1323 (s), 1271 (m), 1246 (w), 1067 (m), 1040 (m), 880 (m), 799 (m), 750 (s), 692 (s). MS (ES-API), m/z: calcd for  $\text{C}_{24}\text{H}_{19}\text{ClN}_4\text{O}_2$ : 430.12; found: 431.1  $[\text{M}+\text{H}^+]$ . m.p. 176-178 °C.

• **2-Methoxy-4-methyl-N-phenyl-6-(6-(thiophen-2-yl)pyridin-2-yl)pyrimidine-5-carboxamide (14o):**

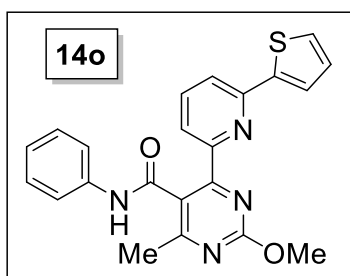

White solid. Yield: 99%.  $^1\text{H}$  NMR ( $\text{CDCl}_3$ ):  $\delta_{\text{H}}$  (ppm) 2.58 (s, 3H), 4.03 (s, 3H), 6.81 (app. t, 1H,  $J=4.3$  Hz), 7.07 (t, 1H,  $J=7.4$  Hz), 7.12 (d, 1H,  $J=4.9$  Hz), 7.24 (app. t, 2H,  $J=7.7$  Hz), 7.48 (d, 1H,  $J=3.7$  Hz), 7.57 (m, 3H, 2 signals overlapping), 7.71 (app. t, 1H,  $J=7.8$  Hz), 8.06 (d, 1H,  $J=7.8$  Hz), 8.10 (bs, 1H).  $^{13}\text{C}$  NMR ( $\text{CDCl}_3$ ):  $\delta_{\text{C}}$  (ppm) 22.43,

54.95, 119.88, 120.54, 121.43, 122.83, 124.12, 126.10, 127.44, 127.71, 128.74, 137.58, 138.54, 142.96, 152.03, 153.52, 161.17, 164.07, 166.04, 169.81. FT-IR: wavenumber ( $\text{cm}^{-1}$ ) 1661 (m), 1598 (m), 1551 (s), 1468 (m), 1439 (m), 1379 (m), 1317 (s), 1258 (m), 781 (s), 754 (s). MS (ES-API), m/z: calcd for  $\text{C}_{22}\text{H}_{18}\text{N}_4\text{O}_2\text{S}$ : 402.12; found: 403.1  $[\text{M}+\text{H}^+]$ . m.p. 230-232 °C.

• **2-Methoxy-4-methyl-N-phenyl-6-(6-(thiophen-3-yl)pyridin-2-yl)pyrimidine-5-carboxamide (14p):**

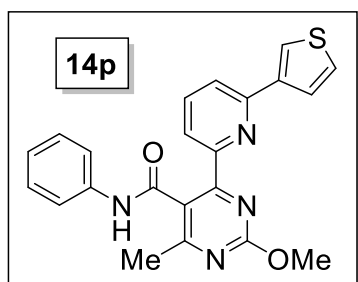

White solid. Yield: 99%.  $^1\text{H}$  NMR ( $\text{CDCl}_3$ ):  $\delta_{\text{H}}$  (ppm) 2.51 (s, 3H), 3.98 (s, 3H), 7.02 (dd, 1H,  $J_1=4.9$  Hz,  $J_2=3.1$  Hz), 7.08 (t, 1H,  $J=7.4$  Hz), 7.23 (app. t, 2H,  $J=7.7$  Hz), 7.42 (d, 1H,  $J=4.9$  Hz), 7.53 (m, 3H, 2 signals overlapping), 7.69 (dd, 1H,  $J_1=7.8$  Hz,  $J_2=2.0$  Hz), 7.72 (dd, 1H,  $J_1=3.1$  Hz,  $J_2=1.3$  Hz), 8.10 (d, 1H,  $J=7.8$  Hz), 8.26 (bs, 1H).  $^{13}\text{C}$  NMR ( $\text{CDCl}_3$ ):  $\delta_{\text{C}}$  (ppm) 22.21, 54.87, 119.91, 121.02, 121.49, 122.47, 124.27, 125.07, 125.65, 126.20, 128.81, 137.53, 138.36, 140.70, 152.82, 153.07, 160.89, 163.98, 166.64, 169.69. FT-IR: wavenumber ( $\text{cm}^{-1}$ ) 1651 (m), 1597 (m), 1545 (s), 1466 (m), 1441 (m), 1375 (m), 1323 (s), 1252 (m), 1063 (m), 795 (m), 756 (s), 712 (m). MS (ES-API),  $m/z$ : calcd for  $\text{C}_{22}\text{H}_{18}\text{N}_4\text{O}_2\text{S}$ : 402.12; found: 403.1 [ $\text{M}+\text{H}^+$ ]. m.p. 168-170  $^{\circ}\text{C}$ .

• **4-(6-(Benzofuran-2-yl)pyridin-2-yl)-2-methoxy-6-methyl-N-phenylpyrimidine-5-carboxamide (14q):**

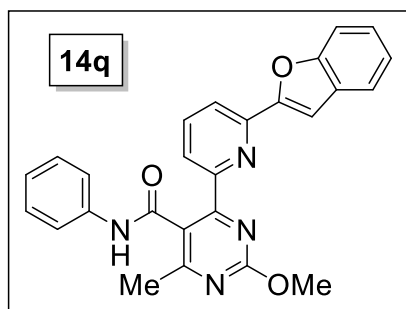

White solid. Yield: 98%.  $^1\text{H}$  NMR ( $\text{CDCl}_3$ ):  $\delta_{\text{H}}$  (ppm) 2.58 (s, 3H), 4.02 (s, 3H), 6.95 (s, 1H), 7.07-7.17 (m, 3H, 3 signals overlapping), 7.24 (tt, 1H,  $J_1=7.5$  Hz,  $J_2=1.6$  Hz), 7.29 (app. t, 2H,  $J=7.8$  Hz), 7.36 (d, 1H,  $J=8.3$  Hz), 7.68 (d, 2H,  $J=8.1$  Hz), 7.75 (app. t, 1H,  $J=7.8$  Hz), 7.80 (d, 1H,  $J=7.9$  Hz), 8.19 (d, 1H,  $J=7.7$  Hz), 8.23 (bs, 1H).  $^{13}\text{C}$  NMR ( $\text{CDCl}_3$ ):  $\delta_{\text{C}}$  (ppm) 22.32, 54.98, 106.61, 111.09, 119.82, 120.80, 121.87, 122.00, 122.63, 122.88, 124.40, 125.02, 128.70, 129.07, 137.68, 138.57, 148.63, 153.40, 153.89, 155.03, 160.47, 164.17, 166.58, 169.75. FT-IR: wavenumber ( $\text{cm}^{-1}$ ) 1659 (m), 1601 (m), 1541 (s), 1472 (m), 1439 (m), 1373 (m), 1312 (s), 1258 (s), 1171 (m), 1069 (w), 791 (s), 754 (m), 729 (m). MS (ES-API),  $m/z$ : calcd for  $\text{C}_{26}\text{H}_{20}\text{N}_4\text{O}_3$ : 436.15; found: 437.1 [ $\text{M}+\text{H}^+$ ]. m.p. 196-198  $^{\circ}\text{C}$ .

• **4-(6-(Benzofuran-3-yl)pyridin-2-yl)-2-methoxy-6-methyl-N-phenylpyrimidine-5-carboxamide (14r):**

White solid. Yield: 98%.  $^1\text{H}$  NMR ( $\text{CDCl}_3$ ):  $\delta_{\text{H}}$  (ppm) 2.61 (s, 3H), 4.06 (s, 3H), 7.02 (t, 1H,  $J=7.4$  Hz), 7.16 (app. t, 2H,  $J=7.7$  Hz), 7.25-7.33 (m, 2H, 2 signals overlapping), 7.39 (d, 2H,  $J=8.0$  Hz), 7.47 (dd, 1H,  $J_1=7.6$  Hz,  $J_2=1.3$  Hz), 7.72 (d, 1H,  $J=7.8$  Hz), 7.83-7.87 (m, 2H, 2 signals overlapping), 7.91 (dd, 1H,  $J_1=7.4$  Hz,  $J_2=1.5$  Hz), 7.99 (s, 1H), 8.19 (d, 1H,  $J=7.8$  Hz).  $^{13}\text{C}$  NMR ( $\text{CDCl}_3$ ):  $\delta_{\text{C}}$  (ppm) 22.27, 54.92, 111.76, 119.74, 120.48, 120.61,

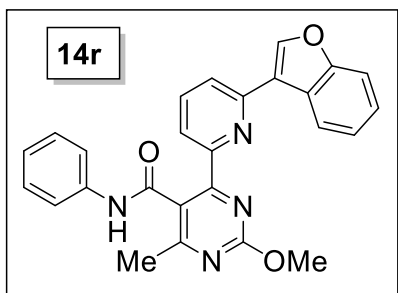

121.18, 122.17, 122.61, 123.11, 124.31, 124.35, 124.86, 128.80, 137.57, 138.04, 146.54, 151.28, 153.54, 155.75, 160.97, 164.07, 166.46, 169.78. FT-IR: wavenumber ( $\text{cm}^{-1}$ ) 1649 (m), 1595 (m), 1545 (s), 1470 (m), 1441 (m), 1373 (m), 1315 (m), 1261 (m), 1103 (m), 795 (m), 745 (s). MS (ES-API),  $m/z$ : calcd for  $\text{C}_{26}\text{H}_{20}\text{N}_4\text{O}_3$ : 436.15; found: 437.1  $[\text{M}+\text{H}^+]$ . m.p. 108-110  $^{\circ}\text{C}$ .

• **Ethyl 2-methoxy-4-methyl-6-(6-phenylpyridin-2-yl)pyrimidine-5-carboxylate (15a):**

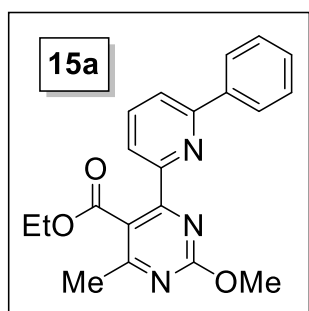

White solid. Yield: 67%.  $^1\text{H}$  NMR ( $\text{CDCl}_3$ ):  $\delta_{\text{H}}$  (ppm) 1.01 (t, 3H,  $J=7.1$  Hz), 2.60 (s, 3H), 4.11 (q, 2H,  $J=7.1$  Hz), 4.12 (s, 3H), 7.43 (tt, 1H,  $J_1=7.3$  Hz,  $J_2=1.5$  Hz), 7.49 (app. t, 2H,  $J=7.5$  Hz), 7.84 (dd, 1H,  $J_1=7.9$  Hz,  $J_2=0.8$  Hz), 7.92 (app. t, 1H,  $J=7.8$  Hz), 8.03 (m, 2H), 8.28 (dd, 1H,  $J_1=7.7$  Hz,  $J_2=0.8$  Hz).  $^{13}\text{C}$  NMR ( $\text{CDCl}_3$ ):  $\delta_{\text{C}}$  (ppm) 13.73, 22.36, 55.05, 61.41, 119.85, 121.50, 121.69, 127.16, 128.65, 129.32, 137.79, 138.50, 153.64, 156.44, 162.84, 164.34, 168.55, 169.00. FT-IR: wavenumber ( $\text{cm}^{-1}$ ) 1717 (s), 1549 (s), 1470 (m), 1364 (m), 1252 (s), 1200 (m), 1076 (s), 799 (m), 772 (s). MS (ES-API),  $m/z$ : calcd for  $\text{C}_{20}\text{H}_{19}\text{N}_3\text{O}_3$ : 349.14; found: 350.1  $[\text{M}+\text{H}^+]$ . m.p. 82-84  $^{\circ}\text{C}$ .

• **Ethyl 2-methoxy-4-methyl-6-(6-(*o*-tolyl)pyridin-2-yl)pyrimidine-5-carboxylate (15b):**

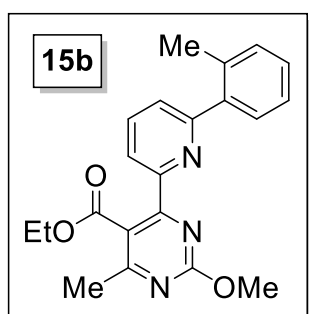

Colorless oil. Yield: 97%.  $^1\text{H}$  NMR ( $\text{CDCl}_3$ ):  $\delta_{\text{H}}$  (ppm) 0.93 (t, 3H,  $J=7.2$  Hz), 2.32 (s, 3H), 2.52 (s, 3H), 3.82 (q, 2H,  $J=7.2$  Hz), 4.10 (s, 3H), 7.22-7.32 (m, 3H, 3 signals overlapping), 7.38 (m, 1H), 7.46 (d, 1H,  $J=7.9$  Hz), 7.89 (app. t, 1H,  $J=7.9$  Hz), 8.36 (dd, 1H,  $J_1=7.9$  Hz,  $J_2=0.8$  Hz).  $^{13}\text{C}$  NMR ( $\text{CDCl}_3$ ):  $\delta_{\text{C}}$  (ppm) 13.53, 20.17, 22.24, 55.00, 61.34, 120.03, 120.86, 125.58, 125.63, 128.44, 129.71, 130.57, 135.97, 137.15, 139.90, 152.73, 158.79, 161.83, 164.34, 168.52, 168.75. FT-IR: wavenumber ( $\text{cm}^{-1}$ ) 1724 (s), 1551 (s), 1470 (s), 1379 (m), 1360 (m), 1265 (s), 1246 (m), 1225 (m), 1167 (m), 1070 (s), 872 (m), 802 (m), 762 (m), 700 (m), 625 (m). MS (ES-API),  $m/z$ : calcd for  $\text{C}_{21}\text{H}_{21}\text{N}_3\text{O}_3$ : 363.16; found: 364.1  $[\text{M}+\text{H}^+]$ .

• Ethyl 2-methoxy-4-methyl-6-(6-(*m*-tolyl)pyridin-2-yl)pyrimidine-5-carboxylate (15c):

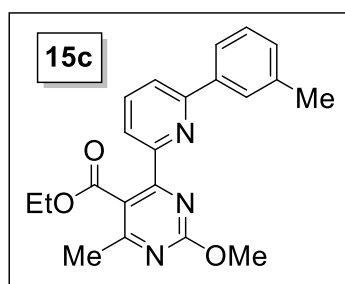

White solid. Yield: 89%.  $^1\text{H}$  NMR ( $\text{CDCl}_3$ ):  $\delta_{\text{H}}$  (ppm) 1.01 (t, 3H,  $J=7.1$  Hz), 2.46 (s, 3H), 2.60 (s, 3H), 4.11 (s, 3H), 4.12 (q, 2H,  $J=7.1$  Hz), 7.25 (d, 1H,  $J=7.5$  Hz), 7.37 (app. t, 1H,  $J=7.6$  Hz), 7.81 (m, 2H, 2 signals overlapping), 7.87 (s, 1H), 7.89 (app. t, 1H,  $J=7.8$  Hz), 8.26 (d, 1H,  $J=7.7$  Hz).  $^{13}\text{C}$  NMR ( $\text{CDCl}_3$ ):  $\delta_{\text{C}}$  (ppm) 13.74, 21.48, 22.33, 55.00, 61.31, 119.81, 121.37, 121.69, 124.22, 127.88, 128.50, 130.03, 137.68, 138.23, 138.41, 153.52, 156.55, 162.84, 164.31, 168.50, 168.95. FT-IR: wavenumber ( $\text{cm}^{-1}$ ) 1721 (s), 1551 (s), 1468 (m), 1377 (m), 1360 (m), 1250 (s), 1072 (s), 787 (s), 746 (m). MS (ES-API),  $m/z$ : calcd for  $\text{C}_{21}\text{H}_{21}\text{N}_3\text{O}_3$ : 363.16; found: 364.1  $[\text{M}+\text{H}^+]$ . m.p. 84-86 °C.

• Ethyl 4-(6-([1,1'-biphenyl]-4-yl)pyridin-2-yl)-2-methoxy-6-methylpyrimidine-5-carboxylate (15d):

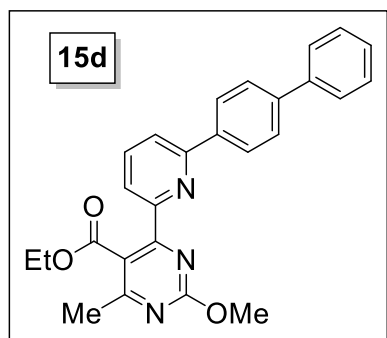

White solid. Yield: 98%.  $^1\text{H}$  NMR ( $\text{CDCl}_3$ ):  $\delta_{\text{H}}$  (ppm) 1.04 (t, 3H,  $J=7.2$  Hz), 2.62 (s, 3H), 4.12 (s, 3H), 4.15 (q, 2H,  $J=7.2$  Hz), 7.38 (tt, 1H,  $J_1=7.4$  Hz,  $J_2=1.2$  Hz), 7.48 (app. t, 2H,  $J=7.6$  Hz), 7.68 (m, 2H), 7.74 (d, 2H,  $J=8.4$  Hz), 7.88 (dd, 1H,  $J_1=8.0$  Hz,  $J_2=1.0$  Hz), 7.93 (app. t, 1H,  $J=7.8$  Hz), 8.12 (d, 2H,  $J=8.4$  Hz), 8.29 (dd, 1H,  $J_1=7.6$  Hz,  $J_2=1.0$  Hz).  $^{13}\text{C}$  NMR ( $\text{CDCl}_3$ ):  $\delta_{\text{C}}$  (ppm) 13.78, 22.37, 55.03, 61.44, 119.85, 121.51, 121.52, 127.01, 127.30, 127.54, 127.60, 128.84, 137.35, 137.79, 140.37, 141.98, 153.73, 155.98, 162.88, 164.37, 168.56, 169.02. FT-IR: wavenumber ( $\text{cm}^{-1}$ ) 1726 (s), 1553 (s), 1461 (m), 1381 (m), 1358 (m), 1246 (s), 1229 (m), 1184 (m), 1074 (m), 1051 (m), 799 (s), 766 (s), 748 (m). MS (ES-API),  $m/z$ : calcd for  $\text{C}_{26}\text{H}_{23}\text{N}_3\text{O}_3$ : 425.17; found: 426.1  $[\text{M}+\text{H}^+]$ . m.p. 142-144 °C.

• Ethyl 4-(6-(2-butoxyphenyl)pyridin-2-yl)-2-methoxy-6-methylpyrimidine-5-carboxylate (15e):

Beige solid. Yield: 48%.  $^1\text{H}$  NMR ( $\text{CDCl}_3$ ):  $\delta_{\text{H}}$  (ppm) 0.94 (t, 3H,  $J=7.4$  Hz), 1.02 (t, 3H,  $J=7.1$  Hz), 1.46 (app. sextet, 2H,  $J=7.4$  Hz), 1.77 (app. quintet, 2H,  $J=7.0$  Hz), 2.57 (s, 3H), 4.03 (t, 2H,  $J=6.6$  Hz), 4.05 (q, 2H,  $J=7.1$  Hz), 4.12 (s, 3H), 6.98 (d, 1H,  $J=8.4$  Hz), 7.09 (dt, 1H,  $J_1=7.5$  Hz,  $J_2=0.9$  Hz), 7.35 (ddd, 1H,  $J_1=8.4$  Hz,  $J_2=7.4$  Hz,  $J_3=1.7$  Hz), 7.84 (app. t, 1H,  $J=7.8$  Hz), 7.88 (dd, 1H,  $J_1=7.6$  Hz,  $J_2=1.7$  Hz), 8.06 (d, 1H,  $J=7.9$  Hz), 8.28 (dd, 1H,  $J_1=7.7$  Hz,  $J_2=0.7$  Hz).  $^{13}\text{C}$  NMR ( $\text{CDCl}_3$ ):  $\delta_{\text{C}}$  (ppm) 13.65, 13.77, 19.34, 22.26,

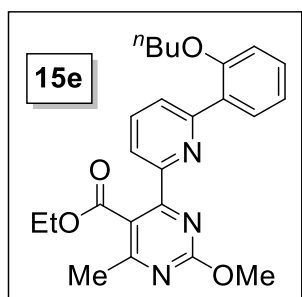

31.27, 55.01, 61.38, 68.11, 112.13, 119.81, 120.64, 120.87, 126.89, 128.12, 130.20, 131.94, 136.33, 152.96, 155.00, 156.64, 162.58, 164.26, 168.56, 168.75. FT-IR: wavenumber ( $\text{cm}^{-1}$ ) 2800 (m), 1721 (s), 1557 (s), 1464 (m), 1358 (m), 1248 (s), 1169 (m), 1072 (m), 1010 (m), 799 (m), 760 (s). MS (ES-API),  $m/z$ : calcd for  $\text{C}_{24}\text{H}_{27}\text{N}_3\text{O}_4$ : 421.20; found: 422.1  $[\text{M}+\text{H}^+]$ . m.p. 76-78 °C.

• **Ethyl 2-methoxy-4-(6-(4-methoxyphenyl)pyridin-2-yl)-6-methylpyrimidine-5-carboxylate (15g):**

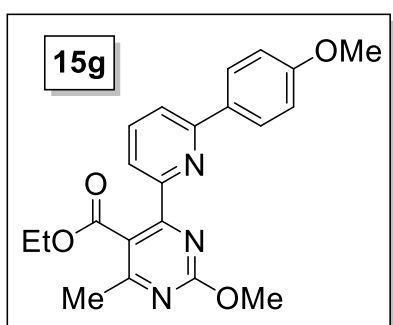

White solid. Yield: 85%.  $^1\text{H}$  NMR ( $\text{CDCl}_3$ ):  $\delta_{\text{H}}$  (ppm) 1.01 (t, 3H,  $J=7.1$  Hz), 2.60 (s, 3H), 3.87 (s, 3H), 4.10 (q, 2H,  $J=7.1$  Hz), 4.11 (s, 3H), 7.01 (d, 2H,  $J=8.8$  Hz), 7.76 (dd, 1H,  $J_1=7.9$  Hz,  $J_2=0.7$  Hz), 7.87 (app. t, 1H,  $J=7.8$  Hz), 7.99 (d, 2H,  $J=8.8$  Hz), 8.20 (dd, 1H,  $J_1=7.7$  Hz,  $J_2=0.7$  Hz).  $^{13}\text{C}$  NMR ( $\text{CDCl}_3$ ):  $\delta_{\text{C}}$  (ppm) 13.75, 22.34, 55.02, 55.31, 61.39, 113.98, 119.78, 120.75, 120.84, 128.49, 131.09, 137.66, 153.48, 156.08, 160.67, 163.06, 164.34, 168.61, 168.96. FT-IR: wavenumber ( $\text{cm}^{-1}$ ) 1713 (s), 1547 (s), 1468 (m), 1373 (m), 1244 (s), 1184 (m), 1102 (m), 1063 (m), 1032 (m), 793 (s). MS (ES-API),  $m/z$ : calcd for  $\text{C}_{21}\text{H}_{21}\text{N}_3\text{O}_4$ : 379.15; found: 380.1  $[\text{M}+\text{H}^+]$ . m.p. 76-78 °C.

• **Ethyl 4-(6-(2-fluorophenyl)pyridin-2-yl)-2-methoxy-6-methylpyrimidine-5-carboxylate (15j):**

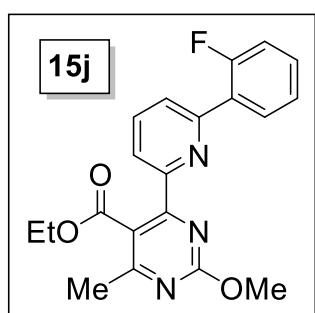

Colorless oil. Yield: 74%.  $^1\text{H}$  NMR ( $\text{CDCl}_3$ ):  $\delta_{\text{H}}$  (ppm) 1.02 (t, 3H,  $J=7.2$  Hz), 2.58 (s, 3H), 4.05 (q, 2H,  $J=7.2$  Hz), 4.12 (s, 3H), 7.16 (dd, 1H,  $J_1=11.7$  Hz,  $J_2=8.2$  Hz,  $J_3=1.0$  Hz), 7.30 (dt, 1H,  $J_1=7.6$  Hz,  $J_2=1.0$  Hz), 7.39 (m, 1H), 7.89-7.95 (m, 2H, 2 signals overlapping), 8.04 (dt, 1H,  $J_1=7.9$  Hz,  $J_2=1.8$  Hz), 8.33 (dd, 1H,  $J_1=6.5$  Hz,  $J_2=2.3$  Hz).  $^{13}\text{C}$  NMR ( $\text{CDCl}_3$ ):  $\delta_{\text{C}}$  (ppm) 13.68, 22.34, 55.05, 61.37, 116.10 (d,  $J=22.7$  Hz), 119.79, 121.73, 124.39 (d,  $J=3.6$  Hz), 125.98 (d,  $J=10.9$  Hz), 126.53 (d,  $J=10.9$  Hz), 130.78 (d,  $J=8.8$  Hz), 131.69 (d,  $J=2.7$  Hz), 137.46, 152.29 (d,  $J=2.7$  Hz), 153.61, 160.63 (d,  $J=249.9$  Hz), 162.31, 164.36, 168.54, 169.00. FT-IR: wavenumber ( $\text{cm}^{-1}$ ) 1726 (m), 1551 (s), 1462 (s), 1433 (w), 1380 (m), 1360 (m), 1288 (m), 1265 (s), 1246 (m), 1169 (m), 1072 (s), 890 (m), 829 (m), 800 (m), 760 (m), 677 (m). MS (ES-API),  $m/z$ : calcd for  $\text{C}_{20}\text{H}_{18}\text{FN}_3\text{O}_3$ : 367.13; found: 368.1  $[\text{M}+\text{H}^+]$ .

• **Ethyl 4-(6-(3-fluorophenyl)pyridin-2-yl)-2-methoxy-6-methylpyrimidine-5-carboxylate (15k):**

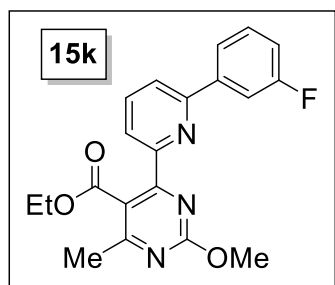

White solid. Yield: 91%.  $^1\text{H}$  NMR ( $\text{CDCl}_3$ ):  $\delta_{\text{H}}$  (ppm) 1.08 (t, 3H,  $J=7.2$  Hz), 2.62 (s, 3H), 4.13 (s, 3H), 4.17 (q, 2H,  $J=7.2$  Hz), 7.13 (app. ddt, 1H,  $J_1=8.3$  Hz,  $J_2=2.5$  Hz,  $J_3=0.8$  Hz), 7.46 (app. dt, 1H,  $J_1=8.0$  Hz,  $J_2=5.9$  Hz), 7.77 (ddd, 1H,  $J_1=10.5$  Hz,  $J_2=2.5$  Hz,  $J_3=1.7$  Hz), 7.80 (ddd, 1H,  $J_1=7.9$  Hz,  $J_2=1.7$  Hz,  $J_3=0.8$  Hz), 7.83 (dd, 1H,  $J_1=7.9$  Hz,  $J_2=0.8$  Hz), 7.94 (app. t, 1H,  $J=7.8$  Hz), 8.31 (dd, 1H,  $J=7.7$  Hz, 0.8 Hz).

$^{13}\text{C}$  NMR ( $\text{CDCl}_3$ ):  $\delta_{\text{C}}$  (ppm) 13.79, 22.25, 55.18, 61.51, 114.11 (d,  $J=23.1$  Hz), 116.22 (d,  $J=21.2$  Hz), 119.96, 121.82, 122.16, 122.66 (d,  $J=2.9$  Hz), 130.22 (d,  $J=8.2$  Hz), 138.03, 140.81 (d,  $J=7.7$  Hz), 153.72, 155.11 (d,  $J=2.7$  Hz), 162.70, 163.27 (d,  $J=245.8$  Hz), 164.17, 168.37, 168.94. FT-IR: wavenumber ( $\text{cm}^{-1}$ ) 1721 (s), 1547 (s), 1470 (m), 1358 (m), 1250 (s), 1190 (m), 1076 (s), 781 (s), 735 (m). MS (ES-API),  $m/z$ : calcd for  $\text{C}_{20}\text{H}_{18}\text{FN}_3\text{O}_3$ : 367.13; found: 368.1 [ $\text{M}+\text{H}^+$ ]. m.p. 106-108  $^{\circ}\text{C}$ .

• **4-(6-([1,1':3',1''-Terphenyl]-2'-yl)pyridin-2-yl)-2-methoxy-6-methyl-*N*-phenylpyrimidine-5-carboxamide (17a):**

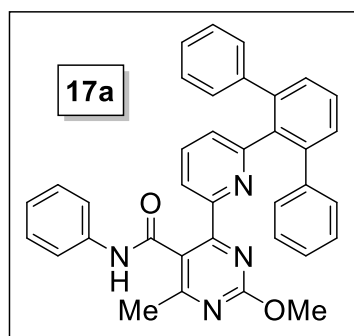

White solid. Yield: 61%.  $^1\text{H}$  NMR ( $\text{CDCl}_3$ ):  $\delta_{\text{H}}$  (ppm) 2.56 (s, 3H), 4.05 (s, 3H), 6.90 (m, 4H), 6.94 (d, 1H,  $J=7.8$  Hz), 7.00 (tt, 1H,  $J_1=7.1$  Hz,  $J_2=1.3$  Hz), 7.03-7.09 (m, 8H, 3 signals overlapping), 7.10 (app. t, 2H,  $J=7.6$  Hz), 7.27 (d, 2H,  $J=7.6$  Hz), 7.40 (bs, 1H), 7.43 (t, 1H,  $J=7.6$  Hz), 7.46 (app. t, 1H,  $J=7.8$  Hz), 7.99 (d, 1H,  $J=7.8$  Hz).  $^{13}\text{C}$  NMR ( $\text{CDCl}_3$ ):  $\delta_{\text{C}}$  (ppm) 22.34, 54.94, 120.48, 120.95, 123.09, 124.22, 126.31, 127.61, 128.21, 128.33, 128.76, 129.25,

129.57, 135.94, 137.29, 137.73, 141.18, 141.69, 152.75, 158.04, 161.30, 164.16, 166.26, 169.03. FT-IR: wavenumber ( $\text{cm}^{-1}$ ) 1645 (m), 1549 (s), 1470 (m), 1439 (m), 1373 (m), 1317 (s), 1271 (w), 1065 (m), 799 (m), 758 (s). MS (ES-API),  $m/z$ : calcd for  $\text{C}_{36}\text{H}_{28}\text{N}_4\text{O}_2$ : 548.22; found: 549.2 [ $\text{M}+\text{H}^+$ ]. m.p. 110-112  $^{\circ}\text{C}$ .

• **2-Methoxy-4-methyl-6-(6-(3-methyl-[1,1'-biphenyl]-2-yl)pyridin-2-yl)-*N*-phenylpyrimidine-5-carboxamide (17b):**

White solid. Yield: 67%.  $^1\text{H}$  NMR ( $\text{CDCl}_3$ ):  $\delta_{\text{H}}$  (ppm) 2.03 (s, 3H), 2.64 (s, 3H), 4.11 (s, 3H), 6.83 (d, 1H,  $J=7.8$  Hz), 6.87 (m, 2H), 6.92 (t, 1H,  $J=7.4$  Hz), 7.01 (app. t, 2H,  $J=7.7$  Hz), 7.03-7.09 (m, 4H, 3 signals overlapping), 7.09-7.17 (m, 3H, 2 signals overlapping), 7.26 (app. t, 1H,  $J=7.6$  Hz), 7.55 (app. t, 1H,  $J=7.8$  Hz), 7.68 (bs, 1H), 8.20 (d, 1H,  $J=7.8$  Hz).  $^{13}\text{C}$  NMR ( $\text{CDCl}_3$ ):  $\delta_{\text{C}}$  (ppm) 20.45, 22.36, 55.01, 119.73, 121.06, 123.17, 124.00,

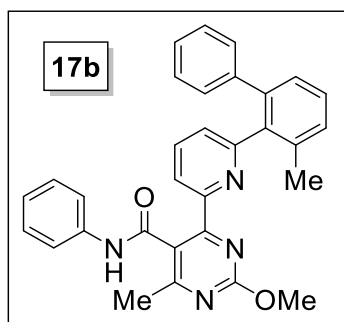

126.21, 127.22, 127.25, 127.58, 128.03, 128.70, 129.27, 129.60, 136.82, 136.85, 136.94, 137.52, 140.99, 141.35, 152.82, 158.69, 161.25, 164.36, 166.35, 169.59. FT-IR: wavenumber ( $\text{cm}^{-1}$ ) 1659 (w), 1599 (w), 1557 (s), 1472 (m), 1445 (m), 1377 (m), 1323 (s), 797 (m), 752 (s), 746 (m). MS (ES-API),  $m/z$ : calcd for  $\text{C}_{31}\text{H}_{26}\text{N}_4\text{O}_2$ : 486.21; found: 487.2  $[\text{M}+\text{H}^+]$ . m.p. 99-101 °C.

• **2-Methoxy-4-methyl-6-(6-(4'-methyl-[1,1':3',1''-terphenyl]-2'-yl)pyridin-2-yl)-N-phenylpyrimidine-5-carboxamide (17c):**

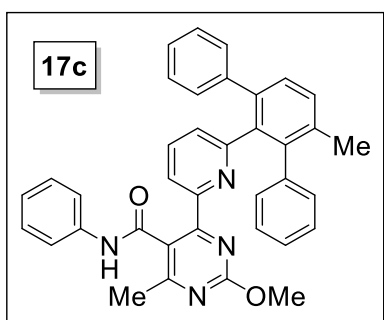

White solid. Yield: 59%.  $^1\text{H}$  NMR ( $\text{CDCl}_3$ ):  $\delta_{\text{H}}$  (ppm) 2.07 (s, 3H), 2.58 (s, 3H), 4.03 (s, 3H), 6.88 (d, 1H,  $J=7.7$  Hz), 6.92 (d, 2H,  $J=7.0$  Hz), 6.98-7.06 (m, 7H, 4 signals overlapping), 7.07-7.17 (m, 6H, 4 signals overlapping), 7.21 (d, 1H,  $J=7.8$  Hz), 7.33 (d, 1H,  $J=7.8$  Hz), 7.37 (app. t, 1H,  $J=7.8$  Hz), 7.63 (bs, 1H), 7.87 (d, 1H,  $J=7.9$  Hz).  $^{13}\text{C}$  NMR ( $\text{CDCl}_3$ ):  $\delta_{\text{C}}$  (ppm) 20.72, 22.42, 54.91, 120.35, 120.66, 123.05, 124.17, 126.09, 126.16, 127.45, 127.51, 127.58, 127.89, 128.79, 128.90, 129.49, 130.04, 135.38, 135.55, 137.44, 138.60, 138.92, 139.72, 141.22, 141.30, 152.54, 158.32, 161.27, 164.12, 166.23, 169.26. FT-IR: wavenumber ( $\text{cm}^{-1}$ ) 1649 (m), 1599 (m), 1555 (s), 1470 (m), 1441 (m), 1368 (m), 1315 (s), 1265 (m), 783 (s), 748 (s). MS (ES-API),  $m/z$ : calcd for  $\text{C}_{37}\text{H}_{30}\text{N}_4\text{O}_2$ : 562.24; found: 563.2  $[\text{M}+\text{H}^+]$ . m.p. 92-93 °C.

• **2-Methoxy-4-methyl-N-phenyl-6-(6-(5'-phenyl-[1,1':3',1''-terphenyl]-2'-yl)pyridin-2-yl)pyrimidine-5-carboxamide (17d):**

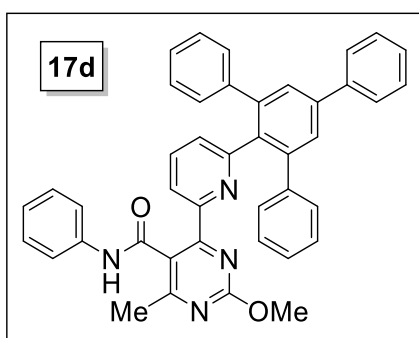

White solid. Yield: 63%.  $^1\text{H}$  NMR ( $\text{CDCl}_3$ ):  $\delta_{\text{H}}$  (ppm) 2.56 (s, 3H), 4.06 (s, 3H), 6.87 (t, 1H,  $J=7.4$  Hz), 6.98 (dd, 4H,  $J_1=7.8$  Hz,  $J_2=2.2$  Hz), 6.98-7.02 (m, 3H, signals overlapping), 7.08-7.12 (m, 6H, signals overlapping), 7.17 (d, 2H,  $J=7.8$  Hz), 7.37 (bs, 1H), 7.41 (t, 1H,  $J=7.6$  Hz), 7.47-7.53 (m, 5H, signals overlapping), 7.67 (d, 2H,  $J=7.6$  Hz), 8.03 (dd, 1H,  $J_1=7.8$  Hz,  $J_2=0.8$  Hz).  $^{13}\text{C}$  NMR ( $\text{CDCl}_3$ ):  $\delta_{\text{C}}$  (ppm) 22.35, 54.92, 120.42, 120.94, 123.12, 124.22, 126.46, 127.23, 127.64, 127.70, 127.96, 128.22, 128.70, 128.85, 129.61, 135.98, 136.73, 137.26, 140.33, 141.02, 141.16, 142.19, 152.77, 157.93, 161.36, 164.20, 166.35, 168.92. FT-IR: wavenumber ( $\text{cm}^{-1}$ ) 1649 (m), 1599 (m), 1549 (s), 1472 (m), 1441 (m), 1371 (m), 1315 (s), 1263 (m), 1057



(m), 797 (m), 766 (s). MS (ES-API), m/z: calcd for C<sub>42</sub>H<sub>32</sub>N<sub>4</sub>O<sub>2</sub>: 624.25; found: 625.2 [M+H<sup>+</sup>]. m.p. 148-150 °C.

• **4-(6-(3-Butoxy-[1,1'-biphenyl]-2-yl)pyridin-2-yl)-2-methoxy-6-methyl-N-phenyl-pyrimidine-5-carboxamide (17e):**

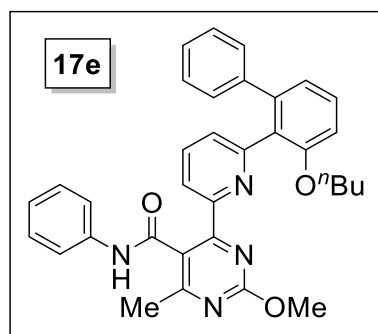

White solid. Yield: 68%. <sup>1</sup>H NMR (CDCl<sub>3</sub>): δ<sub>H</sub> (ppm) 0.72 (t, 3H, J=7.4 Hz), 1.12 (app. sextet, 2H, J=7.5 Hz), 1.42 (quint., 2H, J=7.0 Hz), 2.61 (s, 3H), 3.63 (t, 2H, J=6.4 Hz), 4.08 (s, 3H), 6.71 (d, 1H, J=8.3 Hz), 6.92 (d, 1H, J=7.7 Hz), 6.93-6.99 (m, 3H, 2 signals overlapping), 7.02-7.08 (m, 6H, 4 signals overlapping), 7.11 (d, 2H, J=8.1 Hz), 7.31 (app. t, 1H, J=8.0 Hz), 7.61 (app. t, 1H, J=7.8 Hz), 8.02 (bs, 1H), 8.07 (d, 1H, J=7.9 Hz). <sup>13</sup>C NMR (CDCl<sub>3</sub>): δ<sub>C</sub> (ppm) 13.62, 19.00, 22.54, 30.95, 54.95, 68.19, 111.22, 119.89, 121.24, 122.06, 123.34, 123.79, 126.34, 127.50, 127.59, 128.63, 128.87, 129.10, 129.51, 136.29, 137.75, 140.69, 142.51, 153.21, 155.95, 156.77, 161.44, 164.14, 166.13, 169.77. FT-IR: wavenumber (cm<sup>-1</sup>) 2924 (m), 1651 (m), 1601 (m), 1557 (s), 1467 (m), 1441 (m), 1380 (m), 1319 (s), 1265 (m), 1069 (m), 1026 (m), 797 (m), 758 (s), 748 (m). MS (ES-API), m/z: calcd for C<sub>34</sub>H<sub>32</sub>N<sub>4</sub>O<sub>3</sub>: 544.25; found: 545.1 [M+H<sup>+</sup>]. m.p. 100-102 °C.

• **2-Methoxy-4-(6-(3-methoxy-[1,1'-biphenyl]-2-yl)pyridin-2-yl)-6-methyl-N-phenyl-pyrimidine-5-carboxamide (17f):**

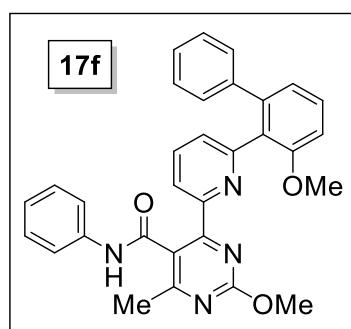

White solid. Yield: 71%. <sup>1</sup>H NMR (CDCl<sub>3</sub>): δ<sub>H</sub> (ppm) 2.60 (s, 3H), 3.45 (s, 3H), 4.07 (s, 3H), 6.67 (d, 1H, J=8.3 Hz), 6.93 (d, 1H, J=7.7 Hz), 6.94-7.00 (m, 4H, 3 signals overlapping), 7.03-7.11 (m, 5H, 3 signals overlapping), 7.16 (d, 2H, J=8.0 Hz), 7.31 (app. t, 1H, J=8.0 Hz), 7.58 (app. t, 1H, J=7.8 Hz), 7.95 (bs, 1H), 8.12 (d, 1H, J=7.9 Hz). <sup>13</sup>C NMR (CDCl<sub>3</sub>): δ<sub>C</sub> (ppm) 22.39, 54.91, 55.52, 109.90, 119.87, 121.15, 122.06, 123.30, 123.77, 126.39, 126.85, 127.49, 127.62, 128.66, 129.14, 129.57, 136.56, 137.89, 140.63, 142.51, 153.04, 156.00, 157.14, 161.26, 164.20, 166.26, 169.65. FT-IR: wavenumber (cm<sup>-1</sup>) 1647 (m), 1597 (m), 1549 (s), 1528 (m), 1470 (m), 1437 (m), 1371 (s), 1317 (s), 1256 (s), 1165 (w), 1070 (w), 1026 (m), 797 (m), 750 (s). MS (ES-API), m/z: calcd for C<sub>31</sub>H<sub>26</sub>N<sub>4</sub>O<sub>3</sub>: 502.20; found: 503.1 [M+H<sup>+</sup>]. m.p. 82-84 °C.

• **2-Methoxy-4-(6-(5'-methoxy-[1,1':3',1''-terphenyl]-2'-yl)pyridin-2-yl)-6-methyl-N-phenylpyrimidine-5-carboxamide (17g):**

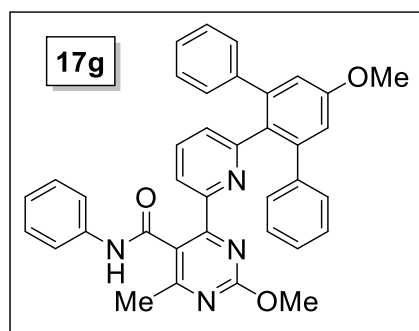

White solid. Yield: 65%.  $^1\text{H}$  NMR ( $\text{CDCl}_3$ ):  $\delta_{\text{H}}$  (ppm) 2.56 (s, 3H), 3.87 (s, 3H), 4.04 (s, 3H), 6.78 (s, 2H), 6.91 (m, 5H, 2 signals overlapping), 7.01 (t, 1H,  $J=7.3$  Hz), 7.05-7.09 (m, 6H, 2 signals overlapping), 7.11 (app. t, 2H,  $J=7.7$  Hz), 7.16 (d, 2H,  $J=8.1$  Hz), 7.40 (bs, 1H), 7.43 (app. t, 1H,  $J=7.8$  Hz), 7.96 (d, 1H,  $J=7.8$  Hz).  $^{13}\text{C}$  NMR ( $\text{CDCl}_3$ ):  $\delta_{\text{C}}$  (ppm) 22.34, 54.93, 55.34, 114.65, 120.45, 120.68, 123.13, 124.08, 126.44, 127.63, 128.45, 128.68, 129.45, 130.80, 135.84, 137.41, 141.20, 143.06, 152.67, 157.96, 158.96, 161.47, 164.15, 166.33, 168.95. FT-IR: wavenumber ( $\text{cm}^{-1}$ ) 1659 (m), 1599 (m), 1553 (s), 1514 (m), 1441 (m), 1323 (s), 1248 (s), 1179 (m), 1032 (m), 793 (s), 754 (s). MS (ES-API),  $m/z$ : calcd for  $\text{C}_{37}\text{H}_{30}\text{N}_4\text{O}_3$ : 578.23; found: 579.2  $[\text{M}+\text{H}^+]$ . m.p. 94-96  $^{\circ}\text{C}$ .

• **4-(6-(4',6'-Dimethoxy-[1,1':3',1''-terphenyl]-2'-yl)pyridin-2-yl)-2-methoxy-6-methyl-N-phenylpyrimidine-5-carboxamide (17h):**

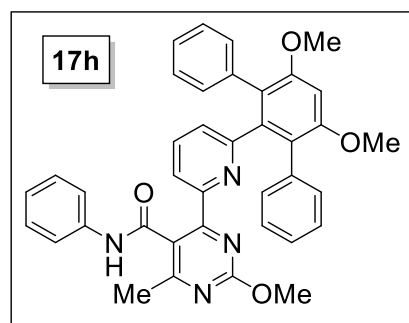

White solid. Yield: 55%.  $^1\text{H}$  NMR ( $\text{CDCl}_3$ ):  $\delta_{\text{H}}$  (ppm) 2.59 (s, 3H), 3.77 (s, 6H), 4.04 (s, 3H), 6.61 (s, 1H), 6.81 (d, 1H,  $J=7.7$  Hz), 6.90 (d, 4H,  $J=6.5$  Hz), 6.97 (t, 2H,  $J=7.2$  Hz), 7.00-7.06 (m, 5H, 2 signals overlapping), 7.15 (app. t, 2H,  $J=7.7$  Hz), 7.28 (d, 2H,  $J=8.1$  Hz), 7.32 (app. t, 1H,  $J=7.8$  Hz), 7.57 (bs, 1H), 7.85 (d, 1H,  $J=7.9$  Hz).  $^{13}\text{C}$  NMR ( $\text{CDCl}_3$ ):  $\delta_{\text{C}}$  (ppm) 22.40, 54.96, 56.00, 96.08, 120.47, 120.49, 123.06, 124.01, 125.99, 127.18, 127.82, 128.71, 131.04, 131.10, 135.45, 136.40, 137.71, 141.56, 152.26, 156.74, 157.64, 161.27, 164.10, 166.37, 169.08. FT-IR: wavenumber ( $\text{cm}^{-1}$ ) 1655 (m), 1595 (m), 1549 (s), 1462 (s), 1459 (m), 1375 (m), 1319 (s), 1260 (m), 1200 (m), 1155 (s), 1069 (m), 793 (s), 756 (s). MS (ES-API),  $m/z$ : calcd for  $\text{C}_{38}\text{H}_{32}\text{N}_4\text{O}_4$ : 608.24; found: 609.2  $[\text{M}+\text{H}^+]$ . m.p. 107-109  $^{\circ}\text{C}$ .

• **2-Methoxy-4-methyl-N-phenyl-6-(6-(5'-(trifluoromethyl)-[1,1':3',1''-terphenyl]-2'-yl)pyridin-2-yl)pyrimidine-5-carboxamide (17i):**

Beige solid. Yield: 51%.  $^1\text{H}$  NMR ( $\text{CDCl}_3$ ):  $\delta_{\text{H}}$  (ppm) 2.54 (s, 3H), 4.04 (s, 3H), 6.89-6.95 (m, 5H, 2 signals overlapping), 7.01 (t, 1H,  $J=7.5$  Hz), 7.08 (app. t, 2H,  $J=7.7$  Hz), 7.09-7.13 (m, 6H, 2 signals overlapping), 7.17 (d, 2H,  $J=7.9$  Hz), 7.24 (bs, 1H), 7.47 (s, 2H), 7.49 (app. t, 1H,  $J=7.8$  Hz), 8.08 (d, 1H,  $J=7.9$  Hz).  $^{13}\text{C}$  NMR ( $\text{CDCl}_3$ ):  $\delta_{\text{C}}$  (ppm) 22.22,

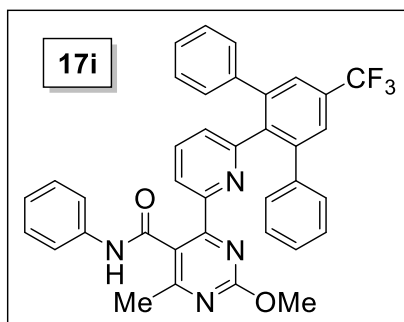

54.96, 119.76, 121.27, 122.85, 123.09, 124.42, 125.02, 125.79, 126.99, 127.85, 128.72, 129.46, 130.42, 136.23, 137.33, 139.80, 140.97, 142.45, 152.78, 156.95, 161.07, 164.25, 166.24, 168.84. FT-IR: wavenumber ( $\text{cm}^{-1}$ ) 1553 (s), 1443 (m), 1323 (s), 1256 (m), 1157 (m), 1109 (s), 1074 (m), 1015 (m), 760 (m). MS (ES-API),  $m/z$ : calcd for  $\text{C}_{37}\text{H}_{27}\text{F}_3\text{N}_4\text{O}_2$ : 616.21; found: 617.1  $[\text{M}+\text{H}^+]$ . m.p. 96-98 °C.

• **4-(6-(3-Fluoro-[1,1'-biphenyl]-2-yl)pyridin-2-yl)-2-methoxy-6-methyl-N-phenylpyrimidine-5-carboxamide (17j):**

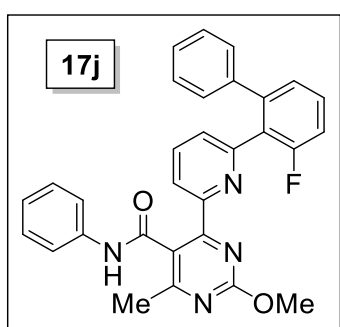

White solid. Yield: 61%.  $^1\text{H}$  NMR ( $\text{CDCl}_3$ ):  $\delta_{\text{H}}$  (ppm) 2.62 (s, 3H), 4.10 (s, 3H), 6.75 (app. t, 1H,  $J=8.9$  Hz), 6.91 (d, 1H,  $J=7.7$  Hz), 6.94-6.98 (m, 3H, 2 signals overlapping), 7.06 (m, 3H, 2 signals overlapping), 7.12 (m, 3H, 2 signals overlapping), 7.24 (m, 1H), 7.28 (d, 2H,  $J=8.1$  Hz), 7.59 (app. t, 1H,  $J=7.8$  Hz), 7.72 (bs, 1H), 8.20 (d, 1H,  $J=7.9$  Hz).  $^{13}\text{C}$  NMR ( $\text{CDCl}_3$ ):  $\delta_{\text{C}}$  (ppm) 22.29, 54.96, 114.32 (d,  $J=22.0$  Hz), 119.37, 121.53, 123.37, 123.72, 125.21 (d,  $J=2.9$  Hz), 126.90, 127.05, 127.17, 127.27, 127.88, 128.63, 129.48 (d,  $J=9.2$  Hz), 129.60, 136.75, 138.01, 139.47 (d,  $J=2.6$  Hz), 142.94 (d,  $J=2.2$  Hz), 153.34 (d,  $J=25.3$  Hz), 160.10 (d,  $J=248.0$  Hz), 161.13, 164.26, 166.33, 169.42. FT-IR: wavenumber ( $\text{cm}^{-1}$ ) 1641 (m), 1609 (w), 1543 (s), 1474 (m), 1317 (s), 1277 (m), 1209 (w), 1171 (w), 1067 (w), 799 (m), 758 (s). MS (ES-API),  $m/z$ : calcd for  $\text{C}_{30}\text{H}_{23}\text{FN}_4\text{O}_2$ : 490.18; found: 491.1  $[\text{M}+\text{H}^+]$ . m.p. 104-106 °C.

• **4-(6-(4'-Fluoro-[1,1':3',1''-terphenyl]-2'-yl)pyridin-2-yl)-2-methoxy-6-methyl-N-phenylpyrimidine-5-carboxamide (17k):**

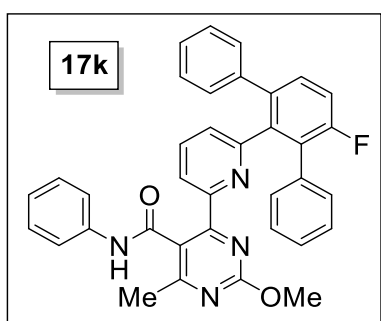

White solid. Yield: 60%.  $^1\text{H}$  NMR ( $\text{CDCl}_3$ ):  $\delta_{\text{H}}$  (ppm) 2.57 (s, 3H), 4.04 (s, 3H), 6.89 (m, 3H, 2 signals overlapping), 6.93 (d, 2H,  $J=6.4$  Hz), 7.03 (t, 1H,  $J=7.4$  Hz), 7.06-7.10 (m, 6H, 4 signals overlapping), 7.14 (app. t, 2H,  $J=7.7$  Hz), 7.16 (app. t, 1H,  $J=8.9$  Hz), 7.19-7.23 (m, 3H, 2 signals overlapping), 7.36 (bs, 1H), 7.44 (app. t, 1H,  $J=7.8$  Hz), 7.98 (d, 1H,  $J=7.9$  Hz).  $^{13}\text{C}$  NMR ( $\text{CDCl}_3$ ):  $\delta_{\text{C}}$  (ppm) 22.32, 54.97, 115.57 (d,  $J=22.6$  Hz), 120.08, 121.09, 123.05, 124.33, 126.43, 127.01, 127.28, 127.55, 127.70, 127.92, 128.81, 128.98 (d,  $J=7.4$  Hz), 129.54, 130.41, 130.49, 133.76, 136.05, 137.41, 137.58 (d,  $J=3.6$  Hz), 140.34, 152.61, 156.84, 158.92 (d,  $J=246.1$  Hz), 161.14, 164.18, 166.20,

168.97. FT-IR: wavenumber ( $\text{cm}^{-1}$ ) 1651 (m), 1597 (m), 1549 (s), 1470 (m), 1441 (m), 1379 (m), 1317 (s), 1267 (m), 1194 (w), 1070 (m), 785 (s), 758 (s). MS (ES-API),  $m/z$ : calcd for  $\text{C}_{36}\text{H}_{27}\text{FN}_4\text{O}_2$ : 566.21; found: 567.1  $[\text{M}+\text{H}^+]$ . m.p. 114-116  $^\circ\text{C}$ .

• **4-(6-(5'-Fluoro-[1,1':3',1''-terphenyl]-2'-yl)pyridin-2-yl)-2-methoxy-6-methyl-N-phenylpyrimidine-5-carboxamide (17l):**

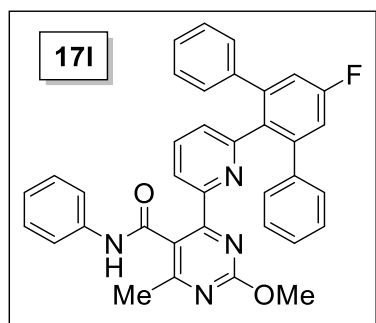

Beige solid. Yield: 52%.  $^1\text{H}$  NMR ( $\text{CDCl}_3$ ):  $\delta_{\text{H}}$  (ppm) 2.56 (s, 3H), 4.05 (s, 3H), 6.86-6.92 (m, 5H, 2 signals overlapping), 6.94 (d, 2H,  $J=9.3$  Hz), 7.05-7.11 (m, 8H, 4 signals overlapping), 7.14 (app. t, 2H,  $J=7.7$  Hz), 7.18 (d, 2H,  $J=8.1$  Hz), 7.46 (app. t, 1H,  $J=7.8$  Hz), 8.02 (d, 1H,  $J=7.9$  Hz).  $^{13}\text{C}$  NMR ( $\text{CDCl}_3$ ):  $\delta_{\text{C}}$  (ppm) 22.28, 54.95, 115.75 (d,  $J=21.3$  Hz), 120.08, 120.94, 123.08, 124.27, 126.80, 127.74, 128.28, 128.74, 129.37, 134.00, 136.05, 137.37, 140.14, 143.79 (d,  $J=8.2$  Hz), 152.69, 157.33, 161.26, 161.92 (d,  $J=247.8$  Hz), 164.20, 166.29, 168.85. FT-IR: wavenumber ( $\text{cm}^{-1}$ ) 1643 (m), 1597 (m), 1541 (s), 1508 (m), 1470 (m), 1439 (m), 1379 (m), 1317 (s), 1223 (m), 1167 (m), 1065 (m), 795 (s), 760 (s). MS (ES-API),  $m/z$ : calcd for  $\text{C}_{36}\text{H}_{27}\text{FN}_4\text{O}_2$ : 566.21; found: 567.2  $[\text{M}+\text{H}^+]$ . m.p. 115-117  $^\circ\text{C}$ .

• **4-(6-(4',6'-Difluoro-[1,1':3',1''-terphenyl]-2'-yl)pyridin-2-yl)-2-methoxy-6-methyl-N-phenylpyrimidine-5-carboxamide (17m):**

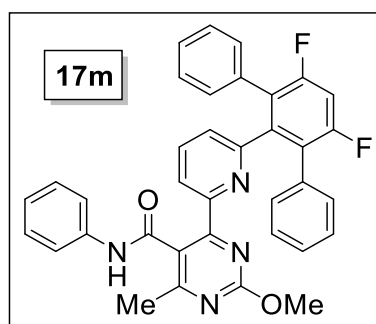

White solid. Yield: 53%.  $^1\text{H}$  NMR ( $\text{CDCl}_3$ ):  $\delta_{\text{H}}$  (ppm) 2.58 (s, 3H), 4.04 (s, 3H), 6.84 (d, 1H,  $J=7.7$  Hz), 6.91-6.95 (m, 5H, 2 signals overlapping), 7.03-7.15 (m, 7H, 3 signals overlapping), 7.20 (app. t, 2H,  $J=7.7$  Hz), 7.31 (d, 2H,  $J=8.1$  Hz), 7.33 (bs, 1H), 7.42 (app. t, 1H,  $J=7.8$  Hz), 7.98 (d, 1H,  $J=7.9$  Hz).  $^{13}\text{C}$  NMR ( $\text{CDCl}_3$ ):  $\delta_{\text{C}}$  (ppm) 22.34, 55.01, 104.01 (d,  $J=27.1$  Hz), 119.70, 121.22, 123.05, 124.46, 127.16, 127.44, 127.60, 127.66, 128.89, 130.56, 133.05, 136.08, 137.61, 142.17, 152.58, 155.74, 158.69 (dd,  $J_1=248.7$  Hz,  $J_2=12.9$  Hz), 161.05, 164.25, 166.23, 168.96. FT-IR: wavenumber ( $\text{cm}^{-1}$ ) 1665 (m), 1597 (m), 1547 (s), 1470 (m), 1439 (m), 1379 (m), 1321 (m), 1260 (m), 1119 (m), 988 (m), 793 (m), 756 (s), 698 (m). MS (ES-API),  $m/z$ : calcd for  $\text{C}_{36}\text{H}_{26}\text{F}_2\text{N}_4\text{O}_2$ : 584.20; found: 585.2  $[\text{M}+\text{H}^+]$ . m.p. 116-118  $^\circ\text{C}$ .

• **4-(6-(3-Chloro-[1,1'-biphenyl]-2-yl)pyridin-2-yl)-2-methoxy-6-methyl-N-phenylpyrimidine-5-carboxamide (17n):**

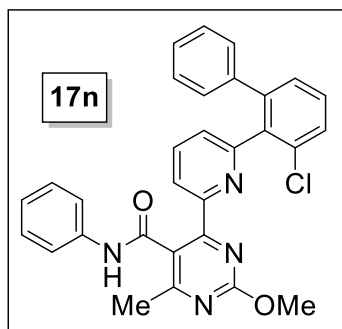

Beige solid. Yield: 71%.  $^1\text{H}$  NMR ( $\text{CDCl}_3$ ):  $\delta_{\text{H}}$  (ppm) 2.62 (s, 3H), 4.10 (s, 3H), 6.88 (d, 1H,  $J=7.7$  Hz), 6.93 (t, 1H,  $J=7.4$  Hz), 6.99 (m, 2H), 7.04 (app. t, 2H,  $J=7.7$  Hz), 7.08 (app. dt, 1H,  $J_1=7.6$  Hz,  $J_2=1.5$  Hz), 7.10-7.12 (m, 3H, 2 signals overlapping), 7.16 (dd, 1H,  $J_1=7.8$  Hz,  $J_2=1.5$  Hz), 7.19 (t, 1H,  $J=7.7$  Hz), 7.27 (d, 2H,  $J=8.0$  Hz), 7.60 (app. t, 1H,  $J=7.8$  Hz), 7.68 (bs, 1H), 8.25 (d, 1H,  $J=7.9$  Hz).  $^{13}\text{C}$  NMR ( $\text{CDCl}_3$ ):  $\delta_{\text{C}}$  (ppm) 22.27, 55.01, 119.33, 121.51, 123.43, 123.66, 126.79, 126.87, 127.82, 128.08, 128.32, 128.61, 129.10, 129.57, 133.50, 137.13, 137.50, 137.92, 143.03, 152.77, 156.18, 160.86, 164.34, 166.44, 169.42. FT-IR: wavenumber ( $\text{cm}^{-1}$ ) 1641 (m), 1596 (m), 1549 (s), 1468 (m), 1443 (m), 1383 (m), 1323 (s), 1271 (m), 1072 (m), 1040 (m), 880 (m), 799 (m), 750 (s), 692 (m). MS (ES-API),  $m/z$ : calcd for  $\text{C}_{30}\text{H}_{23}\text{ClN}_4\text{O}_2$ : 506.15; found: 507.2 [ $\text{M}+\text{H}^+$ ]. m.p. 112-114  $^{\circ}\text{C}$ .

• **2-Methoxy-4-methyl-N-phenyl-6-(6-(3-phenylthiophen-2-yl)pyridin-2-yl)pyrimidine-5-carboxamide (17o):**

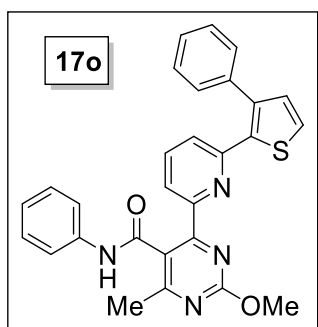

Beige solid. Yield: 71%.  $^1\text{H}$  NMR ( $\text{CDCl}_3$ ):  $\delta_{\text{H}}$  (ppm) 2.62 (s, 3H), 4.05 (s, 3H), 6.96 (d, 1H,  $J=5.1$  Hz), 6.98 (d, 1H,  $J=7.9$  Hz), 7.02 (t, 1H,  $J=7.4$  Hz), 7.12-7.22 (m, 5H, 3 signals overlapping), 7.27-7.31 (m, 3H, 2 signals overlapping), 7.45-7.53 (m, 3H, 2 signals overlapping), 7.97 (d, 1H,  $J=7.7$  Hz), 8.14 (bs, 1H).  $^{13}\text{C}$  NMR ( $\text{CDCl}_3$ ):  $\delta_{\text{C}}$  (ppm) 22.56, 55.02, 119.86, 121.60, 123.13, 123.64, 124.14, 127.06, 127.43, 128.60, 128.69, 128.99, 130.51, 136.62, 136.91, 137.95, 138.36, 140.21, 152.35, 153.94, 161.69, 164.09, 165.62, 169.97. FT-IR: wavenumber ( $\text{cm}^{-1}$ ) 1661 (m), 1597 (m), 1551 (s), 1472 (m), 1441 (m), 1377 (m), 1317 (s), 1258 (m), 1057 (m), 781 (s), 754 (s), 706 (m). MS (ES-API),  $m/z$ : calcd for  $\text{C}_{28}\text{H}_{22}\text{N}_4\text{O}_2\text{S}$ : 478.15; found: 479.1 [ $\text{M}+\text{H}^+$ ]. m.p. 131-133  $^{\circ}\text{C}$ .

• **4-(6-(2,4-Diphenylthiophen-3-yl)pyridin-2-yl)-2-methoxy-6-methyl-N-phenylpyrimidine-5-carboxamide (17p):**

Beige solid. Yield: 70%.  $^1\text{H}$  NMR ( $\text{CDCl}_3$ ):  $\delta_{\text{H}}$  (ppm) 2.54 (s, 3H), 4.05 (s, 3H), 6.89 (m, 2H), 7.01 (m, 2H), 7.03 (tt, 1H,  $J_1=6.8$  Hz,  $J_2=2.0$  Hz), 7.06 (dd, 1H,  $J_1=7.8$  Hz,  $J_2=0.9$  Hz), 7.08-7.20 (m, 11H, 7 signals overlapping), 7.50 (bs, 1H), 7.64 (app. t, 1H,  $J=7.8$  Hz), 8.13 (dd, 1H,  $J_1=7.8$  Hz,  $J_2=0.9$  Hz).  $^{13}\text{C}$  NMR ( $\text{CDCl}_3$ ):  $\delta_{\text{C}}$  (ppm) 22.34, 54.97, 120.35, 121.70, 121.93, 123.32, 124.24, 126.70, 127.38, 127.39, 127.90, 128.23, 128.64, 128.69,

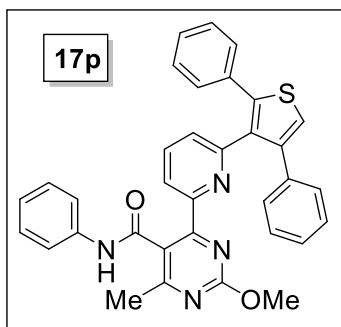

129.09, 133.84, 136.15, 136.33, 137.01, 137.40, 142.80, 143.51, 153.76, 154.81, 161.40, 164.19, 166.14, 169.18. FT-IR: wavenumber ( $\text{cm}^{-1}$ ) 1651 (s), 1599 (m), 1545 (s), 1468 (s), 1439 (s), 1373 (m), 1321 (s), 1285 (m), 1063 (m), 795 (m), 756 (s). MS (ES-API),  $m/z$ : calcd for  $\text{C}_{34}\text{H}_{26}\text{N}_4\text{O}_2\text{S}$ : 554.18; found: 555.1  $[\text{M}+\text{H}^+]$ . m.p. 122-124 °C.

• **2-Methoxy-4-methyl-N-phenyl-6-(6-(3-phenylbenzofuran-2-yl)pyridin-2-yl)pyrimidine-5-carboxamide (17q):**

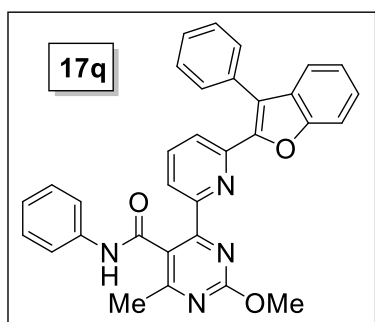

White solid. Yield: 53%.  $^1\text{H}$  NMR ( $\text{CDCl}_3$ ):  $\delta_{\text{H}}$  (ppm) 2.68 (s, 3H), 4.12 (s, 3H), 6.94 (t, 1H,  $J=7.4$  Hz), 7.05 (app. t, 2H,  $J=7.8$  Hz), 7.15 (d, 1H,  $J=8.1$  Hz), 7.24 (t, 1H,  $J=7.4$  Hz), 7.31 (app. t, 1H,  $J=8.0$  Hz), 7.34 (m, 2H), 7.39-7.43 (m, 4H, 3 signals overlapping), 7.44-7.46 (m, 3H, 2 signals overlapping), 7.70 (app. t, 1H,  $J=7.8$  Hz), 8.03 (d, 1H,  $J=7.8$  Hz), 8.21 (bs, 1H).  $^{13}\text{C}$  NMR ( $\text{CDCl}_3$ ):  $\delta_{\text{C}}$  (ppm) 22.62, 55.21, 111.85, 119.16, 119.85, 120.11, 120.35, 120.55, 122.98, 123.25, 123.71, 124.10, 124.37, 126.02, 128.14, 128.74, 128.80, 129.03, 129.25, 129.67, 131.81, 137.88, 138.01, 148.17, 154.42, 164.15, 165.43, 169.92. FT-IR: wavenumber ( $\text{cm}^{-1}$ ) 1657 (m), 1649 (m), 1599 (m), 1547 (s), 1491 (w), 1470 (m), 1441 (m), 1375 (m), 1319 (s), 1260 (m), 1236 (m), 1171 (m), 1088 (s), 880 (s), 795 (m), 750 (m), 729 (m). MS (ES-API),  $m/z$ : calcd for  $\text{C}_{32}\text{H}_{24}\text{N}_4\text{O}_3$ : 512.18; found: 513.2  $[\text{M}+\text{H}^+]$ . m.p. 111-113 °C.

• **4-(6-(2,4-Diphenylbenzofuran-3-yl)pyridin-2-yl)-2-methoxy-6-methyl-N-phenylpyrimidine-5-carboxamide (17r):**

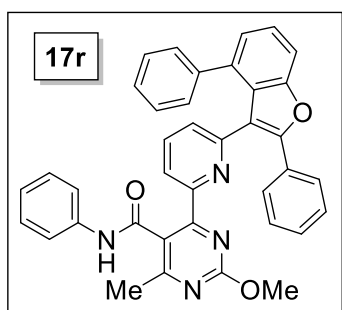

White solid. Yield: 71%.  $^1\text{H}$  NMR ( $\text{CDCl}_3$ ):  $\delta_{\text{H}}$  (ppm) 2.58 (s, 3H), 4.13 (s, 3H), 6.78-6.94 (m, 9H, signals overlapping), 6.98 (d, 2H,  $J=7.6$  Hz), 7.09 (dd, 1H,  $J_1=7.4$  Hz,  $J_2=0.8$  Hz), 7.20 (m, 3H, signals overlapping), 7.28 (dd, 2H,  $J_1=7.3$  Hz,  $J_2=1.8$  Hz), 7.34 (t, 1H,  $J=7.8$  Hz), 7.40 (t, 1H,  $J=7.8$  Hz), 7.48 (bs, 1H), 7.50 (d, 1H,  $J=8.2$  Hz), 8.04 (dd, 1H,  $J_1=7.9$  Hz,  $J_2=0.8$  Hz).  $^{13}\text{C}$  NMR ( $\text{CDCl}_3$ ):  $\delta_{\text{C}}$  (ppm) 22.32, 55.01, 110.04, 117.06, 119.16, 121.59, 123.61, 123.81, 124.18, 124.39, 126.25, 126.72, 127.02, 127.04, 127.12, 128.20, 128.24, 128.38, 128.66, 130.01, 136.23, 136.61, 137.37, 139.11, 152.08, 152.13, 153.71, 153.93, 161.38, 164.17, 166.22, 169.02. FT-IR: wavenumber ( $\text{cm}^{-1}$ ) 1651 (m), 1599 (m), 1537 (s), 1470 (m), 1441 (m), 1375 (m), 1315 (s), 1261 (m), 1225 (m), 1103 (m), 1069 (m), 795 (m),

743 (s). MS (ES-API), m/z: calcd for C<sub>38</sub>H<sub>28</sub>N<sub>4</sub>O<sub>3</sub>: 588.22; found: 589.2 [M+H<sup>+</sup>]. m.p. 109-111 °C.

• **Ethyl 4-(6-([1,1':3',1''-terphenyl]-2'-yl)pyridin-2-yl)-2-methoxy-6-methyl-pyrimidine-5-carboxylate (18a):**

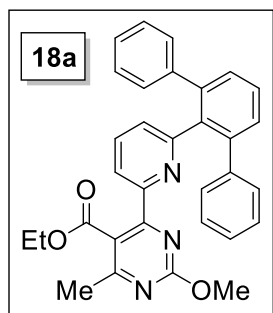

White solid. Yield: 58%. <sup>1</sup>H NMR (CDCl<sub>3</sub>): δ<sub>H</sub> (ppm) 1.07 (t, 3H, J=7.2 Hz), 2.49 (s, 3H), 3.87 (q, 2H, J=7.2 Hz), 4.07 (s, 3H), 6.87 (dd, 1H, J<sub>1</sub>=7.7 Hz, J<sub>2</sub>=0.9 Hz), 7.08 (tt, 2H, J<sub>1</sub>=7.1 Hz, J<sub>2</sub>=2.0 Hz), 7.12 (app. t, 4H, J=7.3 Hz), 7.16 (m, 4H), 7.42 (app. t, 1H, J=7.8 Hz), 7.44 (d, 2H, J=7.7 Hz), 7.54 (t, 1H, J=7.7 Hz), 8.10 (dd, 1H, J<sub>1</sub>=7.9 Hz, J<sub>2</sub>=0.9 Hz). <sup>13</sup>C NMR (CDCl<sub>3</sub>): δ<sub>C</sub> (ppm) 13.76, 22.11, 54.91, 61.12, 120.23, 120.29, 126.43, 127.46, 127.53, 128.15, 129.06, 129.81, 136.14, 138.14, 140.89, 141.86, 151.21,

157.89, 160.94, 164.17, 168.11, 168.60. FT-IR: wavenumber (cm<sup>-1</sup>) 1721 (s), 1547 (s), 1470 (m), 1375 (m), 1252 (s), 1198 (m), 1169 (m), 1078 (s), 772 (s). MS (ES-API), m/z: calcd for C<sub>32</sub>H<sub>27</sub>N<sub>3</sub>O<sub>3</sub>: 501.21; found: 502.2 [M+H<sup>+</sup>]. m.p. 82-84 °C.

• **Ethyl 2-methoxy-4-methyl-6-(6-(3-methyl-[1,1'-biphenyl]-2-yl)pyridin-2-yl)pyrimidine-5-carboxylate (18b):**

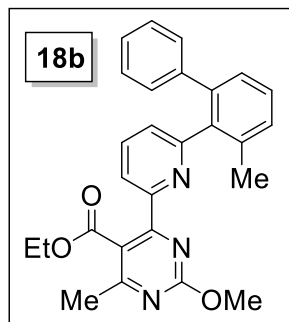

White solid. Yield: 56%. <sup>1</sup>H NMR (CDCl<sub>3</sub>): δ<sub>H</sub> (ppm) 1.04 (t, 3H, J=7.2 Hz), 2.15 (s, 3H), 2.52 (s, 3H), 3.83 (bd, 2H), 4.12 (s, 3H), 6.84 (dd, 1H, J<sub>1</sub>=7.7 Hz, J<sub>2</sub>=1.0 Hz), 7.06 (m, 2H), 7.10-7.16 (m, 3H, signals overlapping), 7.28 (d, 1H, J=7.8 Hz), 7.31 (d, 1H, J=7.4 Hz), 7.38 (app. t, 1H, J=7.6 Hz), 7.56 (app. t, 1H, J=7.8 Hz), 8.31 (dd, 1H, J<sub>1</sub>=7.9 Hz, J<sub>2</sub>=1.0 Hz). <sup>13</sup>C NMR (CDCl<sub>3</sub>): δ<sub>C</sub> (ppm) 13.63, 20.39, 22.08, 54.97, 61.37, 120.25, 120.34, 126.39, 126.94, 127.35, 127.76, 128.17, 129.15, 129.70,

136.93, 137.26, 138.78, 141.03, 141.16, 151.72, 158.30, 160.84, 164.39, 168.33, 169.05. FT-IR: wavenumber (cm<sup>-1</sup>) 1724 (s), 1551 (s), 1470 (s), 1379 (m), 1360 (m), 1265 (s), 1246 (m), 1225 (m), 1167 (m), 1094 (m), 1070 (s), 874 (m), 802 (m), 764 (m), 700 (m), 627 (m). MS (ES-API), m/z: calcd for C<sub>27</sub>H<sub>25</sub>N<sub>3</sub>O<sub>3</sub>: 439.19; found: 440.1 [M+H<sup>+</sup>]. m.p. 76-78 °C.

• **Ethyl 2-methoxy-4-methyl-6-(6-(4'-methyl-[1,1':3',1''-terphenyl]-2'-yl)pyridin-2-yl)pyrimidine-5-carboxylate (18c):**

White solid. Yield: 61%. <sup>1</sup>H NMR (CDCl<sub>3</sub>): δ<sub>H</sub> (ppm) 1.11 (t, 3H, J=7.1 Hz), 2.17 (s, 3H), 2.50 (s, 3H), 3.88 (q, 2H, J=7.1 Hz), 4.05 (s, 3H), 6.78 (dd, 1H, J<sub>1</sub>=7.8 Hz, J<sub>2</sub>=0.8 Hz), 6.95 (t, 1H, J=6.7 Hz), 7.01 (t, 2H, J=7.1 Hz), 7.08 (d, 2H, J=7.5 Hz), 7.11 (t, 2H, J=7.0 Hz), 7.16

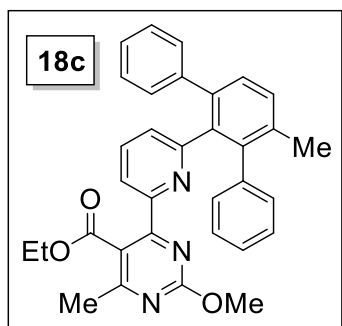

(d, 2H,  $J=7.5$  Hz), 7.21 (t, 1H,  $J=6.5$  Hz), 7.33 (t, 1H,  $J=7.9$  Hz), 7.36 (d, 1H,  $J=8.0$  Hz), 7.41 (d, 1H,  $J=8.0$  Hz), 8.00 (dd, 1H,  $J_1=8.0$  Hz,  $J_2=0.8$  Hz).  $^{13}\text{C}$  NMR ( $\text{CDCl}_3$ ):  $\delta_{\text{C}}$  (ppm) 13.76, 20.76, 22.12, 54.87, 61.13, 119.87, 120.17, 126.17, 126.26, 127.05, 127.15, 127.53, 127.57, 128.64, 129.22, 129.69, 129.80, 130.84, 138.68, 138.83, 139.47, 140.93, 141.64, 150.88, 158.15, 161.00, 164.18, 168.05, 168.74. FT-IR: wavenumber ( $\text{cm}^{-1}$ ) 1721 (s), 1549 (s), 1468 (m), 1379 (m), 1360 (m), 1250 (s), 1192 (m), 1074 (s), 787 (s). MS (ES-API),  $m/z$ : calcd for  $\text{C}_{33}\text{H}_{29}\text{N}_3\text{O}_3$ : 515.22; found: 516.2  $[\text{M}+\text{H}^+]$ . m.p. 84-86 °C.

• **Ethyl 2-methoxy-4-methyl-6-(6-(5'-phenyl-[1,1':3',1''-terphenyl]-2'-yl)pyridin-2-yl)pyrimidine-5-carboxylate (18d):**

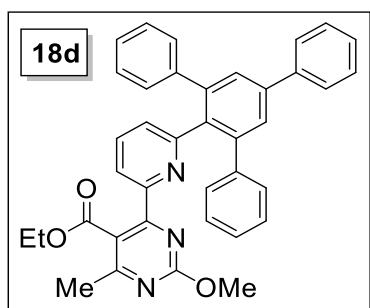

White solid. Yield: 63%.  $^1\text{H}$  NMR ( $\text{CDCl}_3$ ):  $\delta_{\text{H}}$  (ppm) 1.08 (t, 3H,  $J=7.2$  Hz), 2.49 (s, 3H), 3.92 (q, 2H,  $J=7.2$  Hz), 4.07 (s, 3H), 6.91 (dd, 1H,  $J_1=7.7$  Hz,  $J_2=0.9$  Hz), 7.11 (tt, 2H,  $J_1=7.0$  Hz,  $J_2=2.0$  Hz), 7.15 (app. t, 4H,  $J=7.2$  Hz), 7.22 (m, 4H), 7.40 (tt, 1H,  $J_1=7.4$  Hz,  $J_2=1.5$  Hz), 7.44 (app. t, 1H,  $J=7.8$  Hz), 7.49 (app. t, 2H,  $J=7.7$  Hz), 7.70 (s, 2H), 7.73 (m, 2H), 8.12 (dd, 1H,  $J_1=7.9$  Hz,  $J_2=0.9$  Hz).  $^{13}\text{C}$  NMR ( $\text{CDCl}_3$ ):  $\delta_{\text{C}}$  (ppm) 13.77, 22.12, 54.93, 61.21, 120.26, 120.37, 126.58, 127.18, 127.54, 127.62, 127.63, 127.72, 128.92, 129.83, 136.20, 137.18, 140.34, 140.87, 140.89, 142.45, 151.36, 157.75, 161.01, 164.17, 168.12, 168.62. FT-IR: wavenumber ( $\text{cm}^{-1}$ ) 1724 (s), 1549 (s), 1474 (m), 1362 (m), 1358 (m), 1248 (s), 1175 (m), 1076 (m), 1053 (m), 824 (m), 799 (s), 764 (s). MS (ES-API),  $m/z$ : calcd for  $\text{C}_{38}\text{H}_{31}\text{N}_3\text{O}_3$ : 577.24; found: 578.2  $[\text{M}+\text{H}^+]$ . m.p. 142-144 °C.

• **Ethyl 4-(6-(3-butoxy-[1,1'-biphenyl]-2-yl)pyridin-2-yl)-2-methoxy-6-methylpyrimidine-5-carboxylate (18e):**

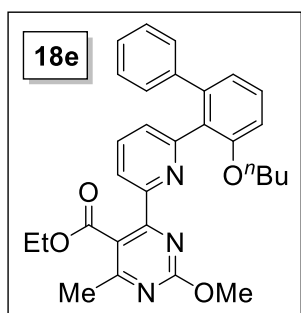

White wax. Yield: 58%.  $^1\text{H}$  NMR ( $\text{CDCl}_3$ ):  $\delta_{\text{H}}$  (ppm) 0.73 (t, 3H,  $J=7.5$  Hz), 1.01 (t, 3H,  $J=7.1$  Hz), 1.17 (app. sextet, 2H,  $J=7.5$  Hz), 1.52 (app. quintet, 2H,  $J=7.0$  Hz), 2.50 (s, 3H), 3.83 (q, 2H,  $J=7.1$  Hz), 3.94 (t, 2H,  $J=6.5$  Hz), 4.10 (s, 3H), 6.98 (d, 1H,  $J=8.1$  Hz), 7.02 (d, 1H,  $J=7.7$  Hz), 7.05 (d, 1H,  $J=7.7$  Hz), 7.09 (m, 1H), 7.10-7.14 (m, 4H, signals overlapping), 7.41 (app. t, 1H,  $J=7.9$  Hz), 7.60 (app. t, 1H,  $J=7.8$  Hz), 8.24 (d, 1H,  $J=7.9$  Hz).  $^{13}\text{C}$  NMR ( $\text{CDCl}_3$ ):  $\delta_{\text{C}}$  (ppm) 13.59, 13.60, 18.94, 22.12, 31.01, 54.89, 61.09, 68.54, 111.09, 120.24, 120.30, 122.07, 126.43, 127.25, 127.59, 129.09, 129.32, 129.66, 136.29, 140.52, 142.56, 151.79, 155.90, 157.09, 161.47,



164.27, 168.14, 168.55. FT-IR: wavenumber ( $\text{cm}^{-1}$ ) 2800 (m), 1721 (s), 1553 (s), 1462 (m), 1360 (m), 1269 (s), 1225 (s), 1179 (m), 1072 (m), 1007 (m), 799 (m), 762 (s). MS (ES-API),  $m/z$ : calcd for  $\text{C}_{30}\text{H}_{31}\text{N}_3\text{O}_4$ : 497.23; found: 498.2  $[\text{M}+\text{H}^+]$ .

• **Ethyl 2-methoxy-4-(6-(5'-methoxy-[1,1':3',1''-terphenyl]-2'-yl)pyridin-2-yl)-6-methylpyrimidine-5-carboxylate (18g):**

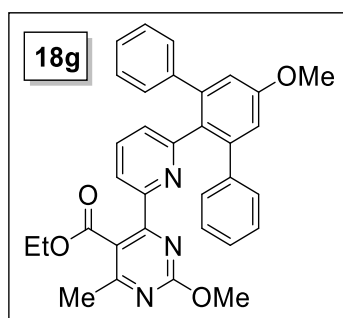

White solid. Yield: 56%.  $^1\text{H}$  NMR ( $\text{CDCl}_3$ ):  $\delta_{\text{H}}$  (ppm) 1.12 (t, 3H,  $J=7.2$  Hz), 2.49 (s, 3H), 3.92 (s, 3H), 3.94 (q, 2H,  $J=7.2$  Hz), 4.06 (s, 3H), 6.83 (dd, 1H,  $J_1=7.7$  Hz,  $J_2=1.0$  Hz), 6.99 (s, 2H), 7.08 (tt, 2H,  $J_1=7.0$  Hz,  $J_2=2.0$  Hz), 7.12 (app. t, 4H,  $J=7.3$  Hz), 7.17 (m, 4H), 7.39 (app. t, 1H,  $J=7.8$  Hz), 8.07 (dd, 1H,  $J_1=7.9$  Hz,  $J_2=1.0$  Hz).  $^{13}\text{C}$  NMR ( $\text{CDCl}_3$ ):  $\delta_{\text{C}}$  (ppm) 13.81, 22.14, 54.90, 55.50, 61.17, 114.42, 120.12, 120.18, 126.55, 127.54, 127.93, 129.70, 131.25, 136.04, 140.91, 143.31, 151.23, 157.83, 158.81, 161.01, 164.19, 168.11, 168.63. FT-IR: wavenumber ( $\text{cm}^{-1}$ ) 1711 (s), 1553 (s), 1470 (m), 1373 (m), 1292 (m), 1244 (s), 1182 (m), 1076 (m), 1030 (m), 793 (s). MS (ES-API),  $m/z$ : calcd for  $\text{C}_{33}\text{H}_{29}\text{N}_3\text{O}_4$ : 531.22; found: 532.2  $[\text{M}+\text{H}^+]$ . m.p. 76-78  $^{\circ}\text{C}$ .

• **Ethyl 4-(6-(3-fluoro-[1,1'-biphenyl]-2-yl)pyridin-2-yl)-2-methoxy-6-methylpyrimidine-5-carboxylate (18j):**

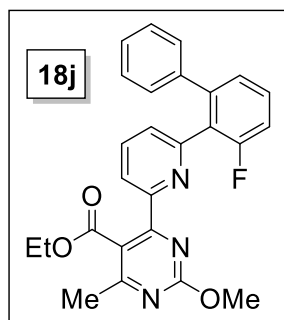

White solid. Yield: 53%.  $^1\text{H}$  NMR ( $\text{CDCl}_3$ ):  $\delta_{\text{H}}$  (ppm) 1.12 (t, 3H,  $J=7.2$  Hz), 2.53 (s, 3H), 3.97 (q, 2H,  $J=7.2$  Hz), 4.10 (s, 3H), 6.96 (dd, 1H,  $J_1=7.7$  Hz,  $J_2=1.0$  Hz), 7.09 (m, 2H), 7.15-7.17 (m, 3H, signals overlapping), 7.19 (app. dt, 1H,  $J_1=8.6$  Hz,  $J_2=1.0$  Hz), 7.26 (dd, 1H,  $J_1=7.6$  Hz,  $J_2=1.0$  Hz), 7.46 (dt, 1H,  $J_1=8.1$  Hz,  $J_2=5.6$  Hz), 7.61 (app. t, 1H,  $J=7.8$  Hz), 8.28 (dd, 1H,  $J_1=7.9$  Hz,  $J_2=1.0$  Hz).  $^{13}\text{C}$  NMR ( $\text{CDCl}_3$ ):  $\delta_{\text{C}}$  (ppm) 13.63, 22.21, 55.00, 61.28, 114.39 (d,  $J=22.9$  Hz), 120.24, 121.22, 125.56 (d,  $J=2.8$  Hz), 127.06, 127.31, 127.44, 127.96, 129.63, 129.73 (d,  $J=8.7$  Hz), 136.81, 139.35 (d,  $J=2.8$  Hz), 143.45 (d,  $J=2.8$  Hz), 152.60, 153.17, 160.28 (d,  $J=249.1$  Hz), 161.32, 164.34, 168.53, 168.58. FT-IR: wavenumber ( $\text{cm}^{-1}$ ) 1726 (m), 1612 (w), 1551 (s), 1462 (s), 1433 (w), 1379 (m), 1360 (m), 1288 (m), 1265 (s), 1246 (m), 1198 (w), 1169 (m), 1072 (s), 889 (m), 829 (m), 800 (m), 760 (m), 677 (m). MS (ES-API),  $m/z$ : calcd for  $\text{C}_{26}\text{H}_{22}\text{FN}_3\text{O}_3$ : 443.16; found: 444.1  $[\text{M}+\text{H}^+]$ . m.p. 78-80  $^{\circ}\text{C}$ .

• **Ethyl 4-(6-(4'-fluoro-[1,1':3',1''-terphenyl]-2'-yl)pyridin-2-yl)-2-methoxy-6-methylpyrimidine-5-carboxylate (18k):**

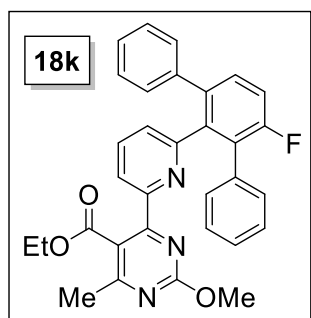

White solid. Yield: 55%.  $^1\text{H}$  NMR ( $\text{CDCl}_3$ ):  $\delta_{\text{H}}$  (ppm) 1.15 (t, 3H,  $J=6.6$  Hz), 2.51 (s, 3H), 3.95 (q, 2H,  $J=6.6$  Hz), 4.06 (s, 3H), 6.82 (dd, 1H,  $J_1=7.0$  Hz,  $J_2=0.8$  Hz), 7.06-7.22 (m, 10H, signals overlapping), 7.31 (t, 1H,  $J=8.5$  Hz), 7.42 (m, 2H, signals overlapping), 8.08 (dd, 1H,  $J_1=7.6$  Hz,  $J_2=0.8$  Hz).  $^{13}\text{C}$  NMR ( $\text{CDCl}_3$ ):  $\delta_{\text{C}}$  (ppm) 13.78, 22.16, 54.90, 61.14, 115.37 (d,  $J=23.0$  Hz), 120.17, 120.47, 126.57, 127.06, 127.08, 127.46, 127.66, 129.41 (d,  $J=16.5$  Hz), 129.78, 130.36 (d,  $J=7.8$  Hz), 130.61, 133.47, 136.21, 137.70 (d,  $J=3.4$  Hz), 140.04, 140.60 (d,  $J=2.5$  Hz), 151.31, 156.61 (d,  $J=2.5$  Hz), 158.92 (d,  $J=246.9$  Hz), 160.78, 164.22, 168.19, 168.65. FT-IR: wavenumber ( $\text{cm}^{-1}$ ) 1721 (s), 1547 (s), 1472 (m), 1377 (m), 1252 (s), 1190 (m), 1070 (s), 995 (m), 783 (s), 735 (m). MS (ES-API),  $m/z$ : calcd for  $\text{C}_{32}\text{H}_{26}\text{FN}_3\text{O}_3$ : 519.20; found: 520.1 [ $\text{M}+\text{H}^+$ ]. m.p. 106-108 °C.

• **4-(6-(4'-isopropyl-3-methyl-[1,1'-biphenyl]-2'-yl)pyridin-2-yl)-2-methoxy-6-methyl-N-phenylpyrimidine-5-carboxamide (20a):**

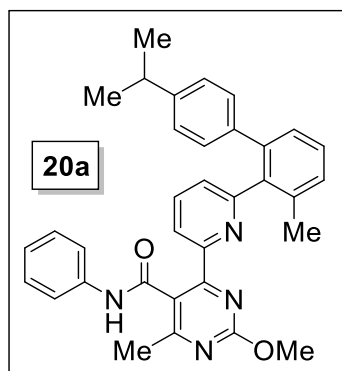

Beige solid. Yield: 76%.  $^1\text{H}$  NMR ( $\text{CDCl}_3$ ):  $\delta_{\text{H}}$  (ppm) 1.13 (d, 6H,  $J=6.8$  Hz), 2.03 (s, 3H), 2.64 (s, 3H), 2.75 (hept, 1H,  $J=6.8$  Hz), 4.11 (s, 3H), 6.80 (d, 2H,  $J=8.2$  Hz), 6.83 (dd, 1H,  $J_1=7.7$  Hz,  $J_2=0.8$  Hz), 6.88-6.94 (m, 3H, 2 signals overlapping), 6.98-7.04 (m, 3H, 2 signals overlapping), 7.11-7.15 (m, 3H, 2 signals overlapping), 7.24 (t, 1H,  $J=7.7$  Hz), 7.54 (t, 1H,  $J=7.8$  Hz), 7.72 (bs, 1H), 8.20 (dd, 1H,  $J_1=7.9$  Hz,  $J_2=0.8$  Hz).  $^{13}\text{C}$  NMR ( $\text{CDCl}_3$ ):  $\delta_{\text{C}}$  (ppm) 20.43, 22.37, 23.87, 33.54, 55.01, 119.81, 121.02, 123.21, 123.99, 125.65, 127.22, 127.29, 127.94, 128.70, 129.05, 129.50, 136.65, 136.87, 137.50, 138.64, 138.74, 141.00, 146.77, 152.86, 158.91, 161.38, 164.35, 166.38, 169.58. FT-IR: wavenumber ( $\text{cm}^{-1}$ ) 1685 (m), 1654 (m), 1599 (m), 1555 (s), 1471 (s), 1441 (m), 1379 (s), 1316 (s), 1263 (m), 1070 (m), 840 (w), 799 (m), 751 (s). MS (ES-API),  $m/z$ : calcd for  $\text{C}_{34}\text{H}_{32}\text{N}_4\text{O}_2$ : 528.25; found: 529.2 [ $\text{M}+\text{H}^+$ ]. m.p. 99-101 °C.

• **4-(6-(4'-(tert-butyl)-3-methyl-[1,1'-biphenyl]-2'-yl)pyridin-2-yl)-2-methoxy-6-methyl-N-phenylpyrimidine-5-carboxamide (20b):**

Beige solid. Yield: 79%.  $^1\text{H}$  NMR ( $\text{CDCl}_3$ ):  $\delta_{\text{H}}$  (ppm) 1.20 (s, 9H), 2.03 (s, 3H), 2.61 (s, 3H), 4.06 (s, 3H), 6.79-6.87 (m, 3H, 2 signals overlapping), 6.91 (t, 1H,  $J=7.5$  Hz), 6.97-7.03 (m, 3H, 2 signals overlapping), 7.07 (d, 2H,  $J=8.3$  Hz), 7.10-7.18 (m, 3H, 2 signals

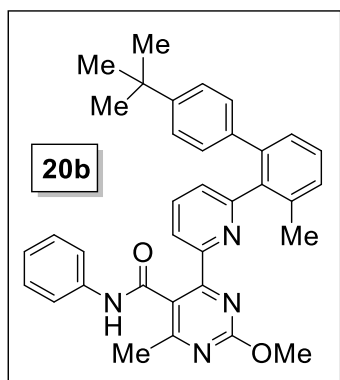

overlapping), 7.24 (app. t, 1H,  $J=7.6$  Hz), 7.53 (app. t, 1H,  $J=7.8$  Hz), 7.87 (bs, 1H), 8.21 (d, 1H,  $J=7.9$  Hz).  $^{13}\text{C}$  NMR ( $\text{CDCl}_3$ ):  $\delta_{\text{C}}$  (ppm) 20.44, 22.32, 31.23, 34.27, 54.94, 119.75, 120.93, 123.14, 123.95, 124.50, 127.25, 127.28, 127.92, 128.65, 129.01, 129.21, 136.61, 136.85, 137.56, 138.34, 138.60, 140.86, 149.02, 152.70, 158.89, 161.26, 164.24, 166.37, 169.49. FT-IR: wavenumber ( $\text{cm}^{-1}$ ) 1669 (m), 1600 (m), 1559 (s), 1500 (m), 1470 (m), 1441 (m), 1381 (s), 1316 (s), 1263 (m), 1070 (w), 839 (w), 799 (m),

757 (s). MS (ES-API),  $m/z$ : calcd for  $\text{C}_{35}\text{H}_{34}\text{N}_4\text{O}_2$ : 542.27; found: 543.1  $[\text{M}+\text{H}^+]$ . m.p. 109-111  $^{\circ}\text{C}$ .

• **2-Methoxy-4-methyl-6-(6-(2-methyl-6-(naphthalen-1-yl)phenyl)pyridin-2-yl)-*N*-phenylpyrimidine-5-carboxamide (20c):**

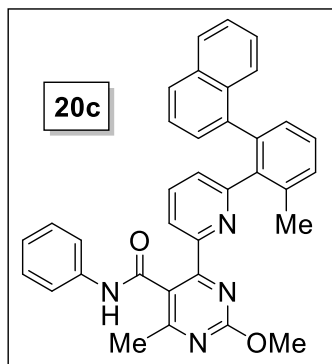

Colorless wax. Yield: 47%.  $^1\text{H}$  NMR ( $\text{CDCl}_3$ ):  $\delta_{\text{H}}$  (ppm) 2.14 (s, 3H), 2.60 (s, 3H), 4.01 (s, 3H), 6.51-6.91 (bs, 2H, 2 signals overlapping), 6.98 (app. t, 1H,  $J=6.8$  Hz), 7.05-7.15 (m, 4H, signals overlapping), 7.18-7.26 (m, 3H, signals overlapping), 7.27-7.43 (m, 4H, signals overlapping), 7.57 (d, 1H,  $J=8.0$  Hz), 7.72 (bs, 2H, 2 signals overlapping), 7.92 (bs, 1H), 8.01 (bs, 1H).  $^{13}\text{C}$  NMR ( $\text{CDCl}_3$ ):  $\delta_{\text{C}}$  (ppm) 20.59, 22.35, 54.91, 119.82, 121.03, 123.01, 124.10, 124.85, 125.35, 125.65, 126.21, 126.94, 127.57, 127.99, 128.23,

128.41, 128.76, 128.82, 129.57, 132.35, 133.18, 136.53, 137.19, 137.71, 138.62, 139.17, 139.58, 152.55, 158.16, 160.84, 164.16, 166.09, 169.63. FT-IR: wavenumber ( $\text{cm}^{-1}$ ) 1656 (m), 1599 (m), 1553 (s), 1499 (w), 1470 (m), 1443 (m), 1381 (m), 1317 (s), 1265 (m), 1163 (w), 1084 (s), 1047 (s), 995 (w), 880 (m), 799 (m), 779 (m), 754 (m), 691 (m). MS (ES-API),  $m/z$ : calcd for  $\text{C}_{35}\text{H}_{28}\text{N}_4\text{O}_2$ : 536.22; found: 537.2  $[\text{M}+\text{H}^+]$ . m.p. 108-110  $^{\circ}\text{C}$ .

• **4-(6-(4'-(Dimethylamino)-3-methyl-[1,1'-biphenyl]-2-yl)pyridin-2-yl)-2-methoxy-6-methyl-*N*-phenylpyrimidine-5-carboxamide (20d):**

Yellow solid. Yield: 89%.  $^1\text{H}$  NMR ( $\text{CDCl}_3$ ):  $\delta_{\text{H}}$  (ppm) 2.01 (s, 3H), 2.64 (s, 3H), 2.83 (s, 6H), 4.11 (s, 3H), 6.43 (d, 2H,  $J=8.5$  Hz), 6.76 (d, 2H,  $J=8.5$  Hz), 6.87 (d, 1H,  $J=7.7$  Hz), 6.91 (t, 1H,  $J=7.3$  Hz), 6.96-7.02 (m, 3H, 2 signals overlapping), 7.09-7.15 (m, 3H, 2 signals overlapping), 7.22 (t, 1H,  $J=7.6$  Hz), 7.57 (t, 1H,  $J=7.8$  Hz), 7.77 (bs, 1H), 8.19 (d, 1H,  $J=7.9$  Hz).  $^{13}\text{C}$  NMR ( $\text{CDCl}_3$ ):  $\delta_{\text{C}}$  (ppm) 20.46, 22.36, 40.43, 54.99, 111.80, 119.84, 120.90, 123.23, 123.99, 127.25, 127.30, 127.94, 128.45, 128.66, 129.48, 130.36, 136.76, 136.79, 137.47, 138.49, 141.01, 148.86, 152.88, 159.35, 161.51, 164.35,

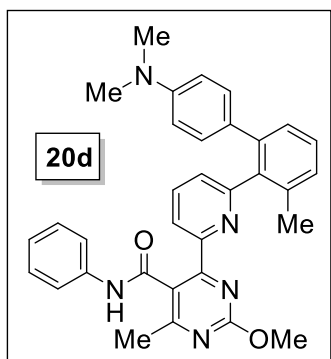

166.44, 169.53. FT-IR: wavenumber ( $\text{cm}^{-1}$ ) 1683 (m), 1654 (m), 1599 (m), 1557 (s), 1471 (m), 1444 (m), 1379 (s), 1316 (m), 1263 (m), 1070 (w), 799 (w), 754 (s). MS (ES-API),  $m/z$ : calcd for  $\text{C}_{33}\text{H}_{31}\text{N}_5\text{O}_2$ : 529.25; found: 530.1  $[\text{M}+\text{H}^+]$ . m.p. 124-126 °C.

• **4-(6-(4'-(Diethylamino)-3-methyl-[1,1'-biphenyl]-2-yl)pyridin-2-yl)-2-methoxy-6-methyl-*N*-phenylpyrimidine-5-carboxamide (20e):**

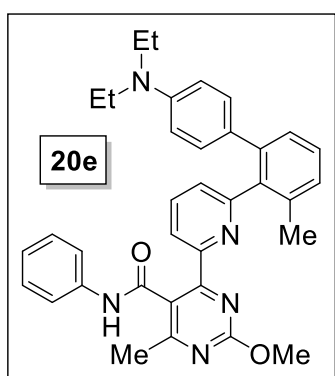

Dark yellow solid. Yield: 84%.  $^1\text{H}$  NMR ( $\text{CDCl}_3$ ):  $\delta_{\text{H}}$  (ppm) 1.06 (t, 6H,  $J=7.1$  Hz), 2.00 (s, 3H), 2.64 (s, 3H), 3.23 (q, 4H,  $J=7.1$  Hz), 4.11 (s, 3H), 6.37 (d, 2H,  $J=8.6$  Hz), 6.73 (d, 2H,  $J=8.6$  Hz), 6.89 (d, 1H,  $J=7.7$  Hz), 6.92 (t, 1H,  $J=7.4$  Hz), 6.94 (d, 1H,  $J=7.4$  Hz), 7.00 (app. t, 2H,  $J=7.8$  Hz), 7.11-7.15 (m, 3H, 2 signals overlapping), 7.21 (app. t, 1H,  $J=7.5$  Hz), 7.59 (app. t, 1H,  $J=7.8$  Hz), 7.77 (bs, 1H), 8.20 (d, 1H,  $J=7.9$  Hz).  $^{13}\text{C}$  NMR ( $\text{CDCl}_3$ ):  $\delta_{\text{C}}$  (ppm) 12.53, 20.50, 22.38, 44.12, 54.96, 111.04, 119.89, 120.86, 123.20, 124.01, 127.24, 127.36, 127.93, 128.25, 128.28, 128.65, 130.57, 136.74, 136.80, 137.44, 138.37, 141.09, 146.17, 152.85, 159.44, 161.53, 164.33, 166.47, 169.52. FT-IR: wavenumber ( $\text{cm}^{-1}$ ) 1683 (m), 1653 (m), 1599 (m), 1559 (s), 1544 (m), 1498 (w), 1472 (m), 1380 (s), 1317 (s), 1261 (m), 1070 (w), 799 (w), 756 (s). MS (ES-API),  $m/z$ : calcd for  $\text{C}_{35}\text{H}_{35}\text{N}_5\text{O}_2$ : 557.28; found: 558.2  $[\text{M}+\text{H}^+]$ . m.p. 129-131 °C.

• **2-Methoxy-4-methyl-6-(6-(3-methyl-3'-nitro-[1,1'-biphenyl]-2-yl)pyridin-2-yl)-*N*-phenylpyrimidine-5-carboxamide (20f):**

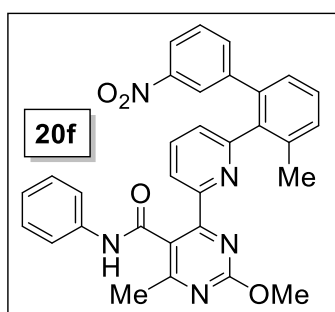

Beige solid. Yield: 59%.  $^1\text{H}$  NMR ( $\text{CDCl}_3$ ):  $\delta_{\text{H}}$  (ppm) 2.13 (s, 3H), 2.63 (s, 3H), 4.11 (s, 3H), 6.81 (d, 1H,  $J=7.7$  Hz), 6.84 (t, 1H,  $J=7.0$  Hz), 6.92 (app. t, 2H,  $J=7.4$  Hz), 7.04 (d, 1H,  $J=7.5$  Hz), 7.11 (d, 2H,  $J=7.8$  Hz), 7.24 (app. t, 1H,  $J=7.8$  Hz), 7.25 (d, 1H,  $J=7.5$  Hz), 7.32 (d, 1H,  $J=7.7$  Hz), 7.34 (app. t, 1H,  $J=7.5$  Hz), 7.57 (app. t, 1H,  $J=7.8$  Hz), 7.58 (bs, 1H), 7.71 (bs, 1H), 7.87 (d, 1H,  $J=7.9$  Hz), 8.31 (d, 1H,  $J=7.9$  Hz).  $^{13}\text{C}$  NMR ( $\text{CDCl}_3$ ):  $\delta_{\text{C}}$  (ppm) 20.36, 22.23, 55.00, 119.58, 121.12, 121.14, 122.80, 123.83, 124.74, 126.83, 126.86, 128.29, 128.56, 128.69, 130.19, 135.39, 137.17, 137.41, 137.60, 138.30, 138.85, 142.91, 147.09, 152.83, 157.97, 160.50, 164.36, 166.41, 169.66. FT-IR: wavenumber ( $\text{cm}^{-1}$ ) 1685 (m), 1656 (m),

1599 (m), 1558 (s), 1529 (s), 1470 (m), 1441 (m), 1376 (m), 1351 (s), 1316 (m), 1247 (m), 1070 (m), 799 (m), 756 (s). MS (ES-API), m/z: calcd for C<sub>31</sub>H<sub>25</sub>N<sub>5</sub>O<sub>4</sub>: 531.19; found: 532.1 [M+H<sup>+</sup>]. m.p. 155-157 °C.

• **2-Methoxy-4-methyl-6-(6-(3-methyl-4'-nitro-[1,1'-biphenyl]-2-yl)pyridin-2-yl)-N-phenylpyrimidine-5-carboxamide (20g):**

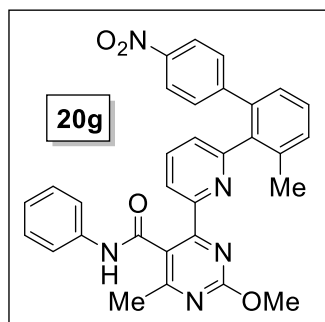

Pale yellow solid. Yield: 58%. <sup>1</sup>H NMR (CDCl<sub>3</sub>): δ<sub>H</sub> (ppm) 2.02 (s, 3H), 2.62 (s, 3H), 4.09 (s, 3H), 6.83 (dd, 1H, J<sub>1</sub>=7.7 Hz, J<sub>2</sub>=0.8 Hz), 6.91 (t, 1H, J=7.2 Hz), 7.00 (app. t, 2H, J=8.0 Hz), 7.04 (d, 2H, J=9.0 Hz), 7.08 (d, 1H, J=7.5 Hz), 7.13 (m, 3H, 2 signals overlapping), 7.30 (app. t, 1H, J=7.7 Hz), 7.59 (app. t, 1H, J=7.8 Hz), 7.67 (bs, 1H), 7.90 (d, 2H, J=8.8 Hz), 8.25 (dd, 1H, J<sub>1</sub>=7.9 Hz, J<sub>2</sub>=0.8 Hz). <sup>13</sup>C NMR (CDCl<sub>3</sub>): δ<sub>C</sub> (ppm) 20.30, 22.26, 55.02, 119.44, 121.36, 122.84, 123.07, 123.98, 126.84, 126.87, 128.25, 128.74, 130.40, 130.42, 137.16, 137.33, 137.59, 138.59, 138.76, 146.28, 148.29, 153.11, 157.93, 160.99, 164.38, 166.34, 169.44. FT-IR: wavenumber (cm<sup>-1</sup>) 1686 (m), 1656 (m), 1599 (m), 1560 (s), 1528 (s), 1468 (m), 1441 (m), 1378 (m), 1351 (s), 1316 (m), 1247 (w), 1070 (m), 799 (m), 757 (s), 738 (m). MS (ES-API), m/z: calcd for C<sub>31</sub>H<sub>25</sub>N<sub>5</sub>O<sub>4</sub>: 531.19; found: 532.1 [M+H<sup>+</sup>]. m.p. 139-141 °C.

• **4-(6-(4'-Fluoro-3-methyl-[1,1'-biphenyl]-2-yl)pyridin-2-yl)-2-methoxy-6-methyl-N-phenylpyrimidine-5-carboxamide (20h):**

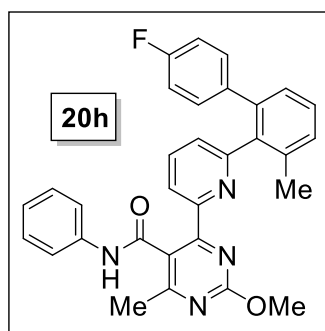

Beige solid. Yield: 70%. <sup>1</sup>H NMR (CDCl<sub>3</sub>): δ<sub>H</sub> (ppm) 2.01 (s, 3H), 2.61 (s, 3H), 4.08 (s, 3H), 6.73 (app. t, 2H, J=8.7 Hz), 6.83 (m, 3H, 2 signals overlapping), 6.92 (t, 1H, J=7.3 Hz), 7.01 (app. t, 2H, J=7.7 Hz), 7.05 (d, J=7.7 Hz), 7.07 (d, J=7.5 Hz), 7.13 (d, 2H, J=8.1 Hz), 7.25 (app. t, 1H, J=7.6 Hz), 7.57 (app. t, 1H, J=7.8 Hz), 7.76 (bs, 1H), 8.22 (dd, 1H, J<sub>1</sub>=7.9 Hz, J<sub>2</sub>=0.8 Hz). <sup>13</sup>C NMR (CDCl<sub>3</sub>): δ<sub>C</sub> (ppm) 20.39, 22.29, 54.97, 114.45 (d, J=21.1 Hz), 119.59, 121.00, 123.09, 123.94, 127.05, 127.16, 127.99, 128.69, 129.32, 131.12 (d, J=8.2 Hz), 136.83, 136.94, 137.31 (d, J=3.6 Hz), 137.58, 138.68, 139.92, 152.88 (d, J=3.9 Hz), 158.62, 161.16, 161.47 (d, J=245.4 Hz), 164.30, 166.31, 169.47. FT-IR: wavenumber (cm<sup>-1</sup>) 1663 (m), 1655 (m), 1600 (m), 1558 (s), 1508 (m), 1500 (m), 1471 (m), 1442 (m), 1380 (s), 1316 (s), 1222 (m), 1158 (m), 1068 (m), 840 (m), 798 (m), 756 (s). MS (ES-API), m/z: calcd for C<sub>31</sub>H<sub>25</sub>FN<sub>4</sub>O<sub>2</sub>: 504.20; found: 505.1 [M+H<sup>+</sup>]. m.p. 108-110 °C.

• **4-(6-(4'-Chloro-3-methyl-[1,1'-biphenyl]-2-yl)pyridin-2-yl)-2-methoxy-6-methyl-N-phenylpyrimidine-5-carboxamide (20i):**

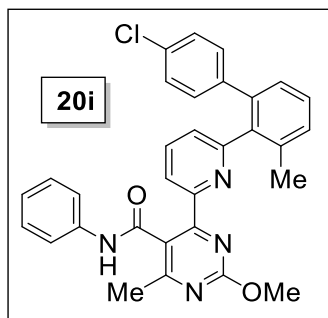

Beige solid. Yield: 66%.  $^1\text{H}$  NMR ( $\text{CDCl}_3$ ):  $\delta_{\text{H}}$  (ppm) 2.01 (s, 3H), 2.62 (s, 3H), 4.10 (s, 3H), 6.79 (d, 2H,  $J=8.3$  Hz), 6.83 (d, 1H,  $J=7.7$  Hz), 6.92 (t, 1H,  $J=7.5$  Hz), 7.00 (app. t, 2H,  $J=7.6$  Hz), 7.01 (d, 2H,  $J=8.3$  Hz), 7.06 (d, 1H,  $J=7.6$  Hz), 7.07 (d, 1H,  $J=7.6$  Hz), 7.12 (d, 2H,  $J=7.7$  Hz), 7.26 (t, 1H,  $J=7.6$  Hz), 7.59 (t, 1H,  $J=7.8$  Hz), 7.68 (bs, 1H), 8.23 (d, 1H,  $J=7.9$  Hz).  $^{13}\text{C}$  NMR ( $\text{CDCl}_3$ ):  $\delta_{\text{C}}$  (ppm) 20.40, 22.33, 55.00, 119.58, 121.14, 123.12, 123.98, 127.04, 127.08, 127.77, 128.07, 128.72, 129.52, 130.87, 132.37, 136.97, 137.05, 137.54, 138.59, 139.72, 139.81, 152.97, 158.49, 161.22, 164.38, 166.33, 169.51. FT-IR: wavenumber ( $\text{cm}^{-1}$ ) 1685 (m), 1655 (m), 1600 (m), 1558 (s), 1543 (m), 1472 (m), 1458 (m), 1376 (s), 1318 (s), 1263 (w), 1091 (w), 1071 (w), 834 (w), 799 (m), 756 (s). MS (ES-API),  $m/z$ : calcd for  $\text{C}_{31}\text{H}_{25}\text{ClN}_4\text{O}_2$ : 520.17; found: 521.1 [ $\text{M}+\text{H}^+$ ]. m.p. 112-114  $^{\circ}\text{C}$ .

• **4-(6-(2'-Bromo-3-methyl-[1,1'-biphenyl]-2-yl)pyridin-2-yl)-2-methoxy-6-methyl-N-phenylpyrimidine-5-carboxamide (20j):**

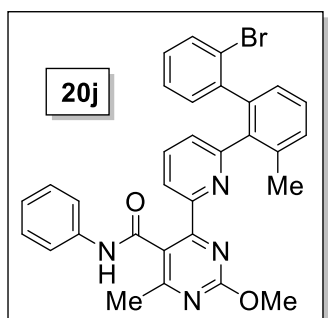

Beige solid. Yield: 54%.  $^1\text{H}$  NMR ( $\text{CDCl}_3$ ):  $\delta_{\text{H}}$  (ppm) 2.04 (s, 3H), 2.62 (s, 3H), 4.06 (s, 3H), 6.50 (bs, 1H), 6.87 (bs, 1H), 6.90 (app. t, 1H,  $J=7.2$  Hz), 6.96 (t, 1H,  $J=7.3$  Hz), 7.03-7.07 (m, 4H, 3 signals overlapping), 7.11 (d, 1H,  $J=7.9$  Hz), 7.14 (d, 2H,  $J=7.9$  Hz), 7.28 (app. t, 1H,  $J=7.7$  Hz), 7.43 (bs, 1H), 7.55 (app. t, 1H,  $J=7.8$  Hz), 7.76 (bs, 1H), 8.12 (bs, 1H).  $^{13}\text{C}$  NMR ( $\text{CDCl}_3$ ):  $\delta_{\text{C}}$  (ppm) 20.36, 22.37, 54.97, 119.68, 121.17, 123.10, 123.50, 124.03, 126.22, 126.51, 127.40, 127.58, 128.18, 128.80, 129.82, 131.95, 132.28, 136.72, 136.78, 137.62, 138.74, 140.00, 141.73, 152.82, 158.01, 161.19, 164.25, 166.21, 169.63. FT-IR: wavenumber ( $\text{cm}^{-1}$ ) 1684 (m), 1654 (m), 1663 (m), 1655 (m), 1599 (m), 1560 (s), 1555 (s), 1498 (m), 1470 (m), 1442 (m), 1380 (s), 1316 (s), 1262 (m), 1070 (m), 1011 (m), 824 (m), 797 (m), 787 (w), 754 (s). MS (ES-API),  $m/z$ : calcd for  $\text{C}_{31}\text{H}_{25}\text{BrN}_4\text{O}_2$ : 531.19; found: 532.1 [ $\text{M}+\text{H}^+$ ]. m.p. 139-141  $^{\circ}\text{C}$ .

• **4-(6-(4'-Bromo-3-methyl-[1,1'-biphenyl]-2-yl)pyridin-2-yl)-2-methoxy-6-methyl-N-phenylpyrimidine-5-carboxamide (20k):**

Beige solid. Yield: 62%.  $^1\text{H}$  NMR ( $\text{CDCl}_3$ ):  $\delta_{\text{H}}$  (ppm) 2.01 (s, 3H), 2.61 (s, 3H), 4.08 (s, 3H), 6.74 (d, 2H,  $J=8.2$  Hz), 6.83 (d, 1H,  $J=7.7$  Hz), 6.91 (t, 1H,  $J=7.3$  Hz), 6.99 (app. t, 2H,  $J=7.5$  Hz), 7.06 (m, 2H, 2 signals overlapping), 7.12 (d, 2H,  $J=7.7$  Hz), 7.17 (d, 2H,  $J=8.2$

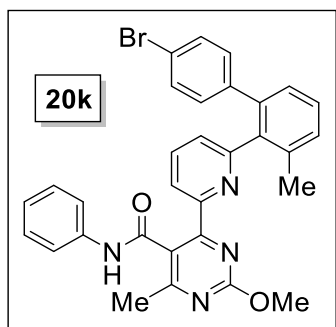

Hz), 7.25 (app. t, 1H, J=7.7 Hz), 7.59 (app. t, 1H, J=7.8 Hz), 7.72 (bs, 1H), 8.23 (d, 1H, J=7.9 Hz).  $^{13}\text{C}$  NMR ( $\text{CDCl}_3$ ):  $\delta_{\text{C}}$  (ppm) 20.37, 22.29, 54.99, 119.55, 120.59, 121.11, 123.08, 123.94, 127.00, 127.04, 128.07, 128.70, 129.54, 130.71, 131.22, 136.98, 137.08, 137.56, 138.52, 139.68, 140.28, 152.91, 158.45, 161.13, 164.33, 166.30, 169.49. FT-IR: wavenumber ( $\text{cm}^{-1}$ ) 1685 (m), 1655 (m), 1599 (m), 1555 (s), 1498 (m), 1470 (m), 1442 (m), 1380 (s), 1316 (s), 1261 (m), 1070 (m), 1011 (m), 824 (m), 797 (m), 754 (s). MS (ES-API), m/z: calcd for  $\text{C}_{31}\text{H}_{25}\text{BrN}_4\text{O}_2$ : 564.12; found: 565.0  $[\text{M}+\text{H}^+]$ . m.p. 115-117 °C.

• **4-(6-(4'-Iodo-3-methyl-[1,1'-biphenyl]-2-yl)pyridin-2-yl)-2-methoxy-6-methyl-N-phenylpyrimidine-5-carboxamide (20l):**

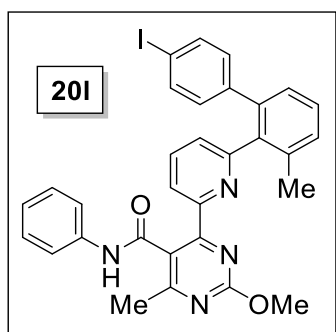

Beige solid. Yield: 60%.  $^1\text{H}$  NMR ( $\text{CDCl}_3$ ):  $\delta_{\text{H}}$  (ppm) 2.01 (s, 3H), 2.63 (s, 3H), 4.11 (s, 3H), 6.61 (d, 2H, J=8.3 Hz), 6.84 (d, 1H, J=8.3 Hz), 6.91 (t, 1H, J=7.3 Hz), 7.00 (app. t, 2H, J=7.6 Hz), 7.05 (d, 1H, J=7.7 Hz), 7.07 (d, 1H, J=7.5 Hz), 7.11 (d, 2H, J=7.9 Hz), 7.25 (app. t, 1H, J=7.6 Hz), 7.37 (d, 2H, J=8.3 Hz), 7.60 (app. t, 1H, J=7.8 Hz), 7.64 (bs, 1H), 8.23 (d, 1H, J=7.9 Hz).  $^{13}\text{C}$  NMR ( $\text{CDCl}_3$ ):  $\delta_{\text{C}}$  (ppm) 20.39, 22.32, 55.02, 92.25, 119.56, 121.17, 123.10, 123.98, 126.99, 127.03, 128.10, 128.71, 129.55, 131.49, 136.69, 137.03, 137.09, 137.51, 138.47, 139.74, 140.88, 152.95, 158.43, 161.21, 164.37, 166.32, 169.50. FT-IR: wavenumber ( $\text{cm}^{-1}$ ) 1663 (m), 1657 (m), 1599 (m), 1555 (s), 1498 (m), 1469 (m), 1442 (m), 1379 (s), 1317 (s), 1261 (m), 1070 (m), 1011 (m), 824 (m), 797 (m), 755 (s). MS (ES-API), m/z: calcd for  $\text{C}_{31}\text{H}_{25}\text{IN}_4\text{O}_2$ : 612.10; found: 613.1  $[\text{M}+\text{H}^+]$ . m.p. 116-118 °C.

◆ **General method for synthesis of diazonium tetrafluoroborate salts:** In a round-bottom flask open to air, an aniline (0.1 mol, 1 equiv.) was dissolved in a mixture of water (40 mL) and 50% wt. aqueous  $\text{HBF}_4$  solution (25.4 mL of solution, 17.56 g  $\text{HBF}_4$ , 0.2 mol, 2 equiv.). In case the aniline was not fully soluble, drops of MeOH were added until the solution became transparent. The resulting solution was cooled at 0 °C, followed by dropwise addition of a solution of  $\text{NaNO}_2$  (7.59 g, 0.11 mol, 1.1 equiv.) in 15 mL of water, while the temperature was maintained at 0-5 °C. Stirring continued at the same temperature for 2 more hours. The crude solid precipitate was collected by filtration and washed with a small amount of cold water. It was then dissolved in acetone and precipitated again by addition of diethyl ether. The solid was collected by filtration and dried under house vacuum. It was stored in small portions in a fridge until use.

• **Benzenediazonium tetrafluoroborate (16):**

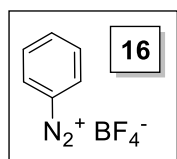

Grey solid. Yield: 85%.  $^1\text{H}$  NMR (DMSO- $d_6$ ):  $\delta_{\text{H}}$  (ppm) 7.98 (app. t, 2H,  $J=8.0$  Hz), 8.26 (tt, 1H,  $J_1=7.7$  Hz,  $J_2=1.1$  Hz), 8.66 (d, 2H,  $J_1=8.3$  Hz,  $J_2=1.1$  Hz).  $^{13}\text{C}$  NMR (DMSO- $d_6$ ):  $\delta_{\text{C}}$  (ppm) 131.26, 132.69, 140.86, 157.30. FT-IR: wavenumber ( $\text{cm}^{-1}$ ) 2295 (m), 1570 (m), 1462 (m), 1312 (m), 1026 (s), 756 (m), 665 (m), 515 (m). MS (ES-API),  $m/z$ : calcd for  $\text{C}_6\text{H}_5\text{N}_2^+$ : 105.04; found: 105.1 [M].

• **4-Isopropylbenzenediazonium tetrafluoroborate (19a):**

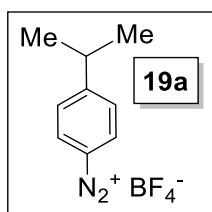

White solid. Yield: 71%.  $^1\text{H}$  NMR (DMSO- $d_6$ ):  $\delta_{\text{H}}$  (ppm) 1.25 (d, 6H,  $J=6.9$  Hz), 3.16 (hept., 1H,  $J=6.9$  Hz), 7.89 (d, 2H,  $J=8.8$  Hz), 8.58 (d, 2H,  $J=8.8$  Hz).  $^{13}\text{C}$  NMR (DMSO- $d_6$ ):  $\delta_{\text{C}}$  (ppm) 22.82, 34.48, 112.31, 129.45, 133.06, 163.49. FT-IR: wavenumber ( $\text{cm}^{-1}$ ) 2270 (m), 1580 (m), 1462 (w), 1288 (w), 1037 (s), 843 (m), 542 (m). MS (ES-API),  $m/z$ : calcd for  $\text{C}_9\text{H}_{11}\text{N}_2^+$ : 147.09; found: 147.0 [M].

• **4-(*Tert*-butyl)benzenediazonium tetrafluoroborate (19b):**

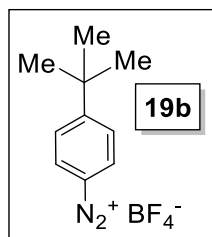

White solid. Yield: 63%.  $^1\text{H}$  NMR (DMSO- $d_6$ ):  $\delta_{\text{H}}$  (ppm) 1.34 (s, 9H), 8.03 (d, 2H,  $J=9.1$  Hz), 8.59 (d, 2H,  $J=9.1$  Hz).  $^{13}\text{C}$  NMR (DMSO- $d_6$ ):  $\delta_{\text{C}}$  (ppm) 30.20, 36.51, 112.32, 128.56, 132.85, 165.55. FT-IR: wavenumber ( $\text{cm}^{-1}$ ) 2270 (m), 1580 (m), 1038 (s), 843 (m), 542 (m). MS (ES-API),  $m/z$ : calcd for  $\text{C}_{10}\text{H}_{13}\text{N}_2^+$ : 161.11; found: 161.1 [M].

• **Naphthalene-1-diazonium tetrafluoroborate (19c):**

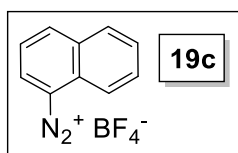

Brown solid. Yield: 86%.  $^1\text{H}$  NMR (DMSO- $d_6$ ):  $\delta_{\text{H}}$  (ppm) 7.98 (m, 1H), 8.06 (m, 1H), 8.12 (m, 1H), 8.43 (dd, 1H,  $J_1=8.0$  Hz,  $J_2=3.7$  Hz), 8.51 (dd, 1H,  $J_1=8.0$  Hz,  $J_2=3.7$  Hz), 8.94 (dd, 1H,  $J_1=8.0$  Hz,  $J_2=3.7$  Hz), 9.20 (dd, 1H,  $J_1=8.0$  Hz,  $J_2=3.7$  Hz).  $^{13}\text{C}$  NMR (DMSO- $d_6$ ):  $\delta_{\text{C}}$  (ppm) 111.10, 122.46, 126.42, 127.14, 129.93, 130.34, 132.24, 132.60, 137.21, 142.66. FT-IR: wavenumber ( $\text{cm}^{-1}$ ) 2264 (m), 1369 (m), 1198 (m), 1033 (s), 808 (m), 768 (m). MS (ES-API),  $m/z$ : calcd for  $\text{C}_{10}\text{H}_7\text{N}_2^+$ : 155.06; found: 155.0 [M].

• **4-(Dimethylamino)benzenediazonium tetrafluoroborate (19d):**

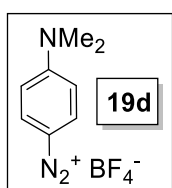

Yellow solid. Yield: 91%.  $^1\text{H}$  NMR (DMSO- $d_6$ ):  $\delta_{\text{H}}$  (ppm) 3.26 (s, 6H), 7.06 (d, 2H,  $J=9.7$  Hz), 8.22 (d, 2H,  $J=9.7$  Hz).  $^{13}\text{C}$  NMR (DMSO- $d_6$ ):  $\delta_{\text{C}}$  (ppm) 40.52, 88.98, 113.90, 134.03, 156.17. FT-IR: wavenumber ( $\text{cm}^{-1}$ ) 2156



(s), 1582 (s), 1389 (m), 1113 (m), 1029 (s), 932 (m), 826 (m). MS (ES-API), m/z: calcd for  $C_8H_{10}N_3^+$ : 148.09; found: 148.0 [M].

• **4-(Diethylamino)benzenediazonium tetrafluoroborate (19e):**

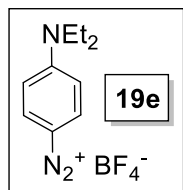

Yellow solid. Yield: 89%.  $^1H$  NMR (DMSO- $d_6$ ):  $\delta_H$  (ppm) 1.17 (t, 6H,  $J=7.1$  Hz), 3.62 (q, 4H,  $J=7.1$  Hz), 7.09 (d, 2H,  $J=9.7$  Hz), 8.21 (d, 2H,  $J=9.7$  Hz).  $^{13}C$  NMR (DMSO- $d_6$ ):  $\delta_C$  (ppm) 12.16, 45.37, 88.63, 113.84, 134.40, 154.60. FT-IR: wavenumber ( $cm^{-1}$ ) 2154 (s), 1580 (s), 1389 (m), 1113 (m), 1028 (s), 932 (m), 824 (m), 781 (w). MS (ES-API), m/z: calcd for  $C_{10}H_{14}N_3^+$ : 176.12; found: 176.1 [M].

• **3-Nitrobenzenediazonium tetrafluoroborate (19f):**

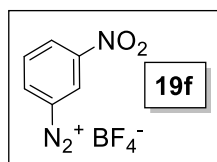

Yellow solid. Yield: 81%.  $^1H$  NMR (DMSO- $d_6$ ):  $\delta_H$  (ppm) 8.24 (app. t, 1H,  $J=8.4$  Hz), 8.99 (dd, 1H,  $J_1=8.5$  Hz,  $J_2=2.3$  Hz), 9.02 (dd, 1H,  $J_1=8.3$  Hz,  $J_2=1.7$  Hz), 9.61 (app. t, 1H,  $J=2.0$  Hz).  $^{13}C$  NMR (DMSO- $d_6$ ):  $\delta_C$  (ppm) 118.25, 128.17, 132.76, 135.02, 137.89, 147.65. FT-IR: wavenumber ( $cm^{-1}$ ) 2305 (w), 1605 (m), 1539 (m), 1352 (m), 1072 (m), 1034 (s), 999 (m), 905 (m), 818 (m), 775 (m), 733 (m). MS (ES-API), m/z: calcd for  $C_6H_4N_3O_2^+$ : 150.03; found: 150 [M].

• **4-Nitrobenzenediazonium tetrafluoroborate (19g):**

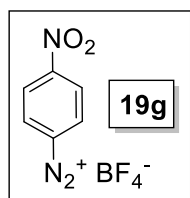

Yellow solid. Yield: 78%.  $^1H$  NMR (DMSO- $d_6$ ):  $\delta_H$  (ppm) 8.72 (d, 2H,  $J=9.4$  Hz), 8.93 (d, 2H,  $J=9.4$  Hz).  $^{13}C$  NMR (DMSO- $d_6$ ):  $\delta_C$  (ppm) 121.90, 126.03, 134.51, 153.22. FT-IR: wavenumber ( $cm^{-1}$ ) 2305 (w), 1605 (m), 1539 (m), 1352 (m), 1033 (s), 999 (m), 905 (m), 818 (m), 775 (m), 733 (m), 646 (m). MS (ES-API), m/z: calcd for  $C_6H_4N_3O_2^+$ : 150.03; found: 150.0 [M].

• **4-Fluorobenzenediazonium tetrafluoroborate (19h):**

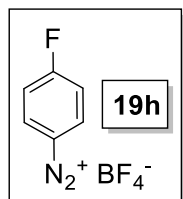

White solid. Yield: 88%.  $^1H$  NMR (DMSO- $d_6$ ):  $\delta_H$  (ppm) 7.89 (dd, 2H,  $J_1=9.2$  Hz,  $J_2=8.4$  Hz), 8.80 (dd, 2H,  $J_1=9.2$  Hz,  $J_2=4.5$  Hz).  $^{13}C$  NMR (DMSO- $d_6$ ):  $\delta_C$  (ppm) 111.87 (d,  $J=2.6$  Hz), 119.40 (d,  $J=25.7$  Hz), 136.99 (d,  $J=12.6$  Hz), 168.39 (d,  $J=267.0$  Hz). FT-IR: wavenumber ( $cm^{-1}$ ) 2293 (m), 1578 (m), 1483 (m), 1250 (m), 1013 (s), 851 (m), 832 (m), 696 (m). MS (ES-API), m/z: calcd for  $C_6H_4FN_2^+$ : 123.04; found: 123.1 [M].

• **4-Chlorobenzenediazonium tetrafluoroborate (19i):**

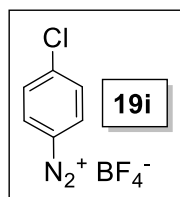

White solid. Yield: 92%.  $^1\text{H}$  NMR (DMSO- $d_6$ ):  $\delta_{\text{H}}$  (ppm) 8.11 (d, 2H,  $J=9.1$  Hz), 8.69 (d, 2H,  $J=9.1$  Hz).  $^{13}\text{C}$  NMR (DMSO- $d_6$ ):  $\delta_{\text{C}}$  (ppm) 114.78, 131.61, 134.41, 146.50. FT-IR: wavenumber ( $\text{cm}^{-1}$ ) 2290 (m), 1562 (m), 1412 (w), 1312 (w), 1078 (m), 1026 (s), 835 (s), 775 (m). MS (ES-API),  $m/z$ : calcd for  $\text{C}_6\text{H}_4\text{ClN}_2^+$ : 139.01; found: 139.0 [M].

• **2-Bromobenzenediazonium tetrafluoroborate (19j):**

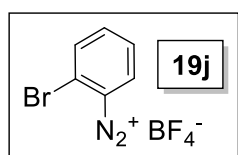

White solid. Yield: 88%.  $^1\text{H}$  NMR (DMSO- $d_6$ ):  $\delta_{\text{H}}$  (ppm) 7.99 (app. dt, 1H,  $J_1=7.9$  Hz,  $J_2=0.7$  Hz), 8.17 (app. dt, 1H,  $J_1=7.9$  Hz,  $J_2=1.5$  Hz), 8.31 (d, 1H,  $J_1=8.3$  Hz), 8.84 (dd, 1H,  $J_1=8.3$  Hz,  $J_2=1.5$  Hz).  $^{13}\text{C}$  NMR (DMSO- $d_6$ ):  $\delta_{\text{C}}$  (ppm) 118.72, 124.43, 130.41, 135.06, 135.29, 141.86. FT-IR: wavenumber ( $\text{cm}^{-1}$ ) 2361 (s), 2340 (s), 1562 (m), 1468 (m), 1302 (m), 1269 (m), 1051 (s), 1031 (s), 772 (s), 664 (w). MS (ES-API),  $m/z$ : calcd for  $\text{C}_6\text{H}_4\text{BrN}_2^+$ : 182.96; found: 182.9 [M].

• **4-Bromobenzenediazonium tetrafluoroborate (19k):**

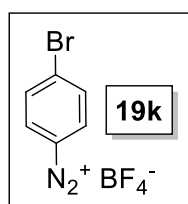

White solid. Yield: 90%.  $^1\text{H}$  NMR (DMSO- $d_6$ ):  $\delta_{\text{H}}$  (ppm) 8.26 (d, 2H,  $J=8.9$  Hz), 8.57 (d, 2H,  $J=8.9$  Hz).  $^{13}\text{C}$  NMR (DMSO- $d_6$ ):  $\delta_{\text{C}}$  (ppm) 115.15, 133.97, 134.53, 136.54. FT-IR: wavenumber ( $\text{cm}^{-1}$ ) 2290 (m), 1562 (m), 1468 (m), 1302 (m), 1269 (m), 1051 (s), 1031 (s), 772 (s), 656 (m), 525 (m). MS (ES-API),  $m/z$ : calcd for  $\text{C}_6\text{H}_4\text{BrN}_2^+$ : 182.96; found: 182.9 [M].

• **4-Iodobenzenediazonium tetrafluoroborate (19l):**

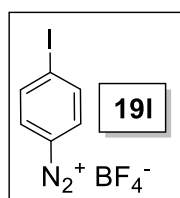

White solid. Yield: 72%.  $^1\text{H}$  NMR (DMSO- $d_6$ ):  $\delta_{\text{H}}$  (ppm) 8.34 (d, 2H,  $J=8.9$  Hz), 8.43 (d, 2H,  $J=8.9$  Hz).  $^{13}\text{C}$  NMR (DMSO- $d_6$ ):  $\delta_{\text{C}}$  (ppm) 113.69, 115.19, 132.89, 140.26. FT-IR: wavenumber ( $\text{cm}^{-1}$ ) 2284 (m), 1547 (m), 1462 (m), 1406 (m), 1288 (m), 1031 (s), 1004 (m), 826 (s), 758 (m). MS (ES-API),  $m/z$ : calcd for  $\text{C}_6\text{H}_4\text{IN}_2^+$ : 230.94; found: 230.9 [M].

## II. <sup>1</sup>H and <sup>13</sup>C NMR Spectra of Synthesized Compounds

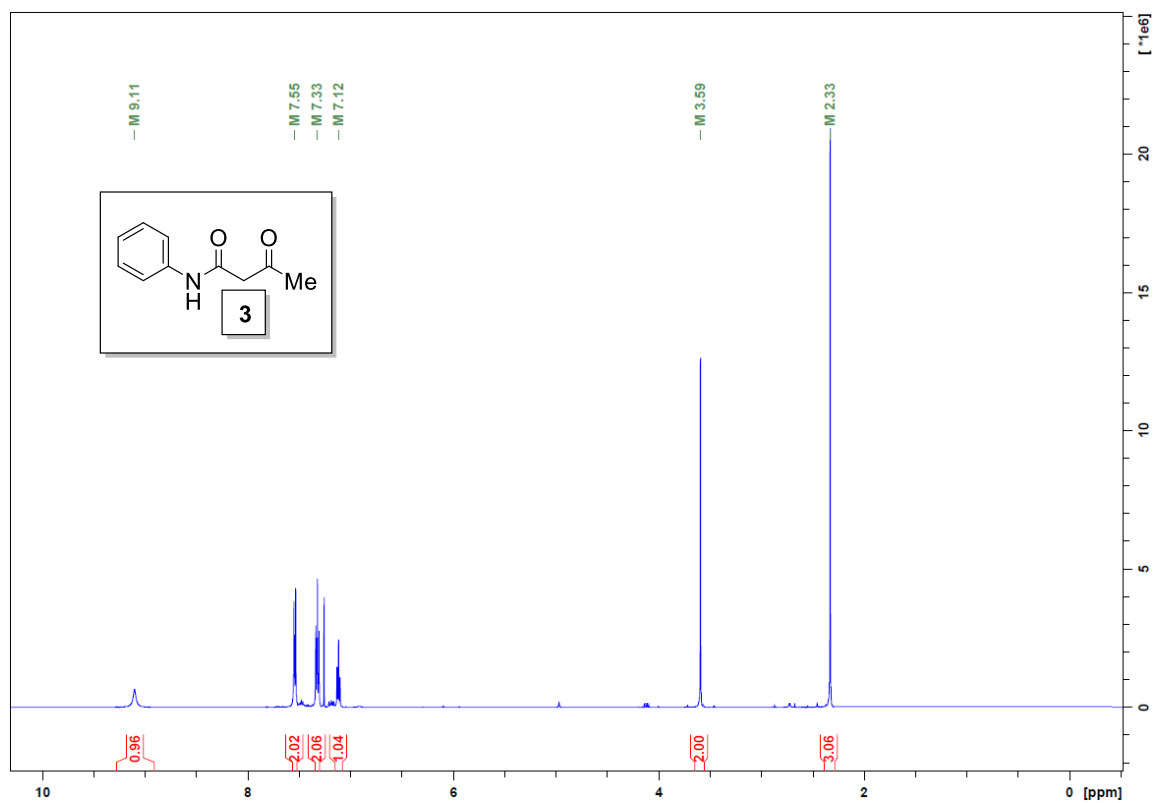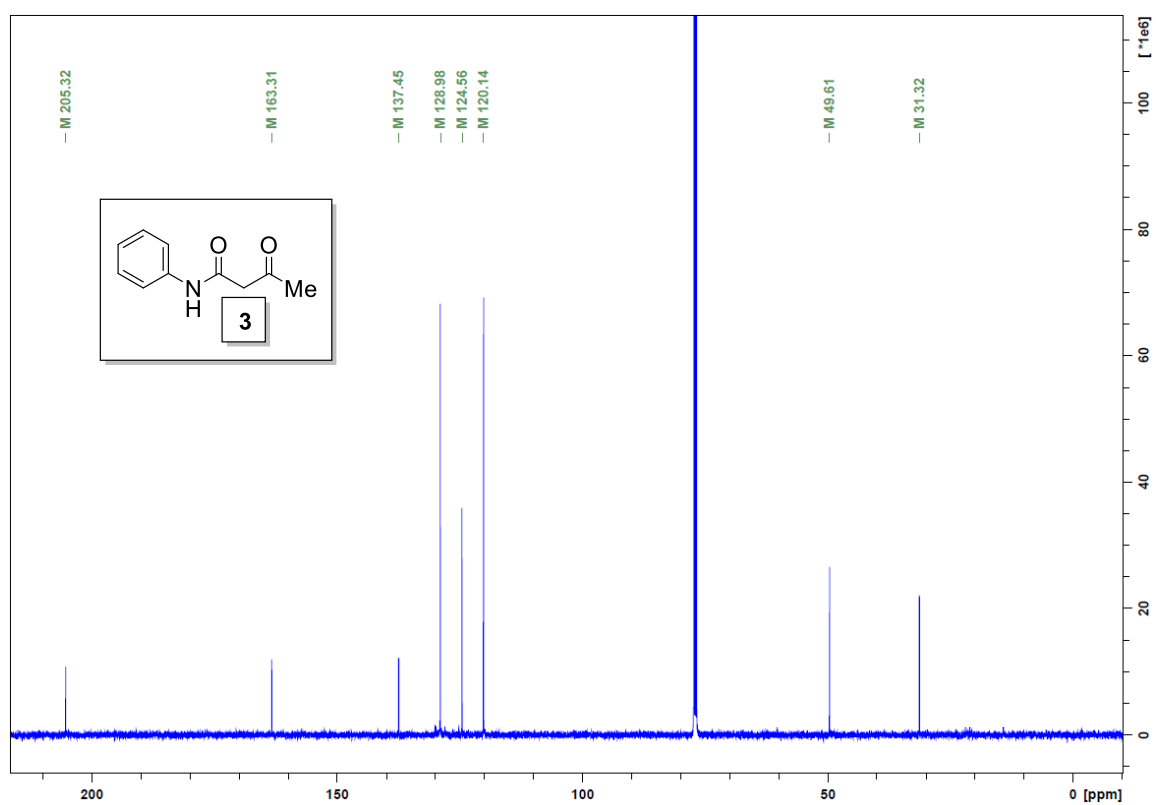

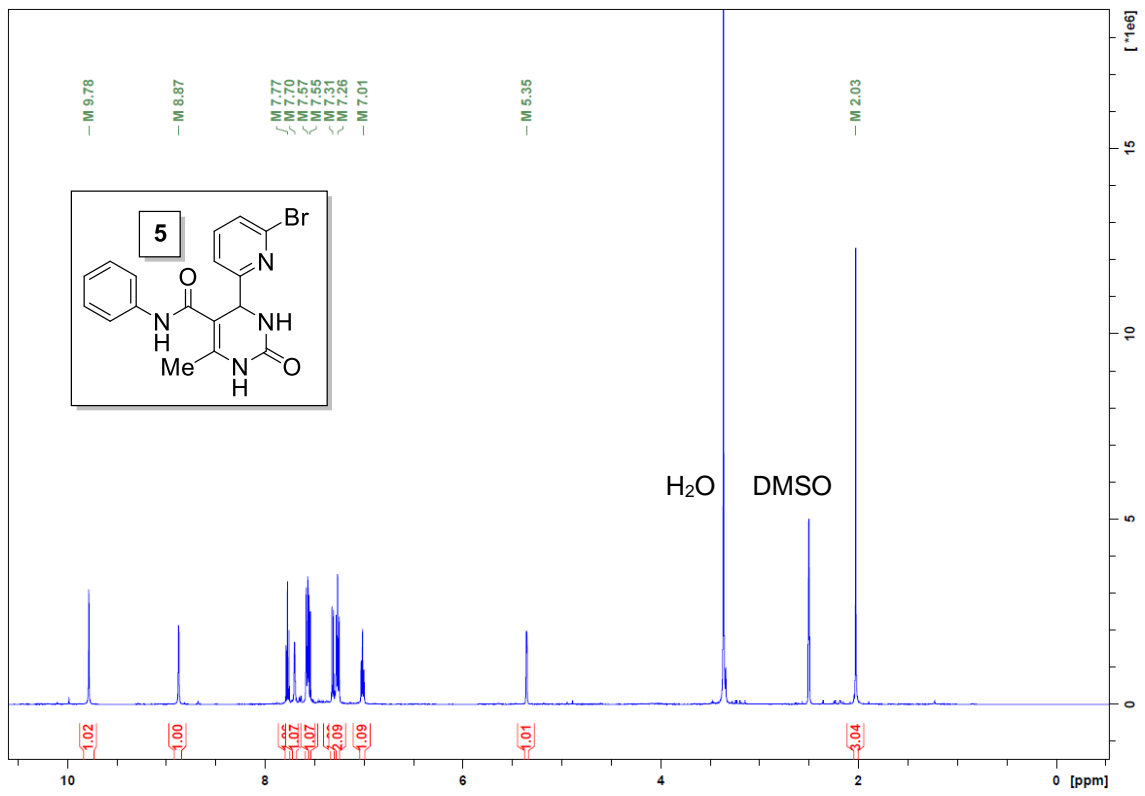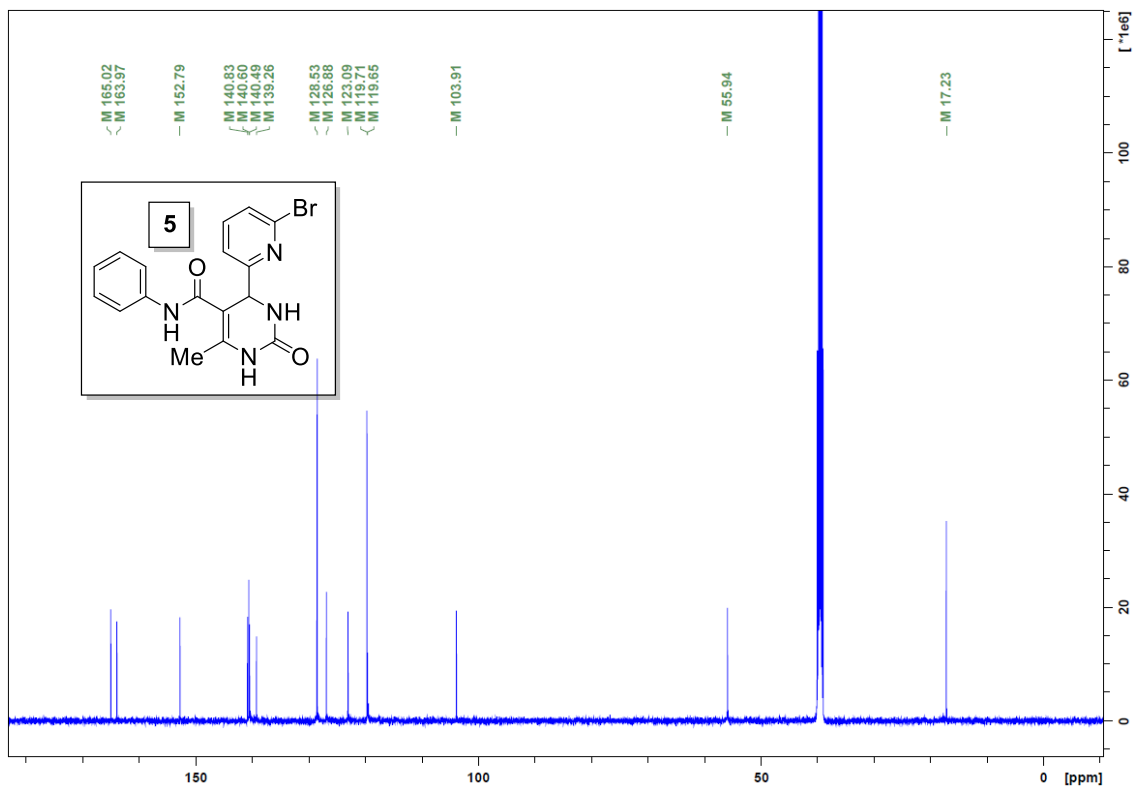

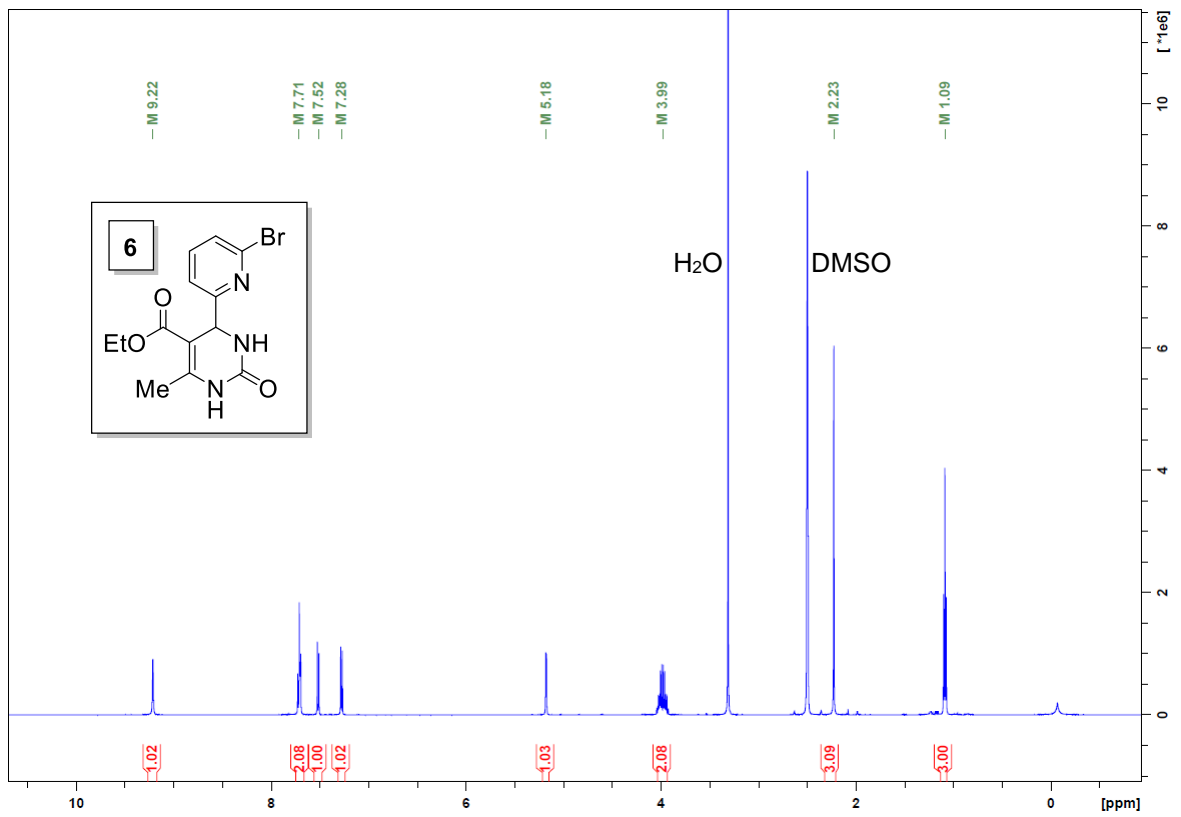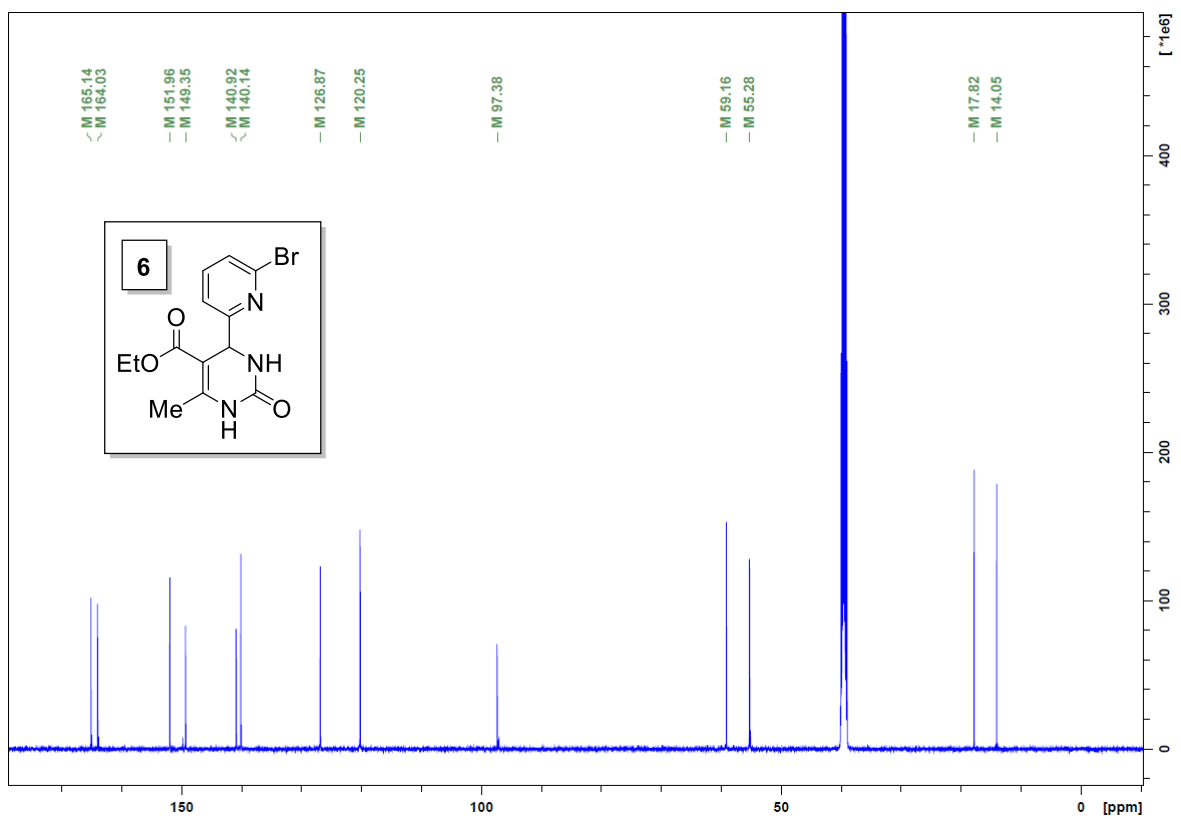

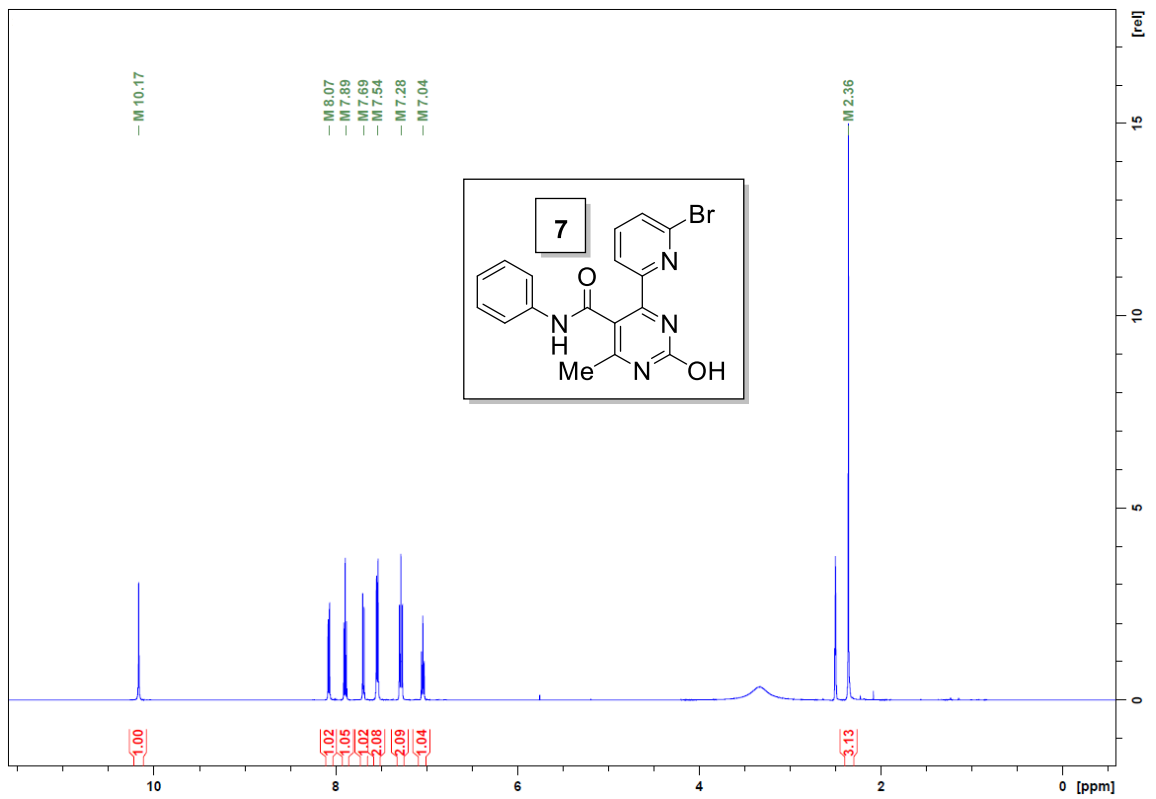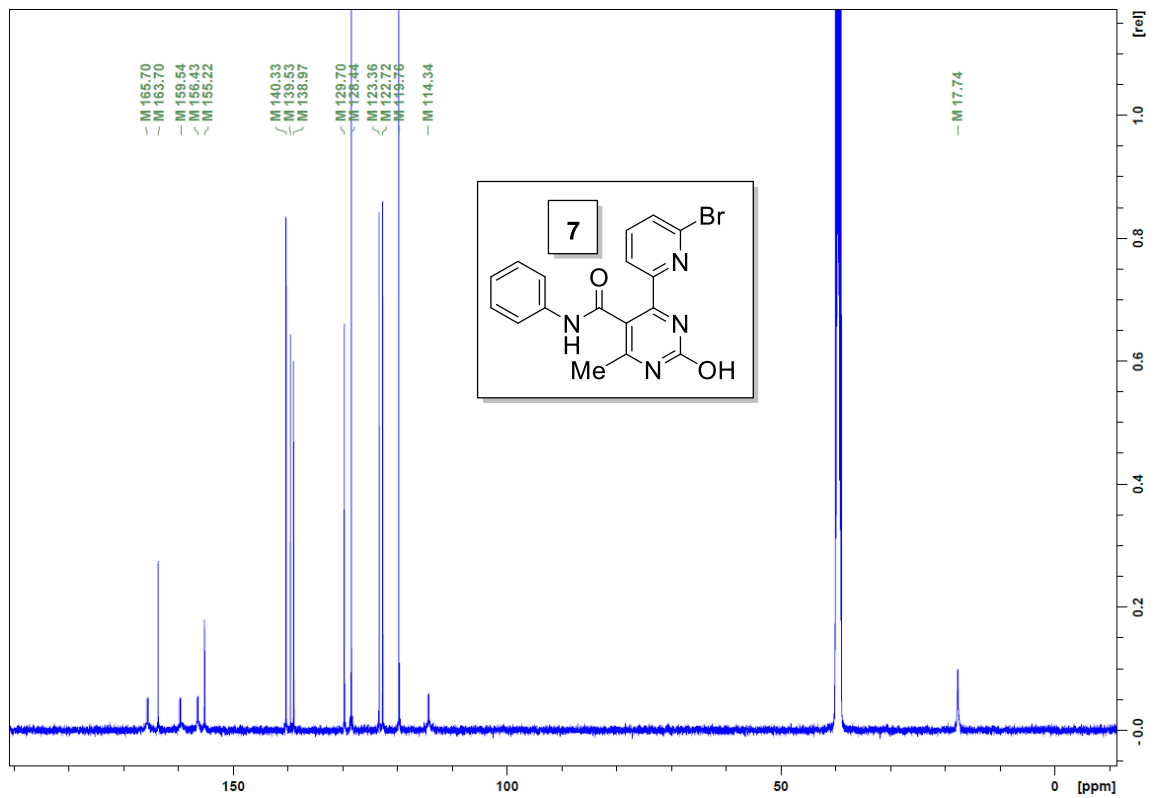

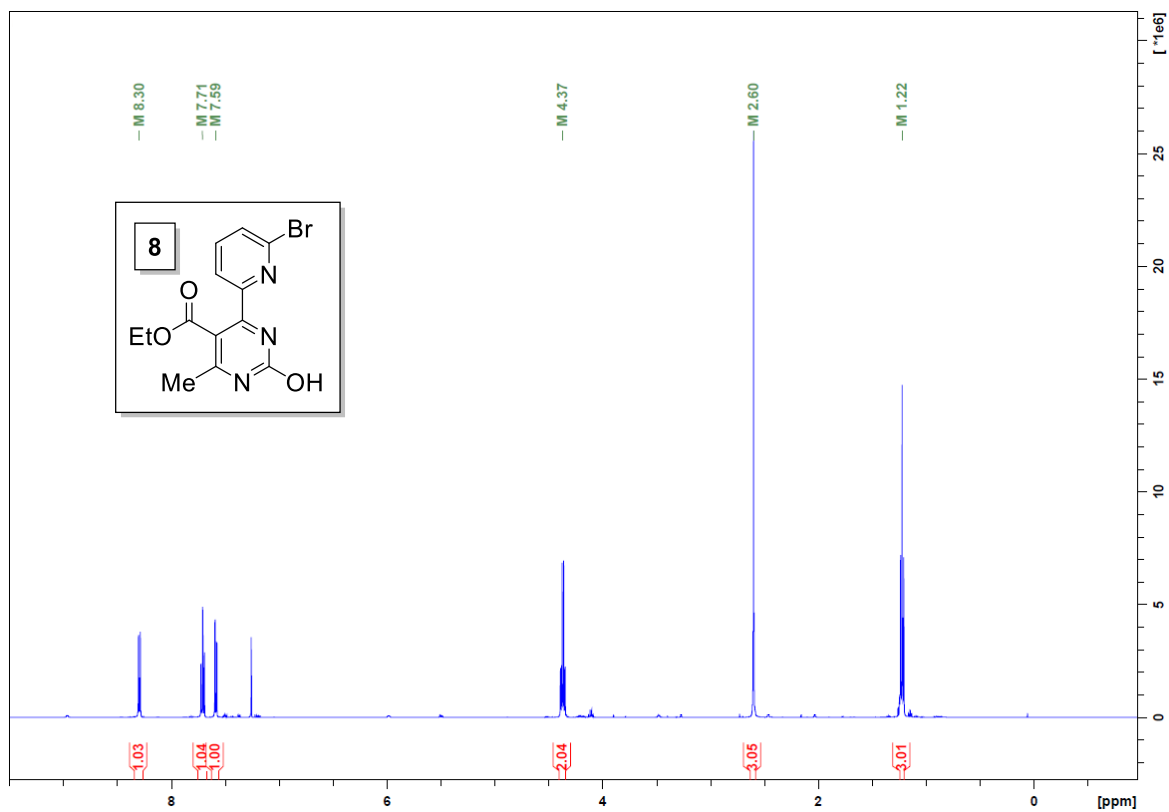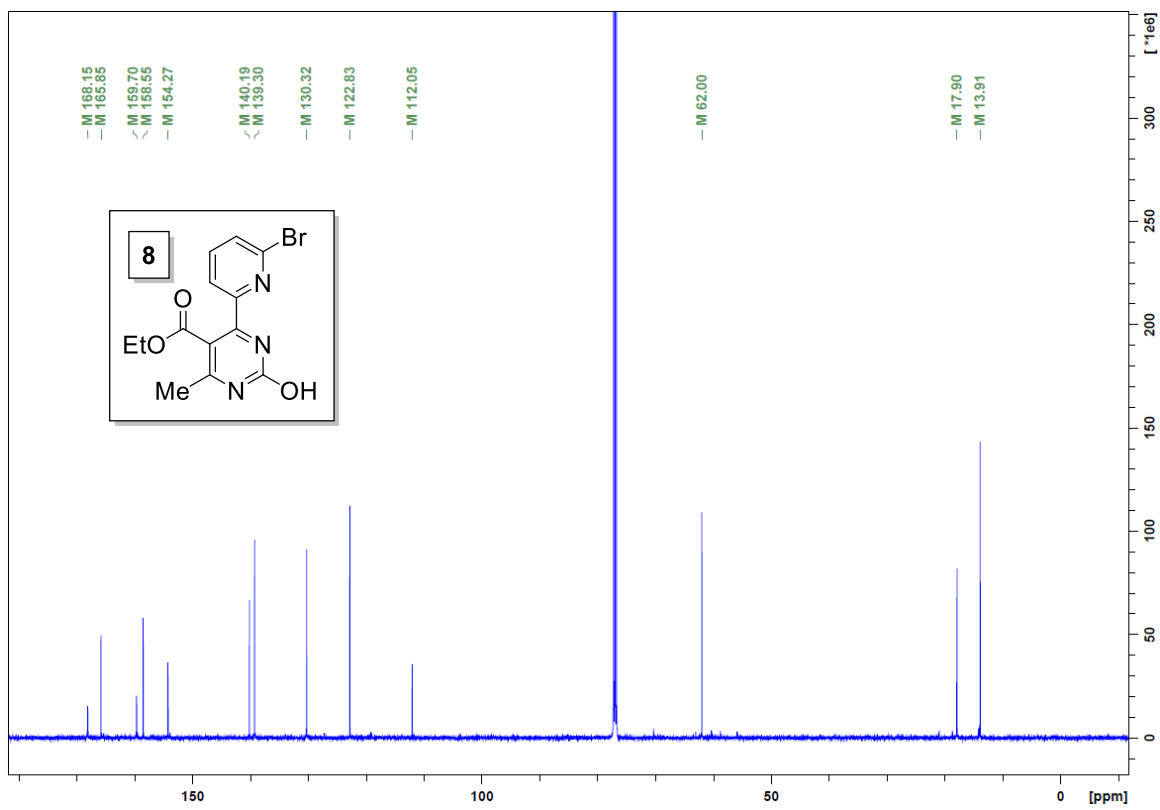

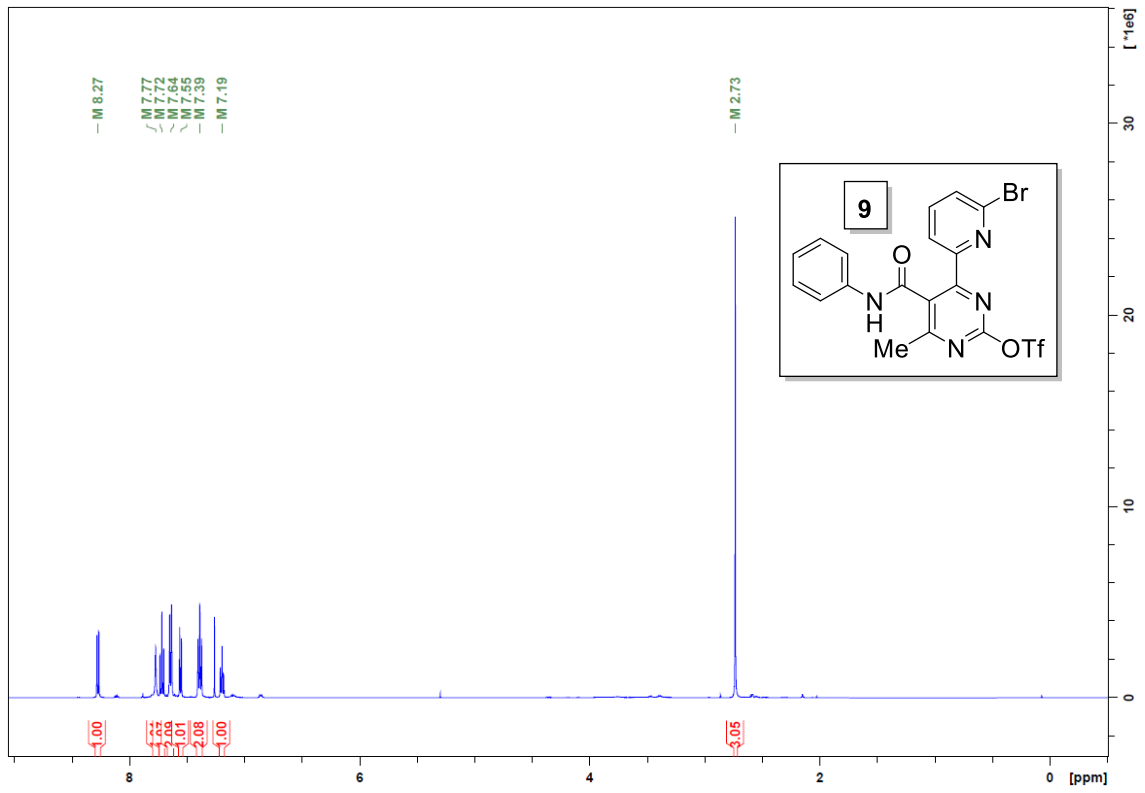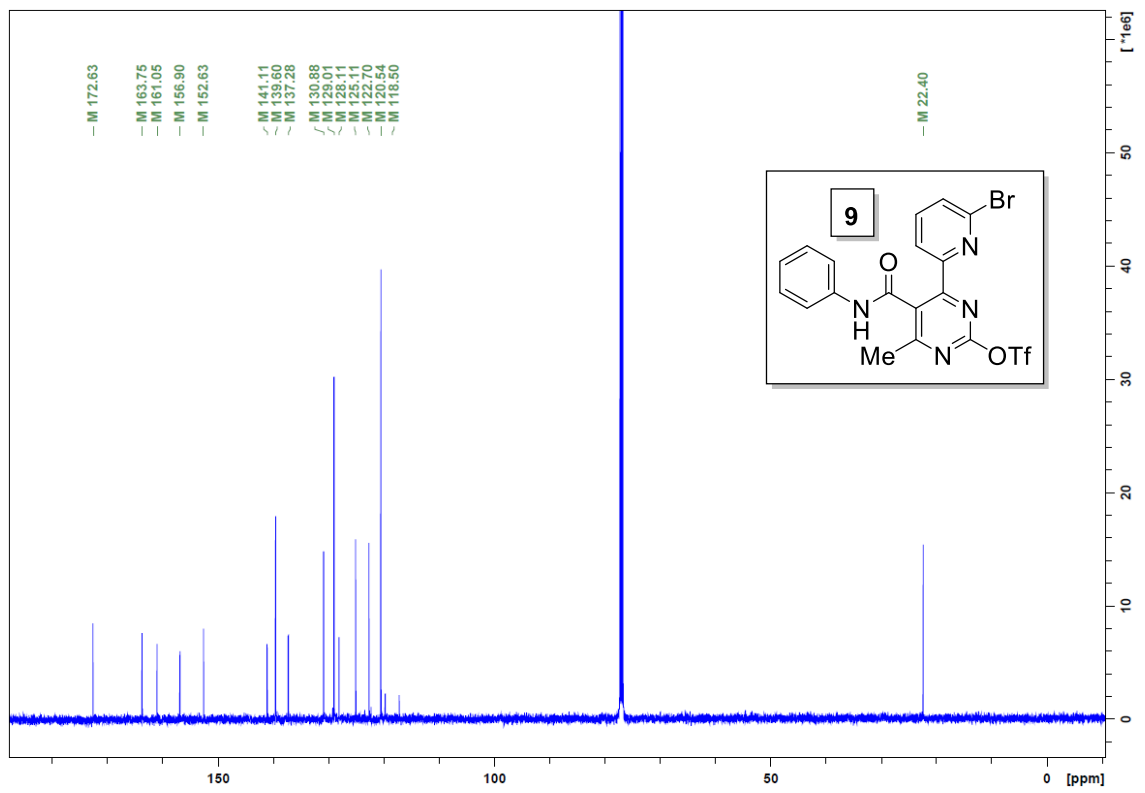



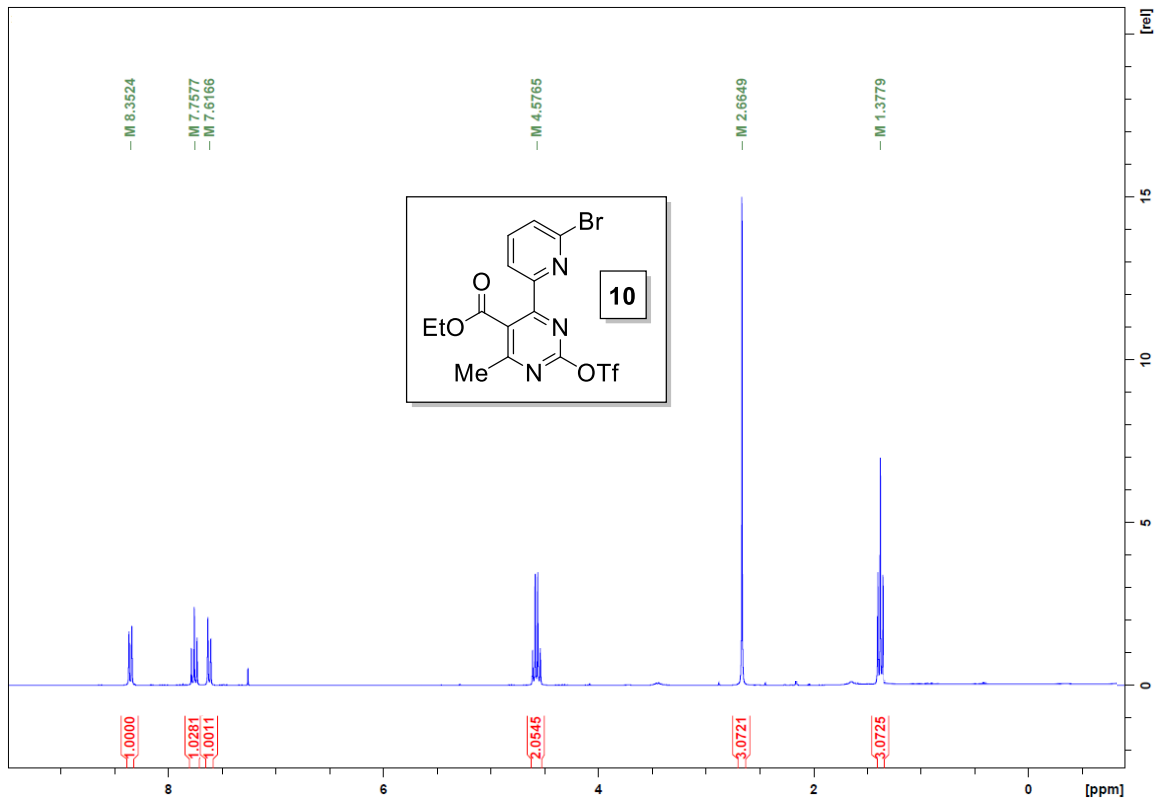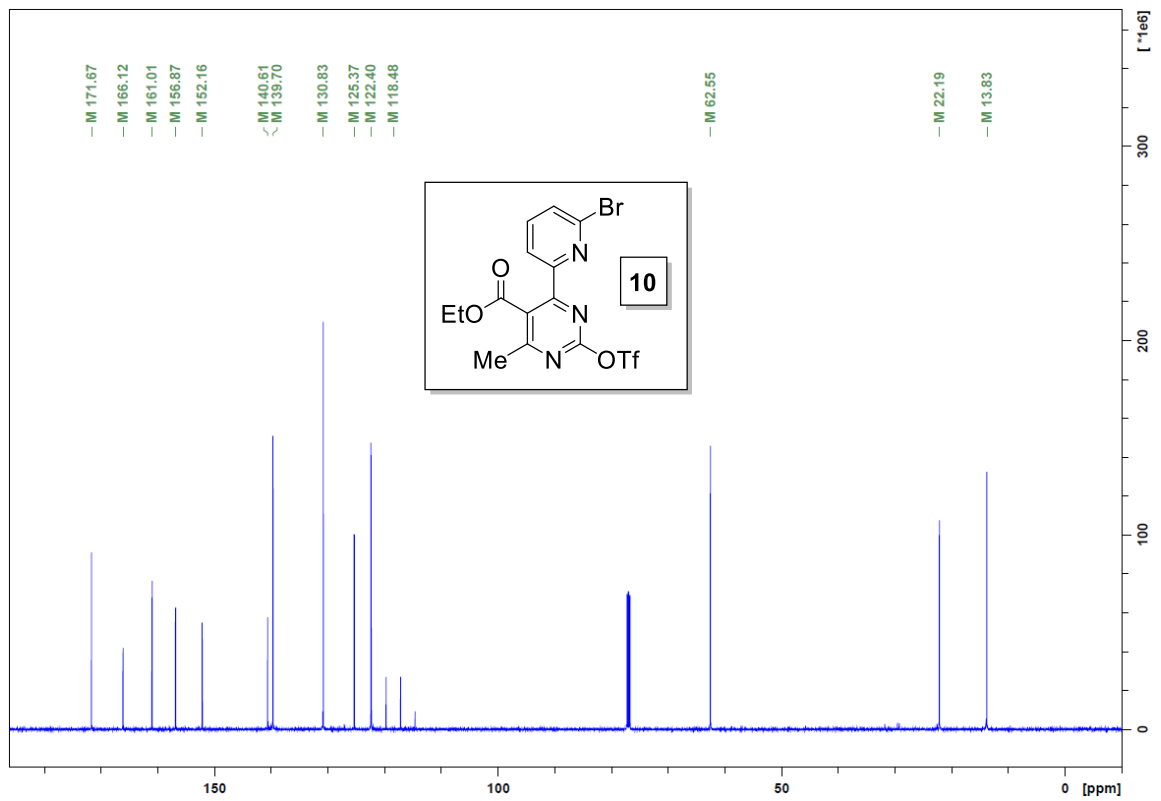

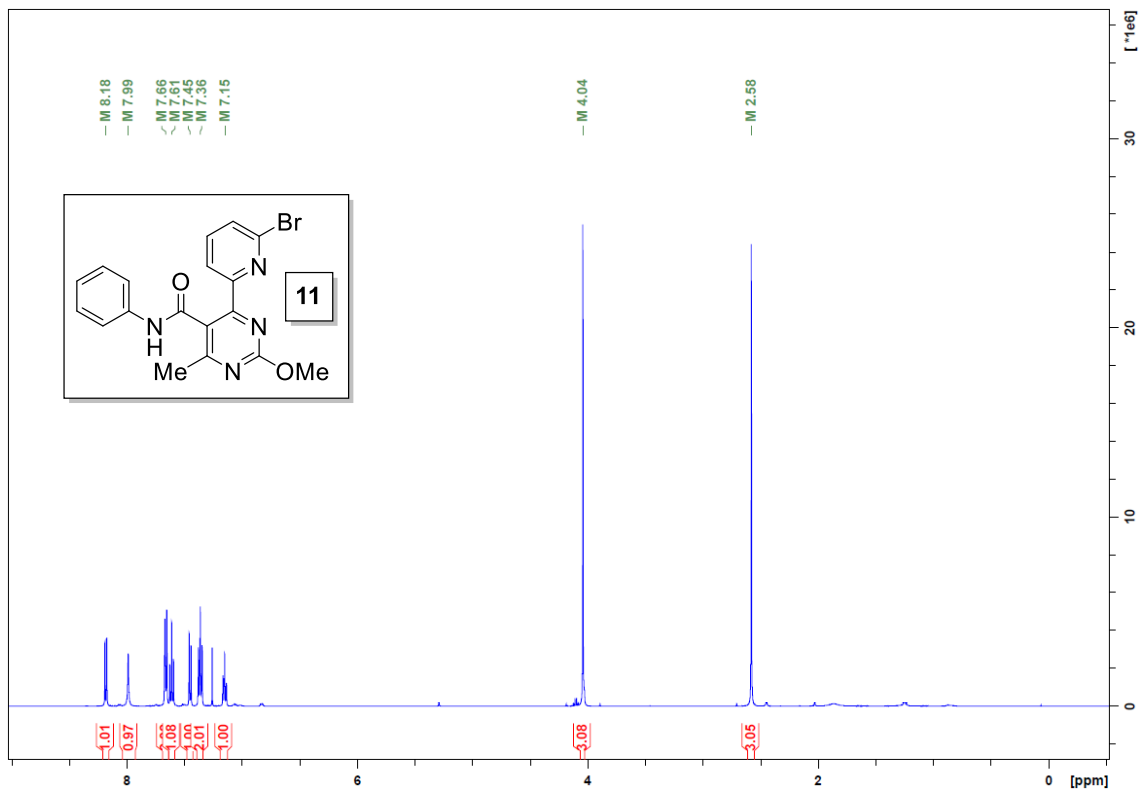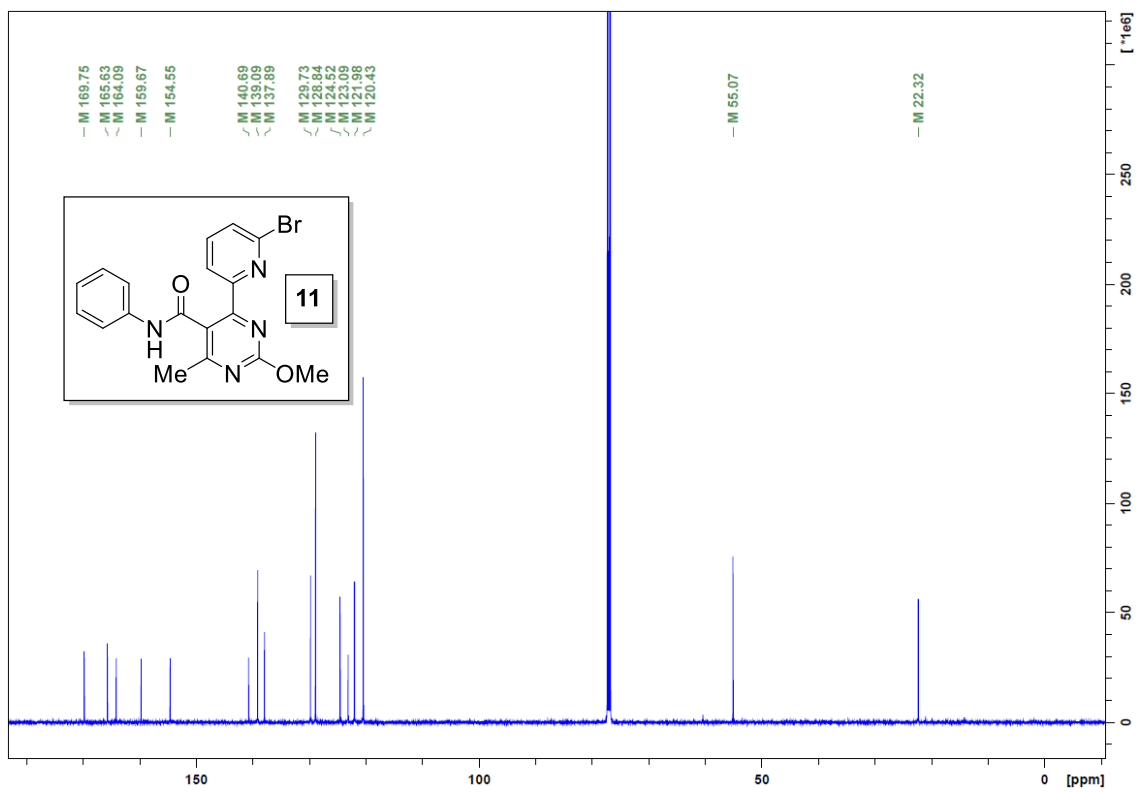

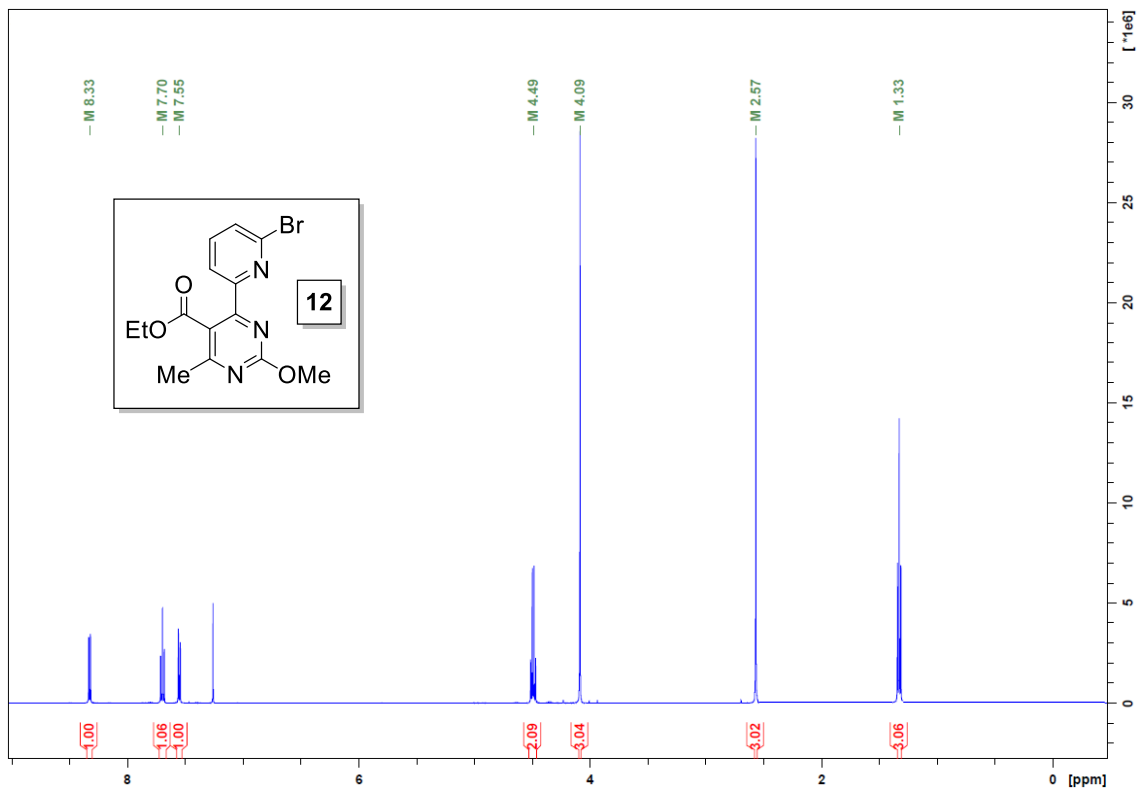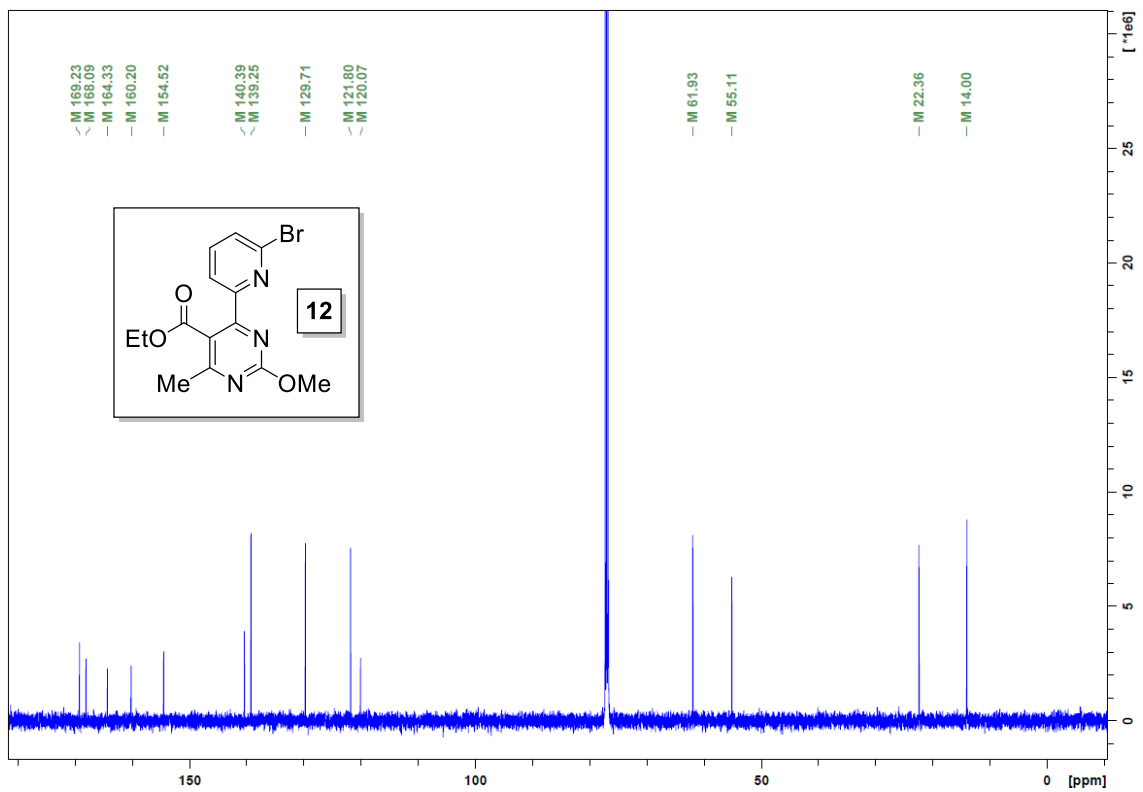

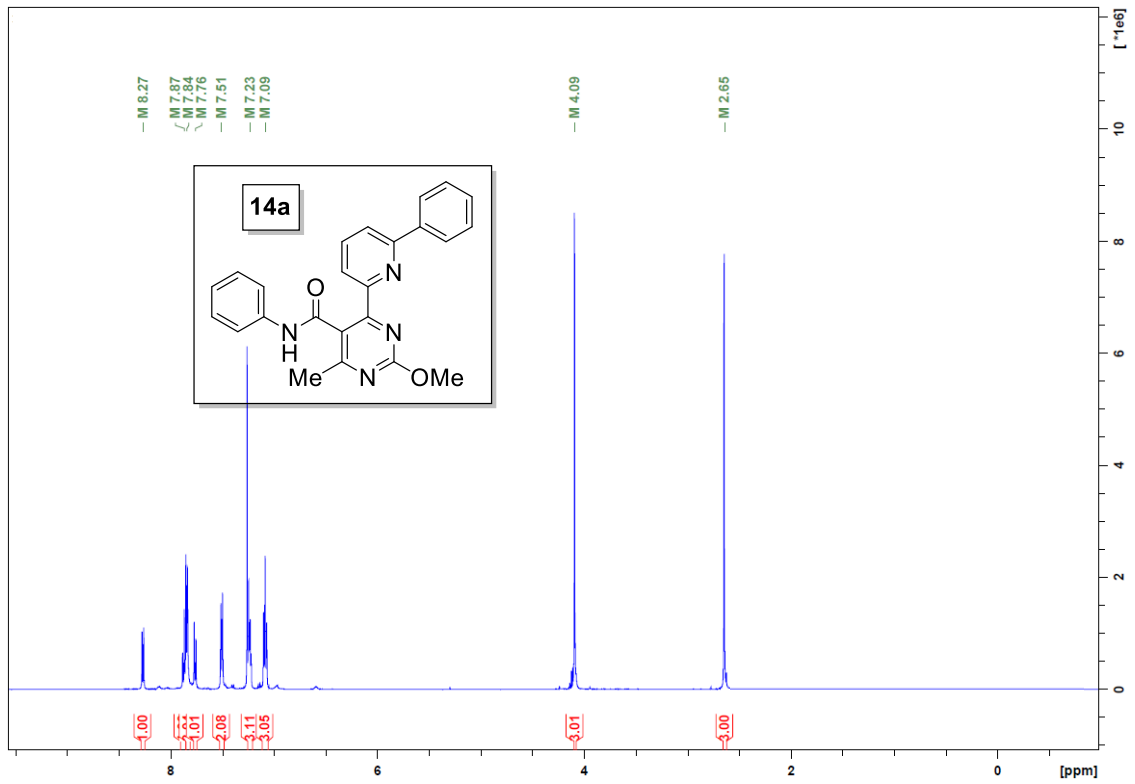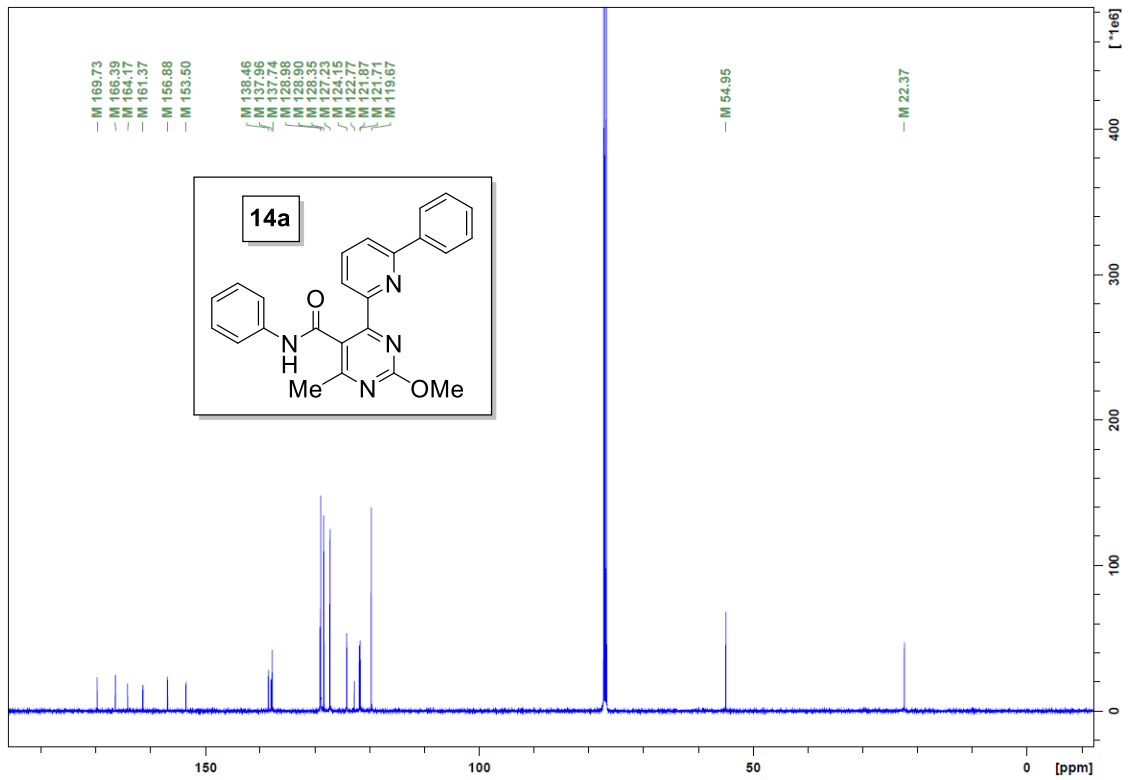

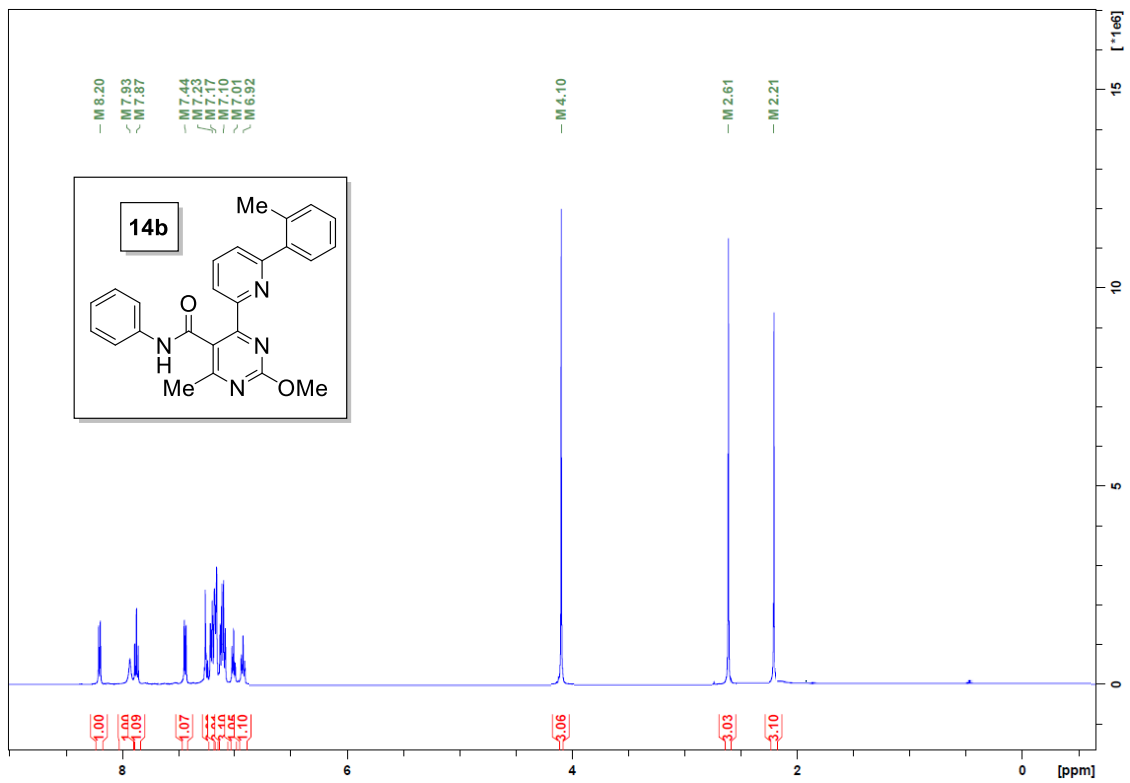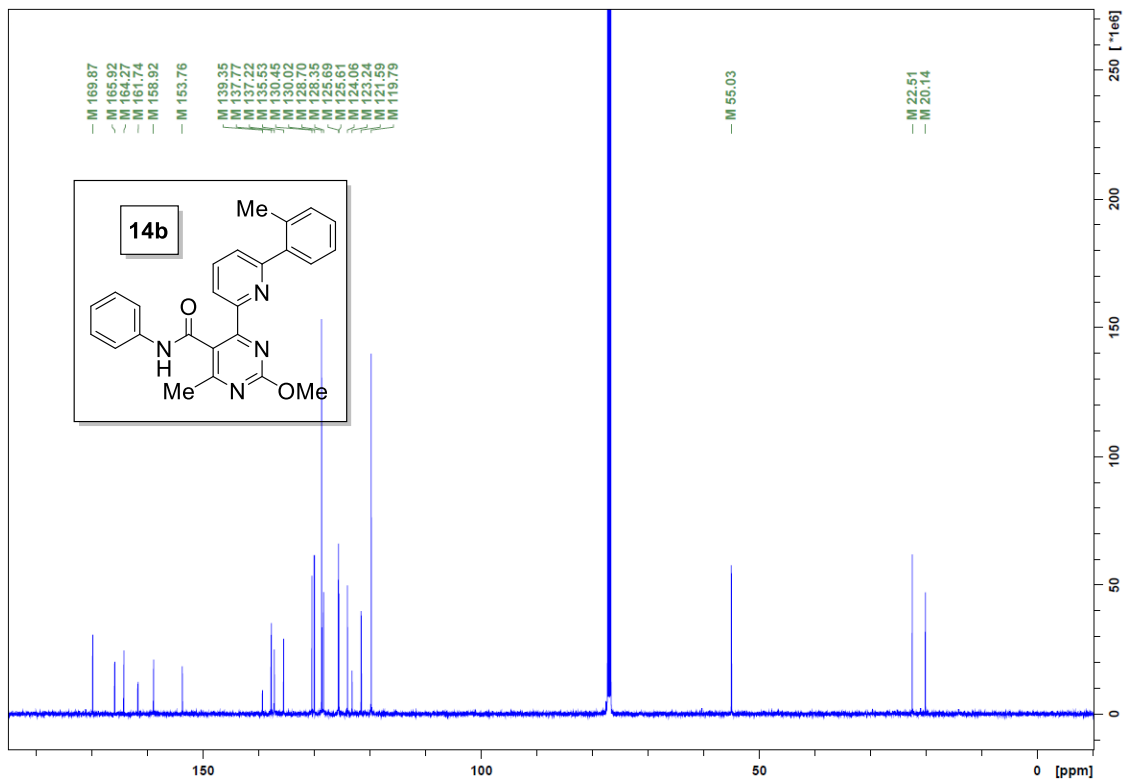

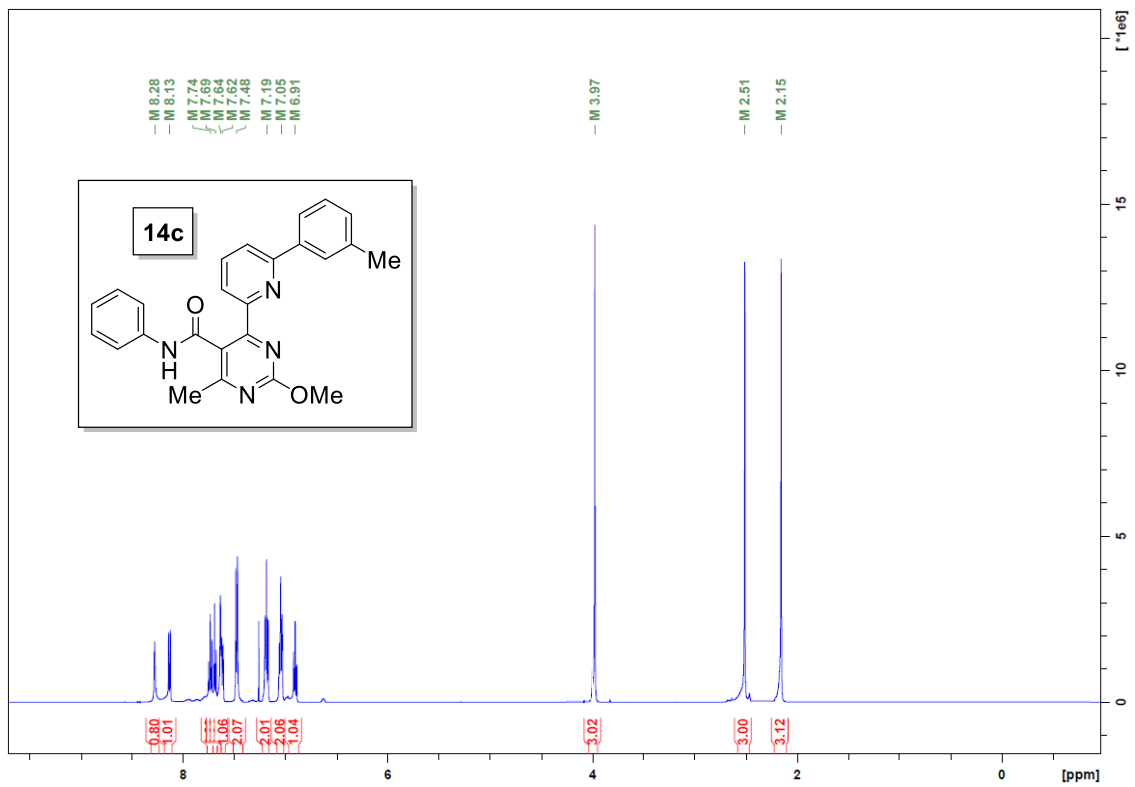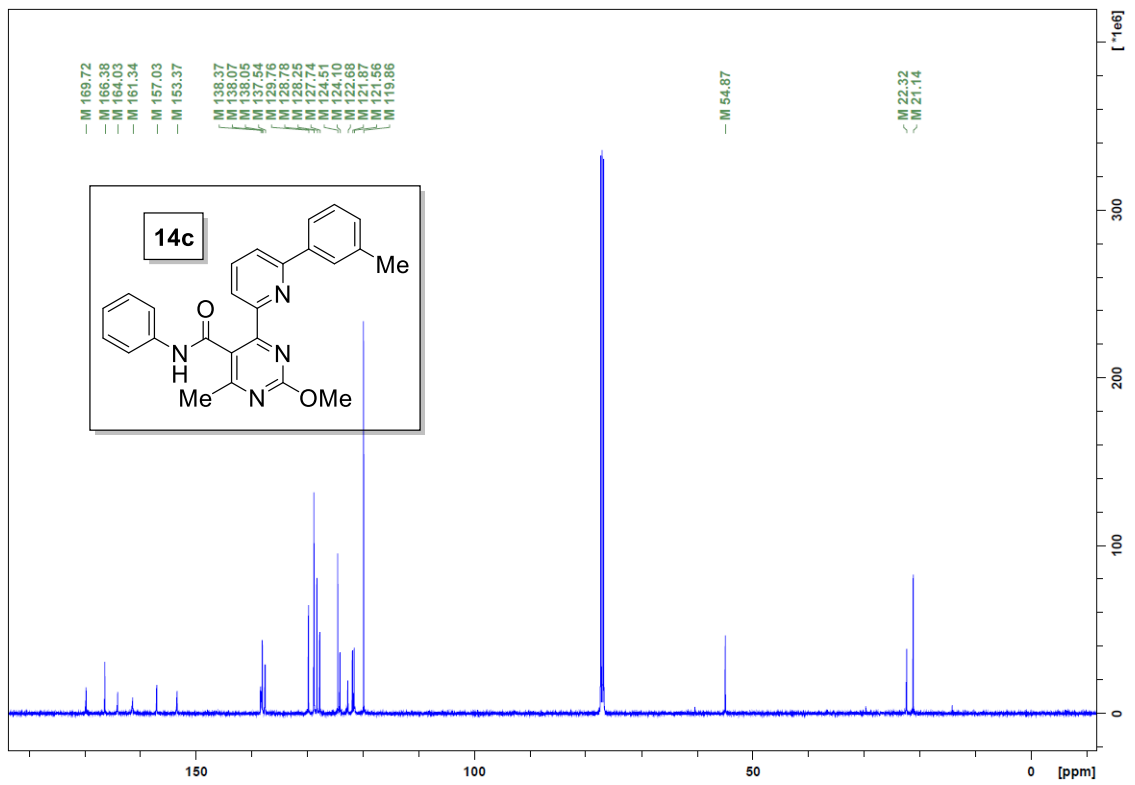

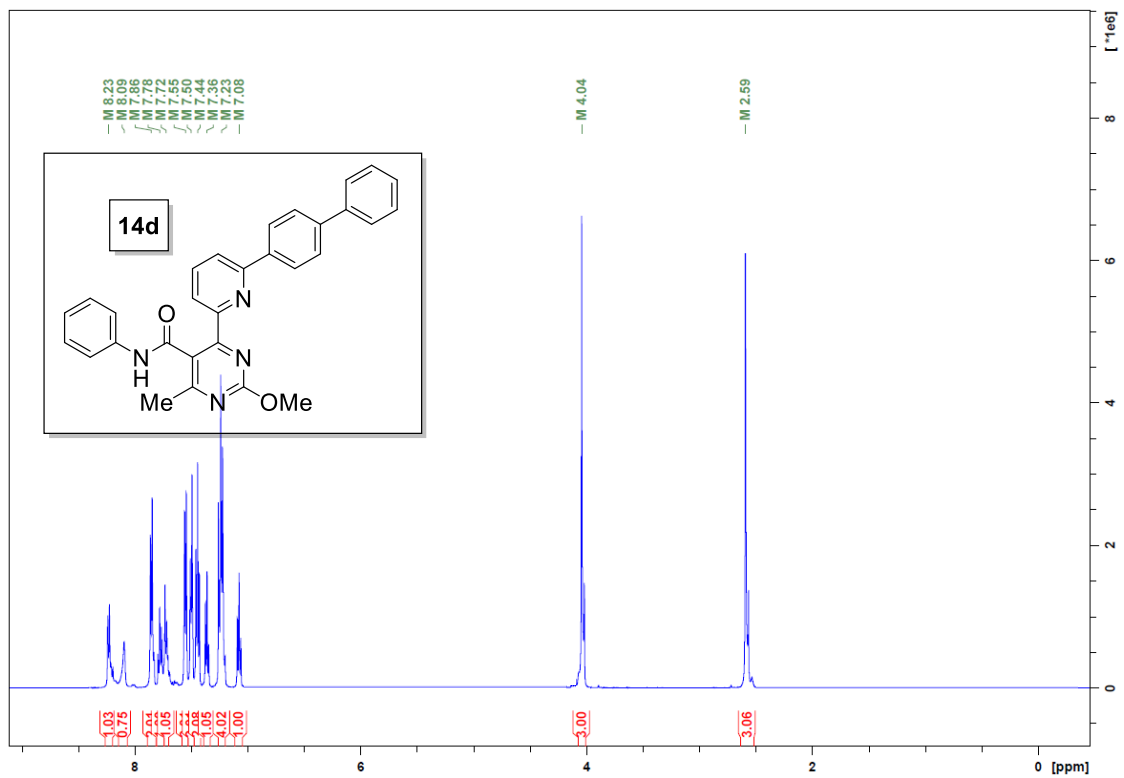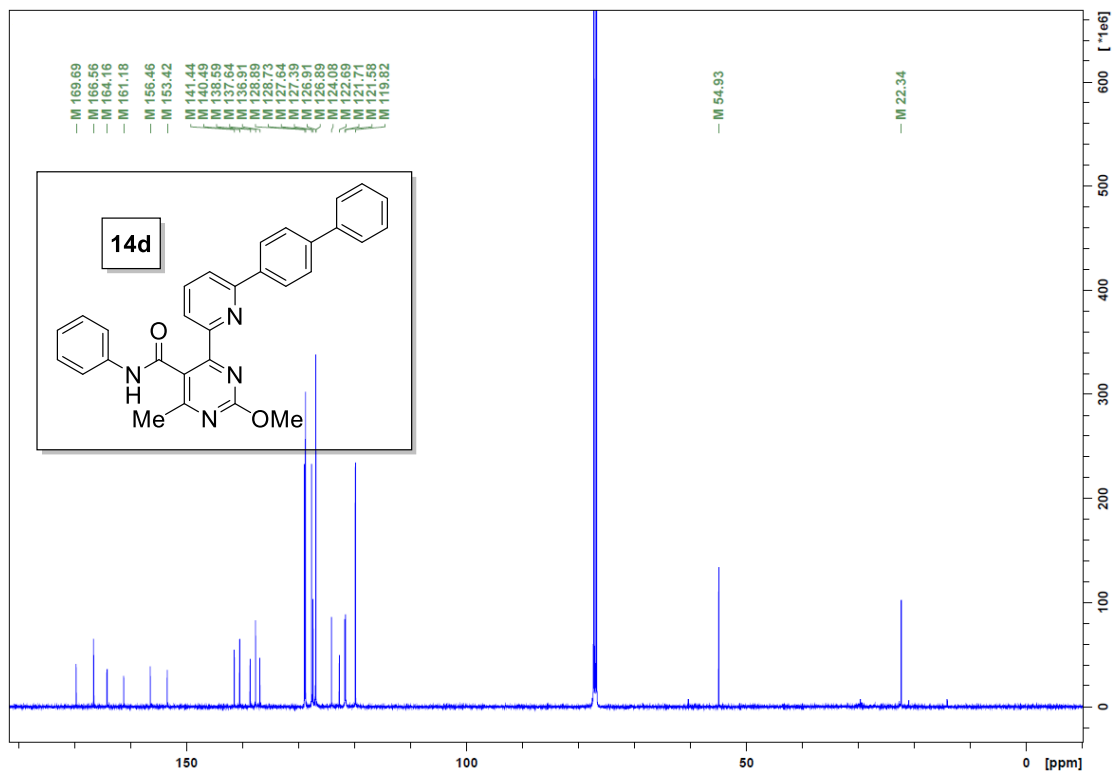

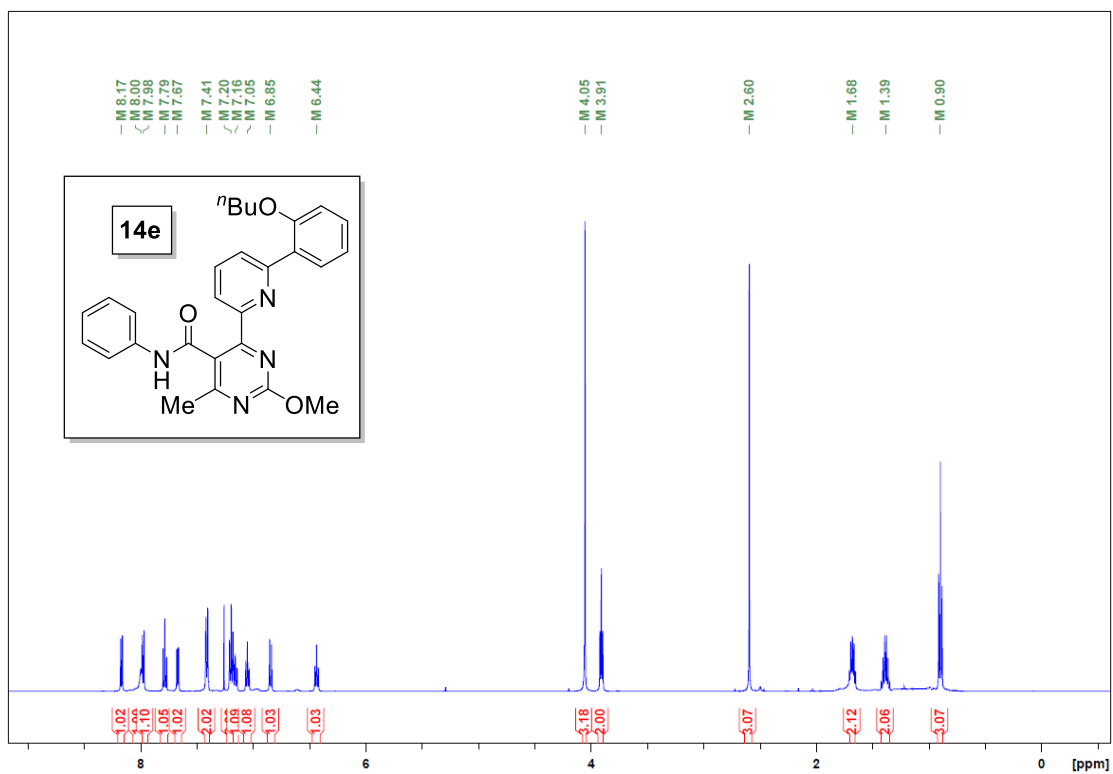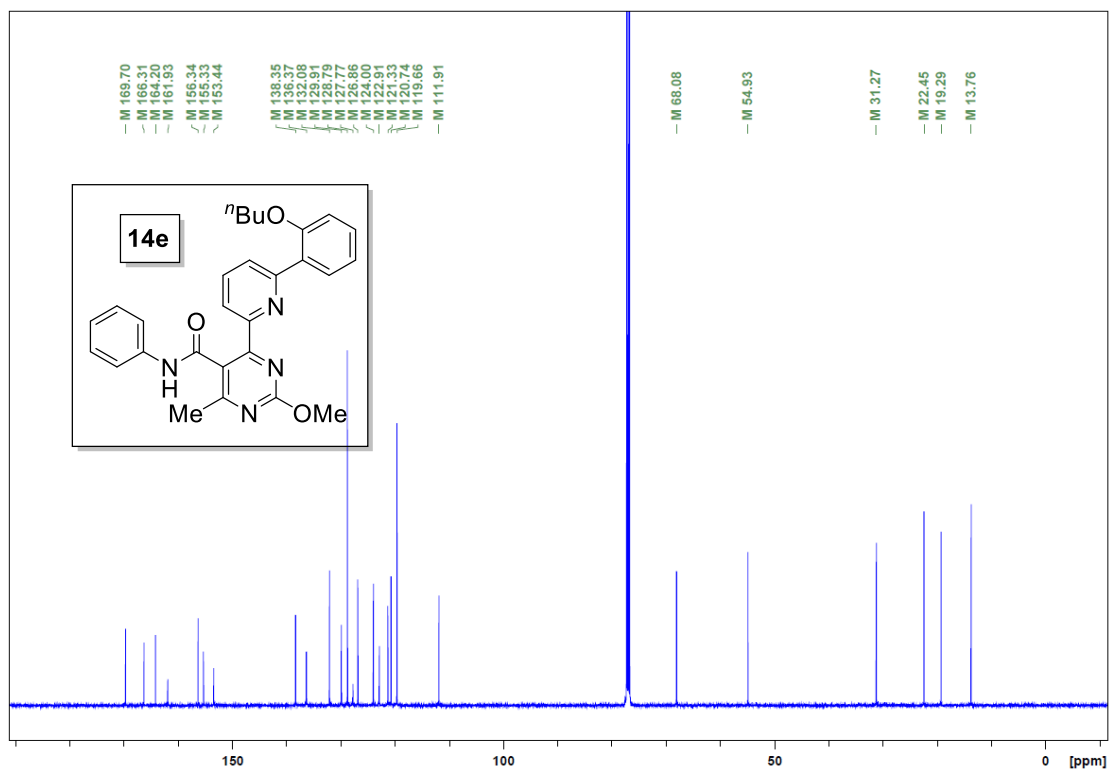



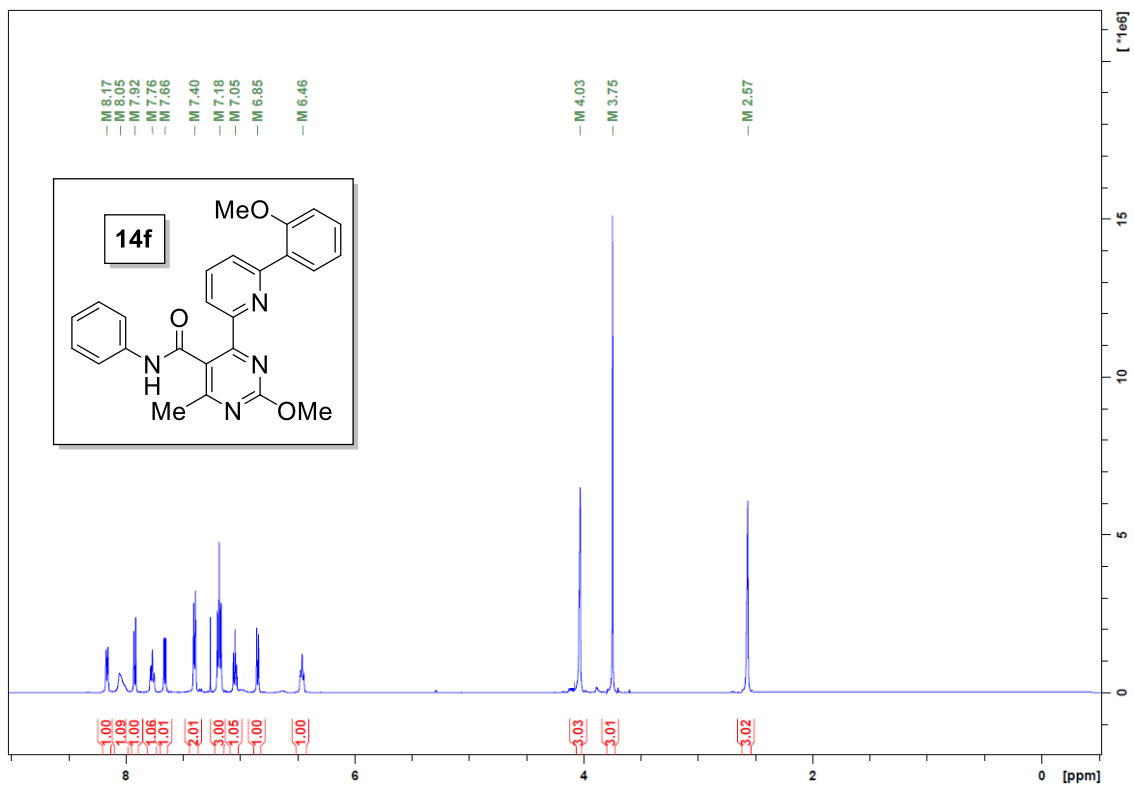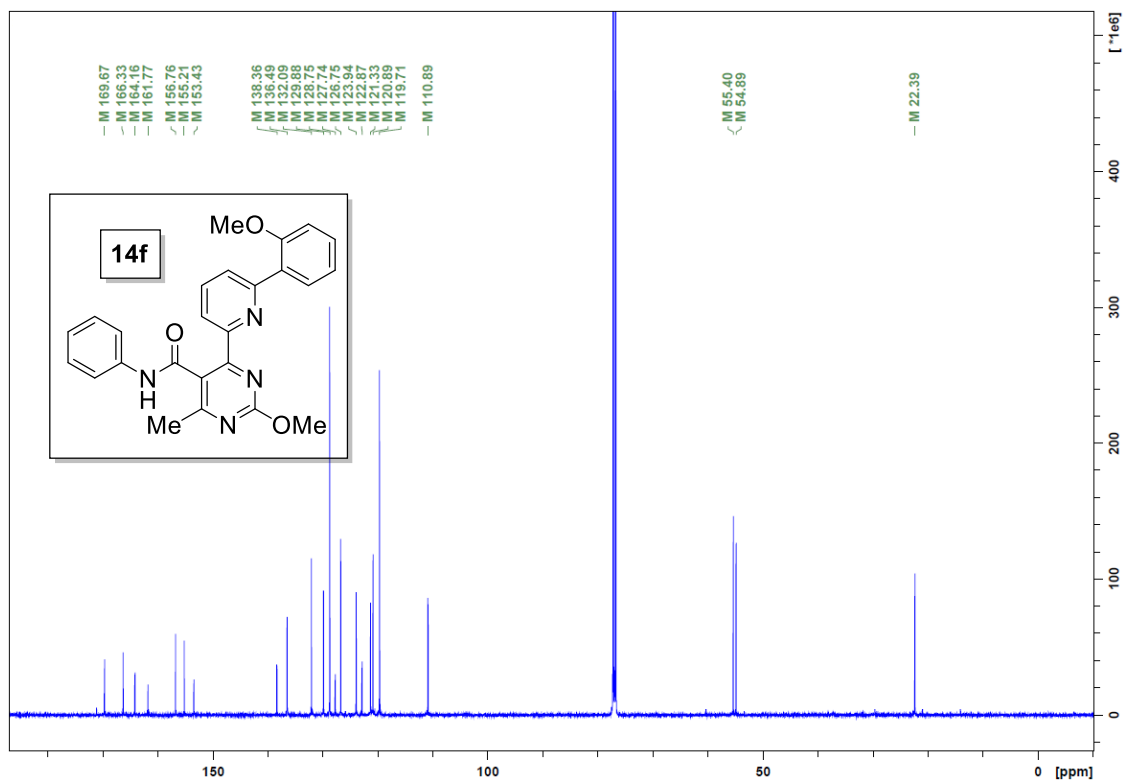

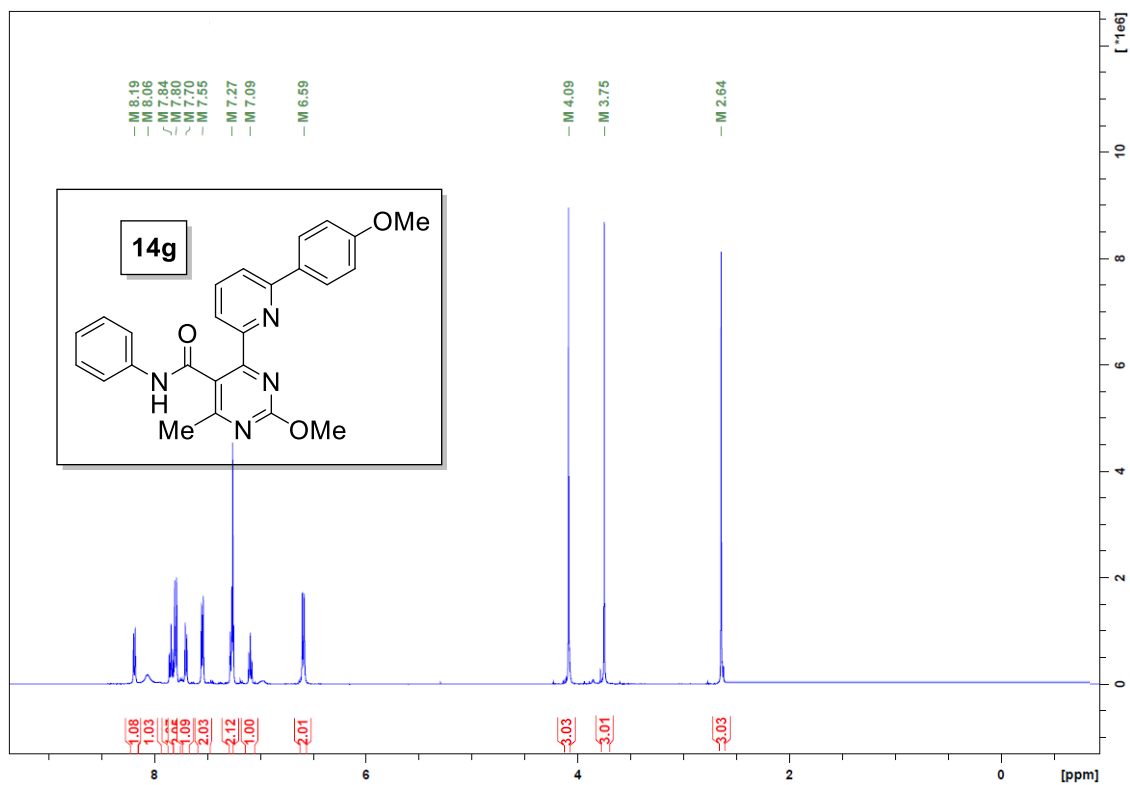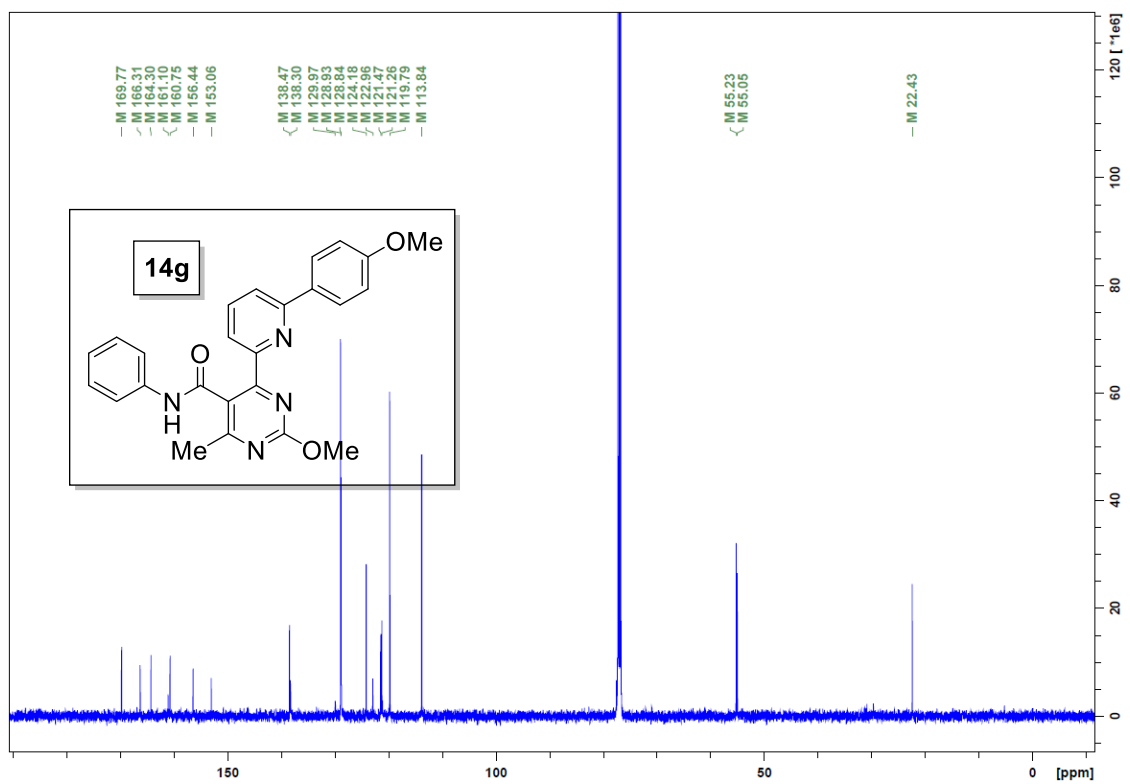

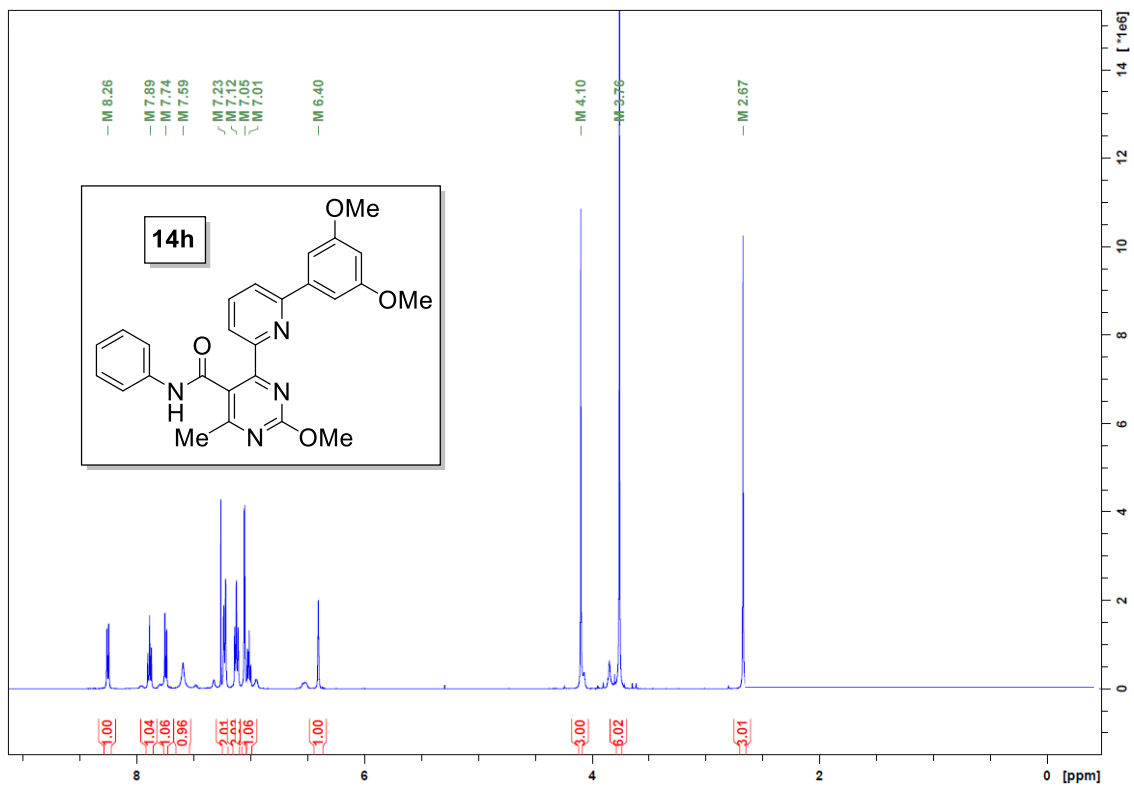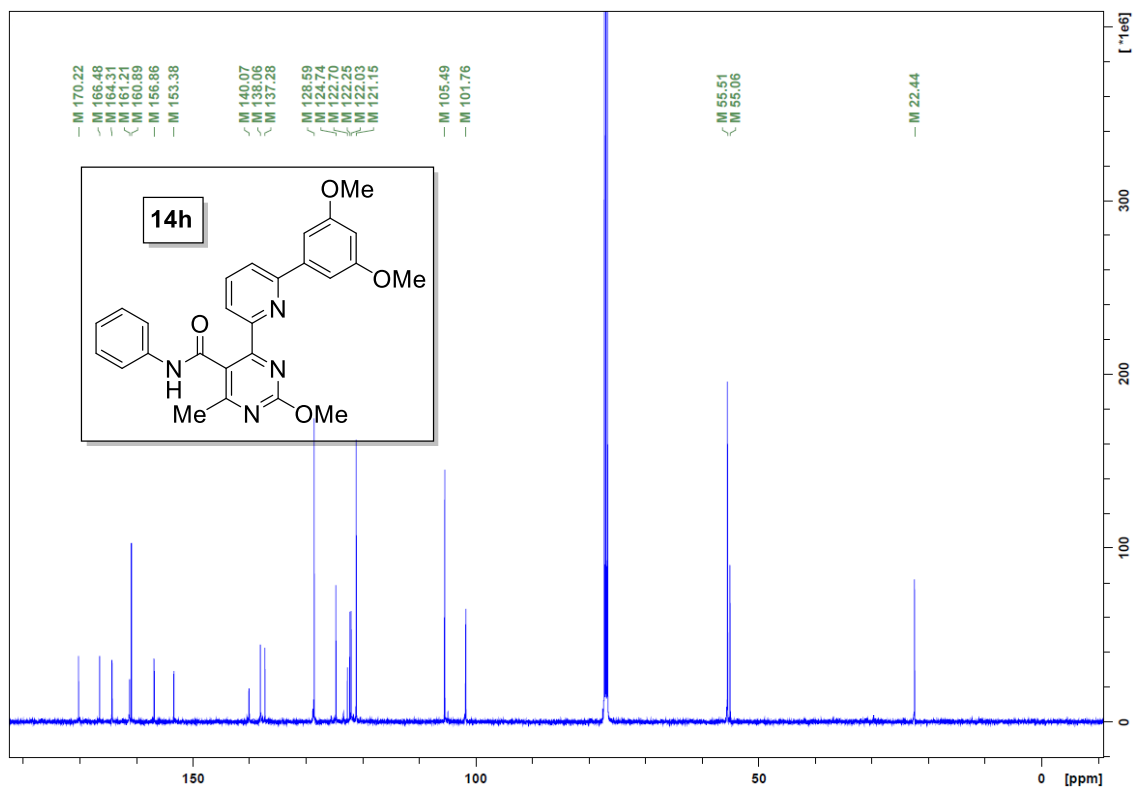

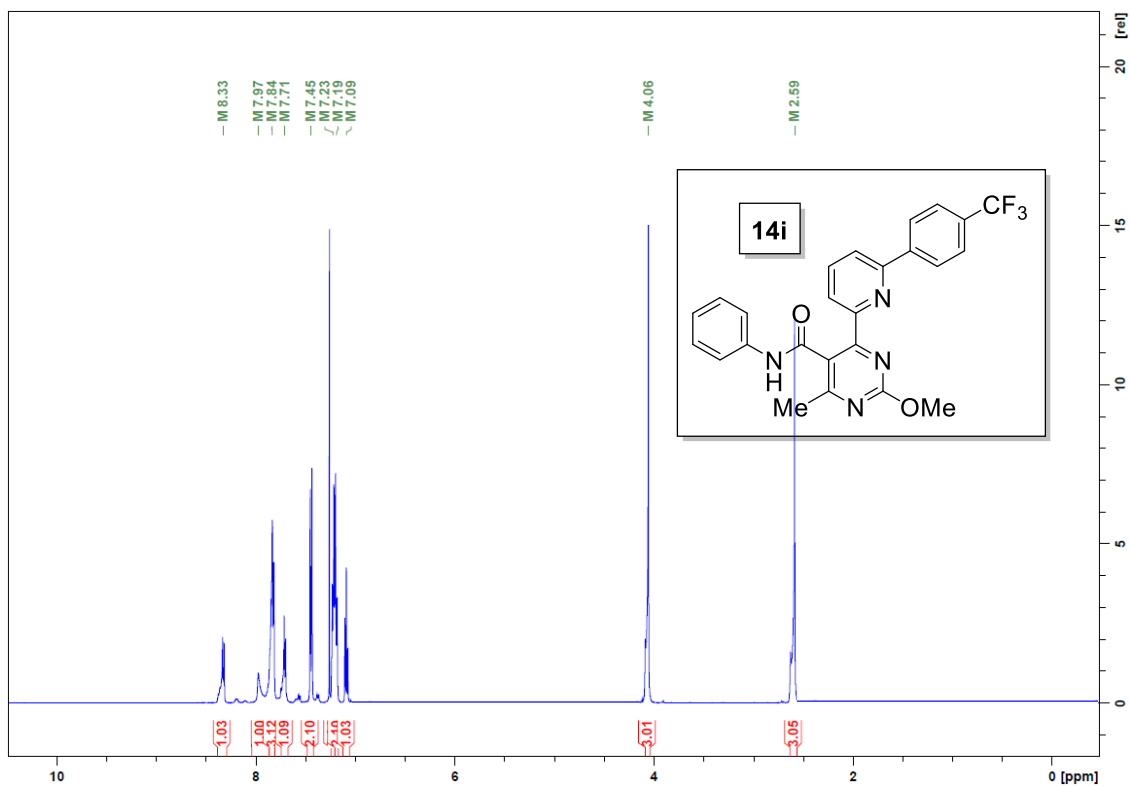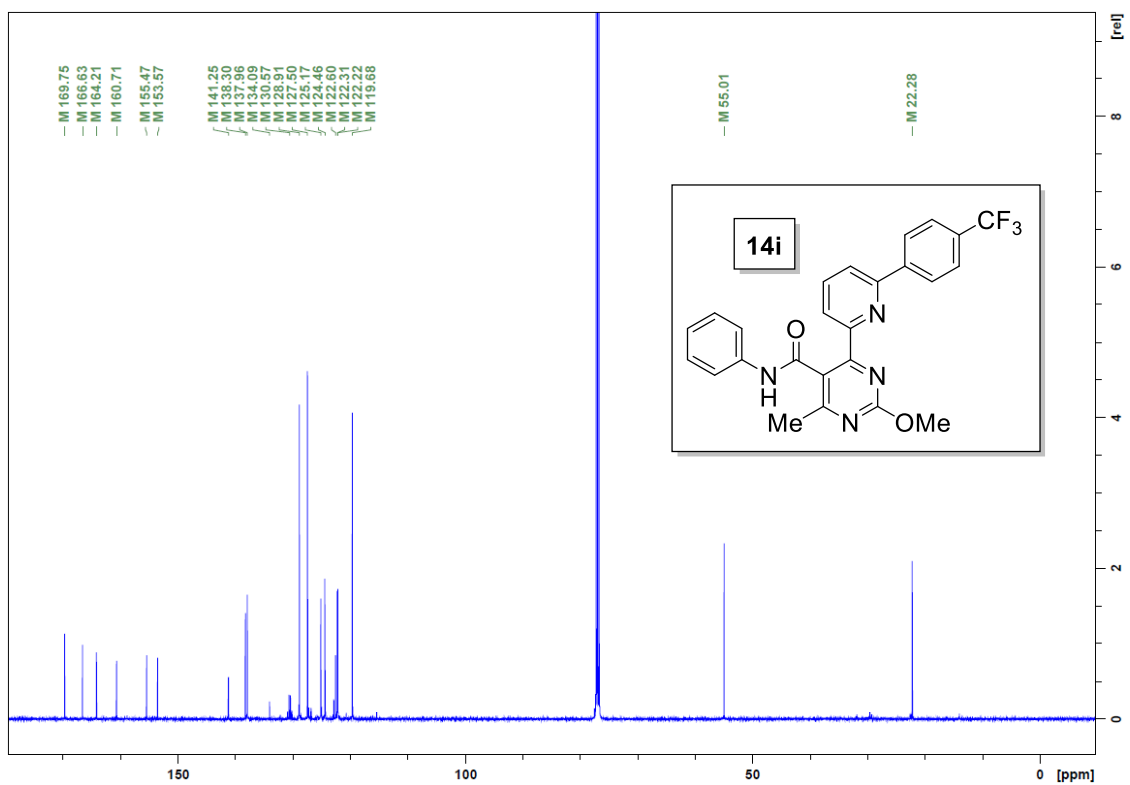

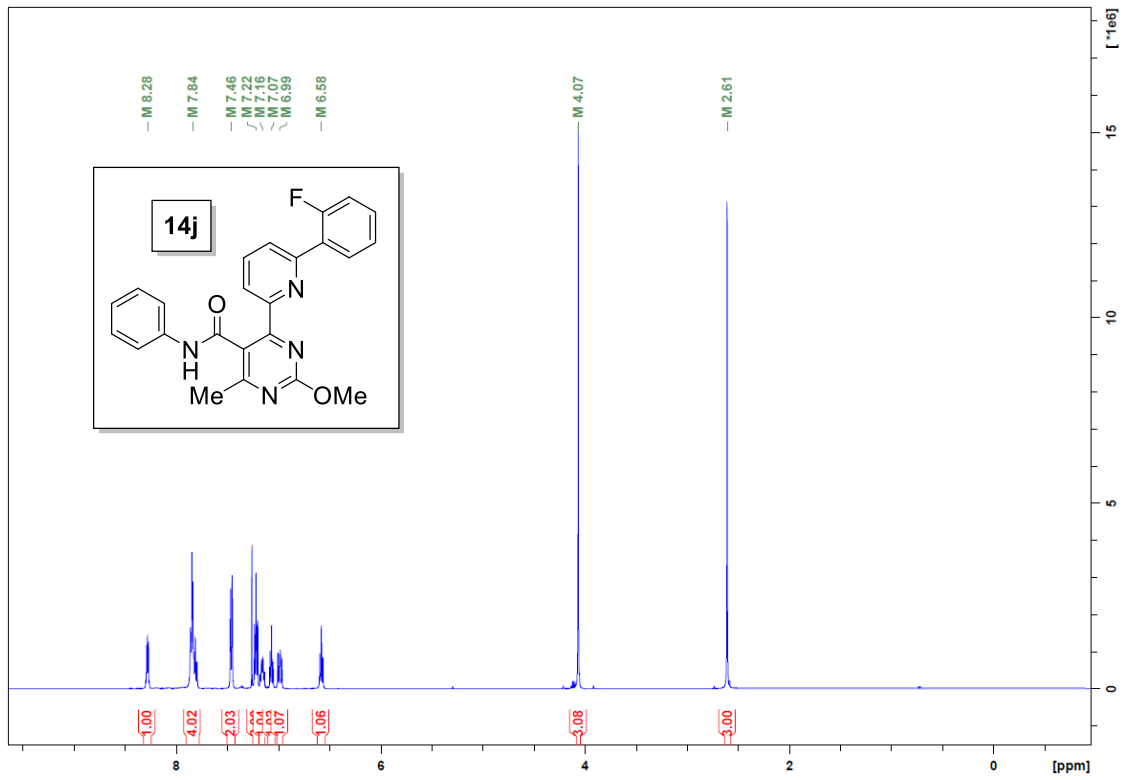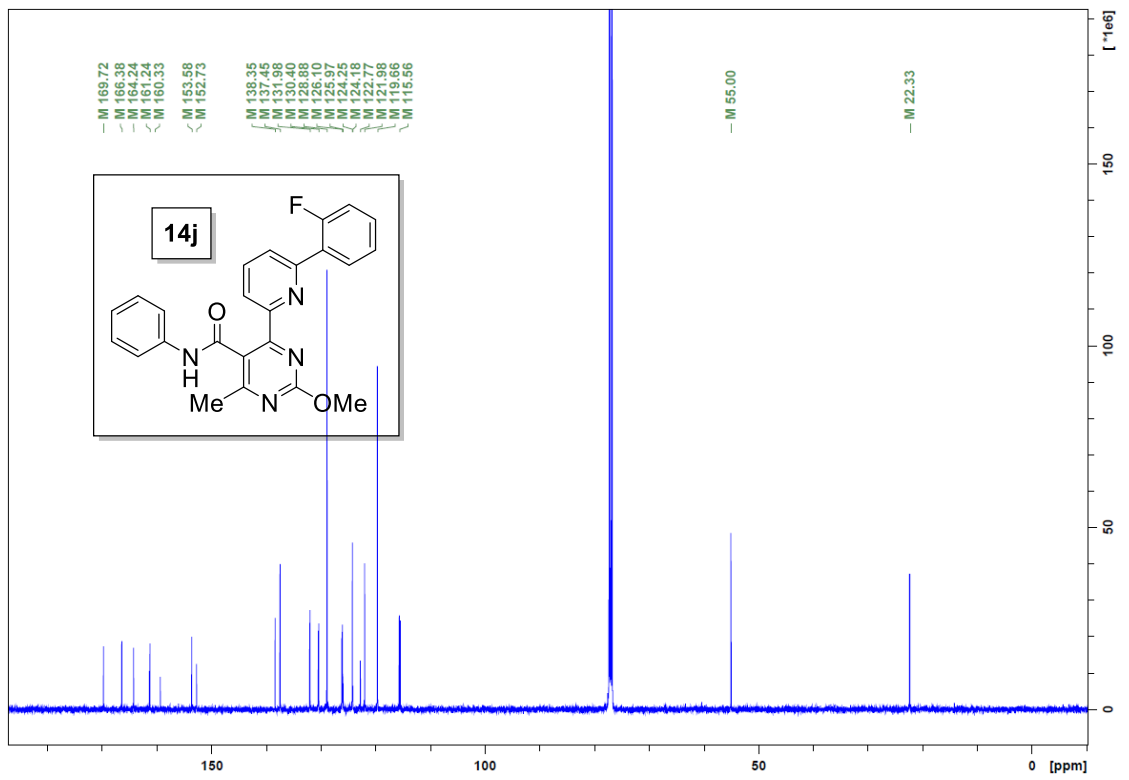

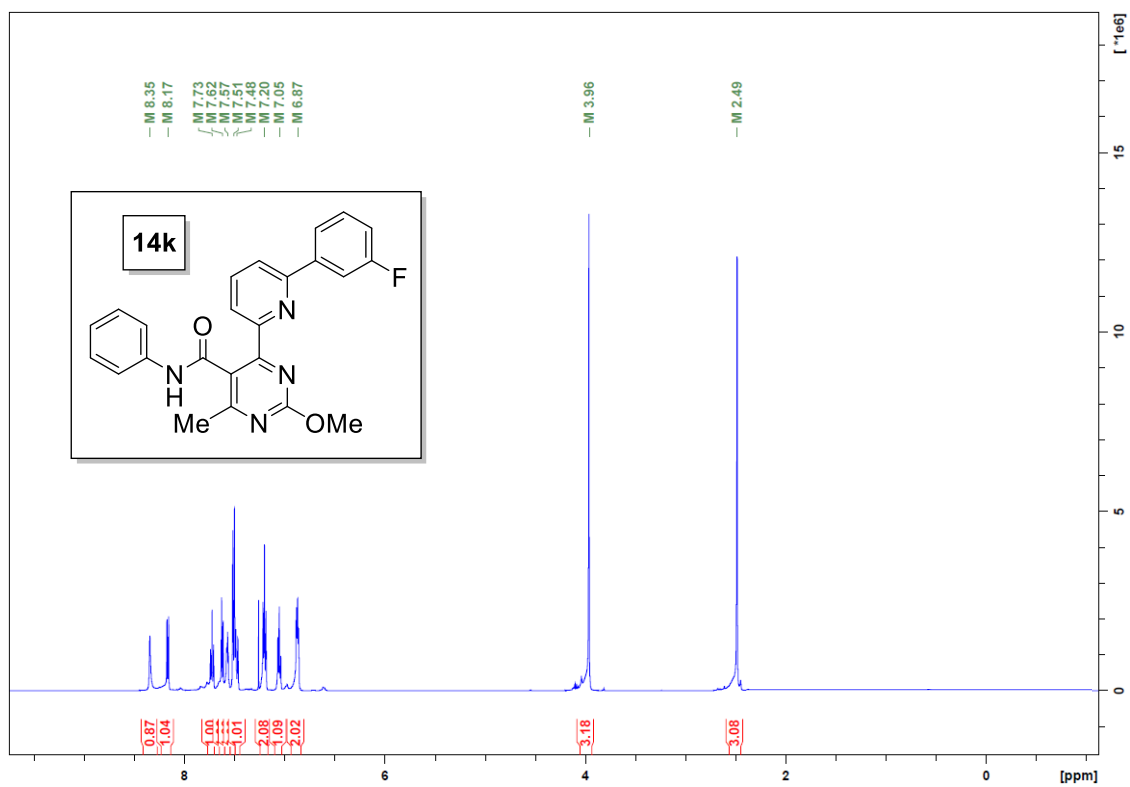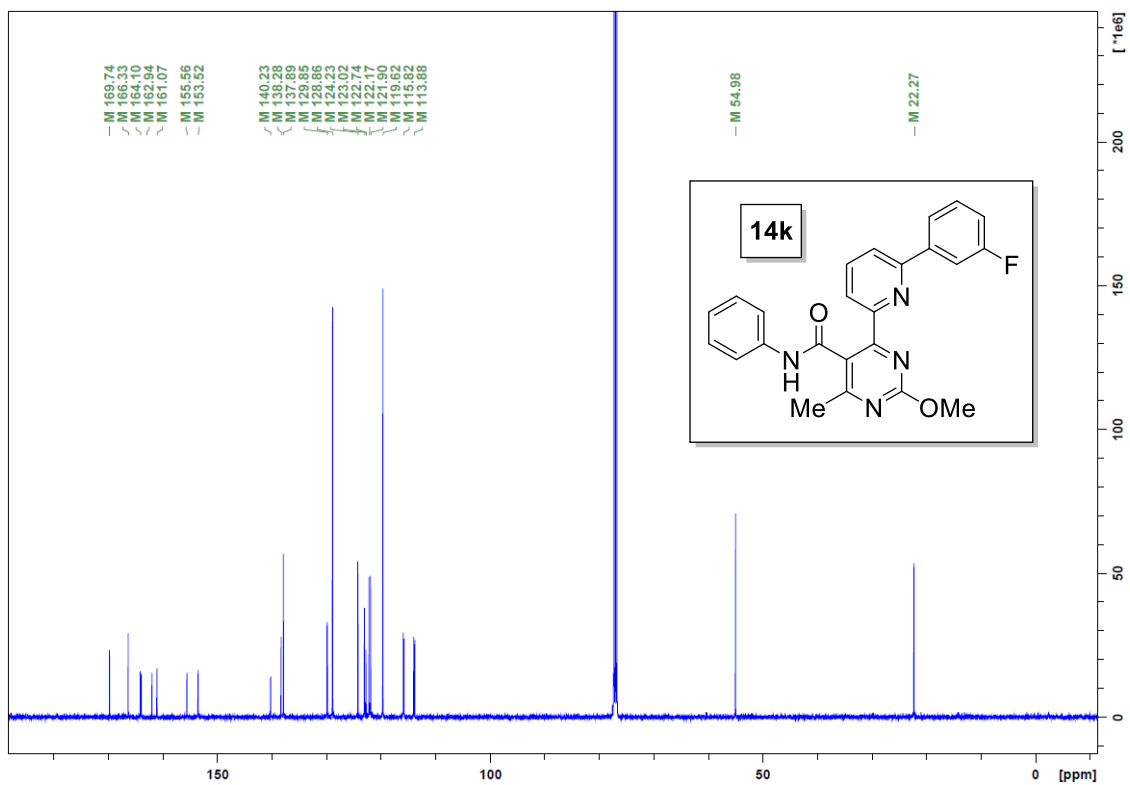

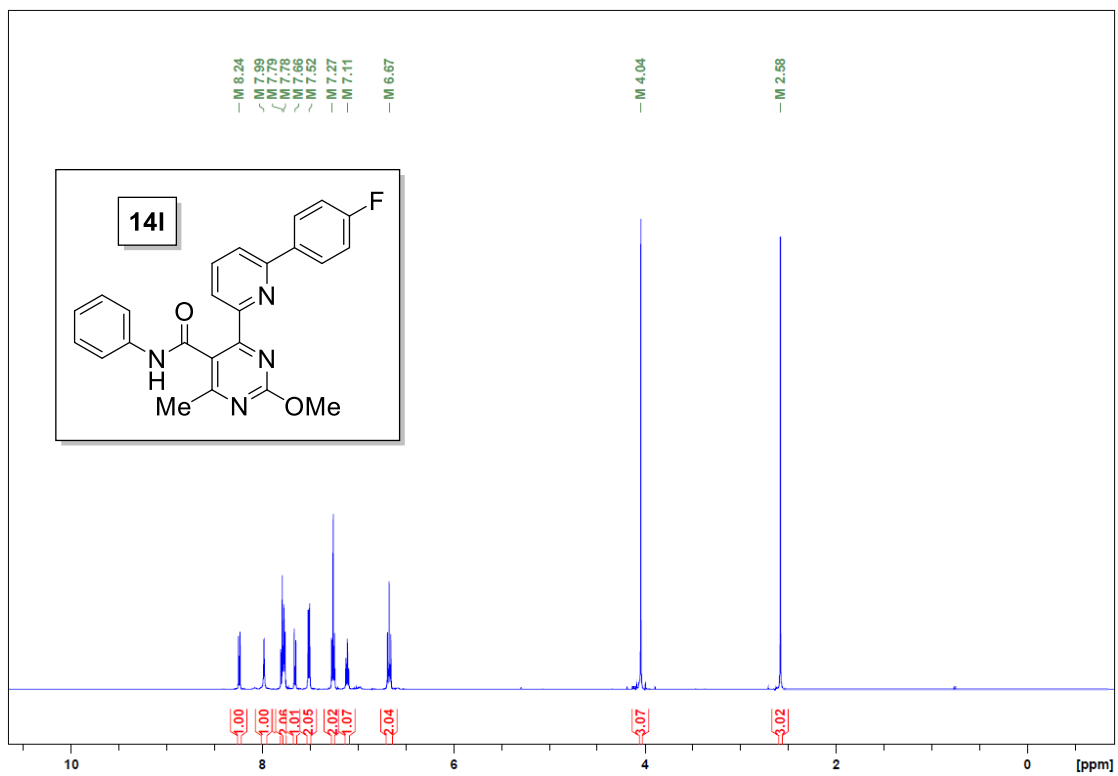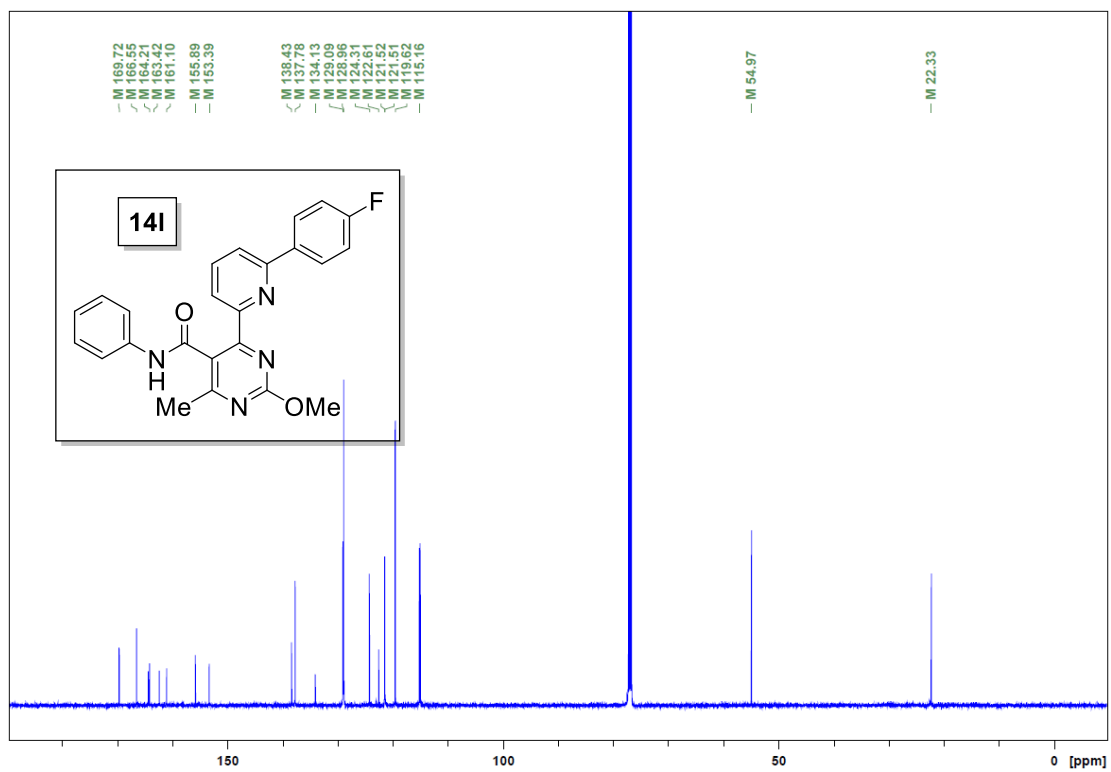

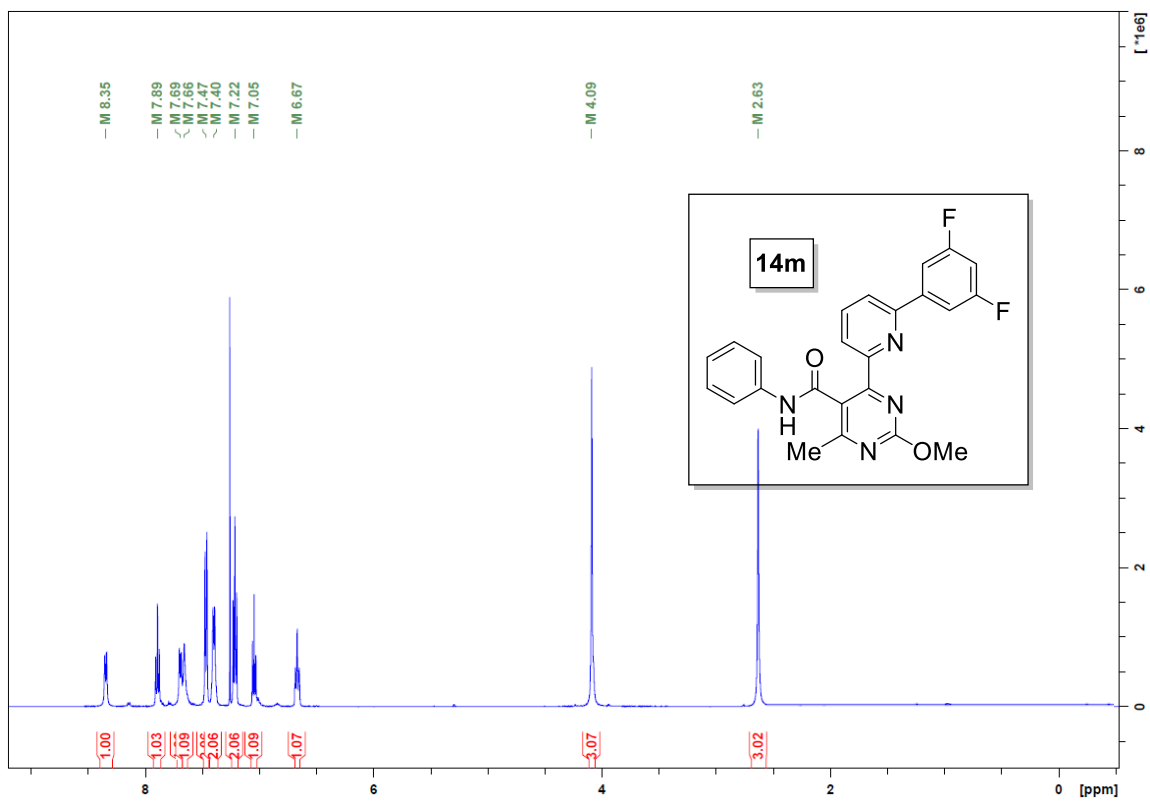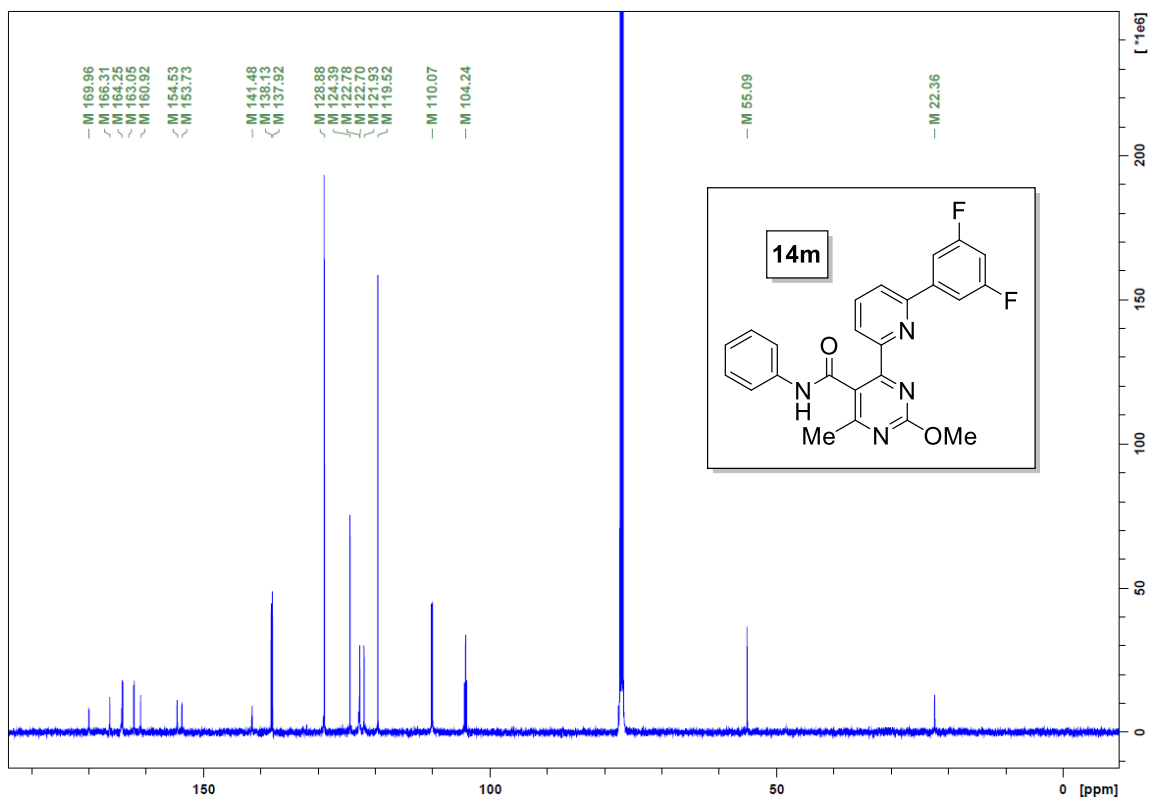



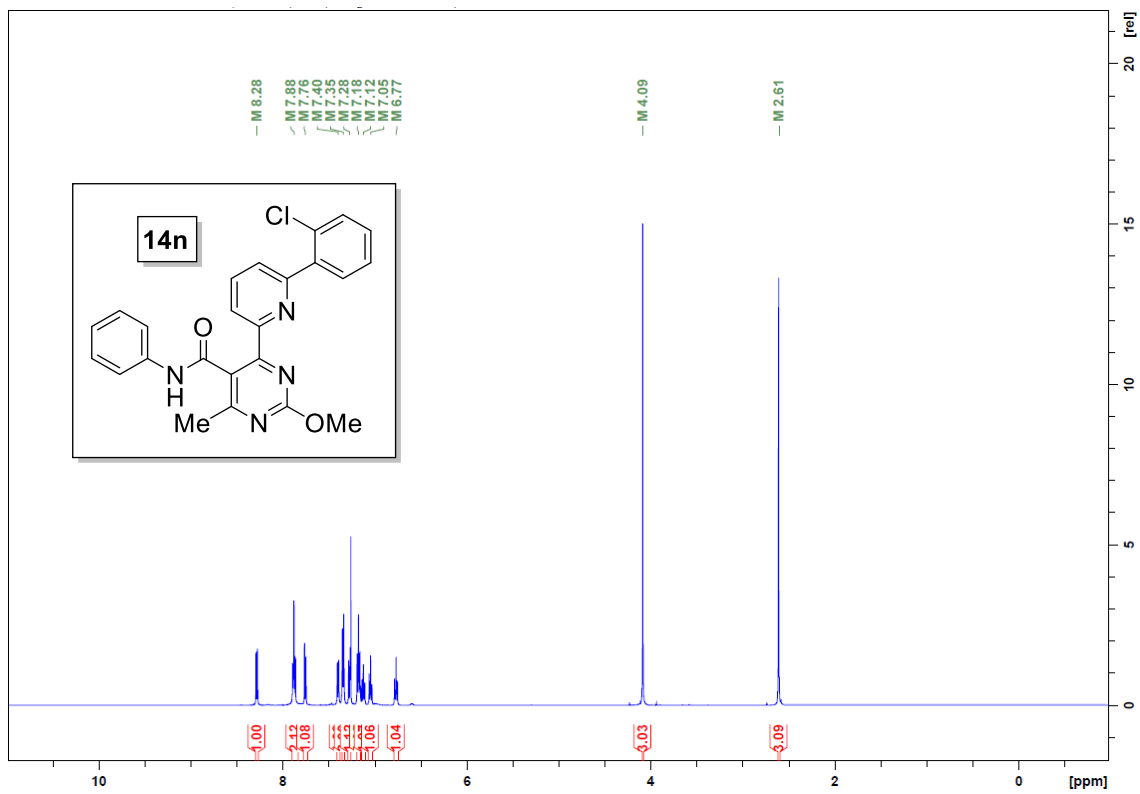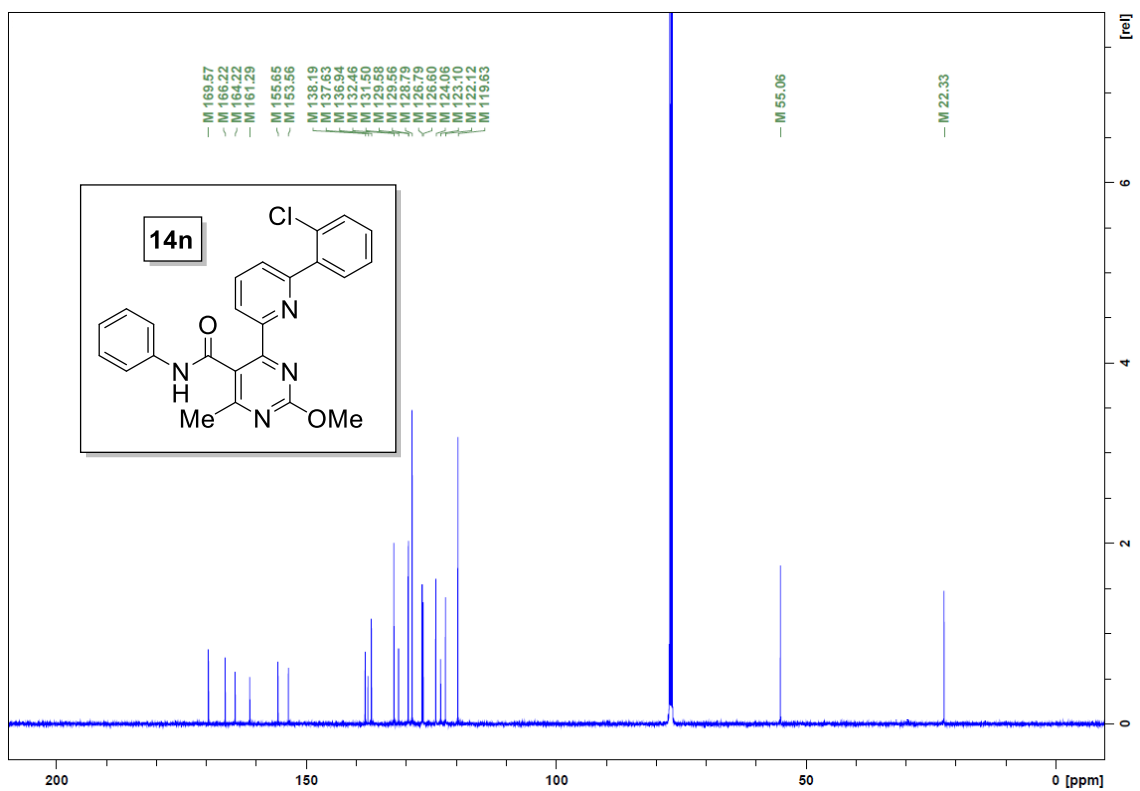

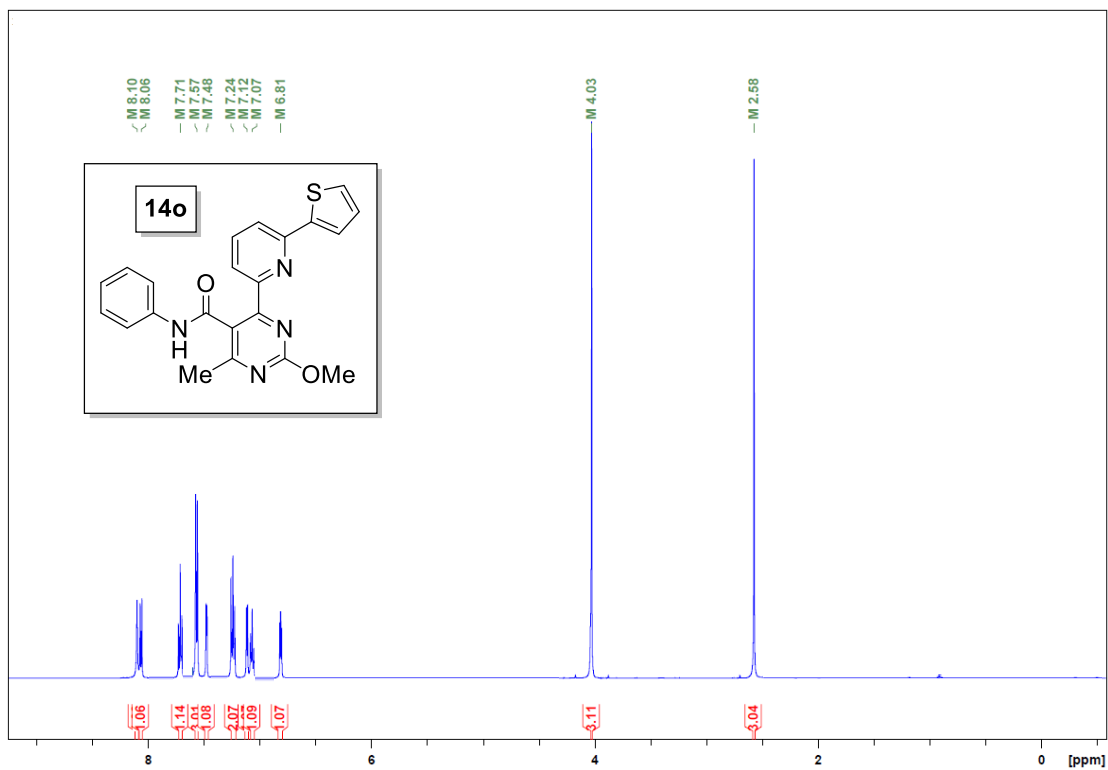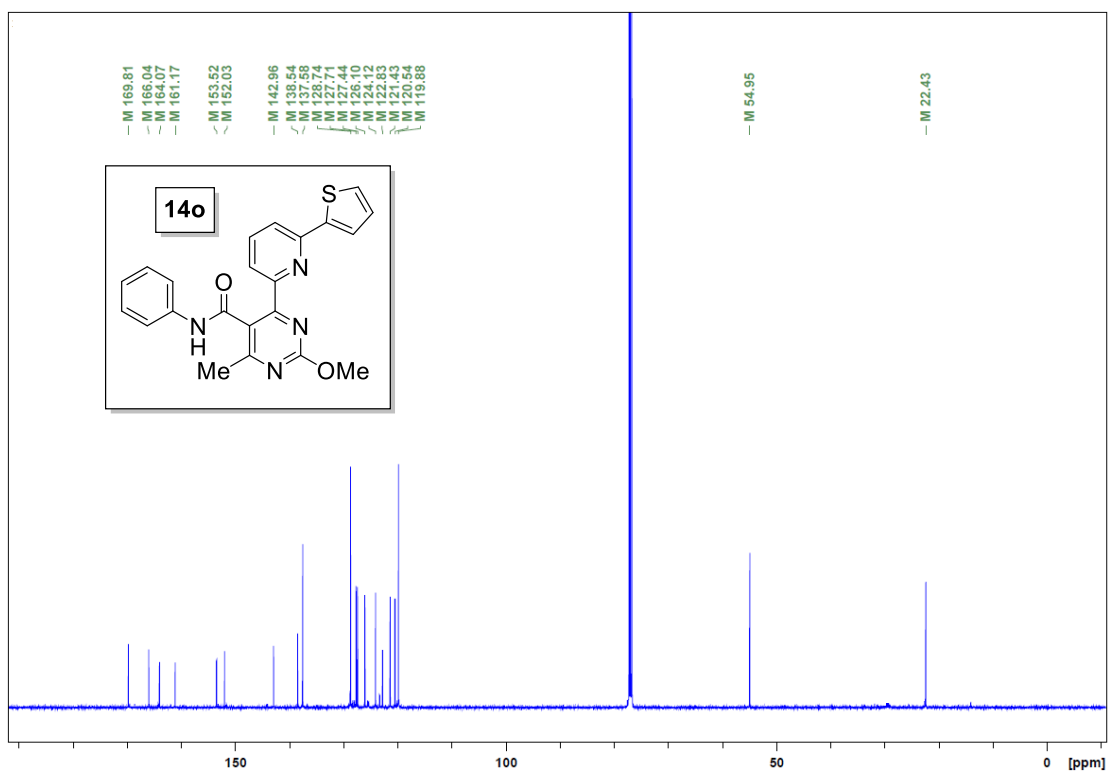

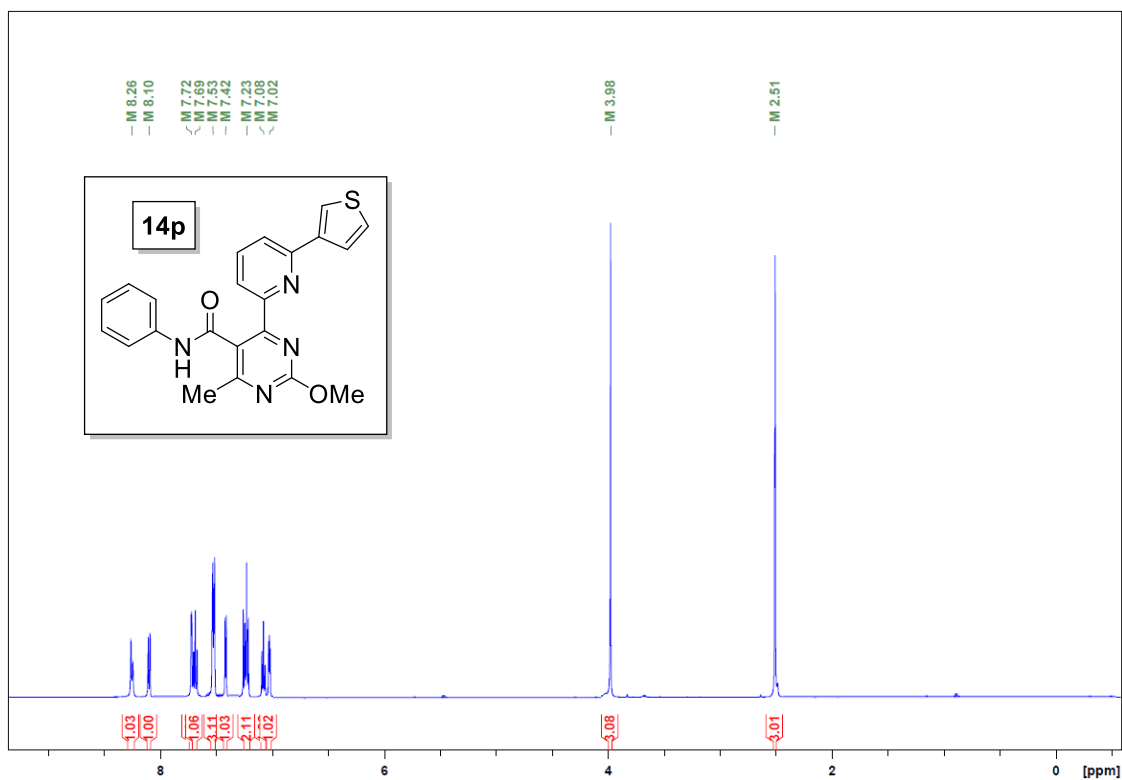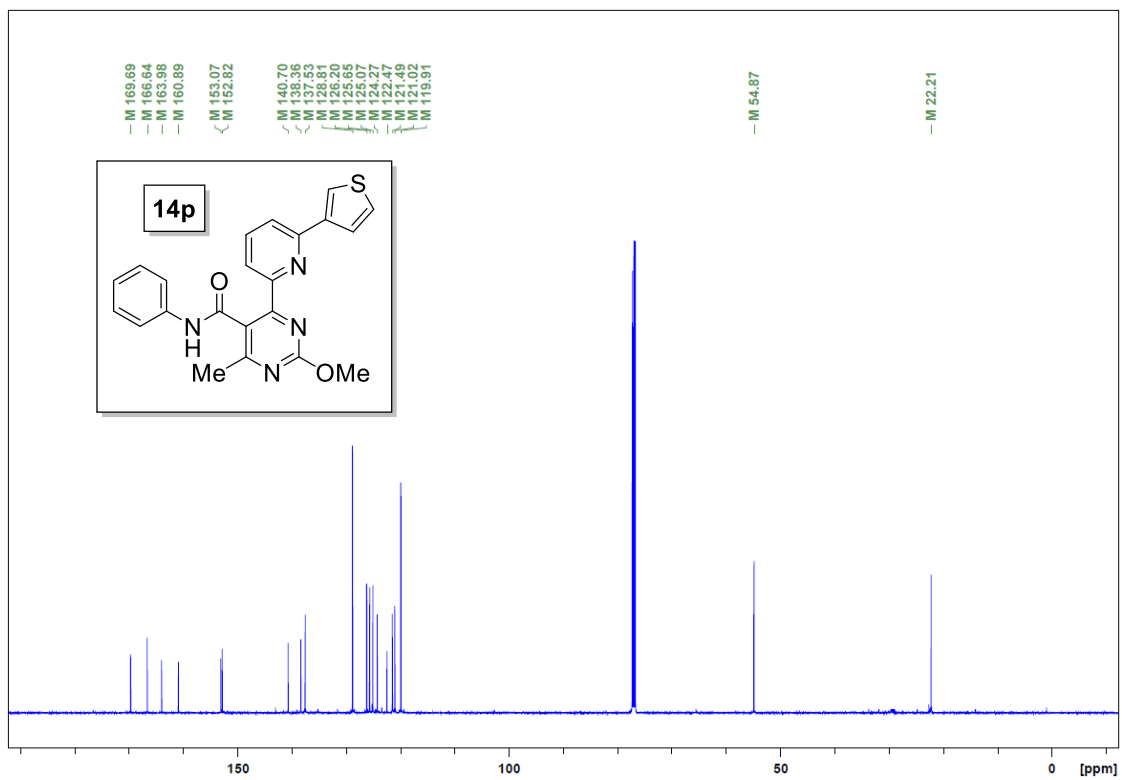

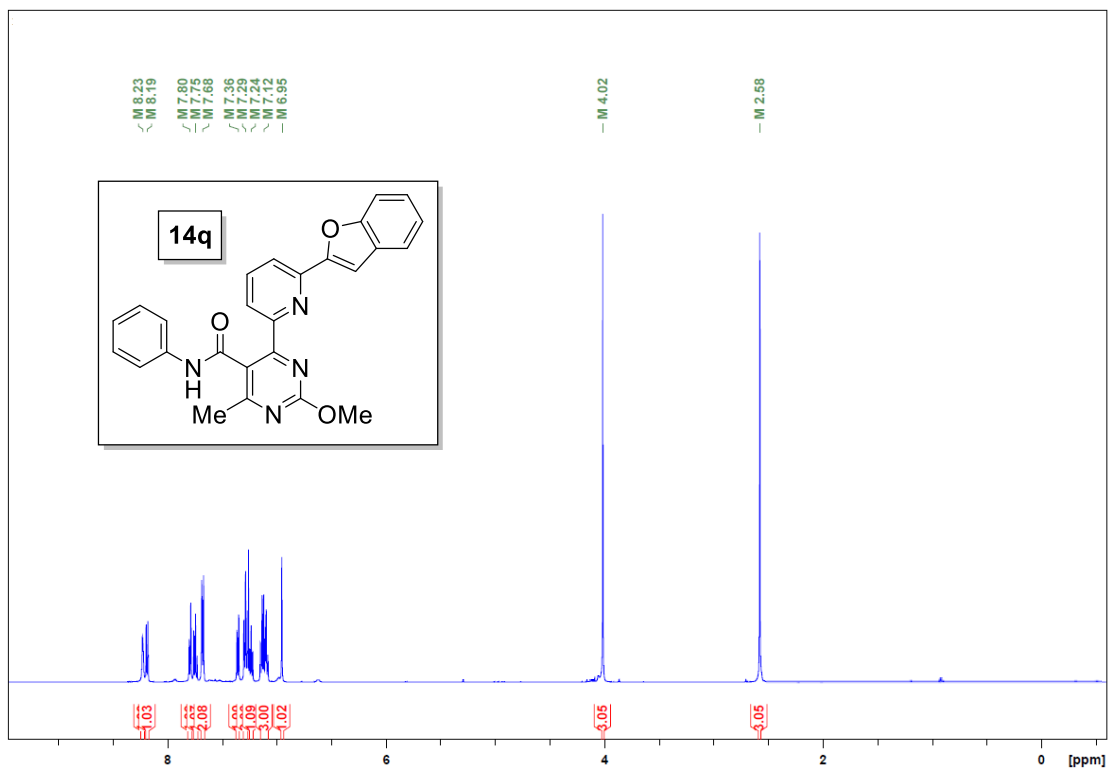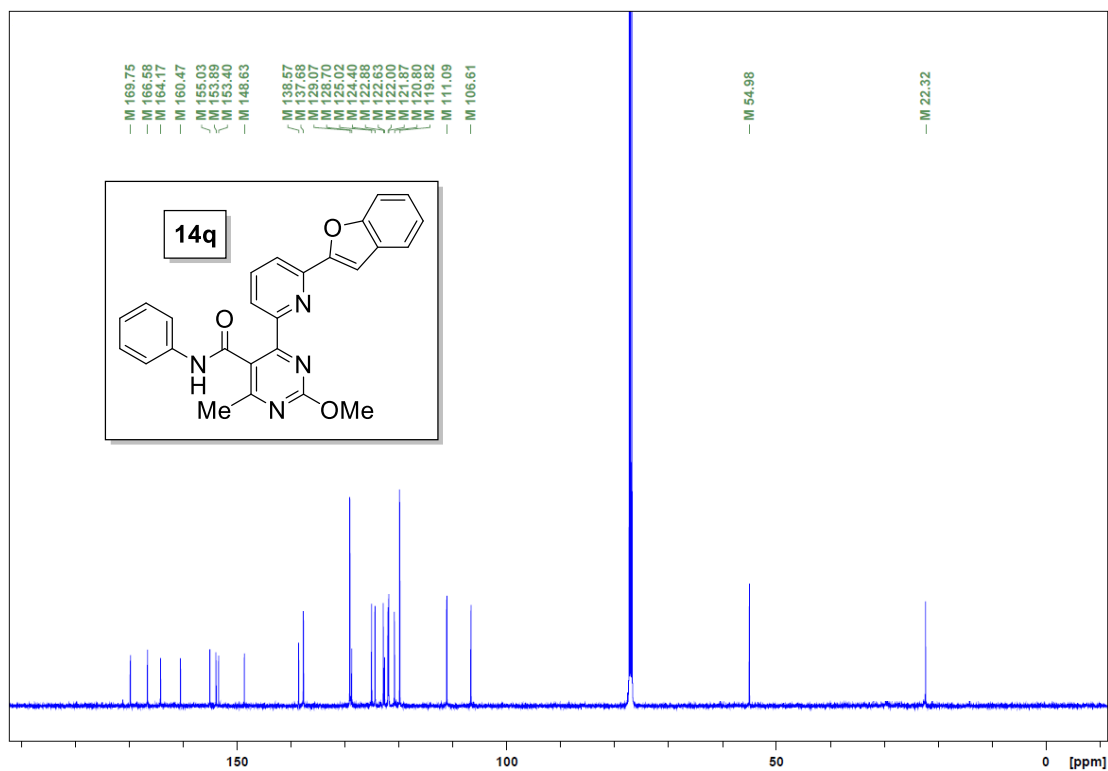

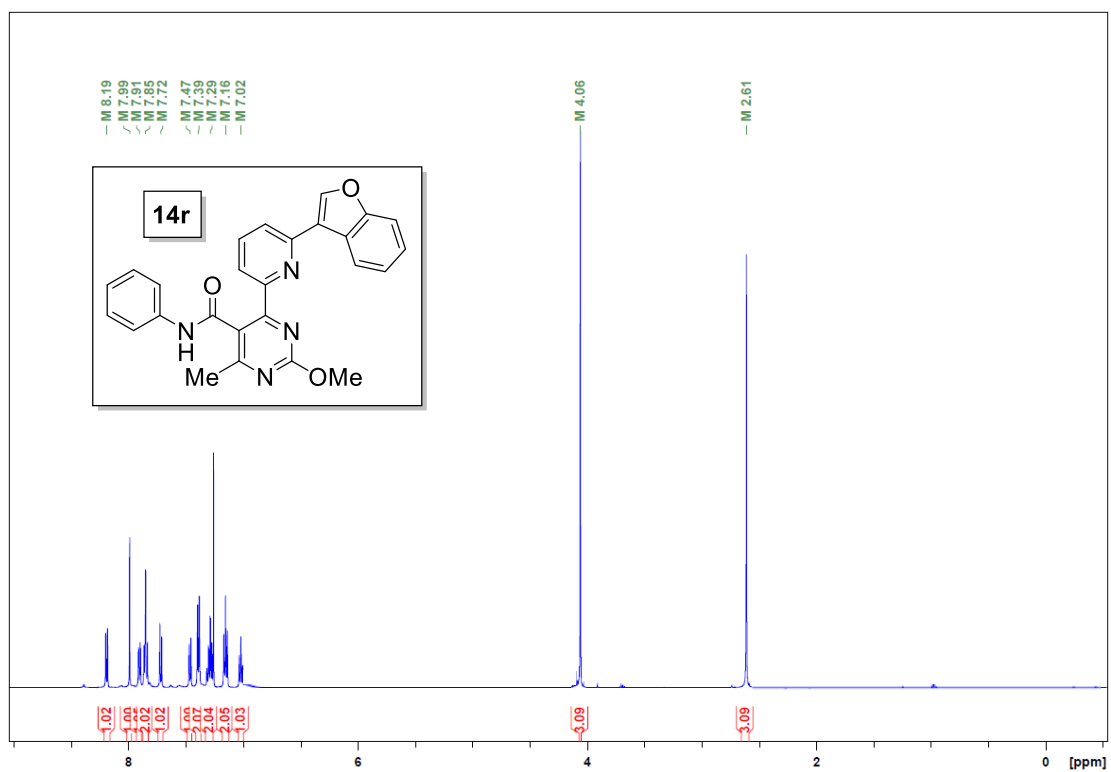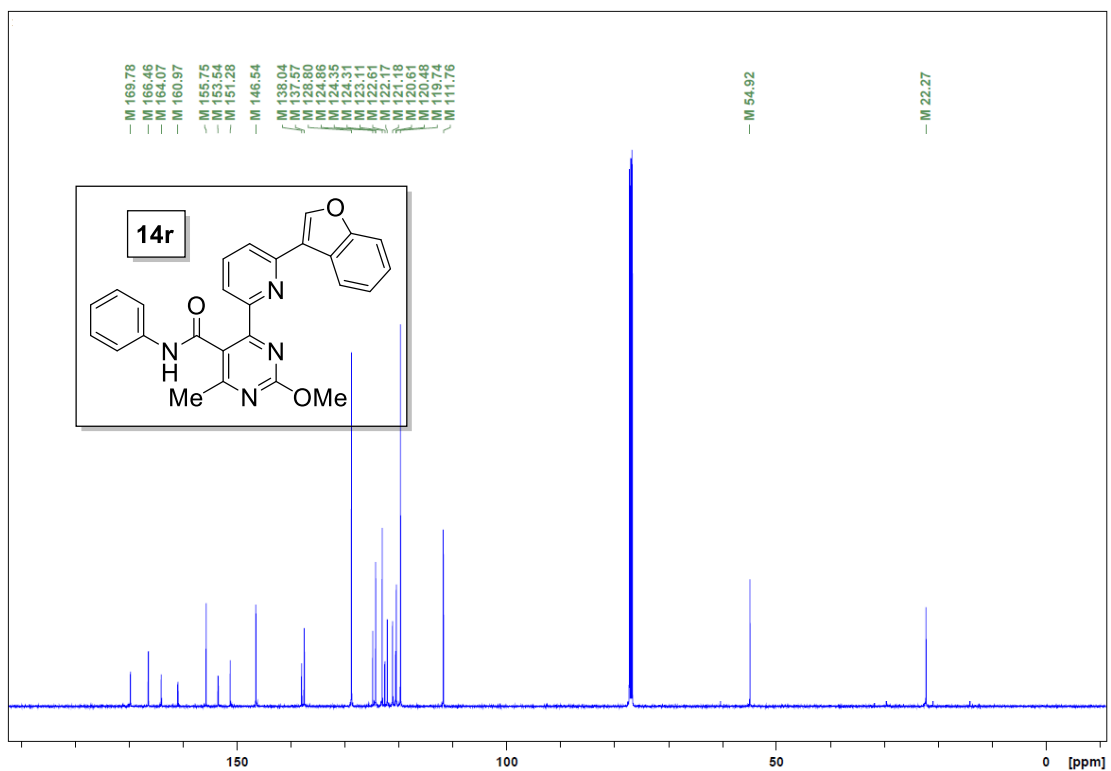

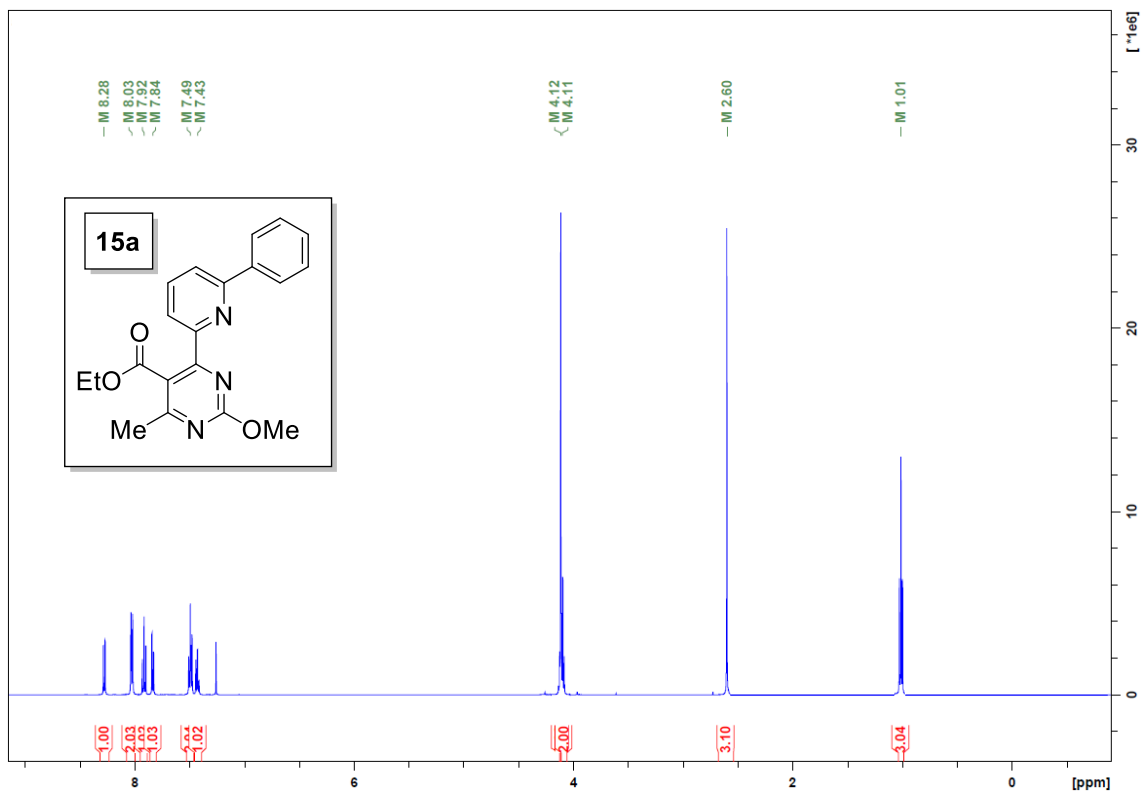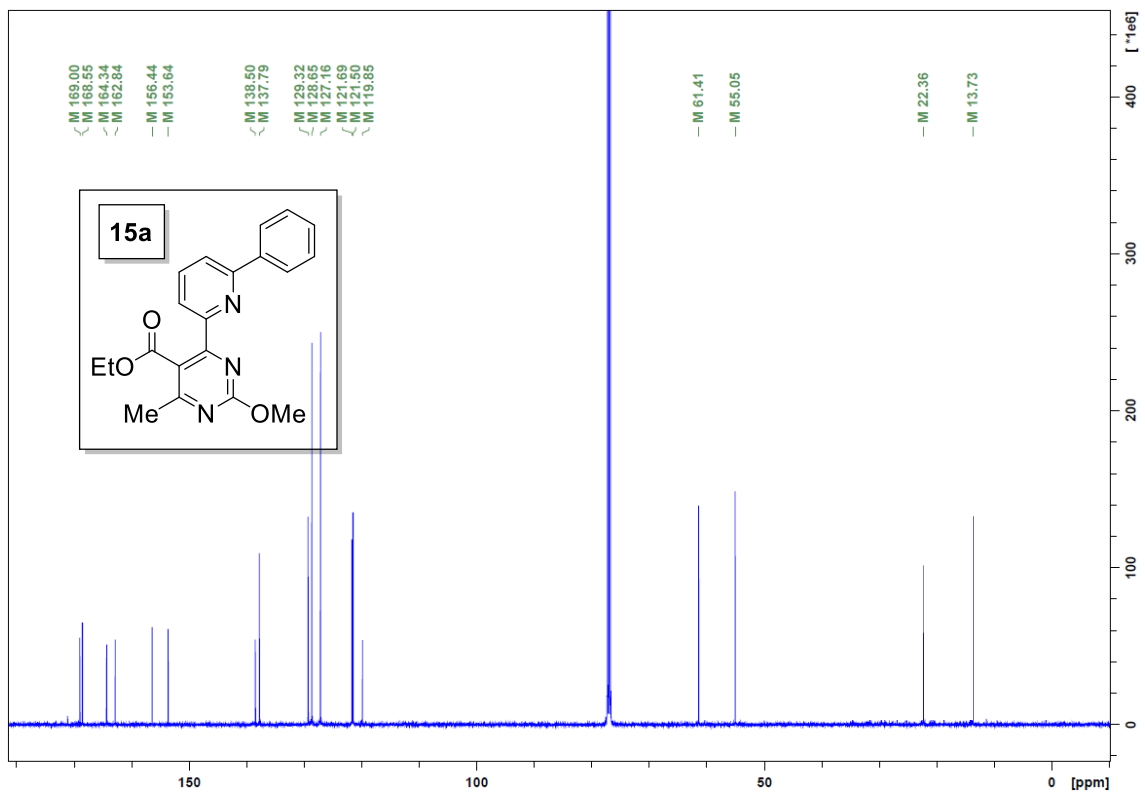

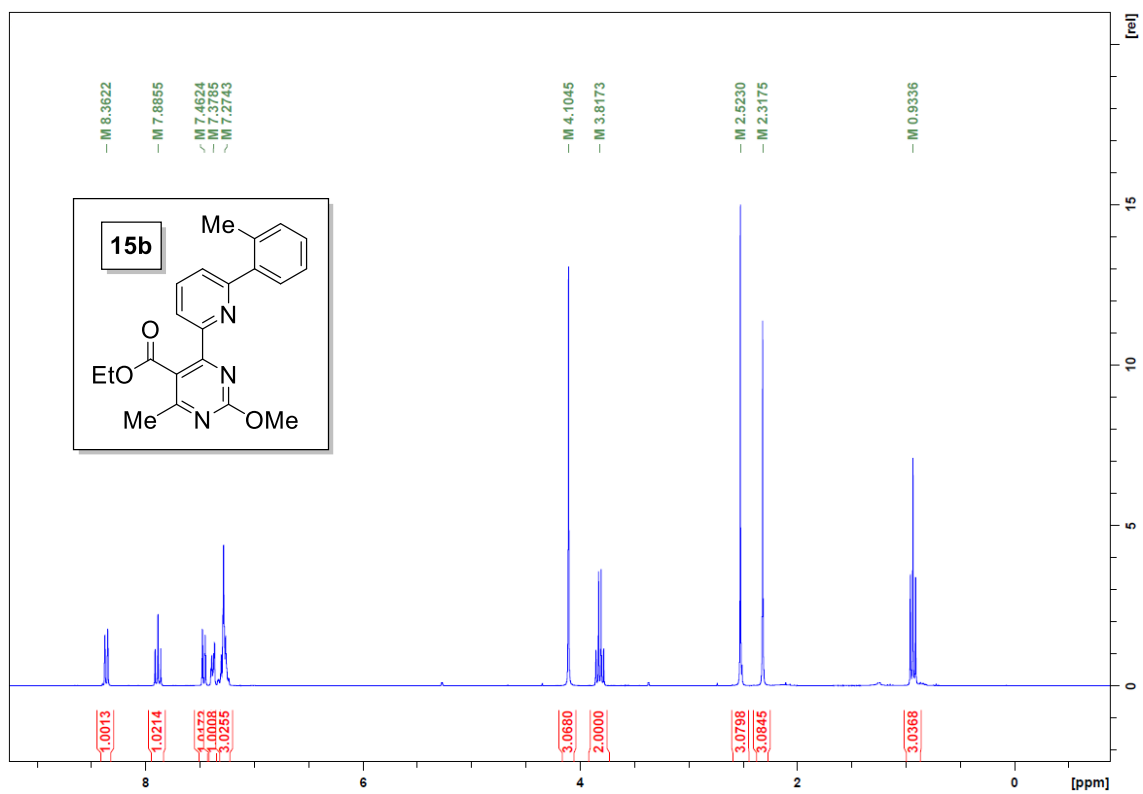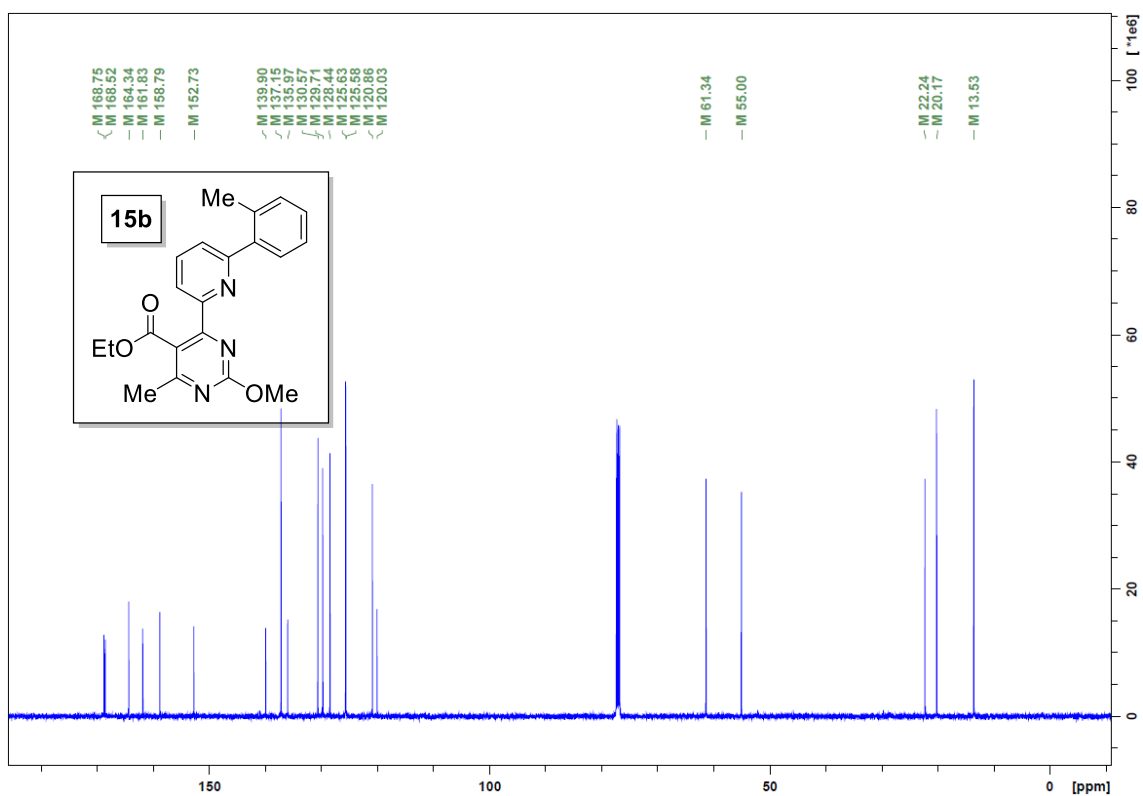

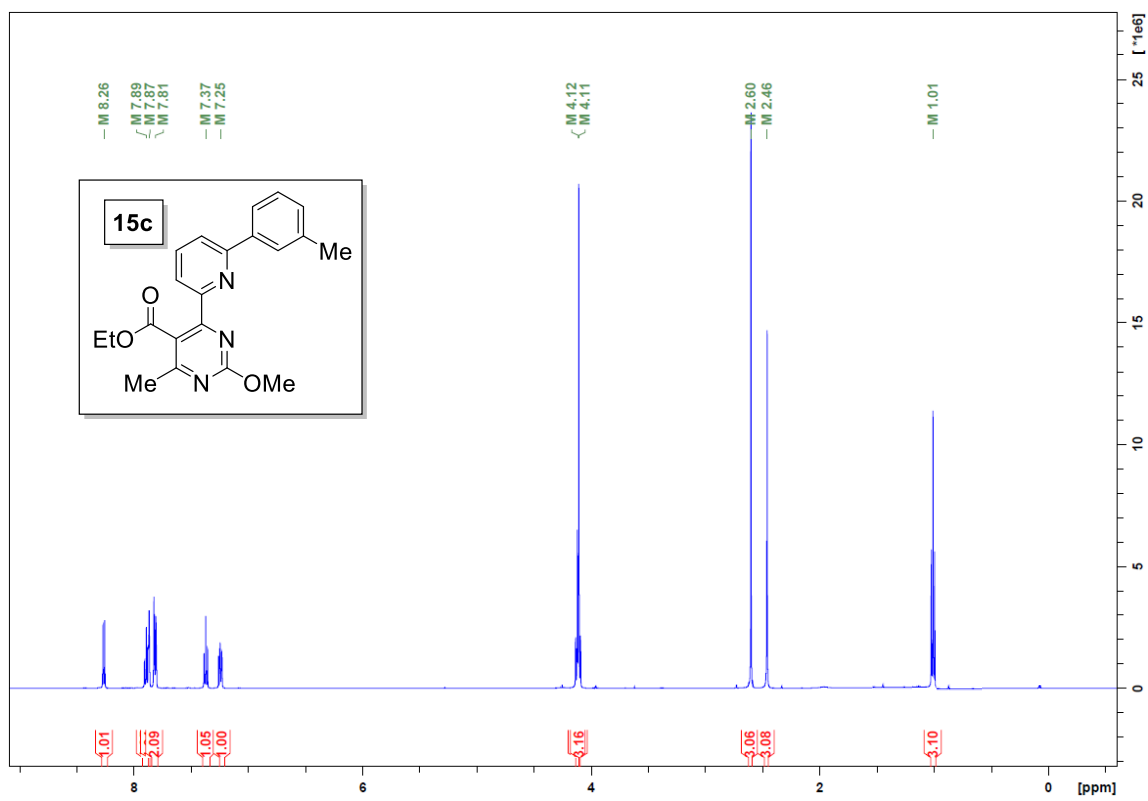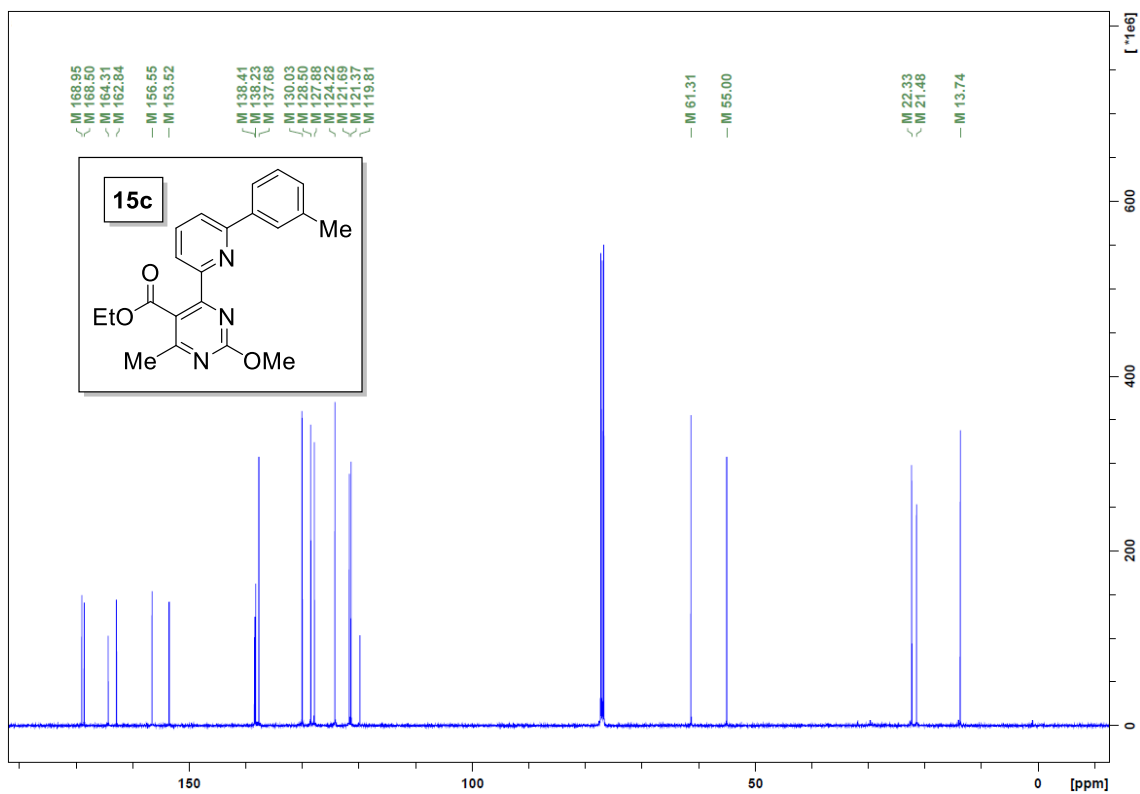



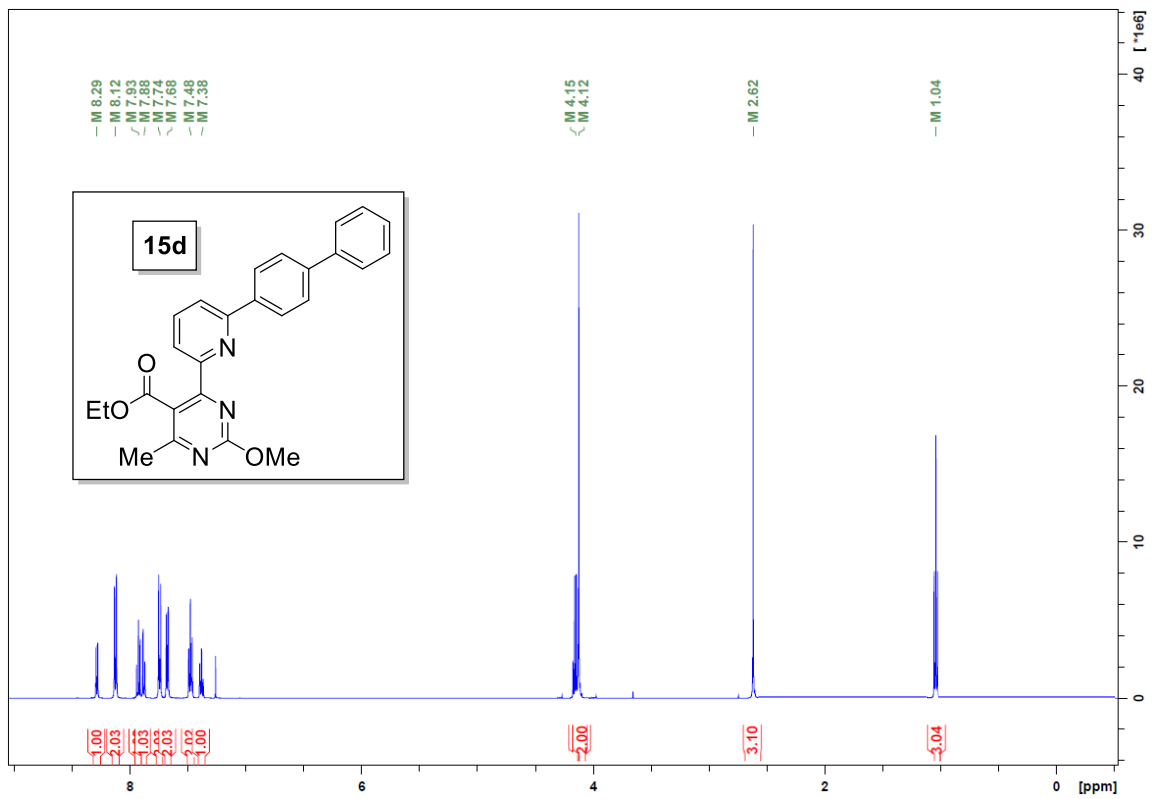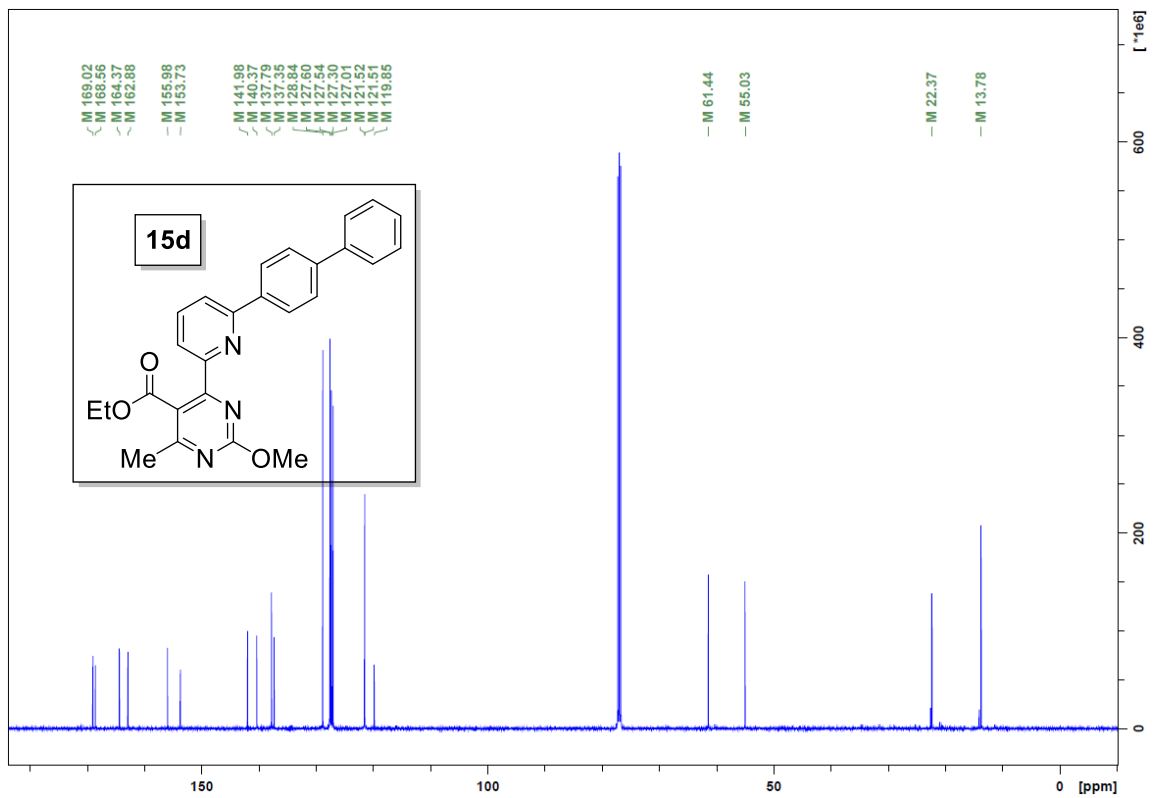

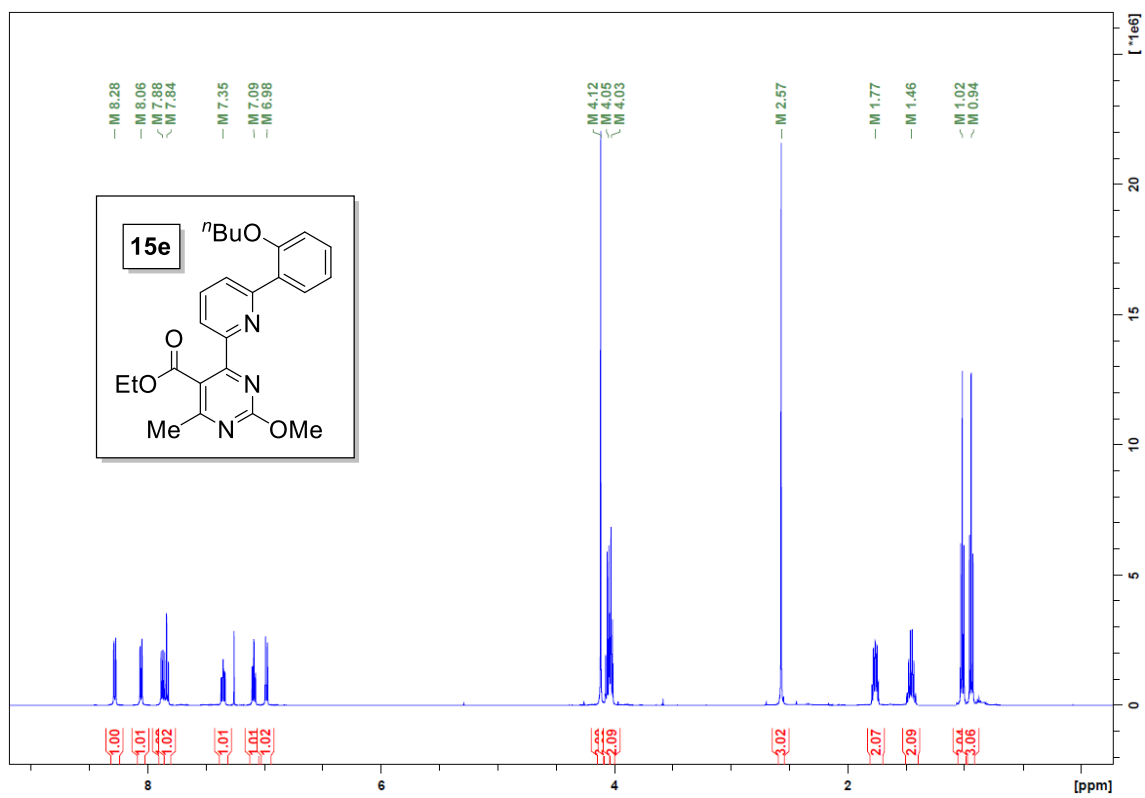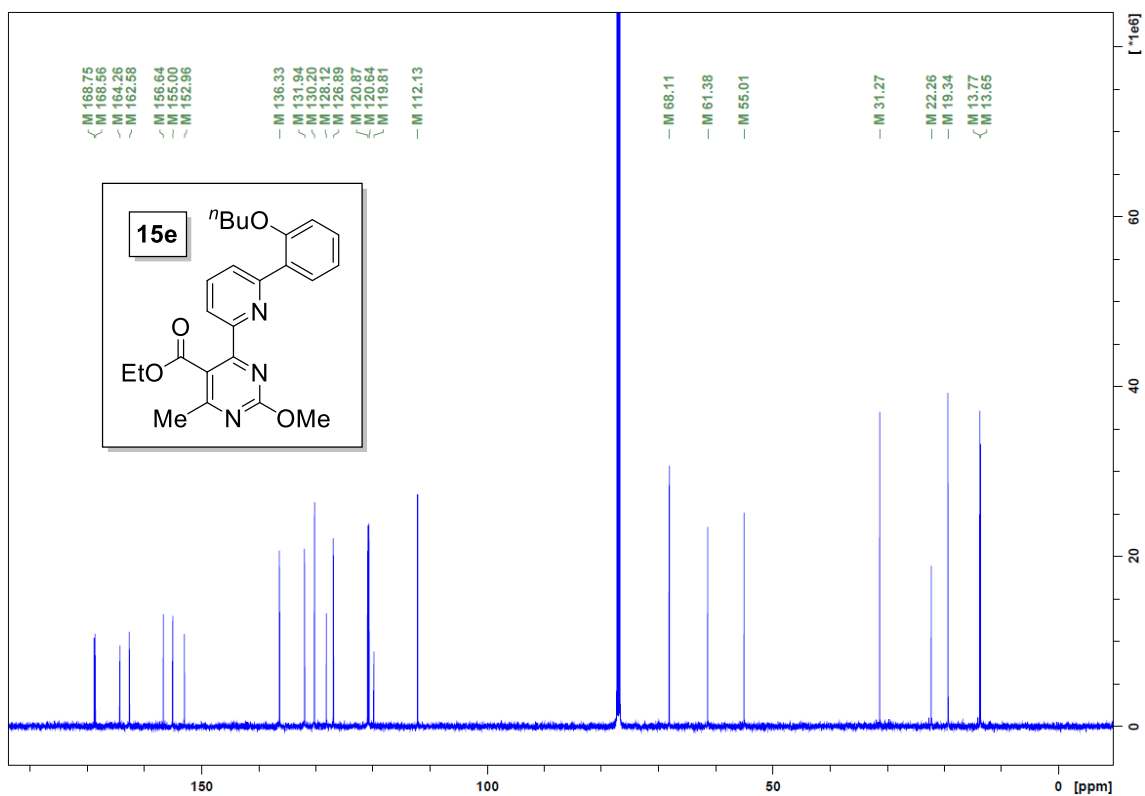

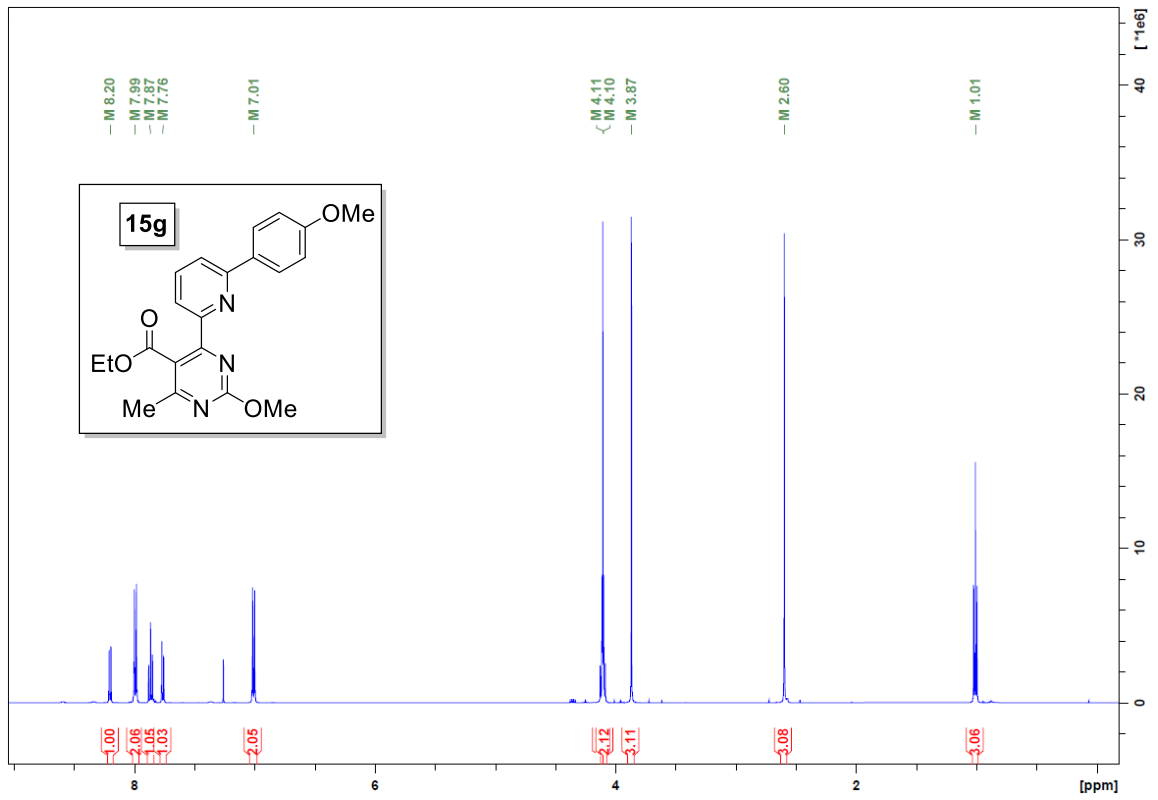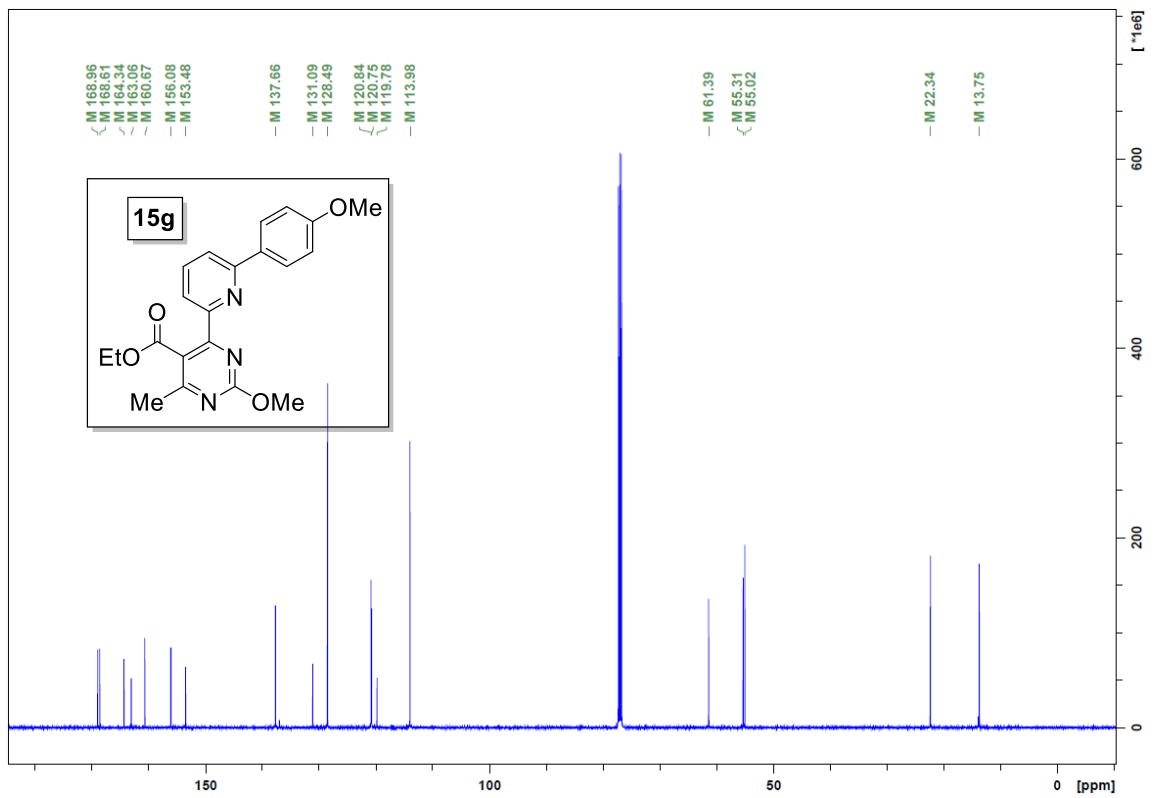

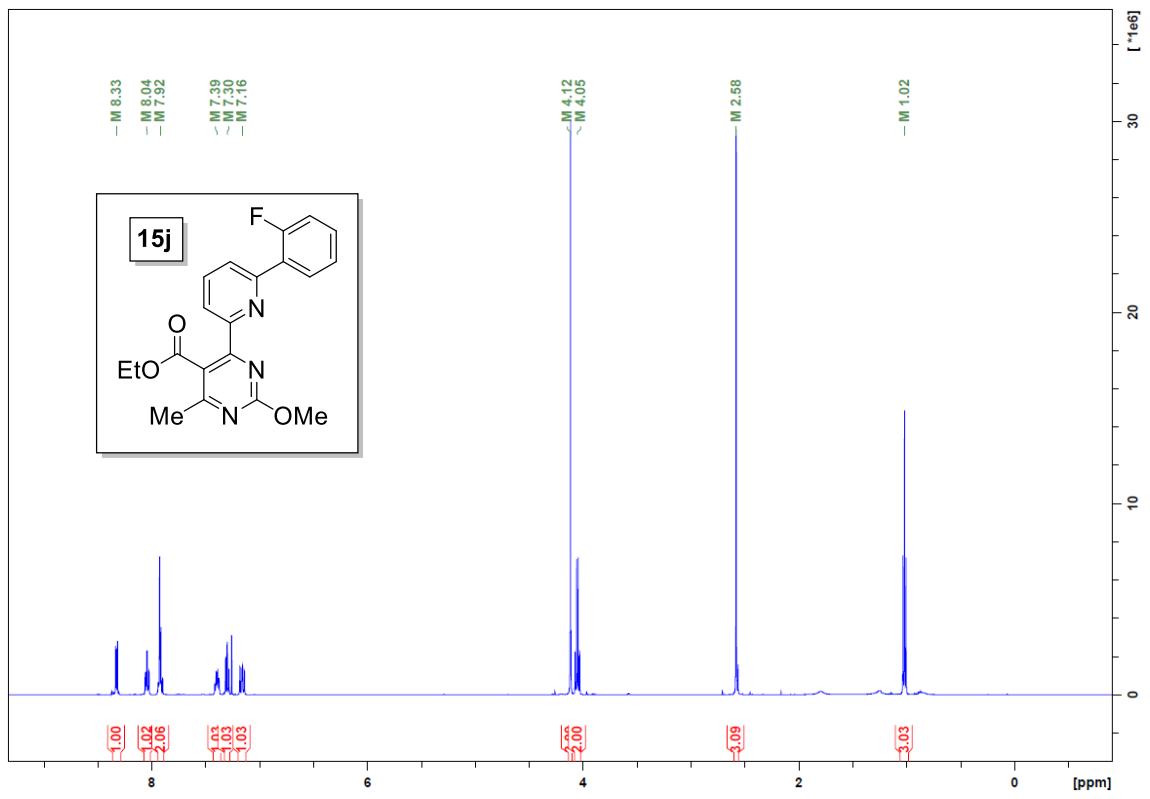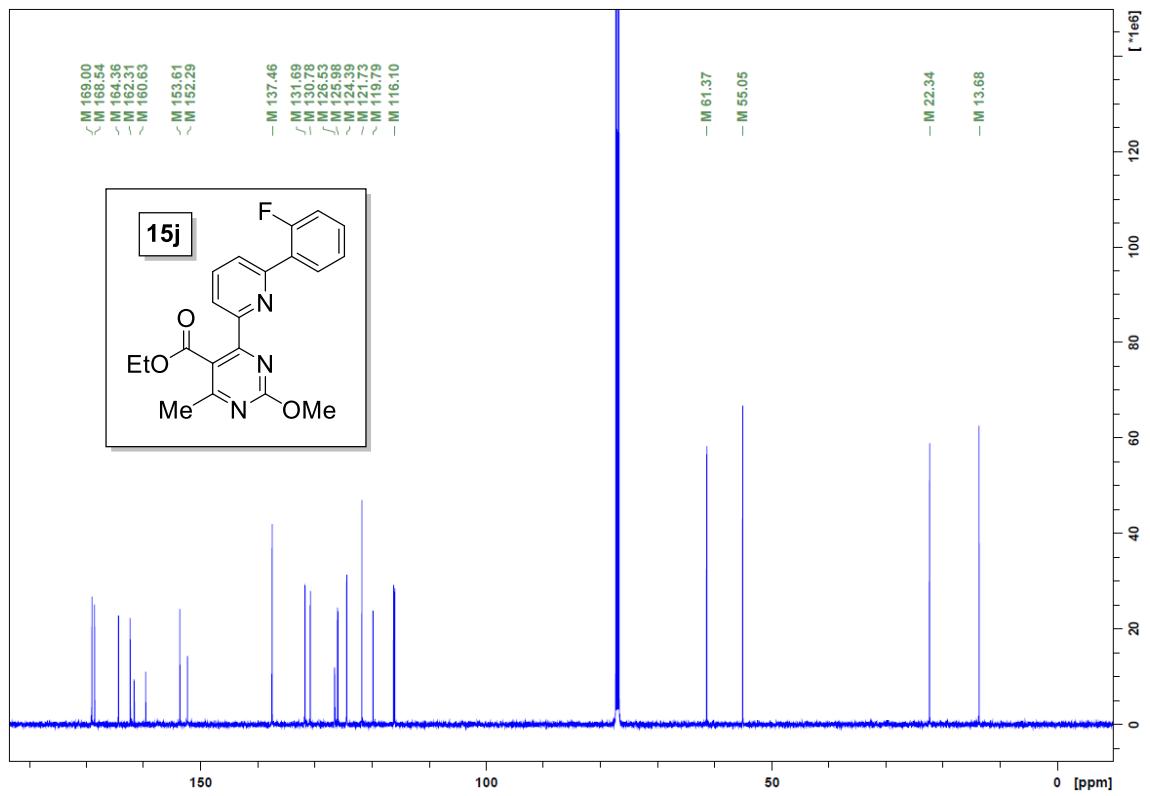

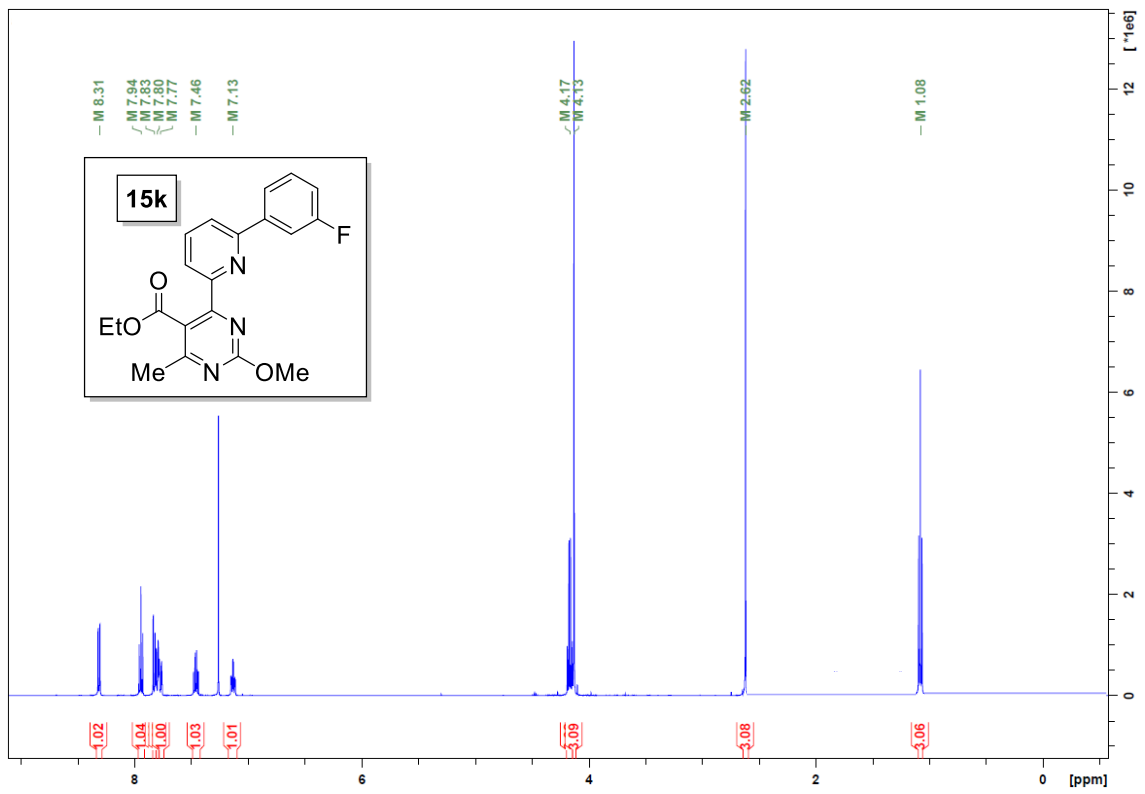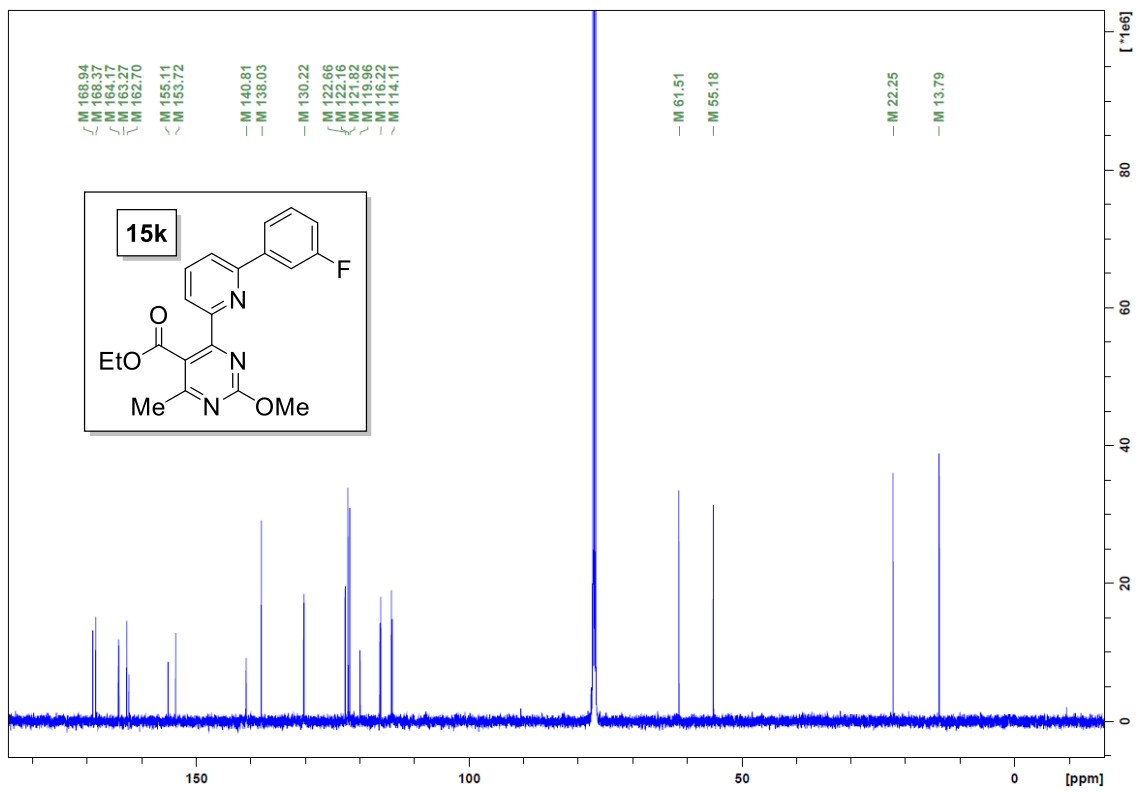

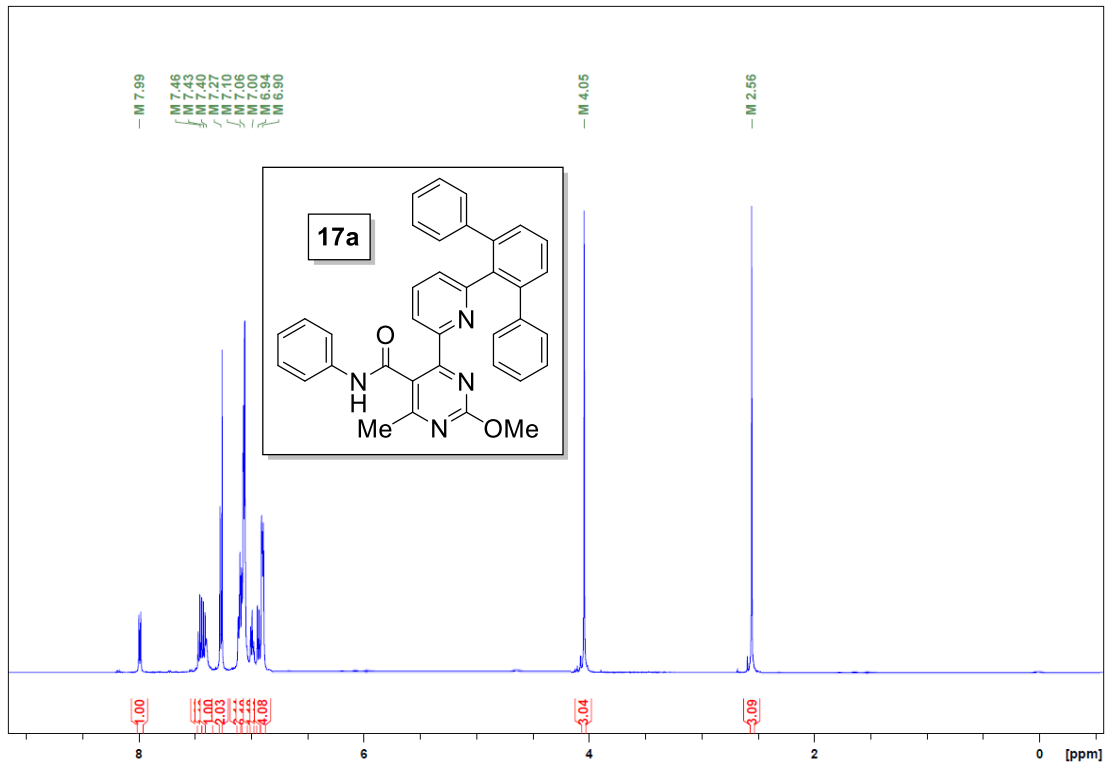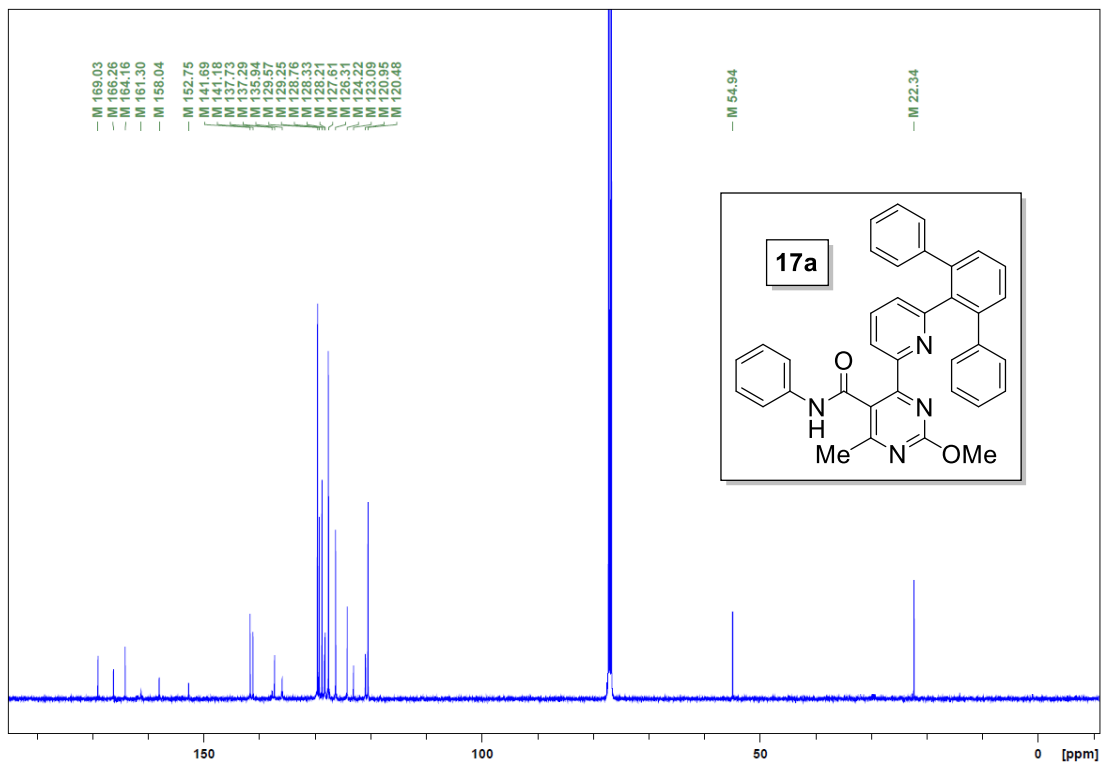

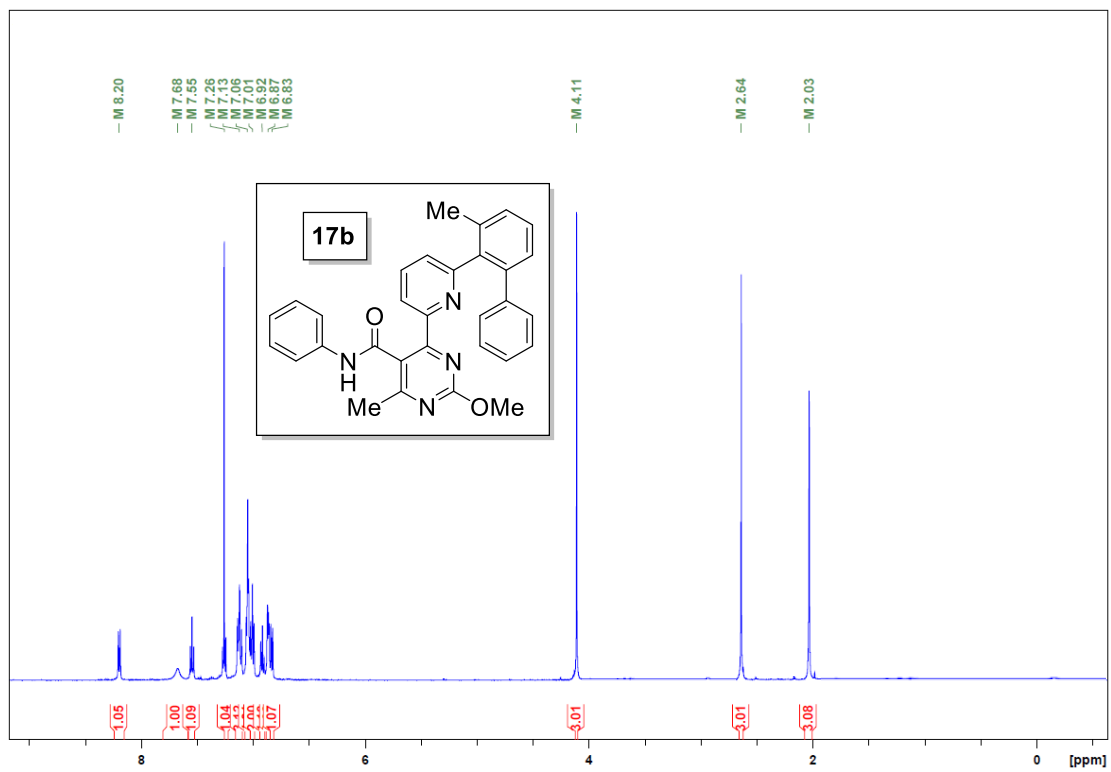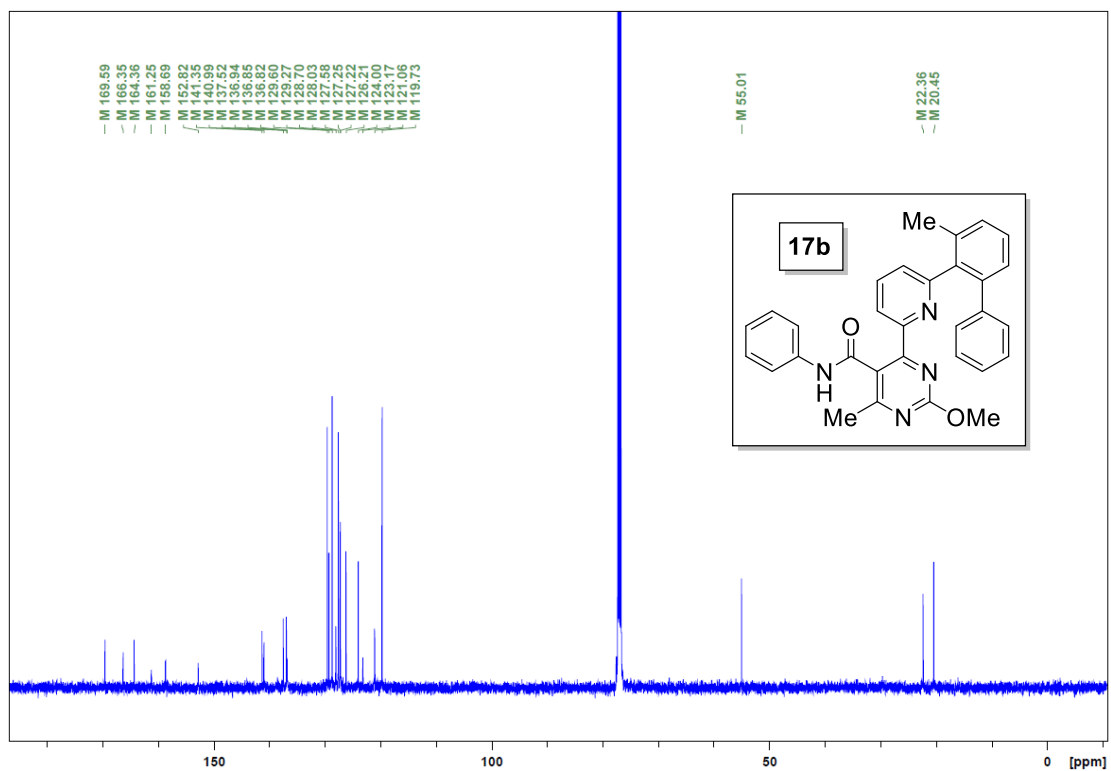

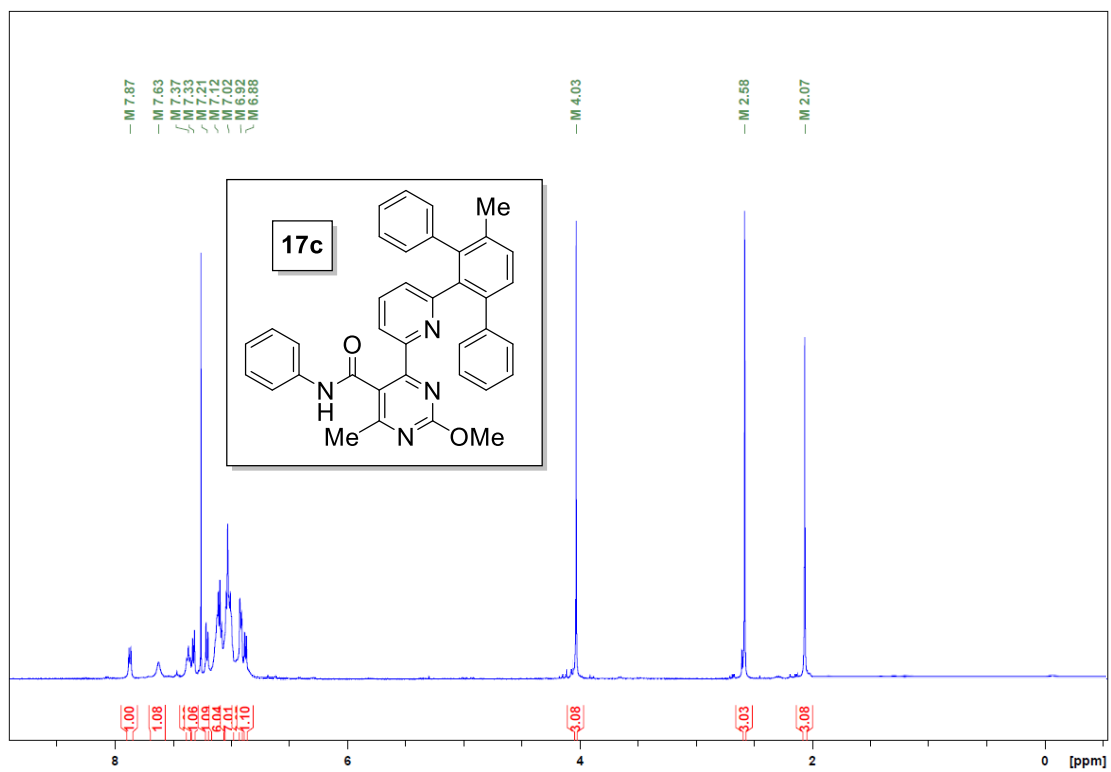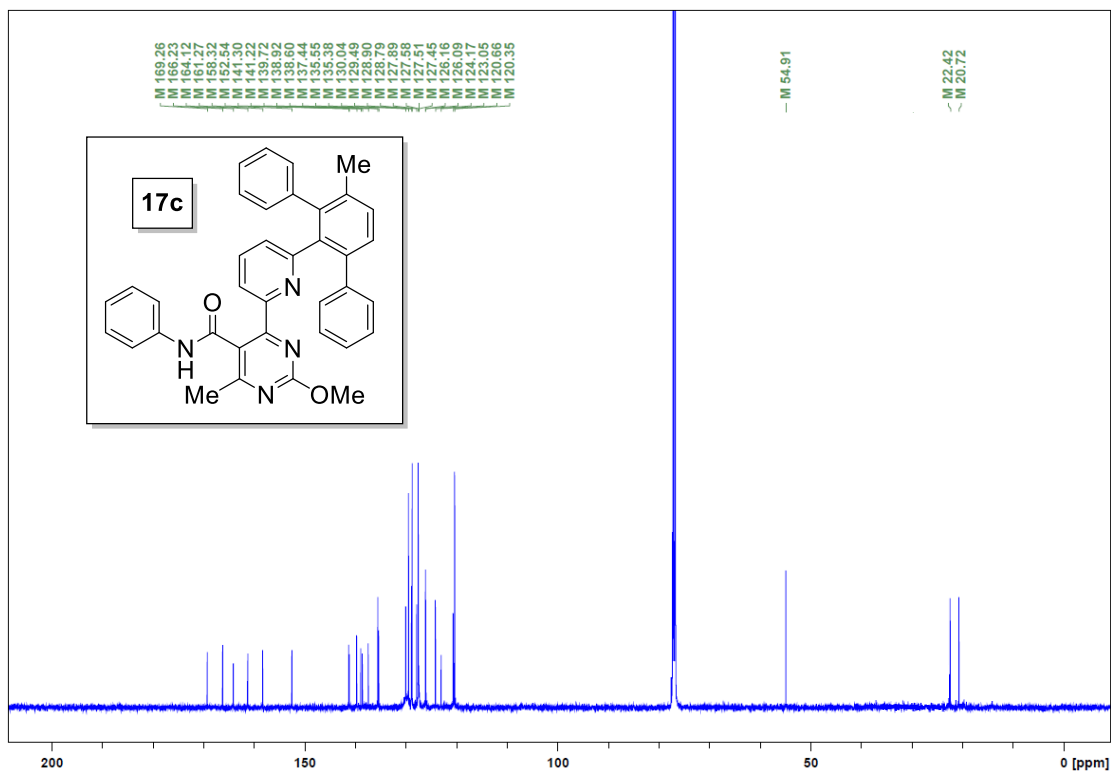



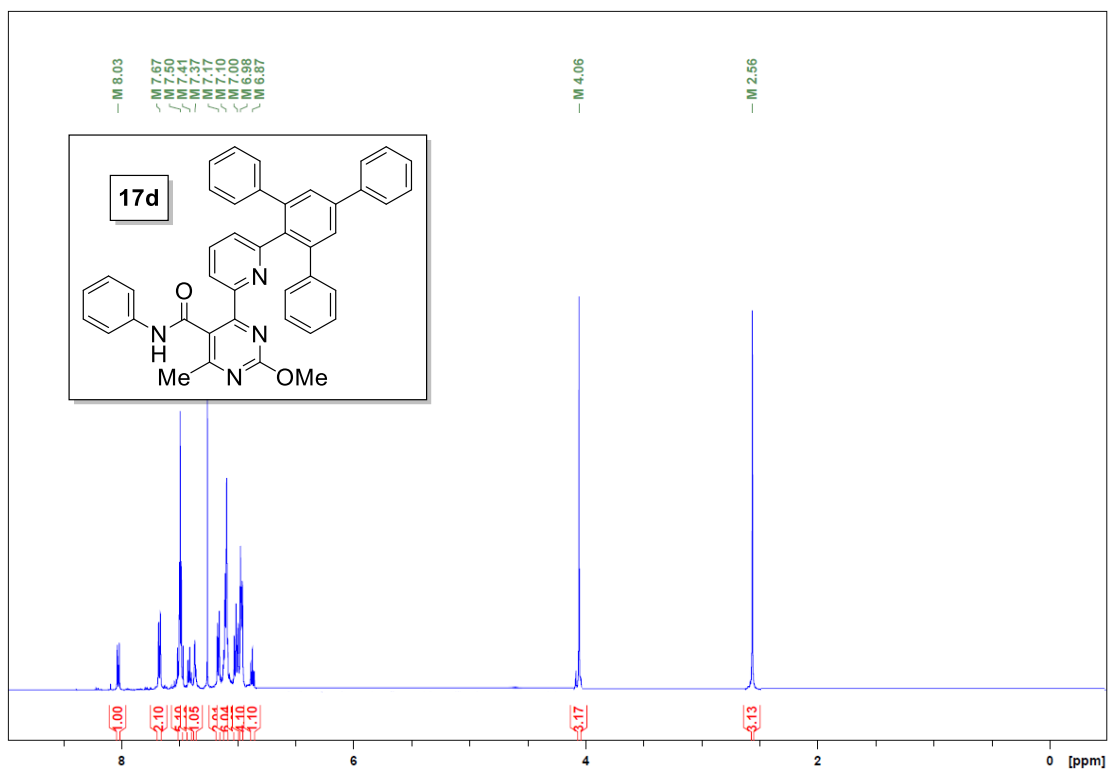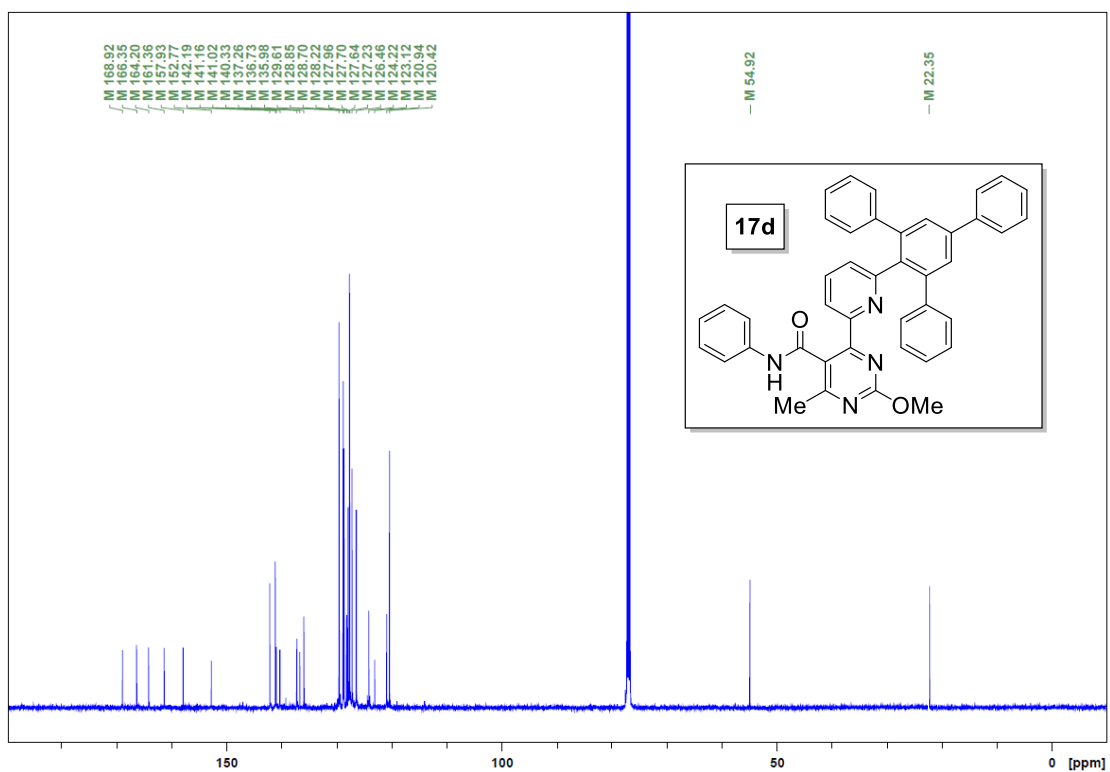

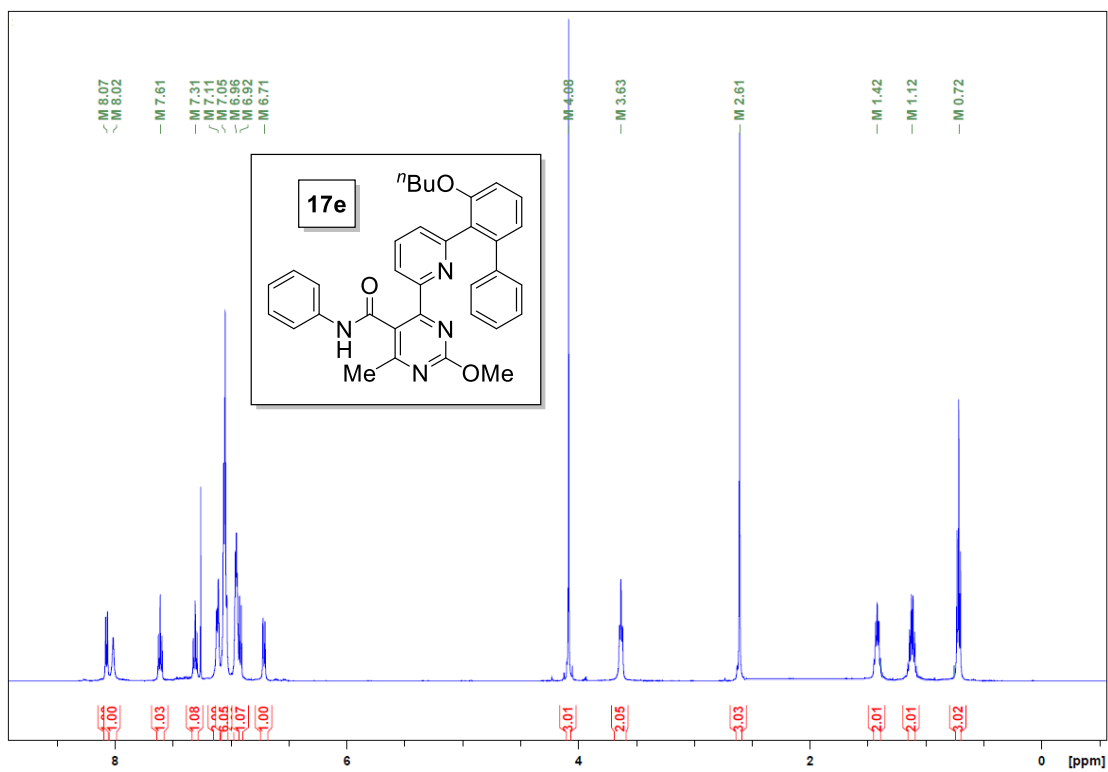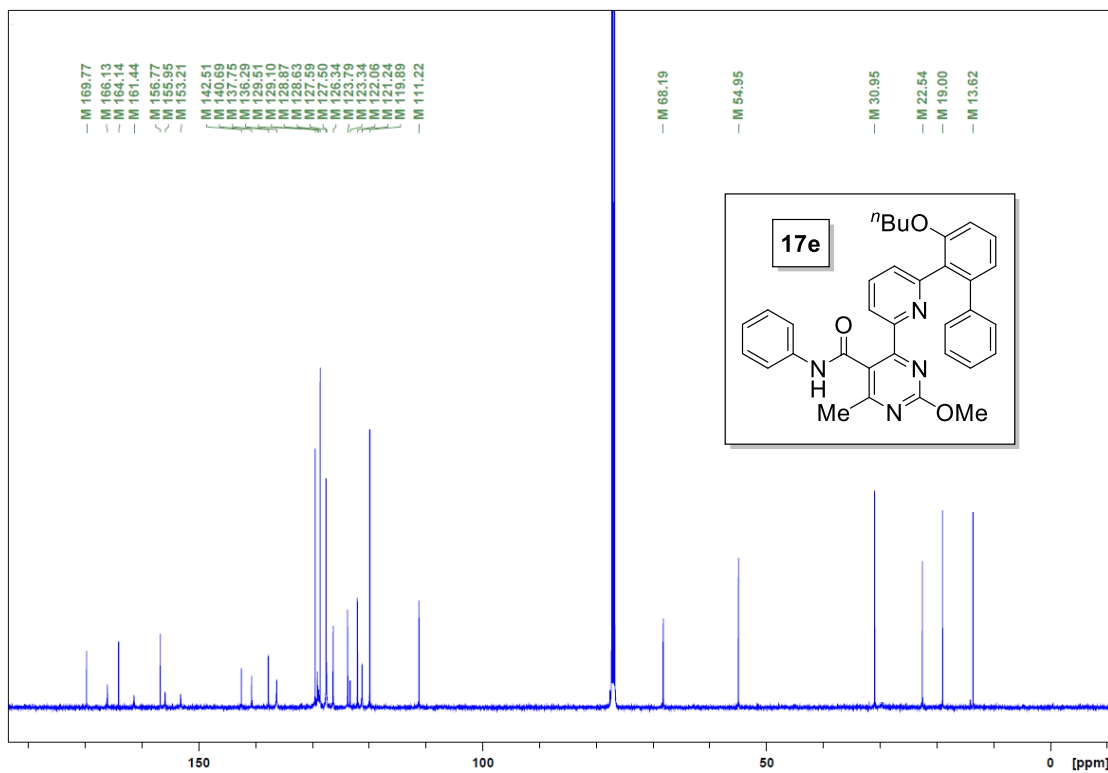

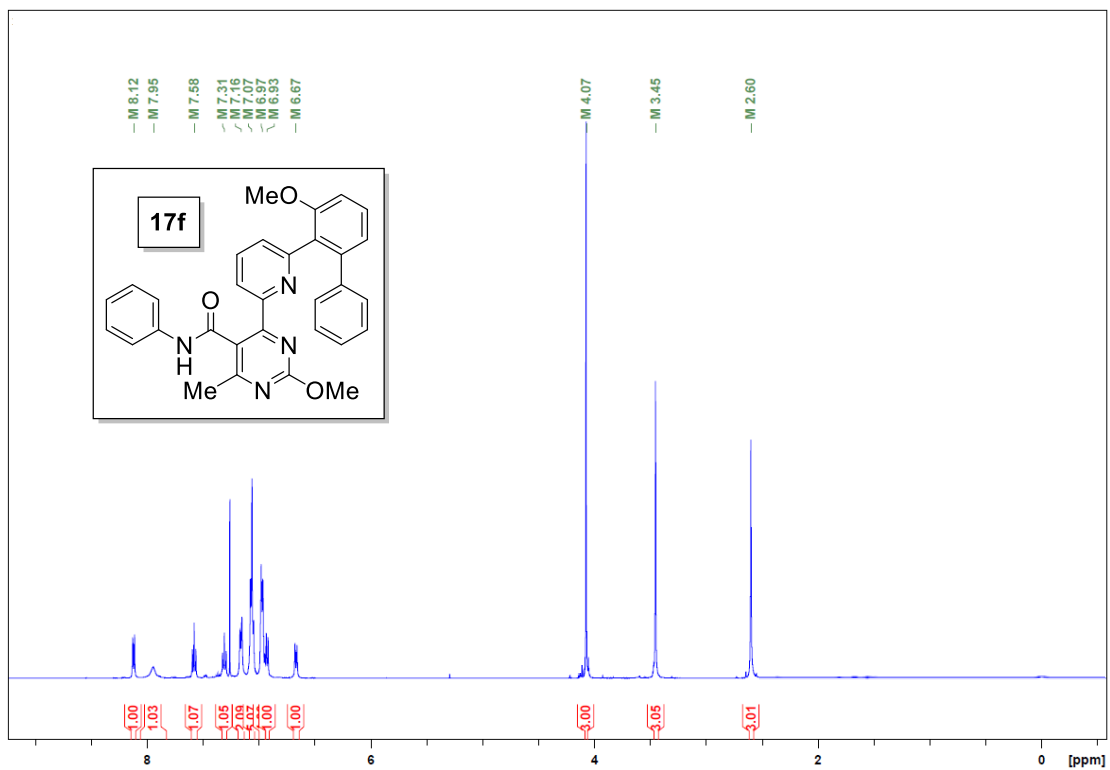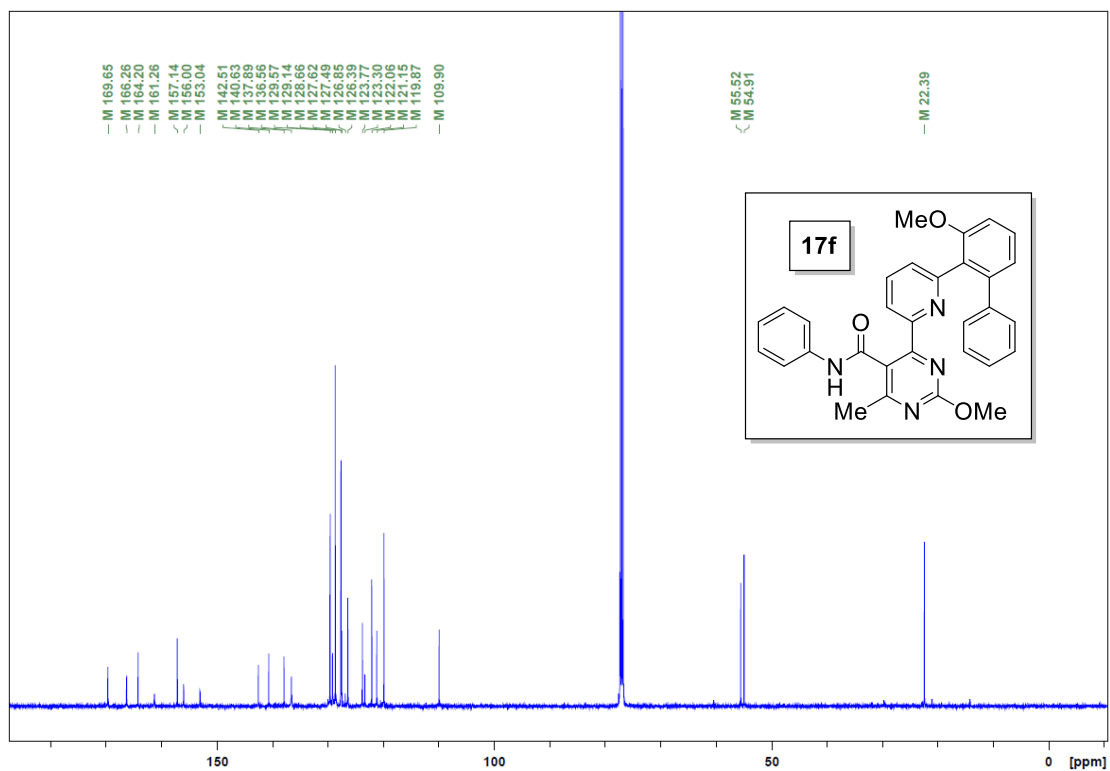

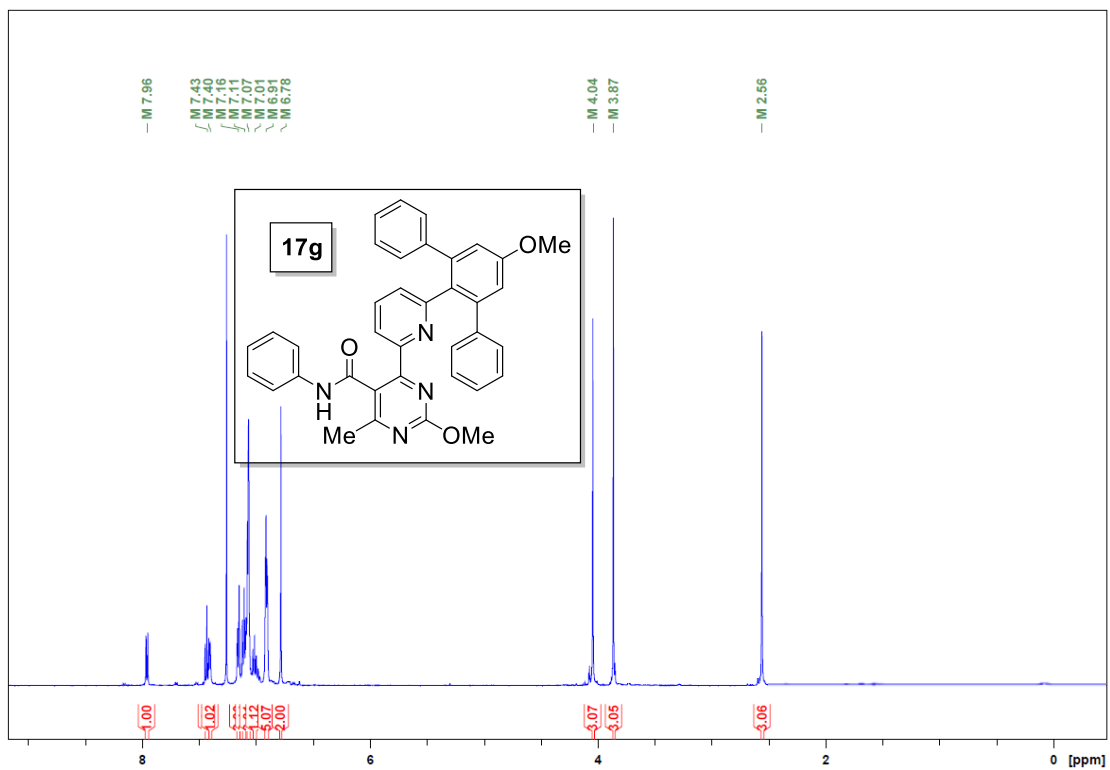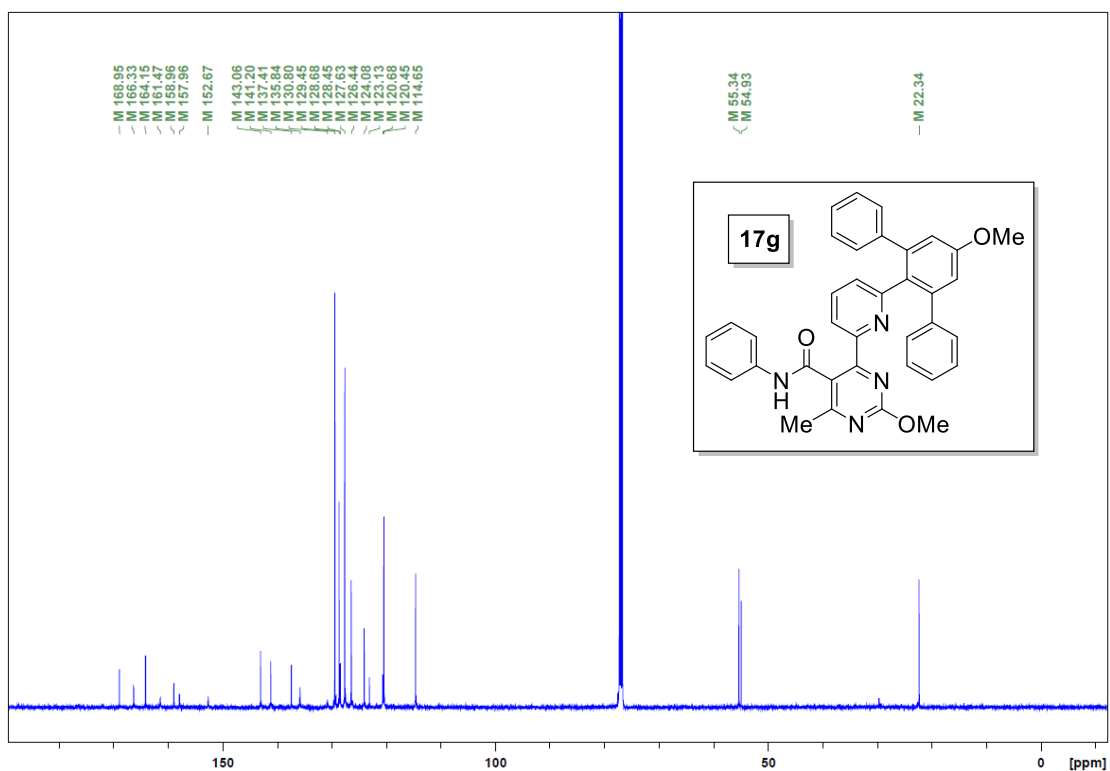

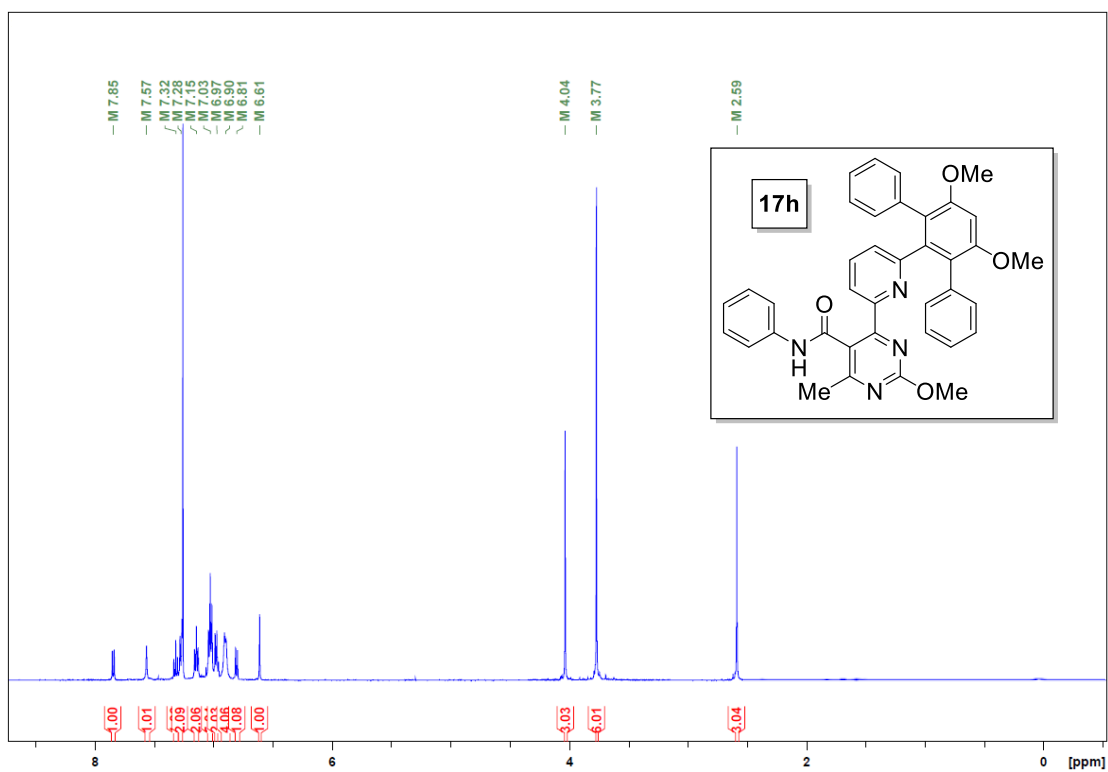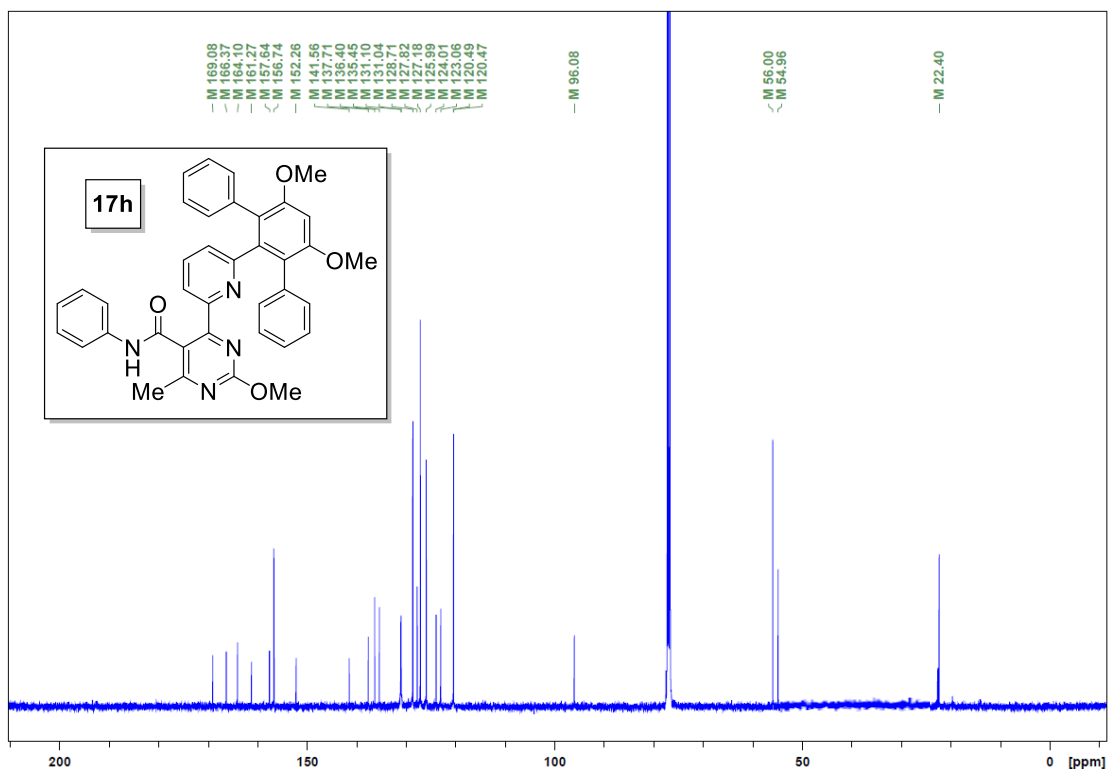

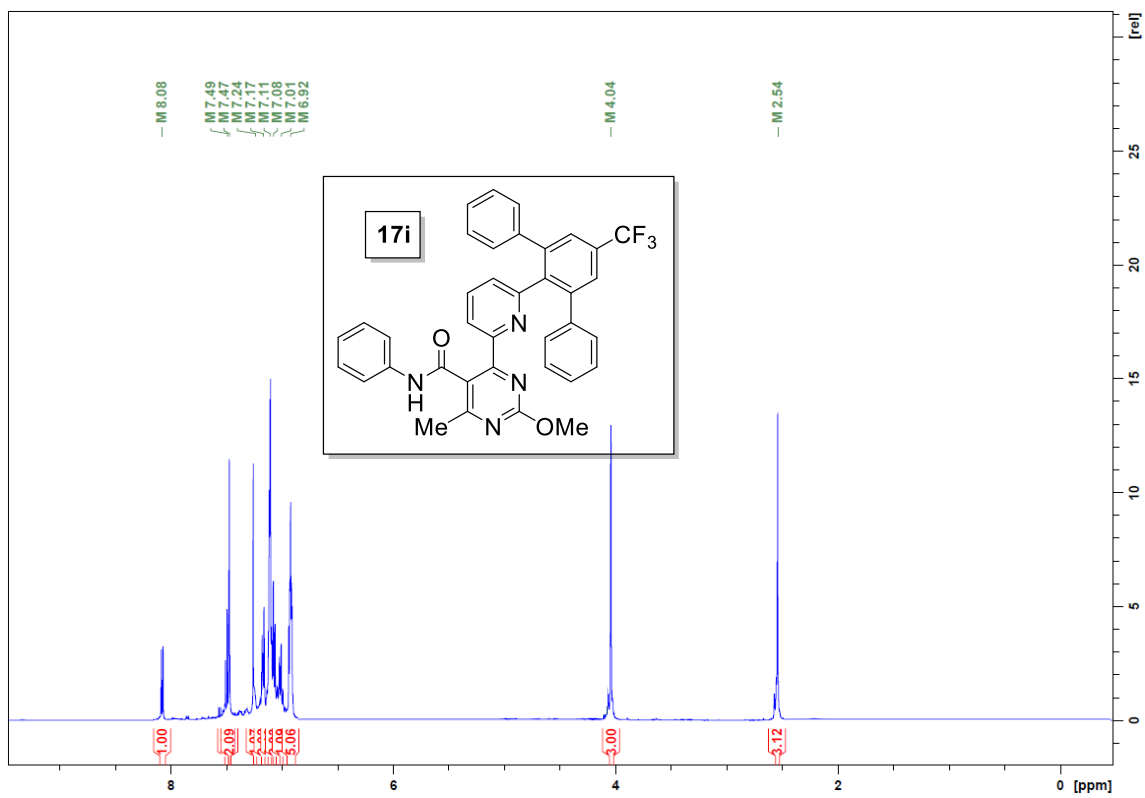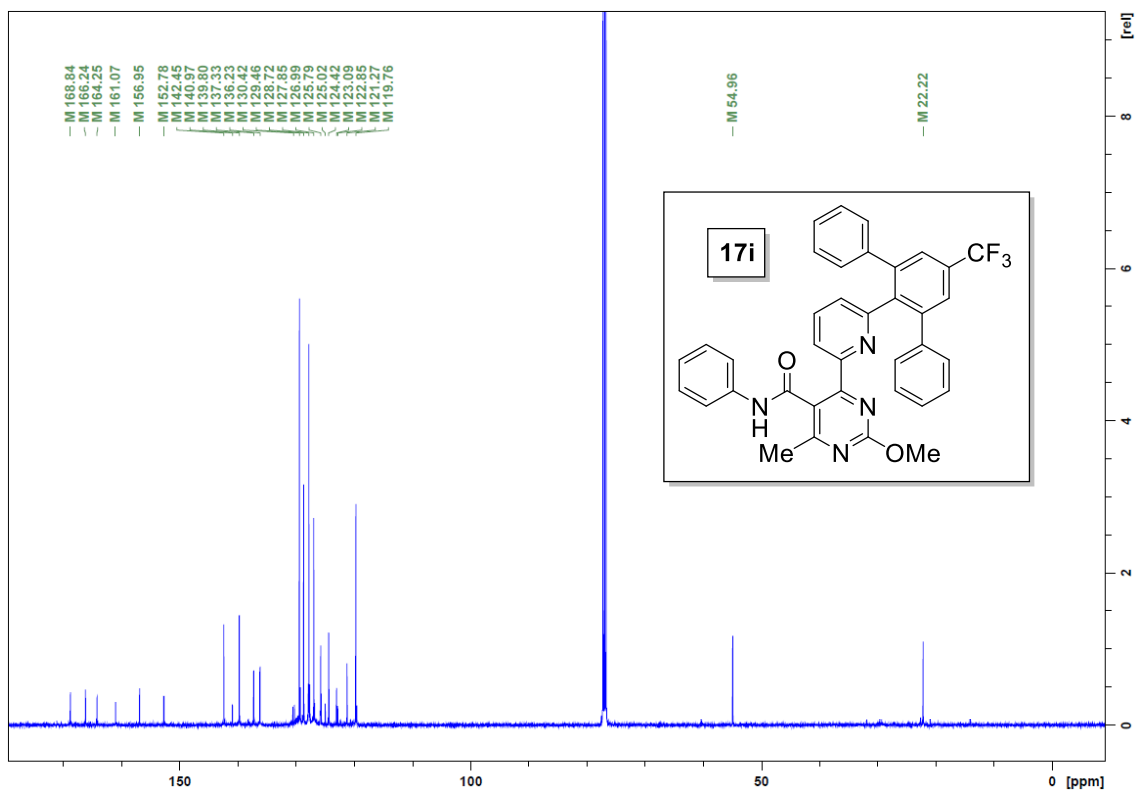

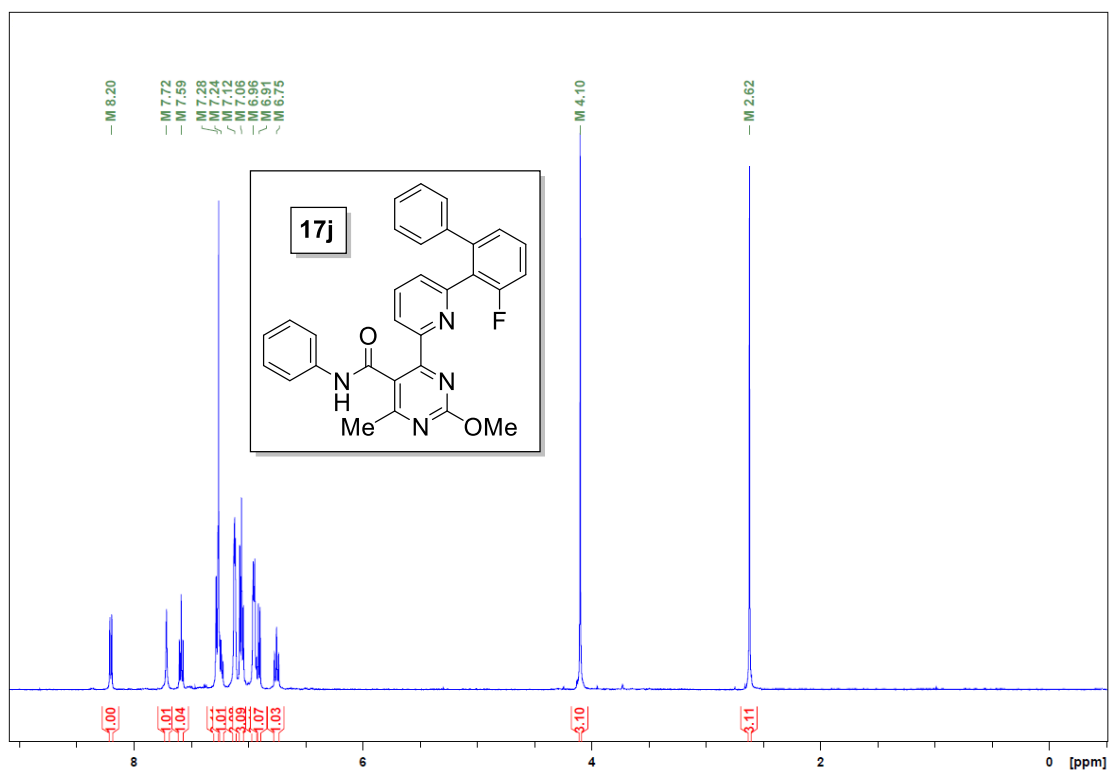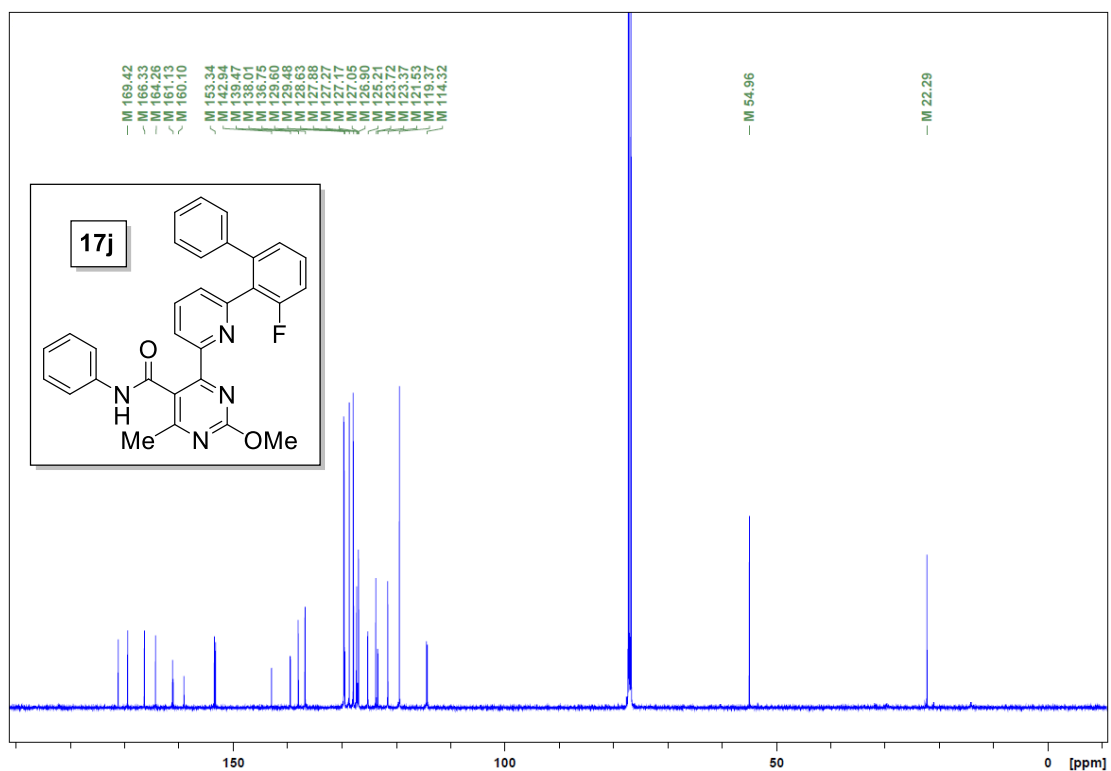

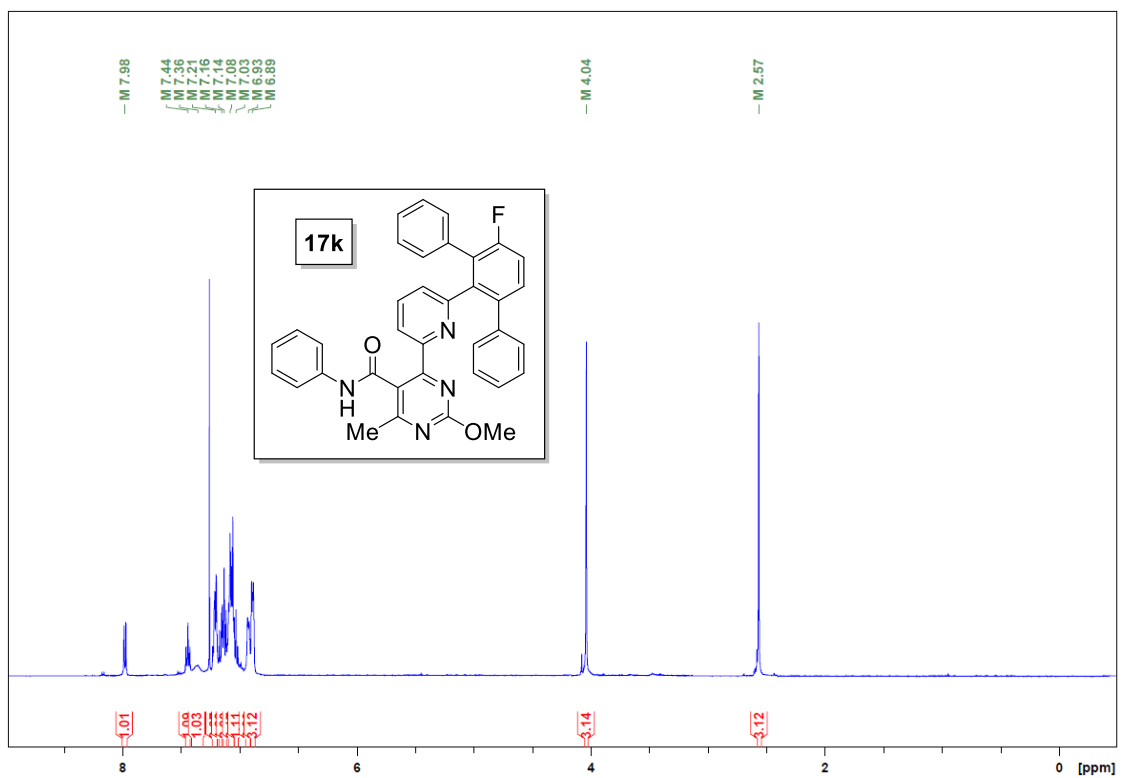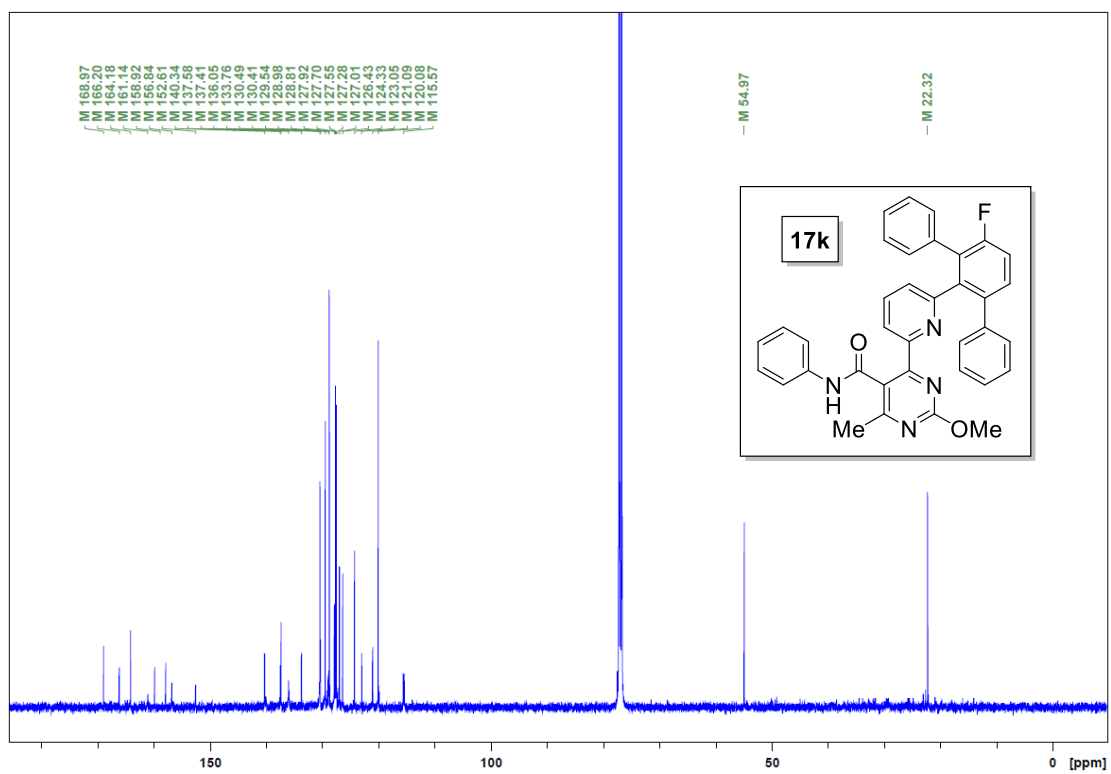



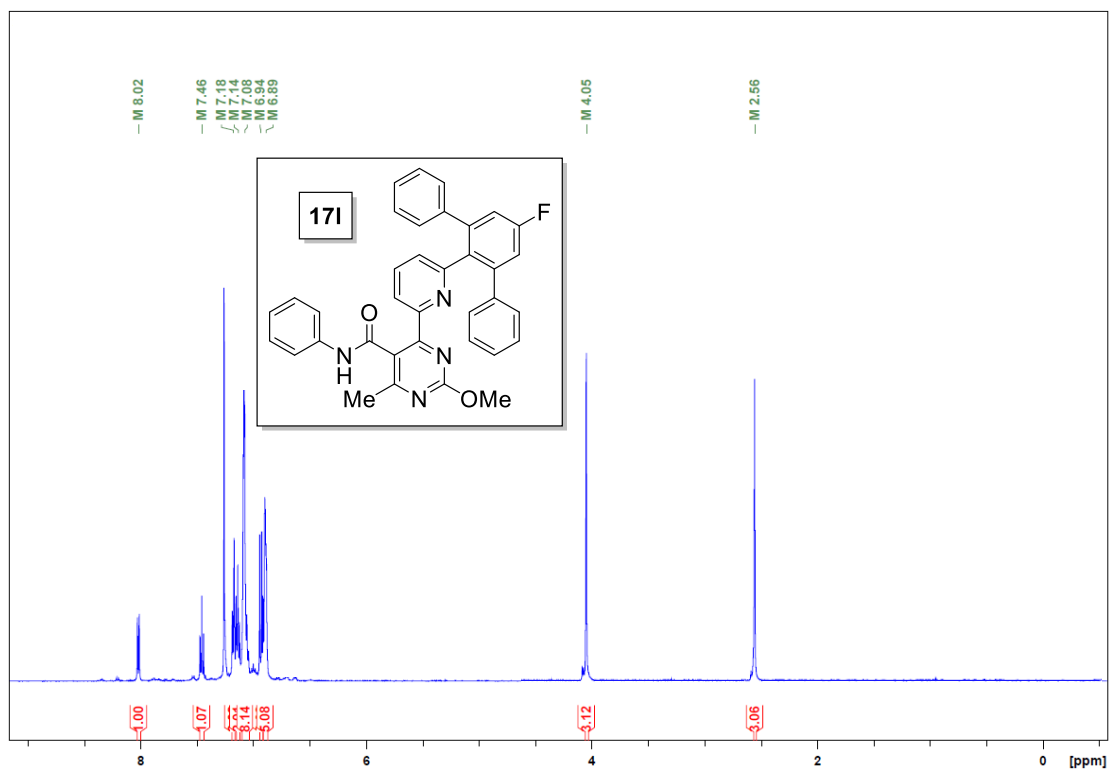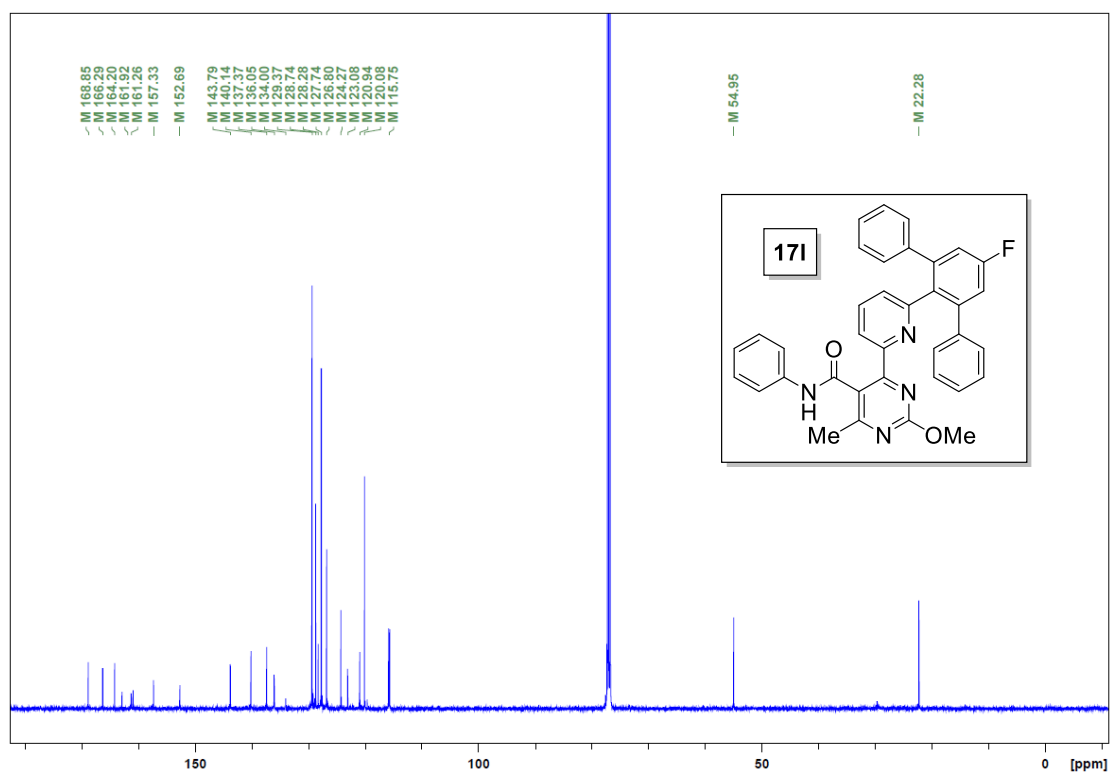

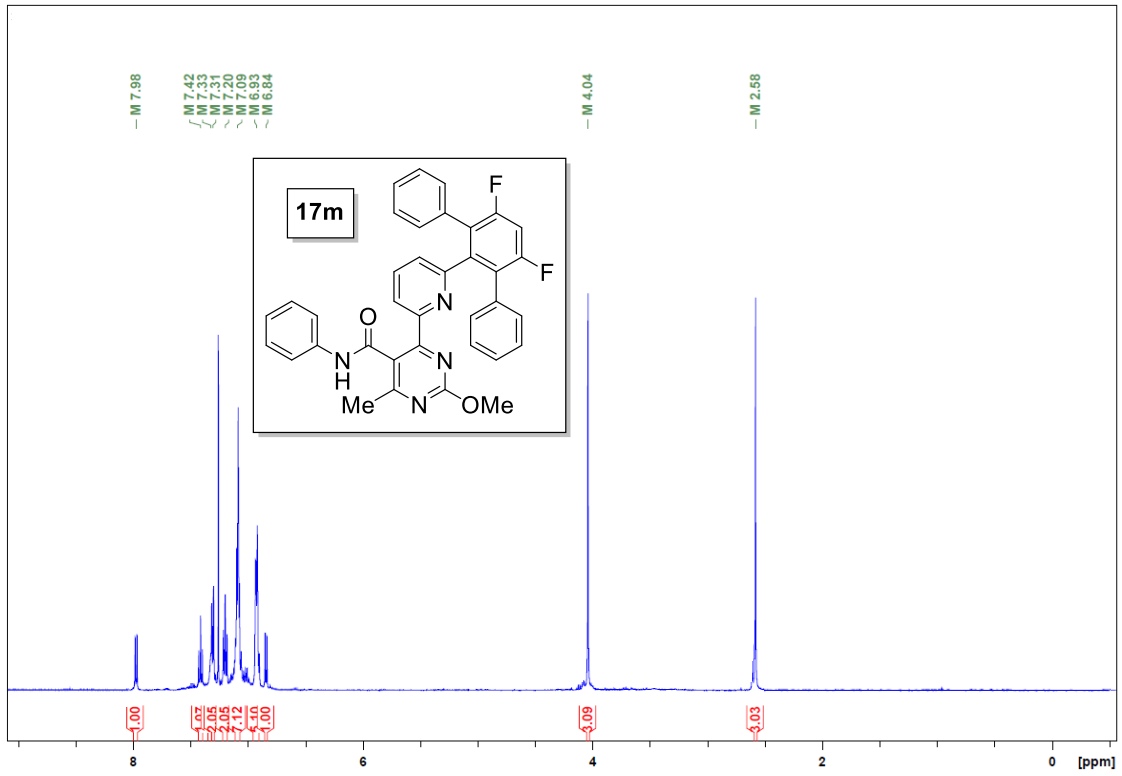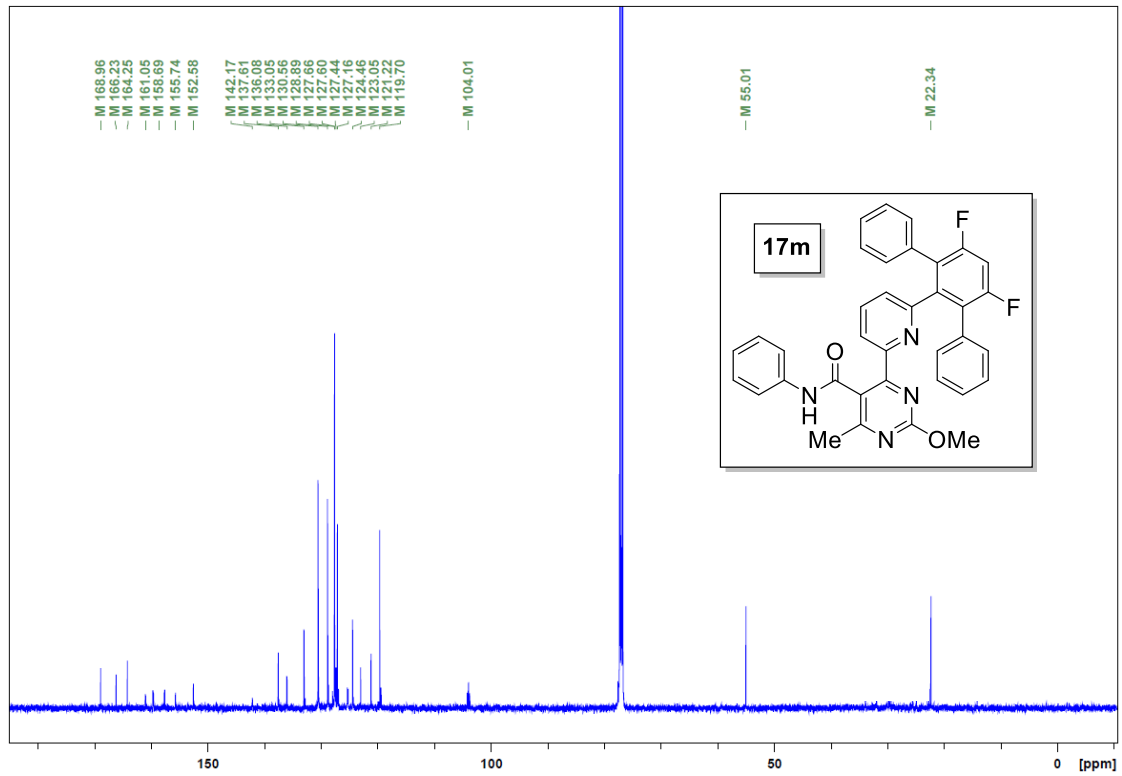

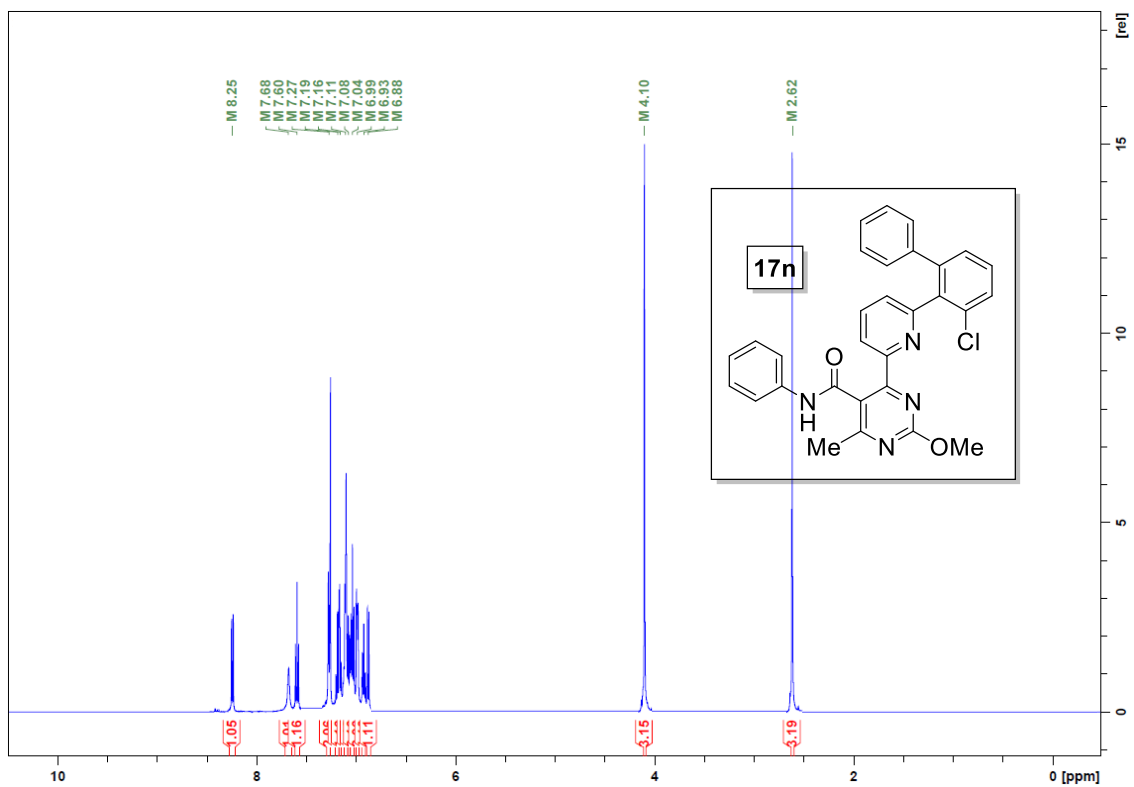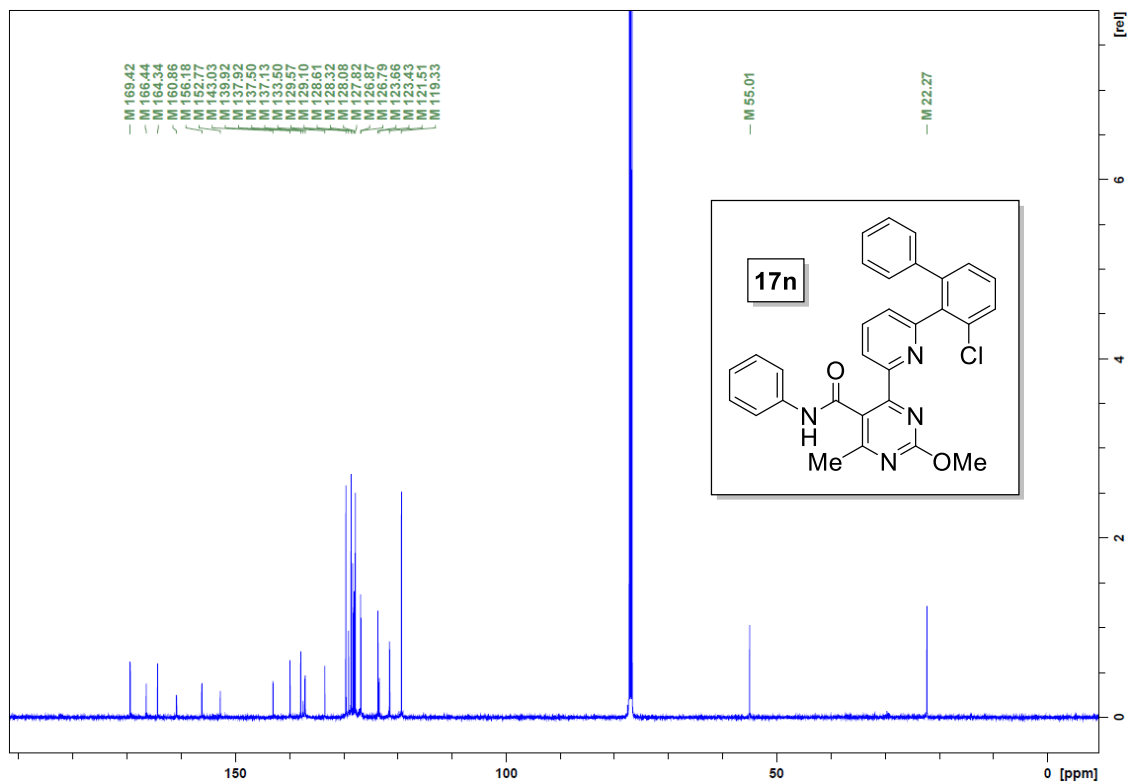

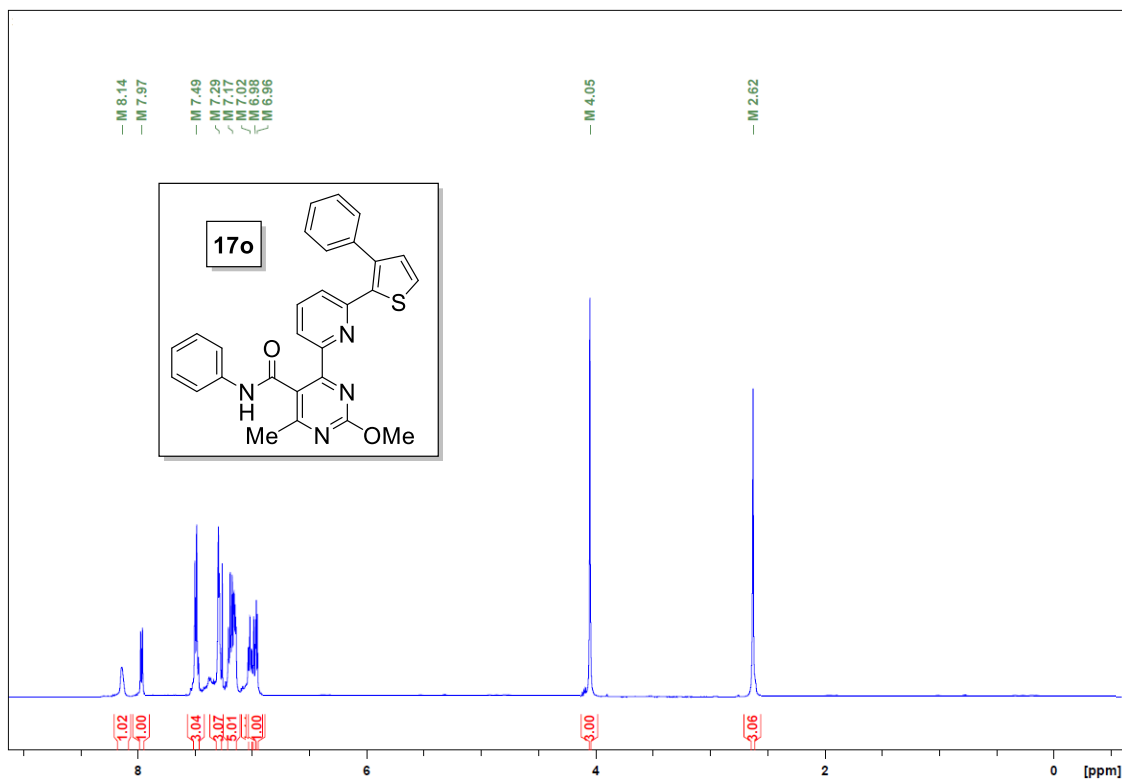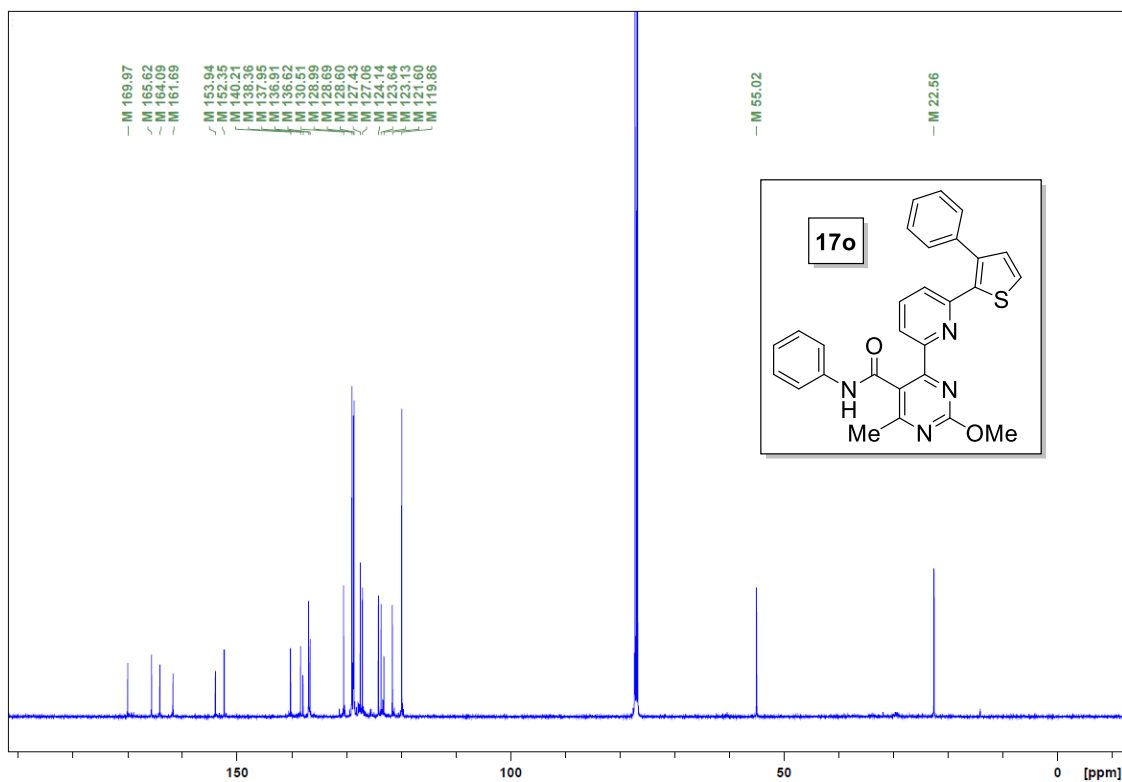

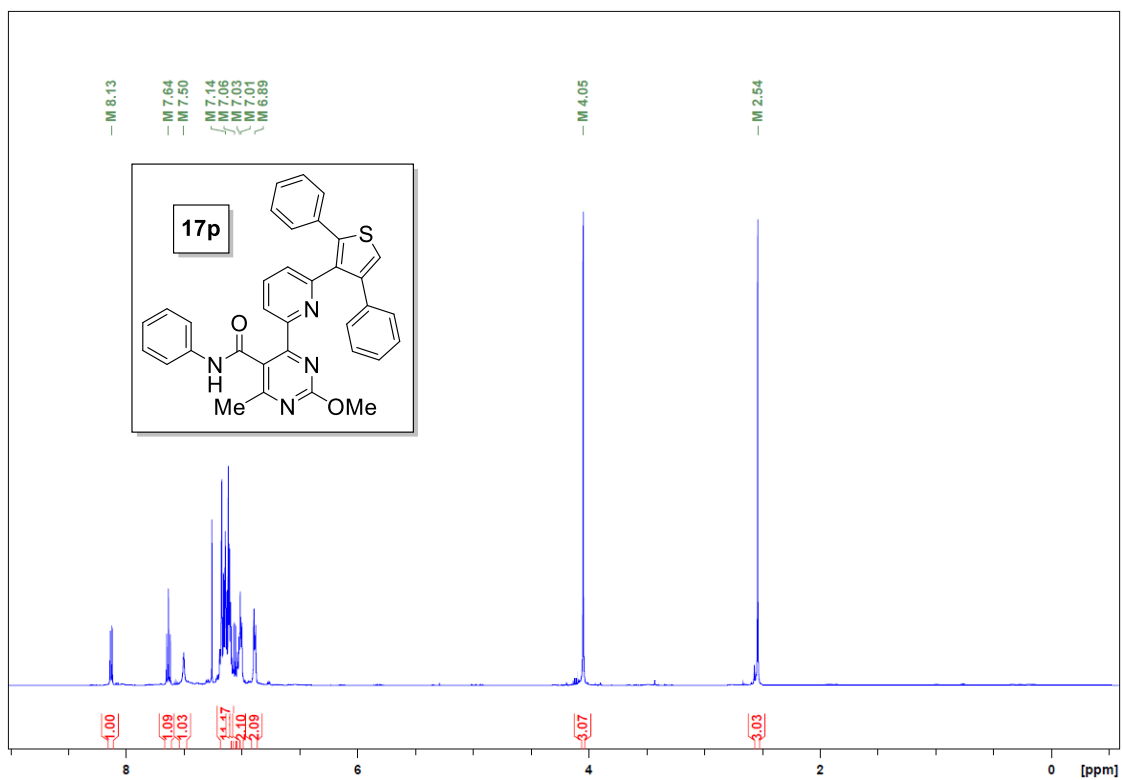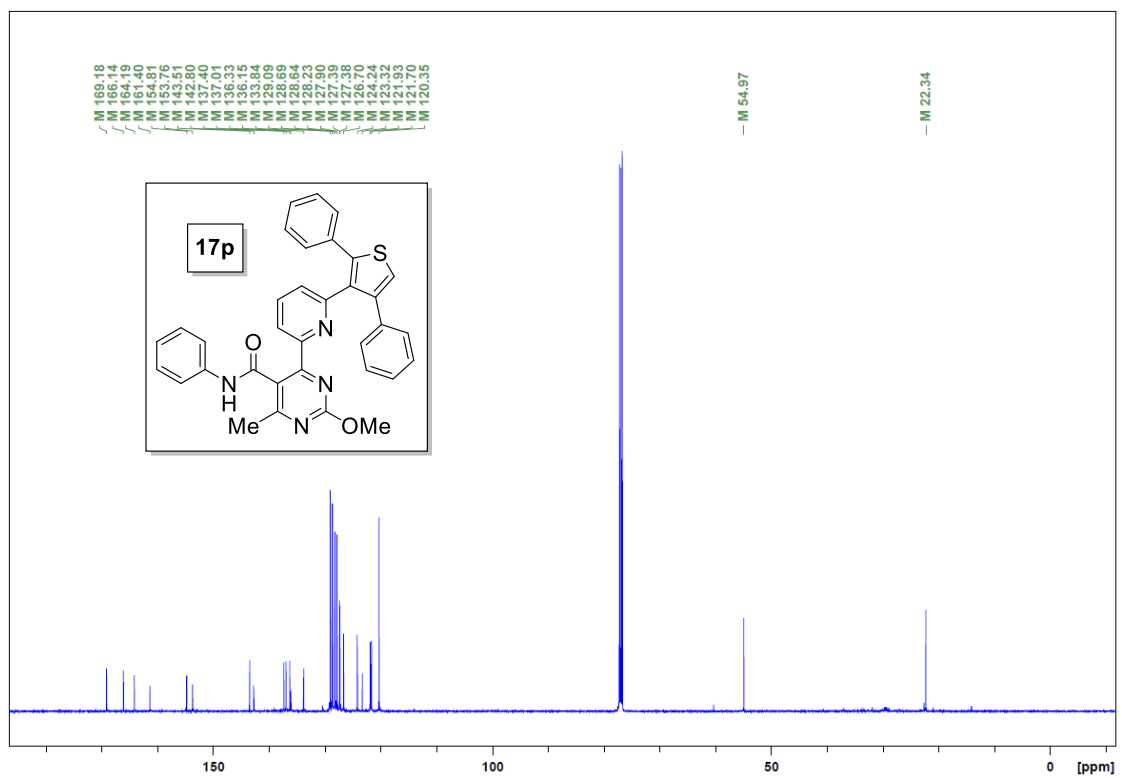

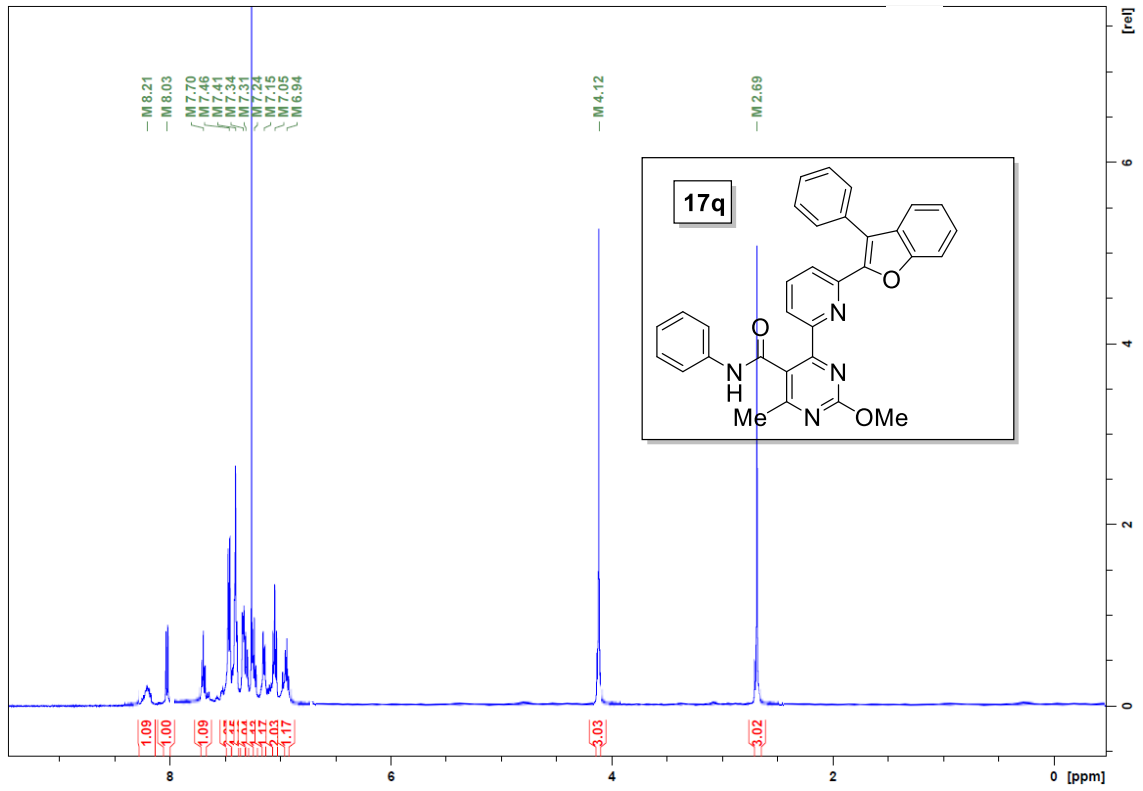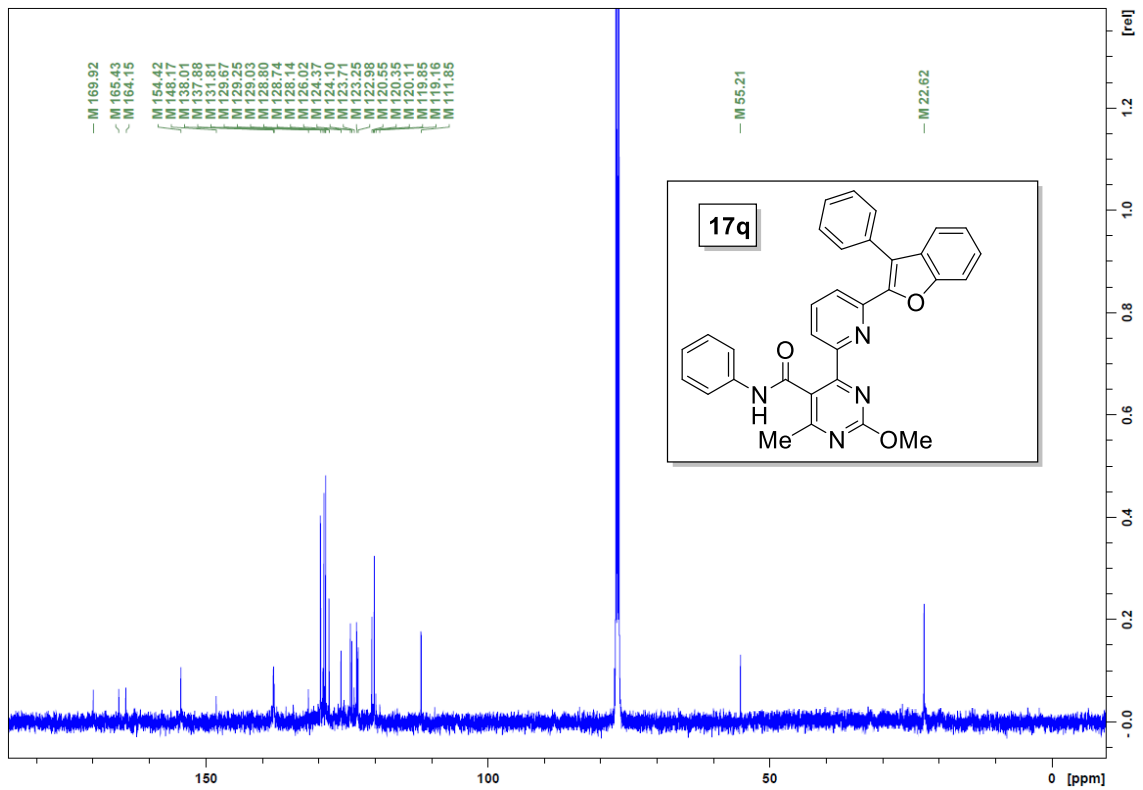

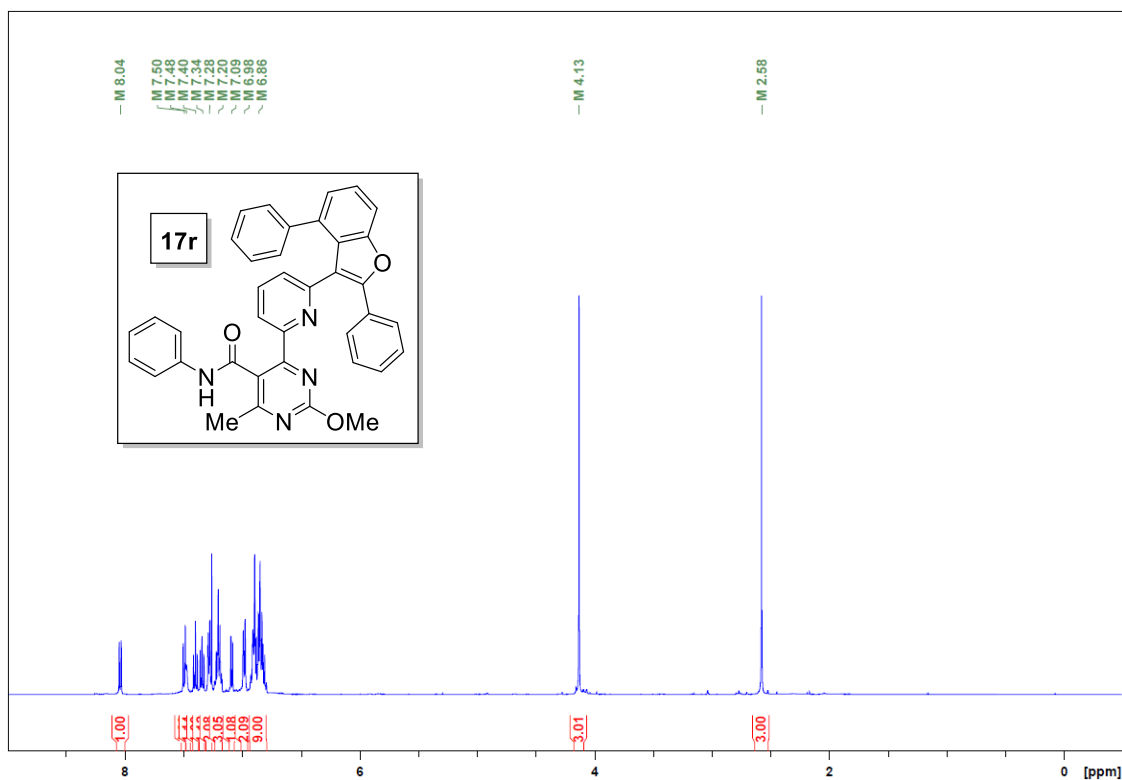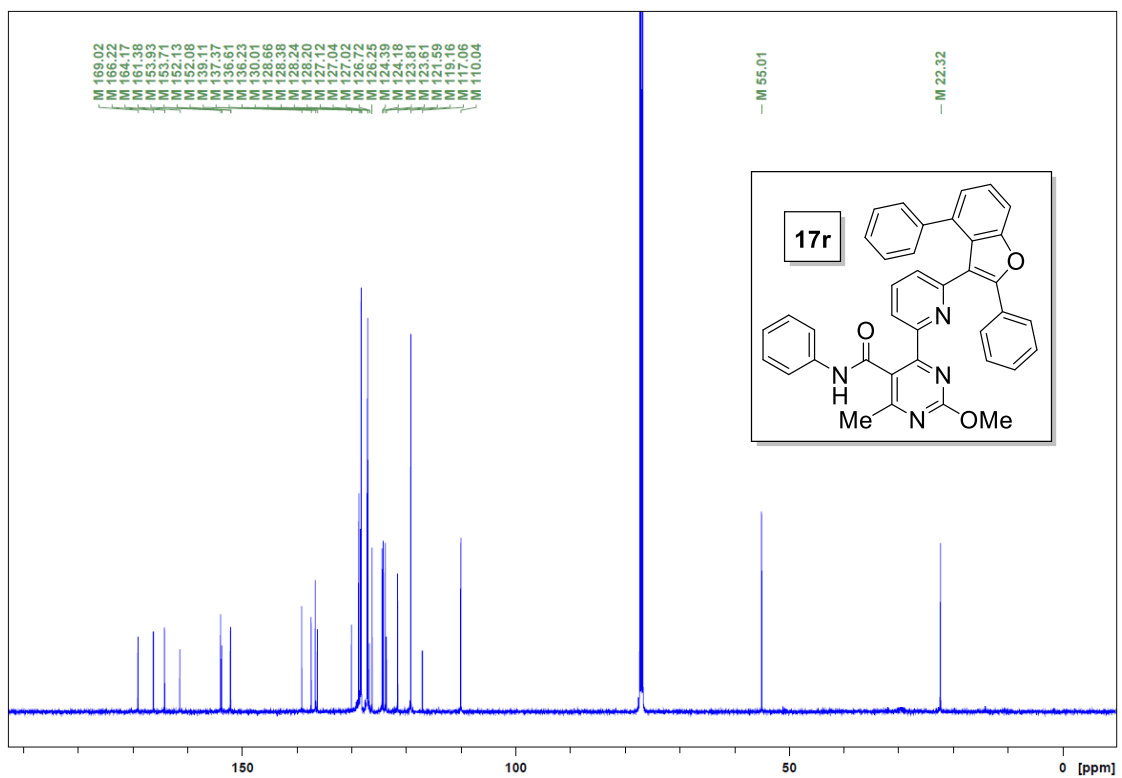

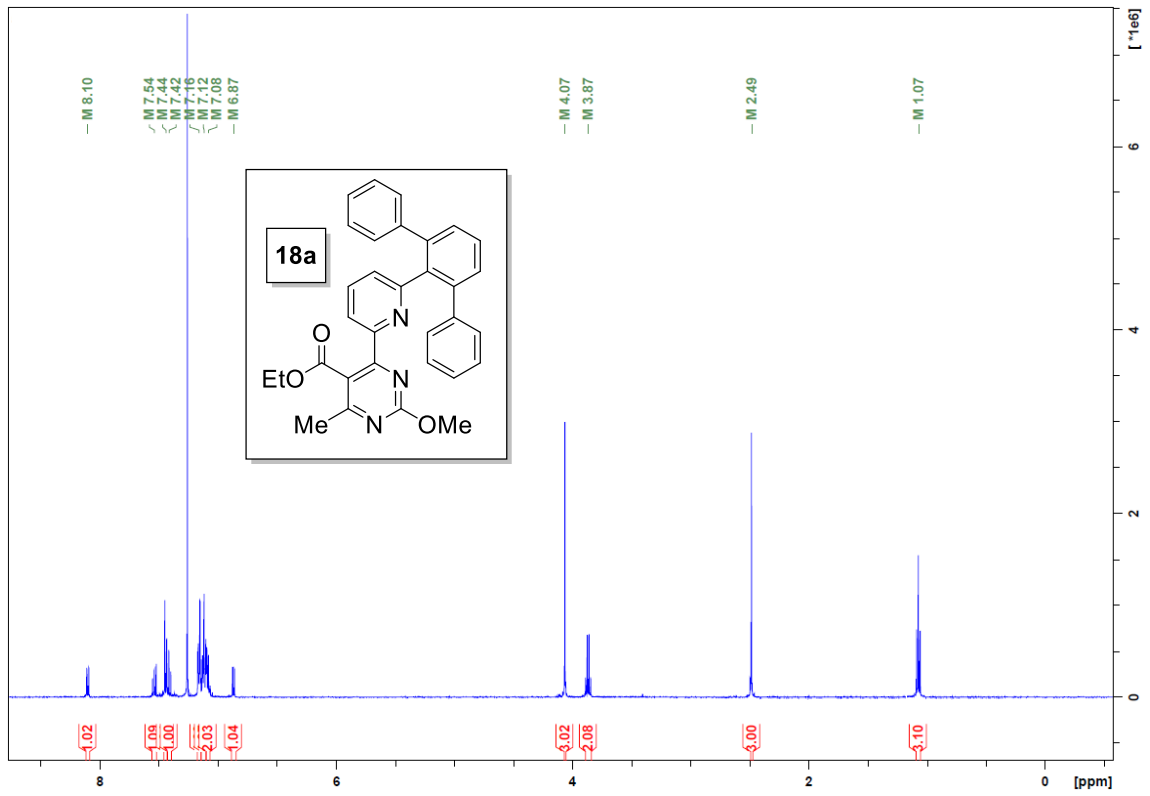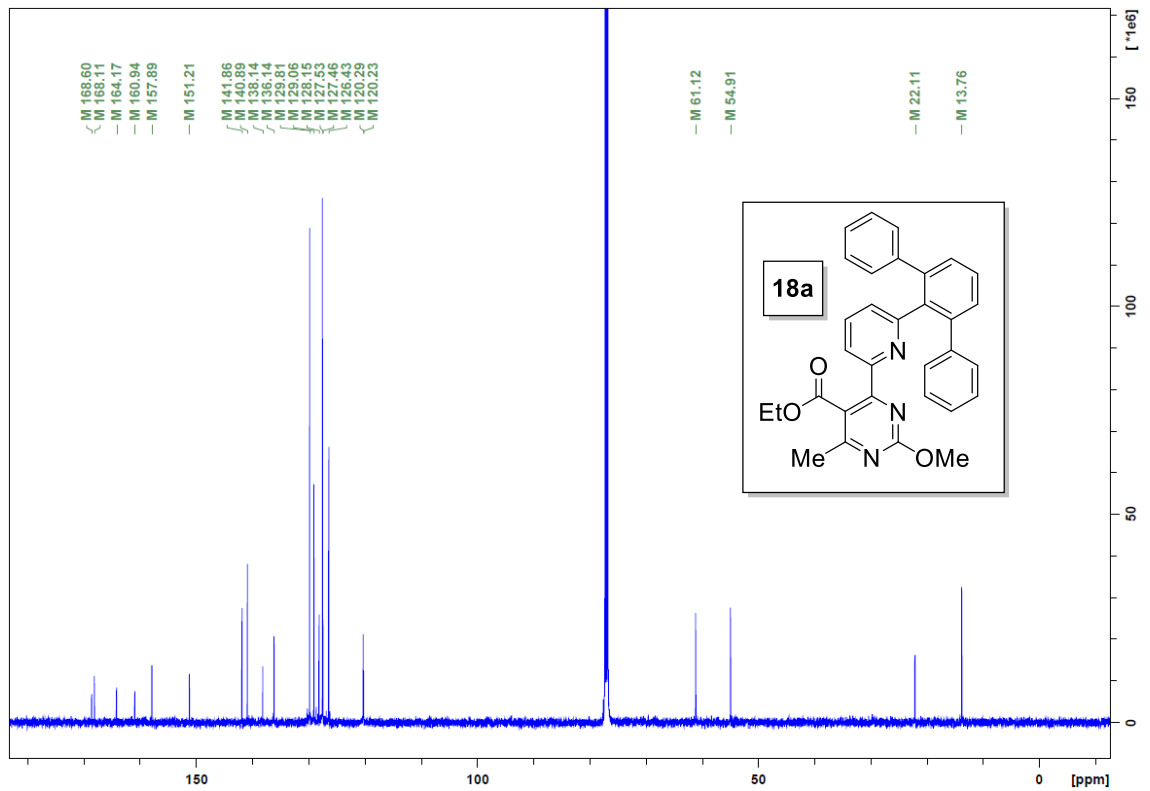



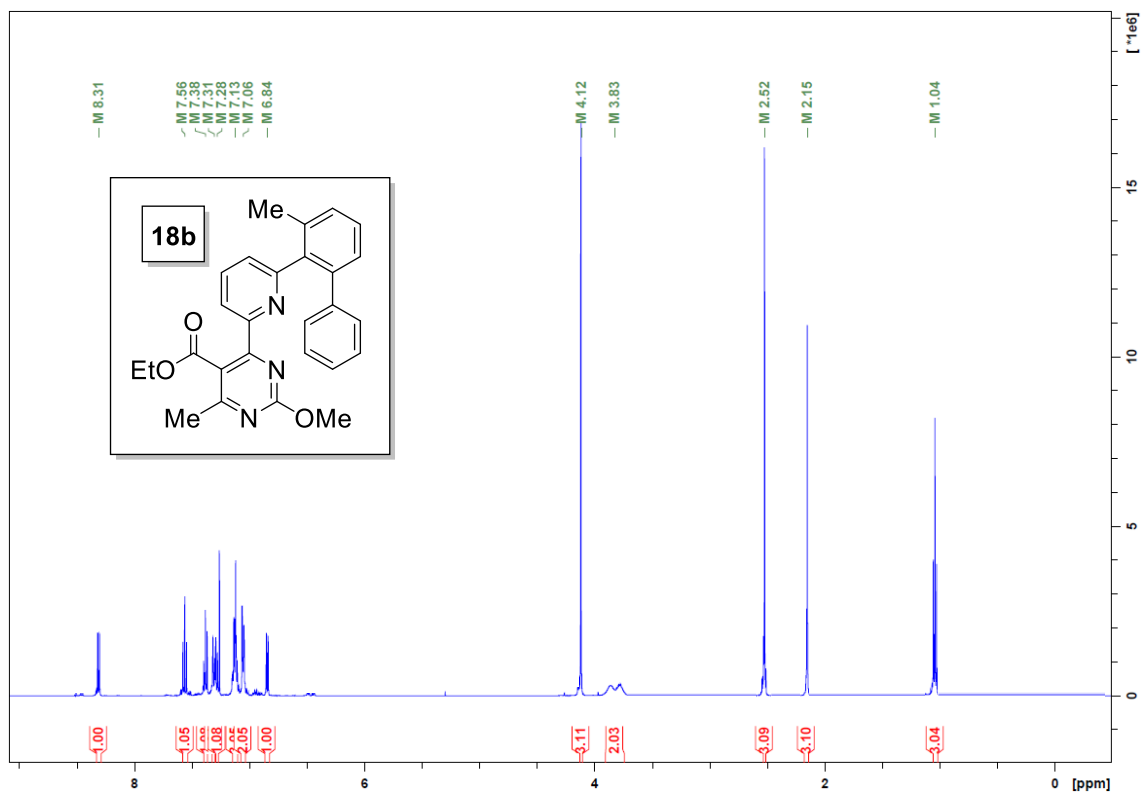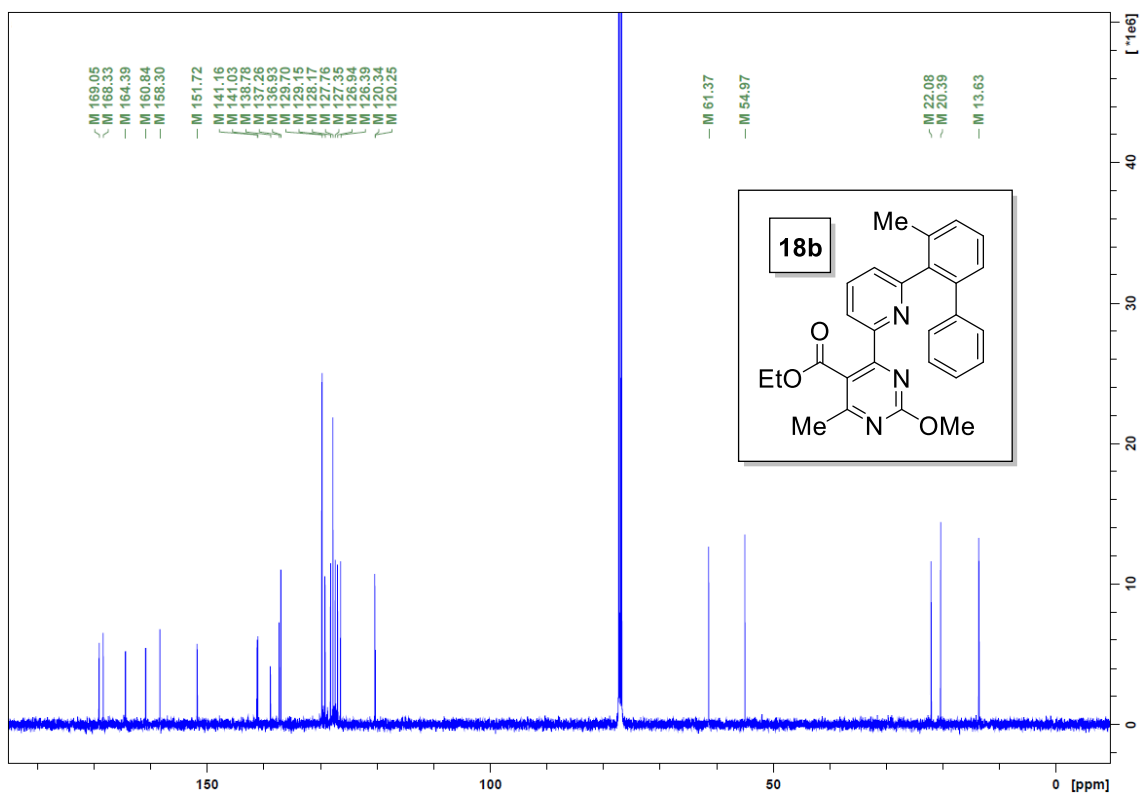

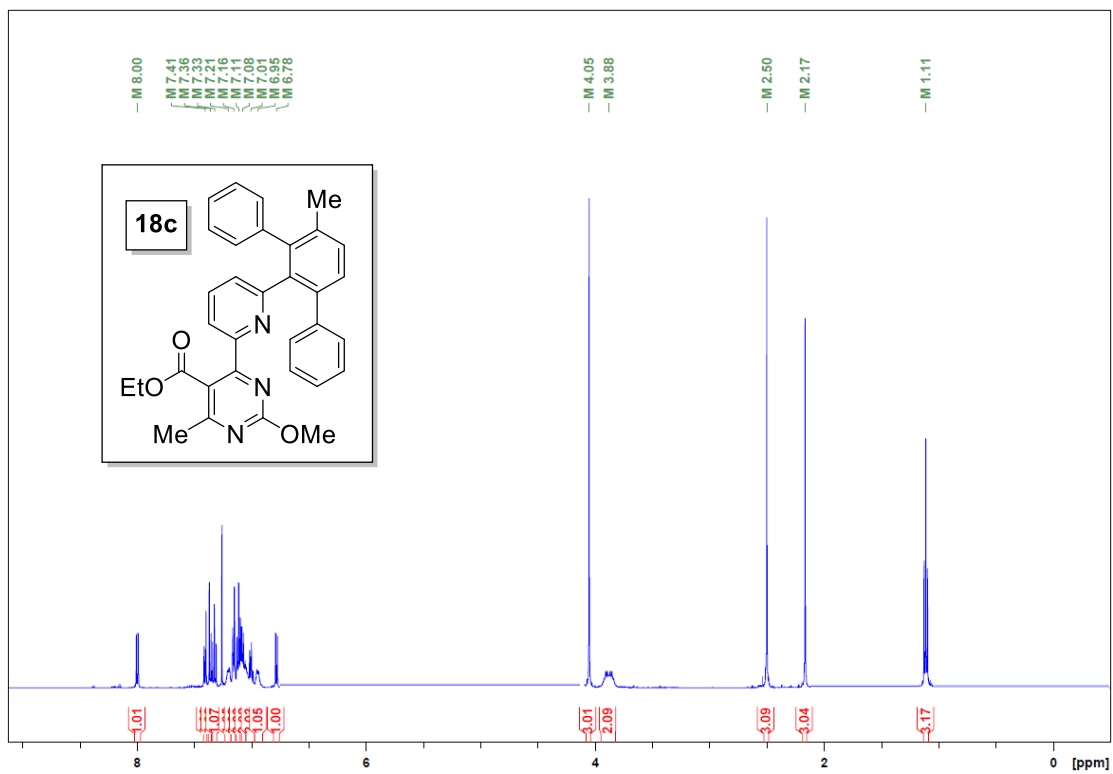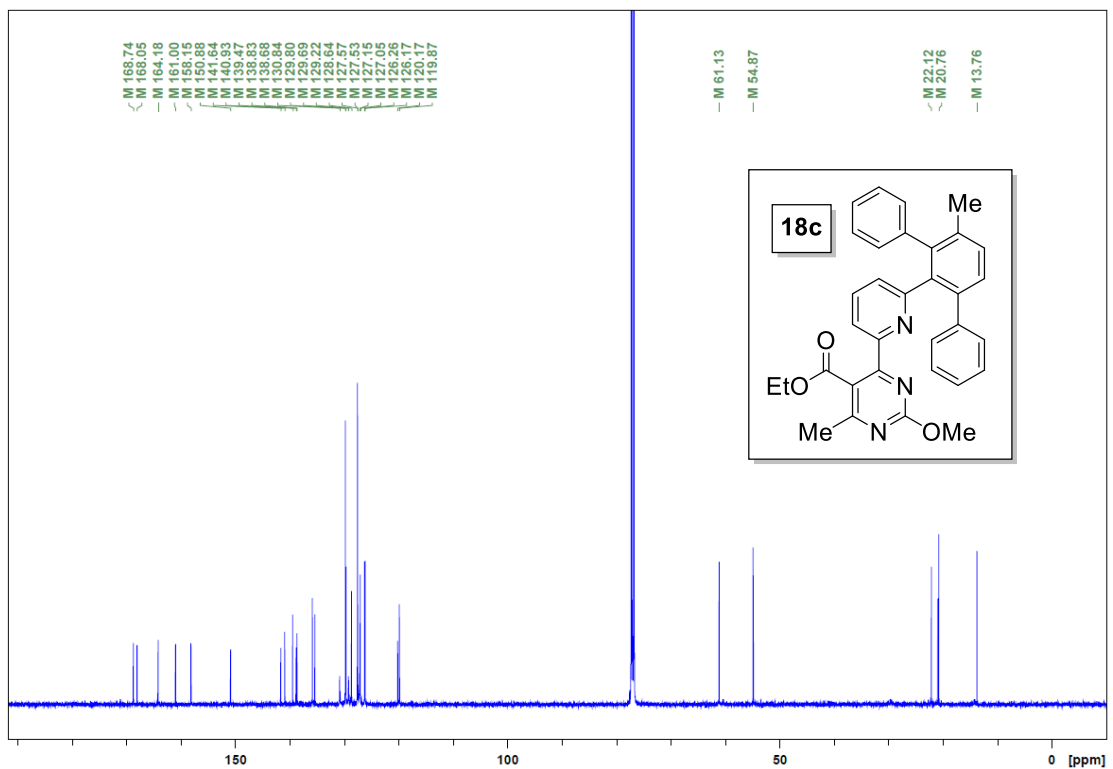

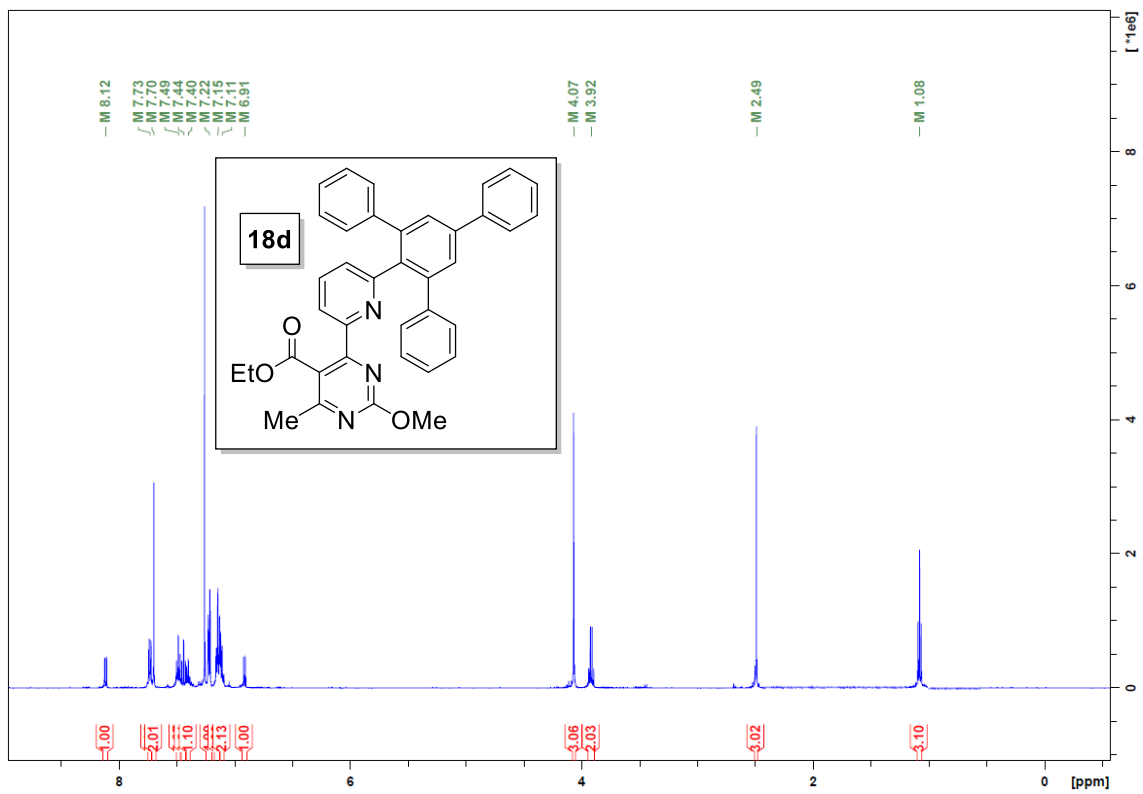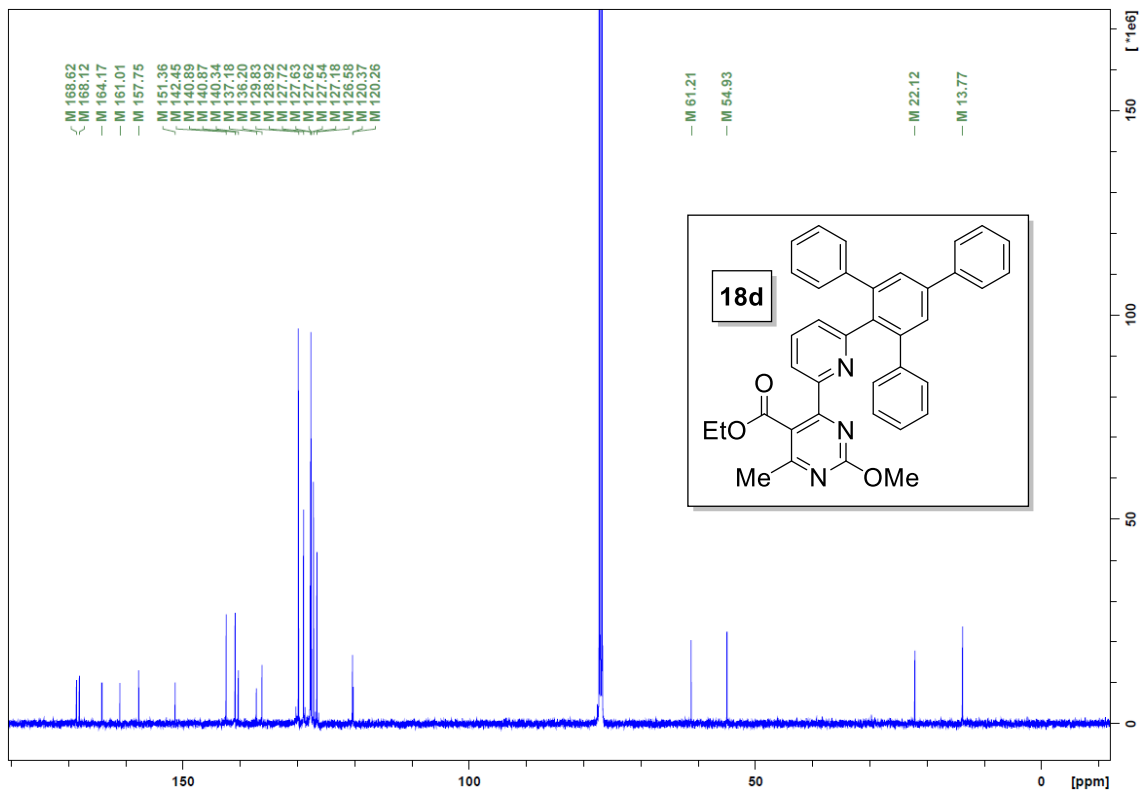

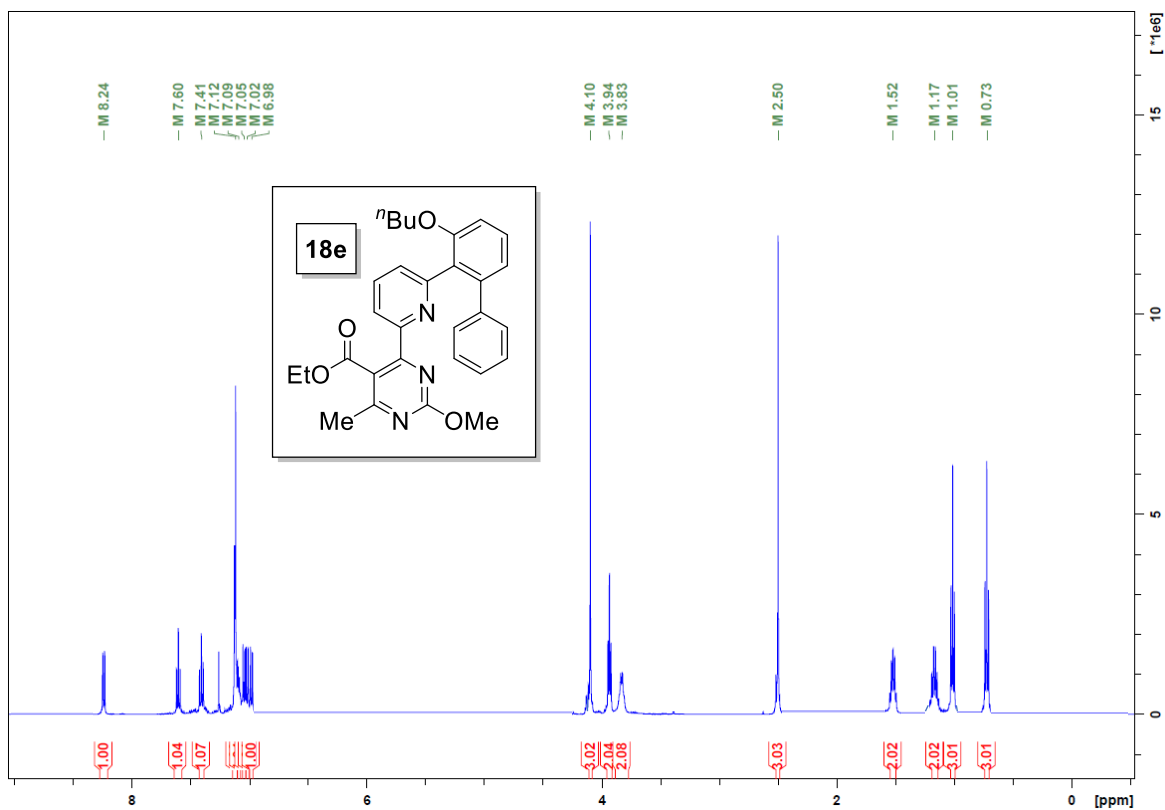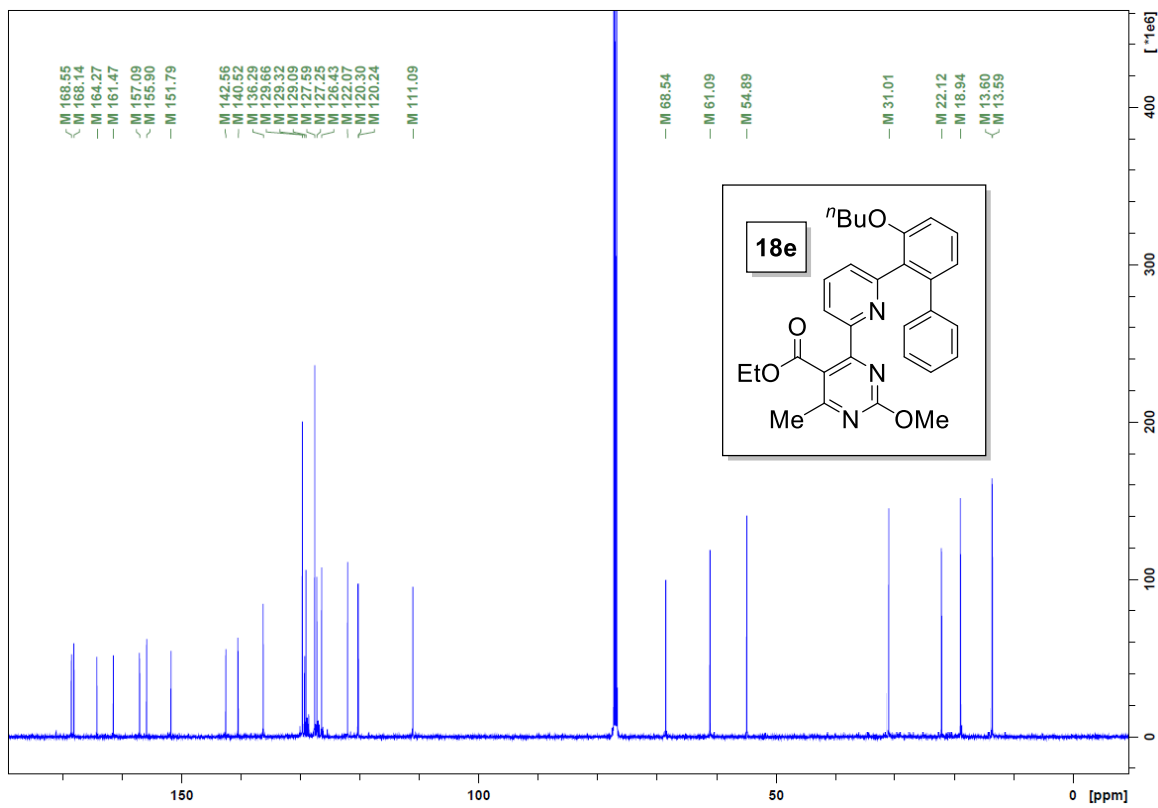

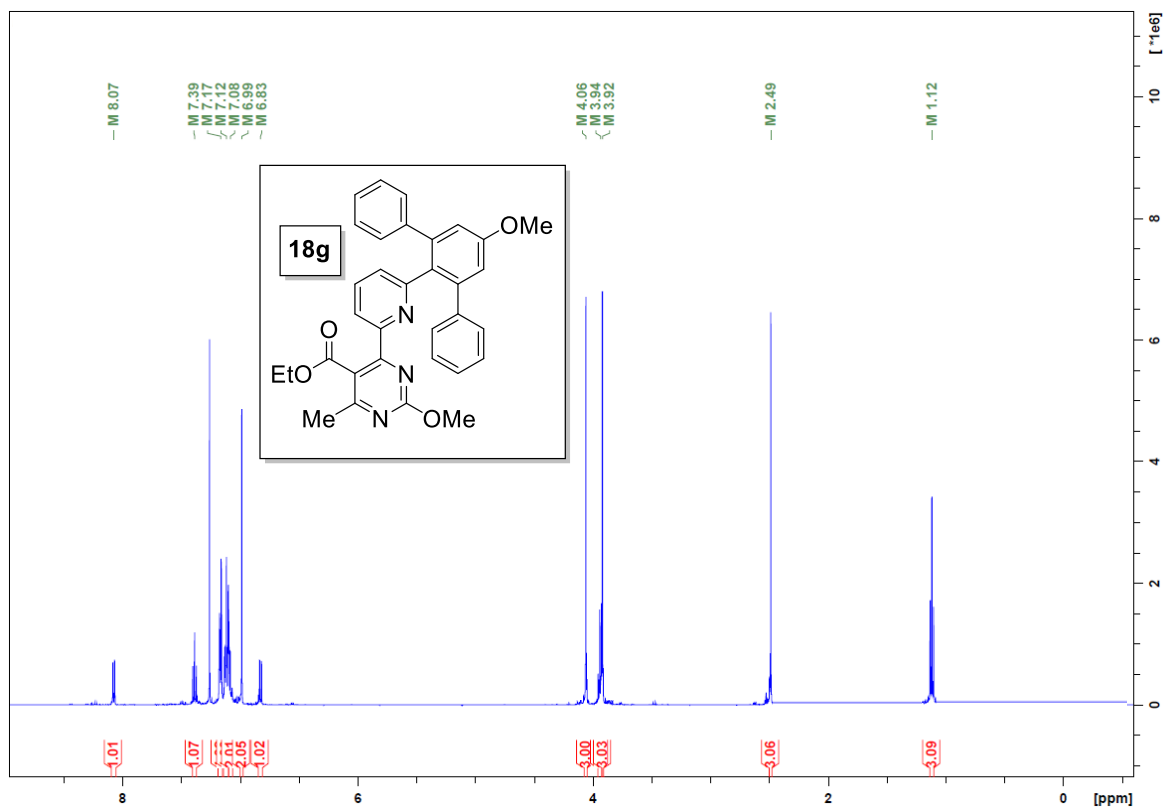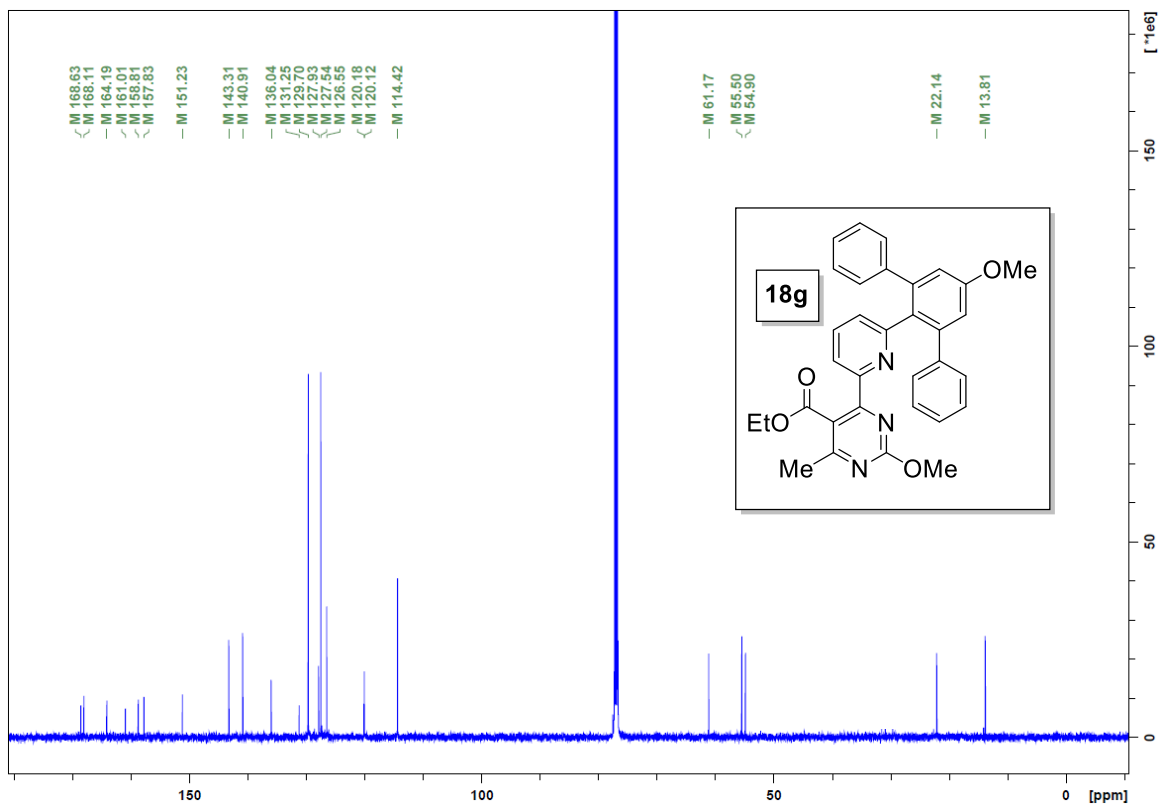

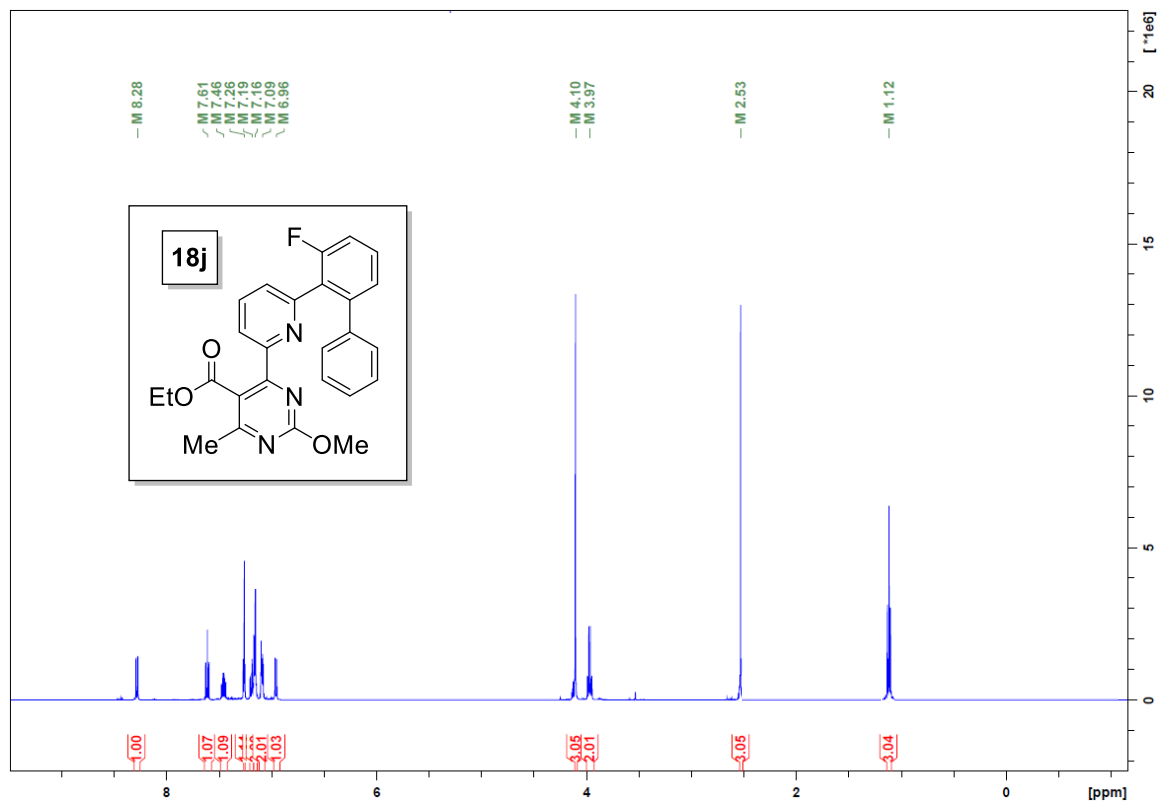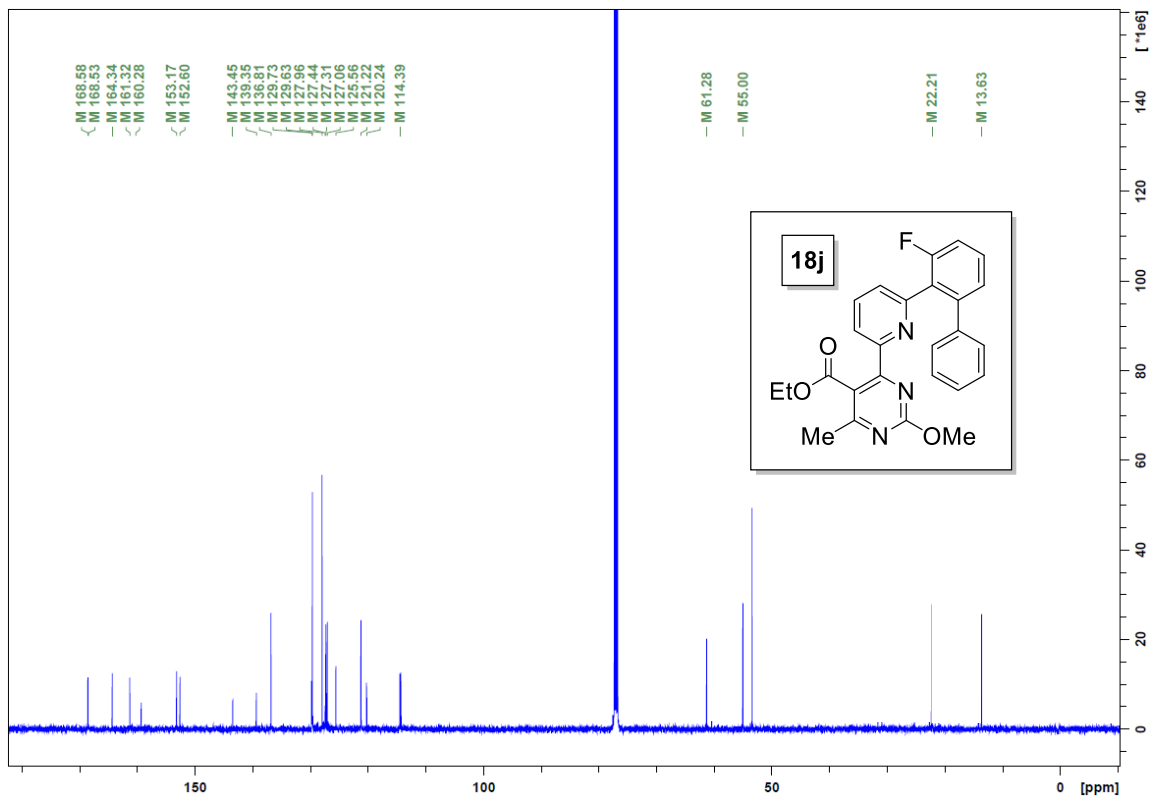

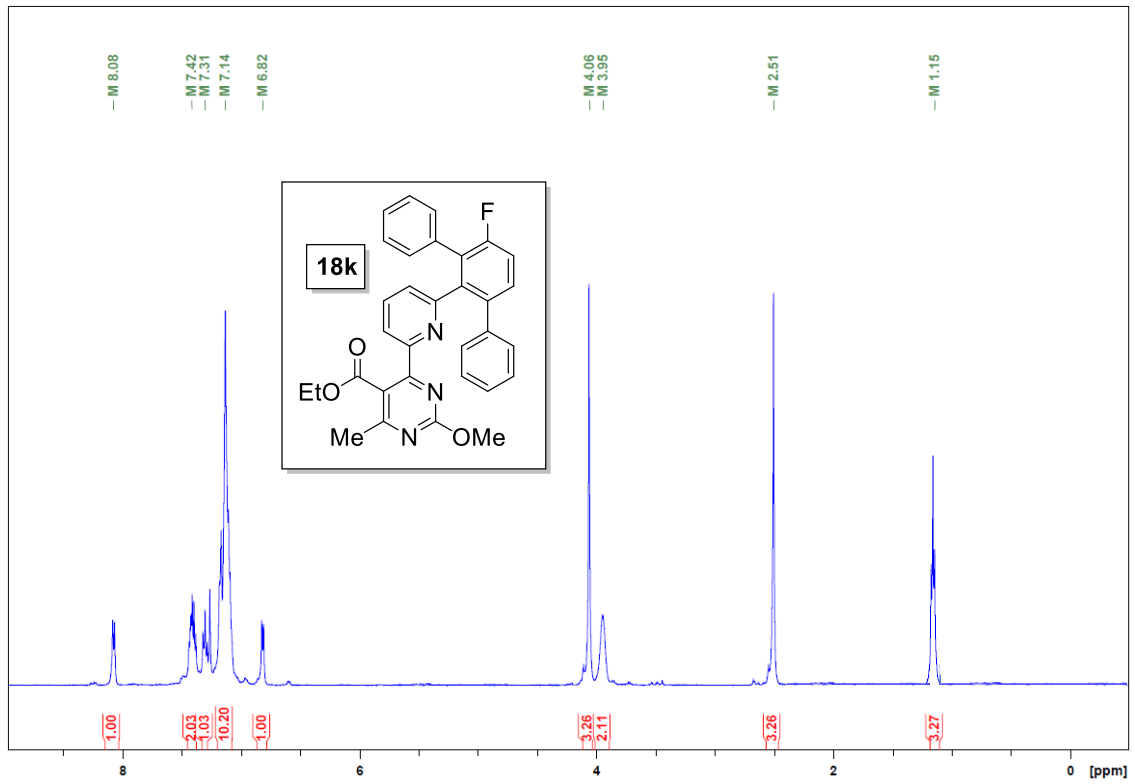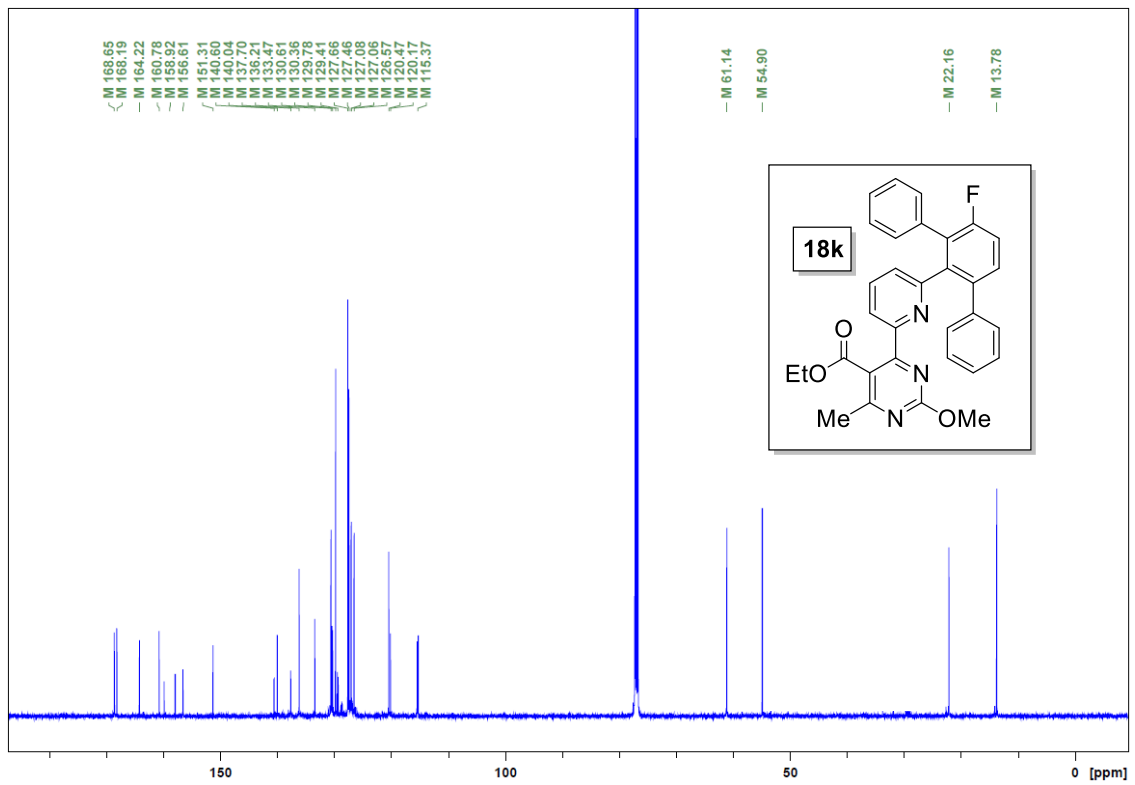

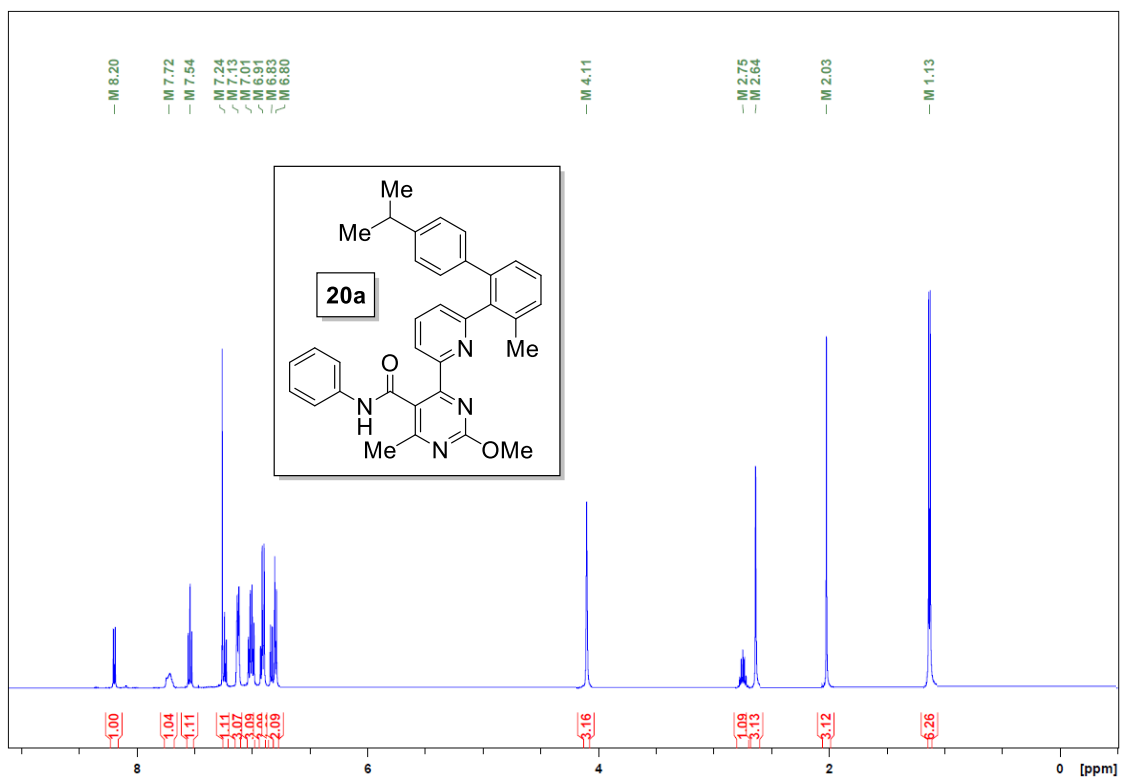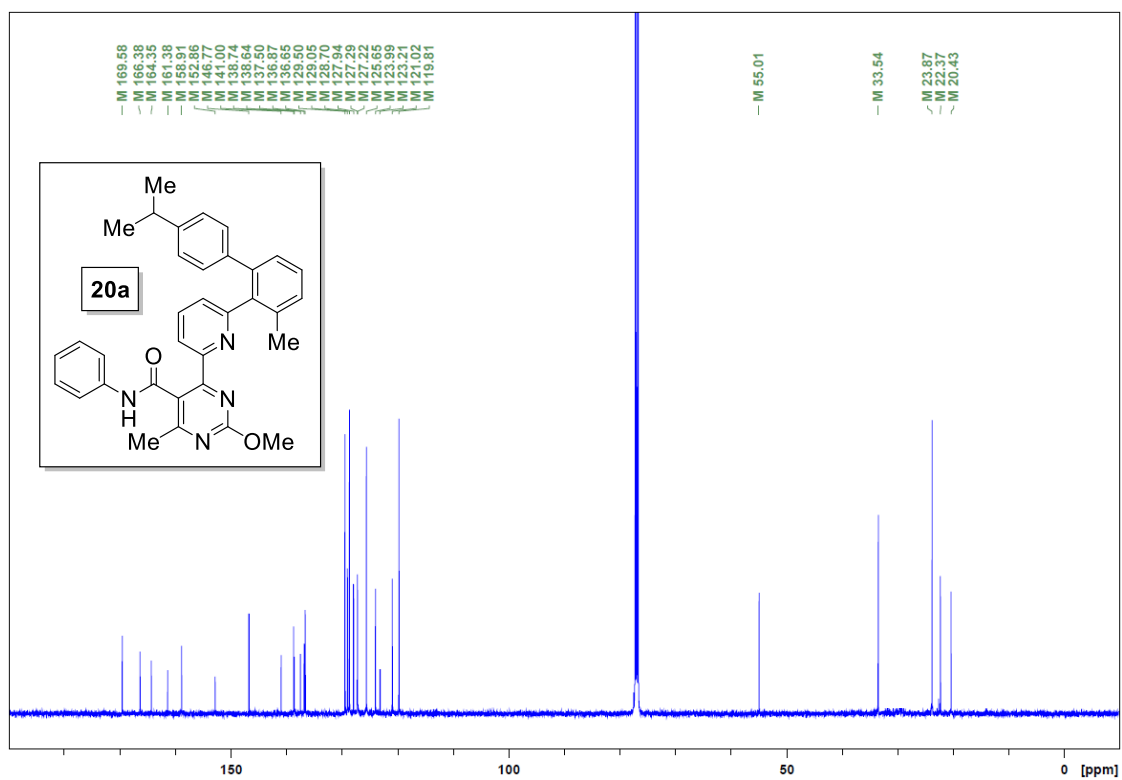



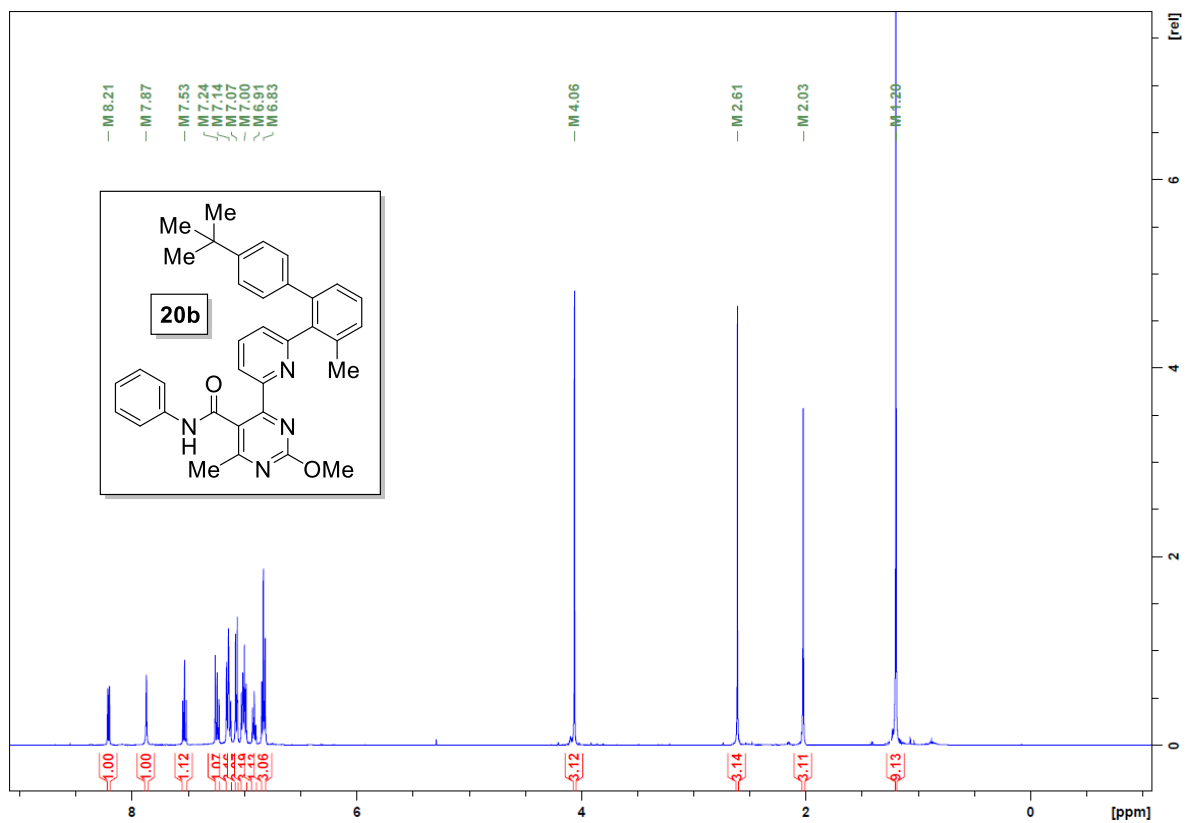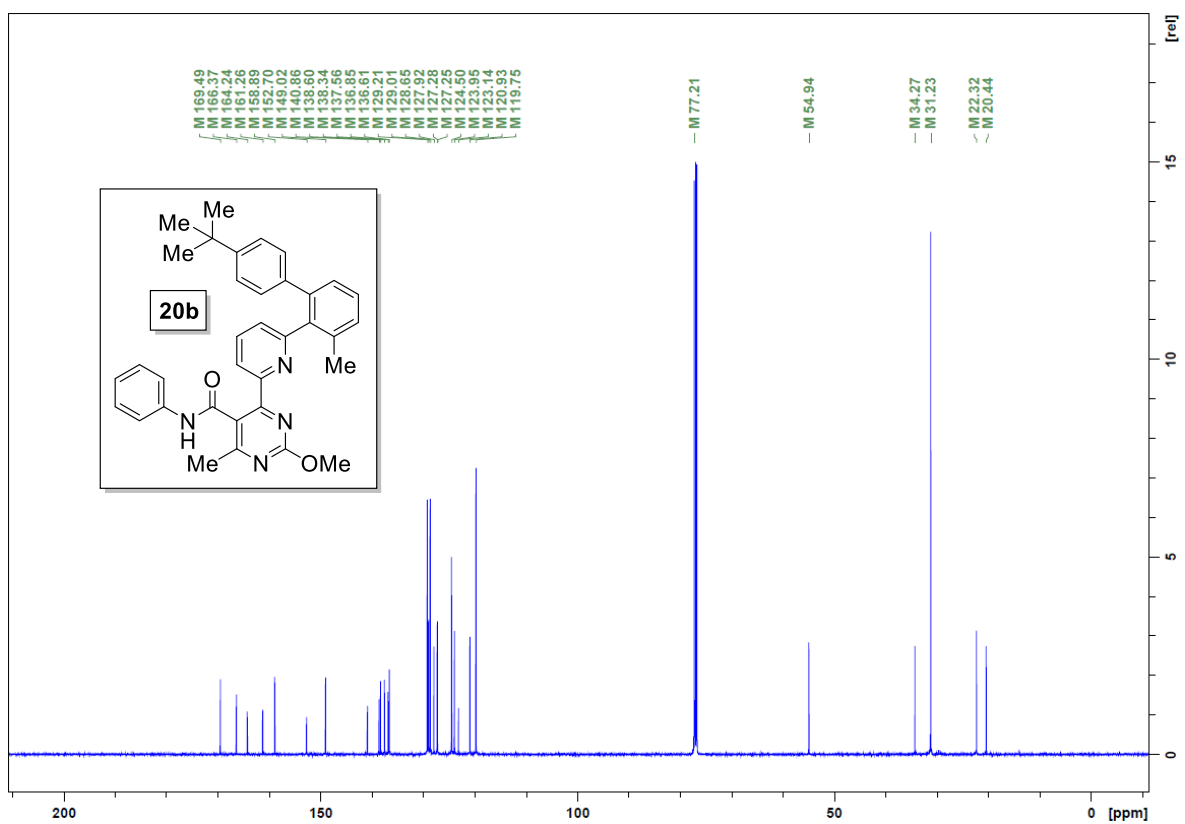

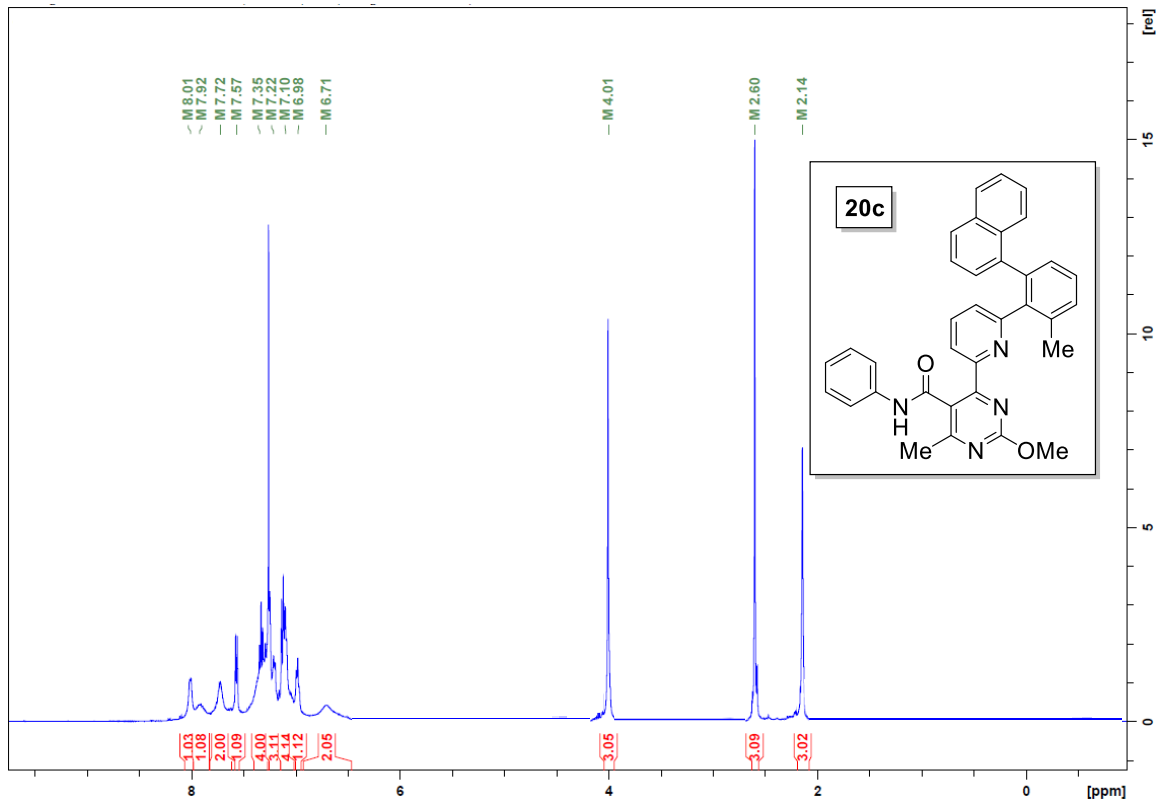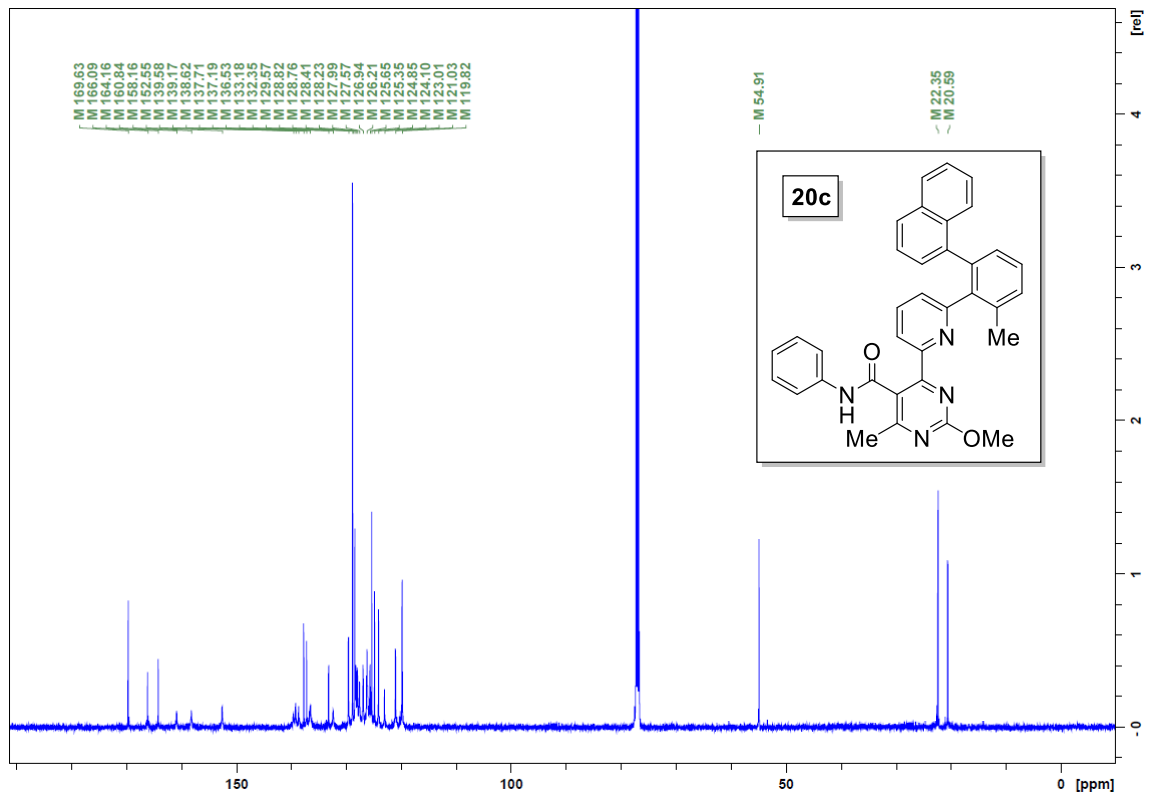

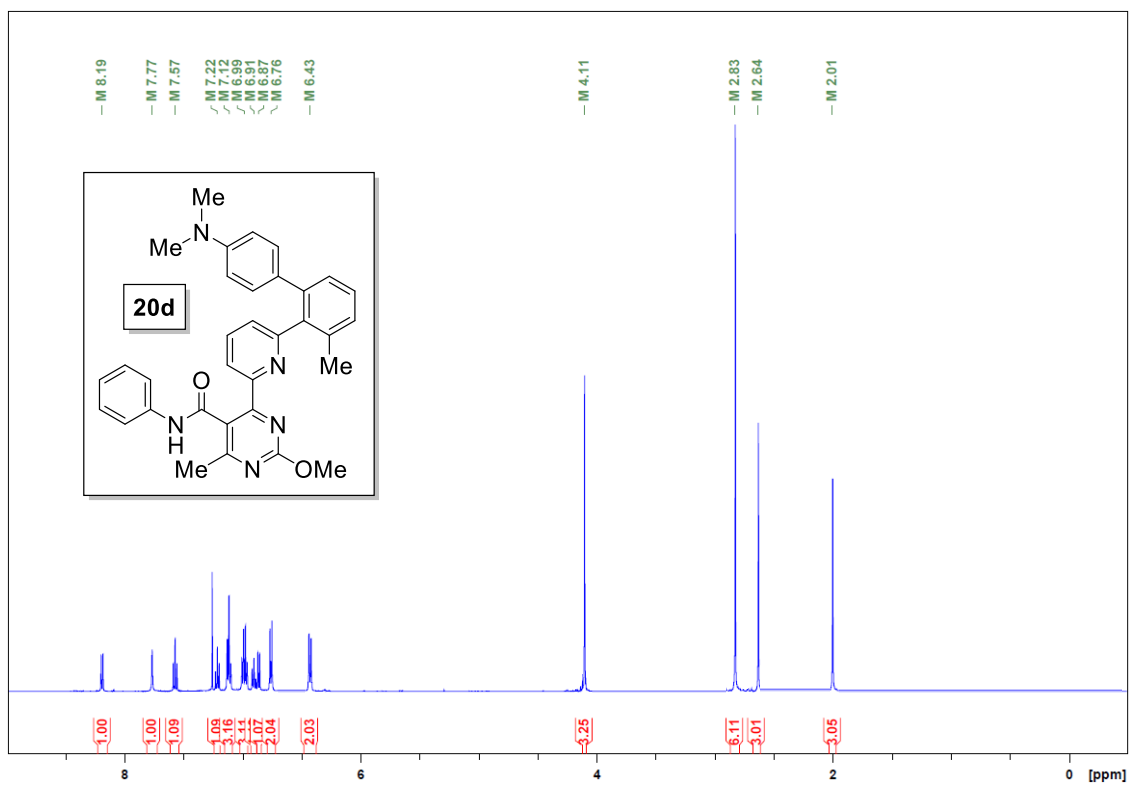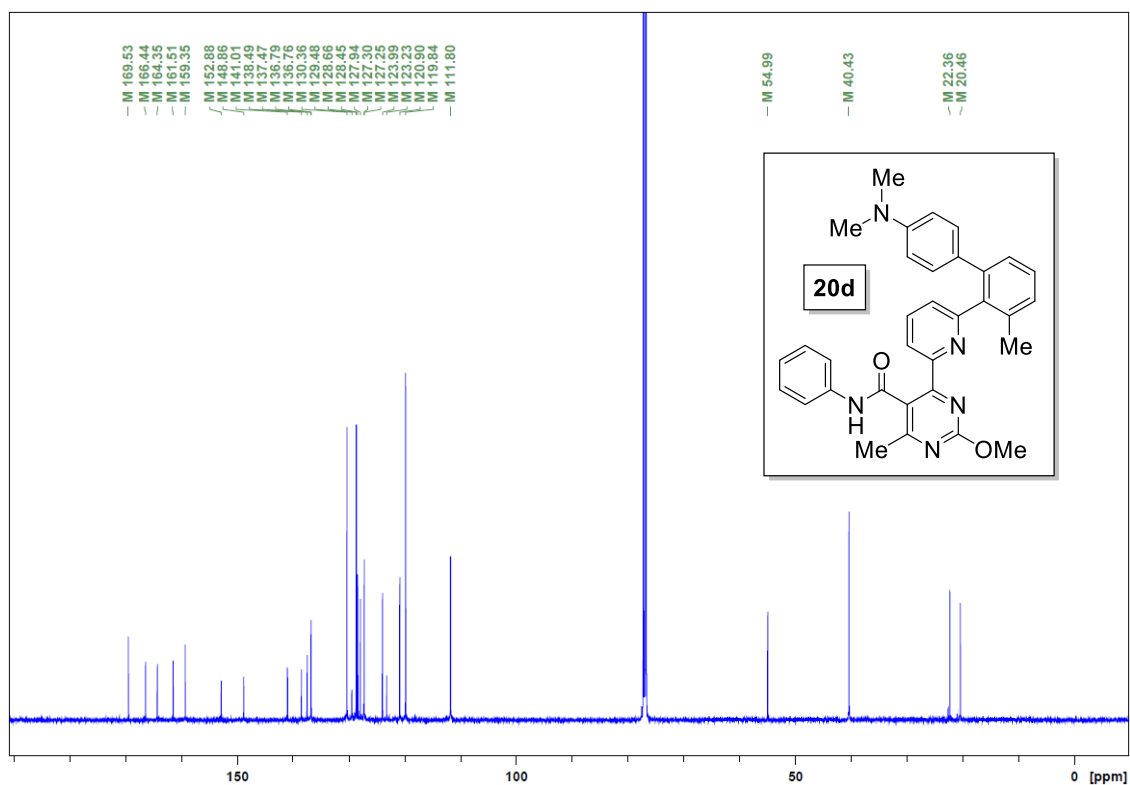

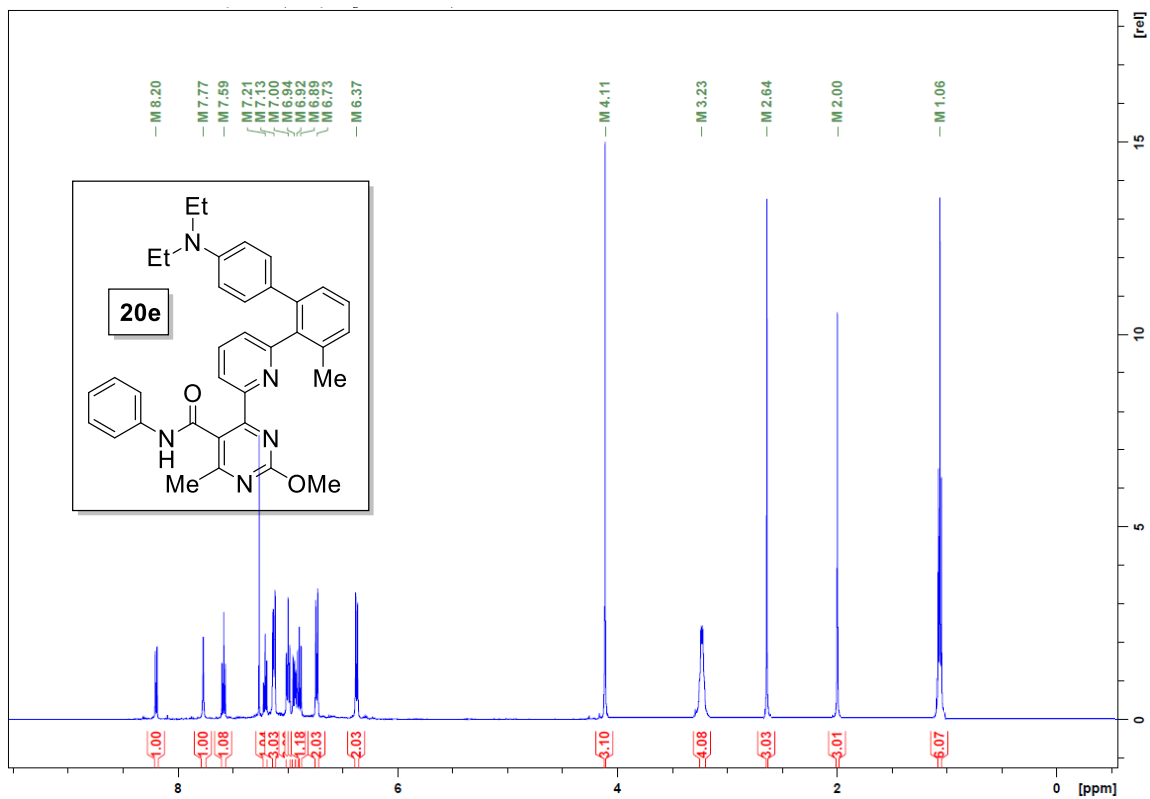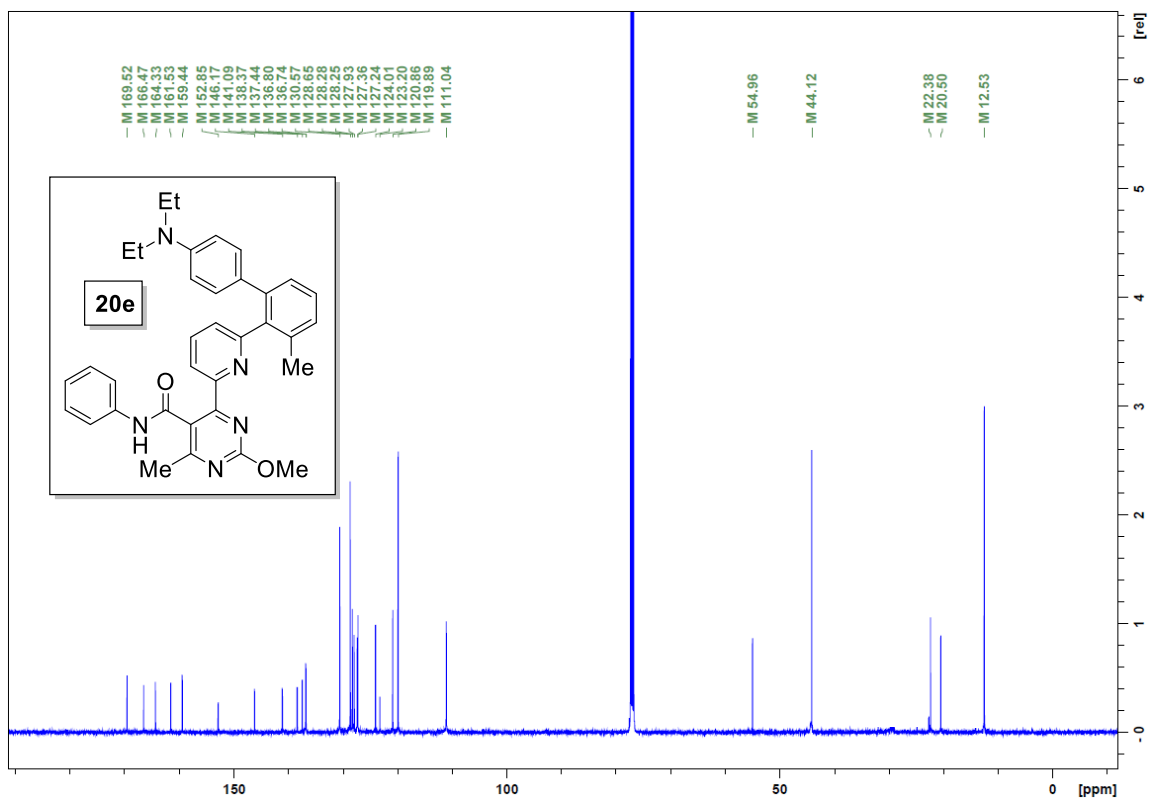

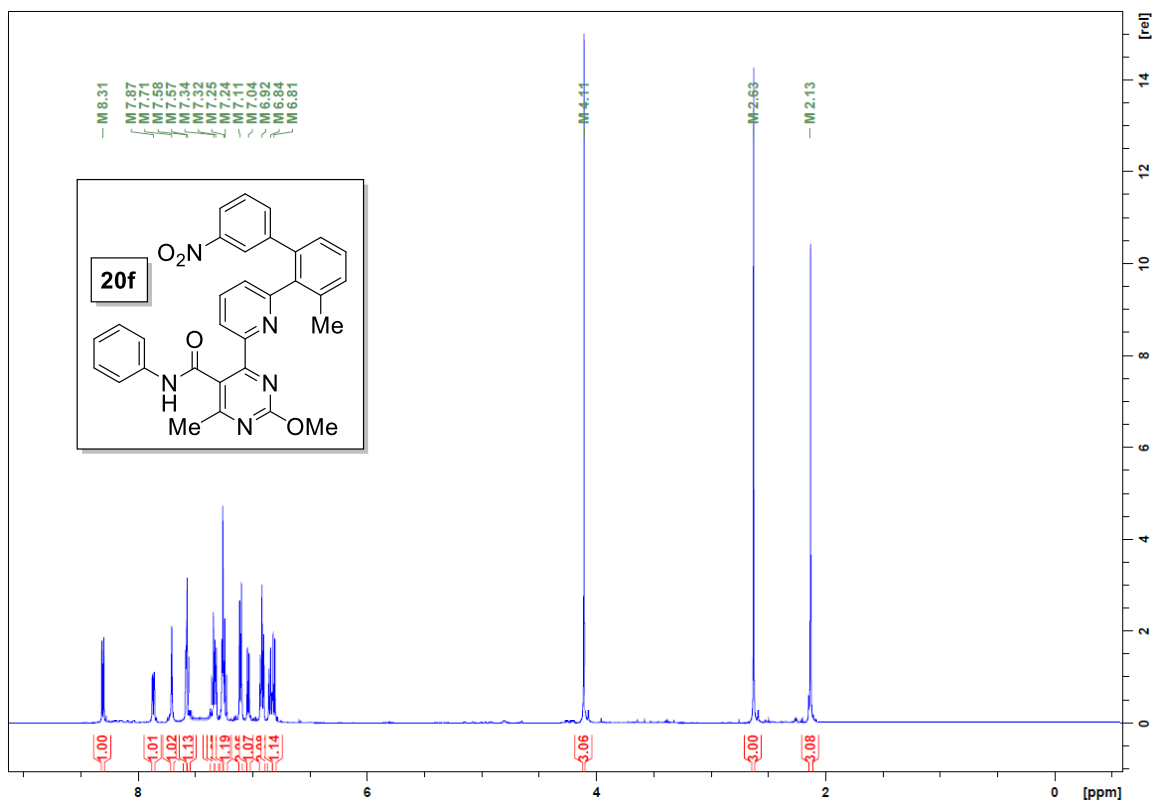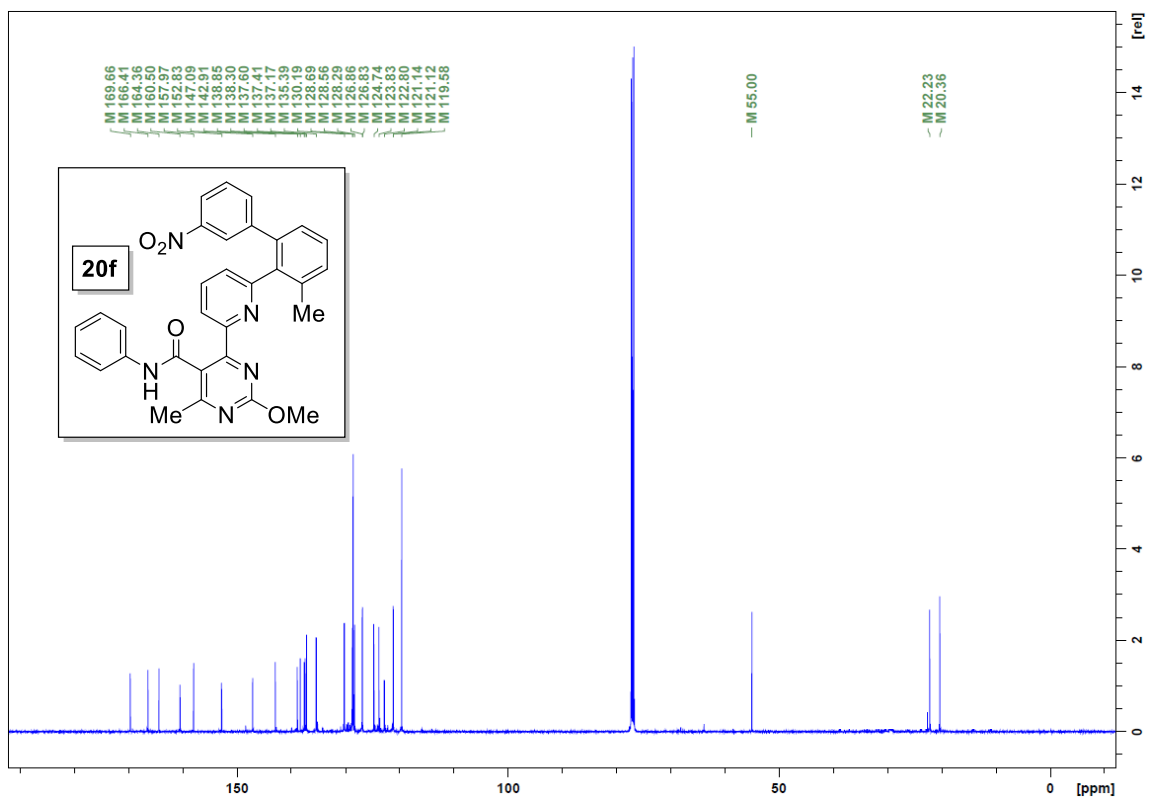

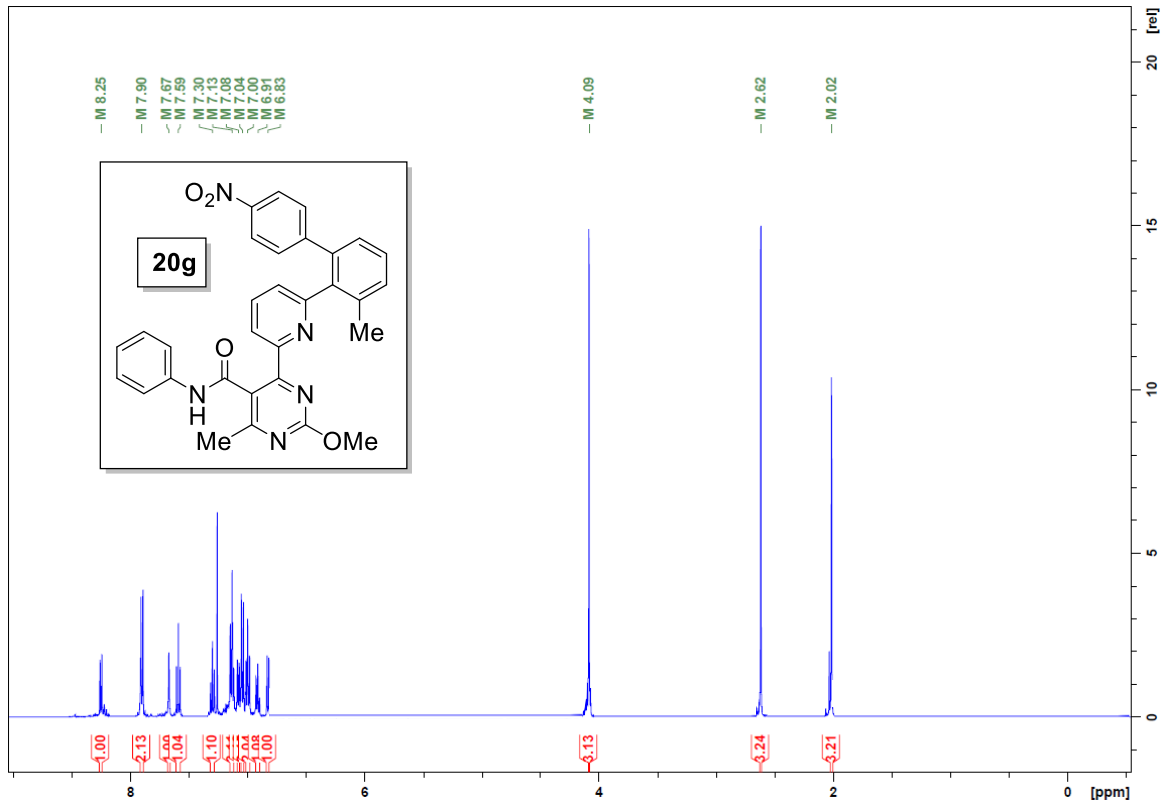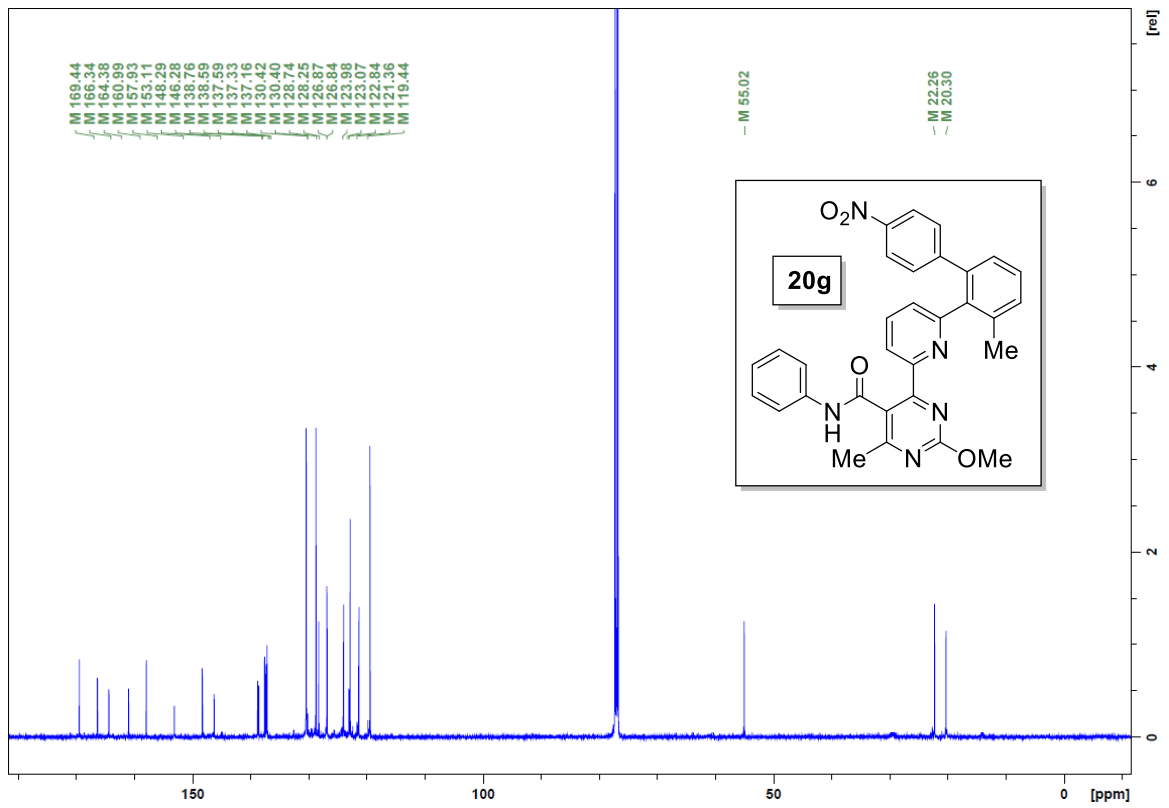

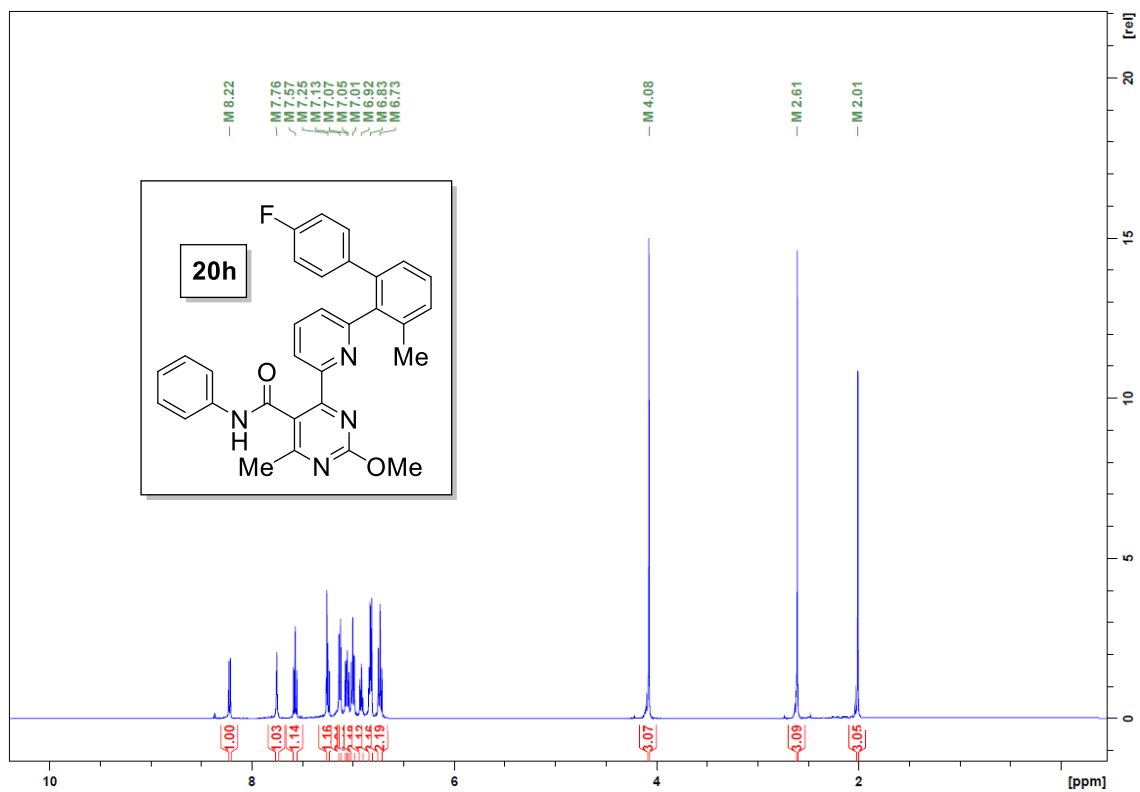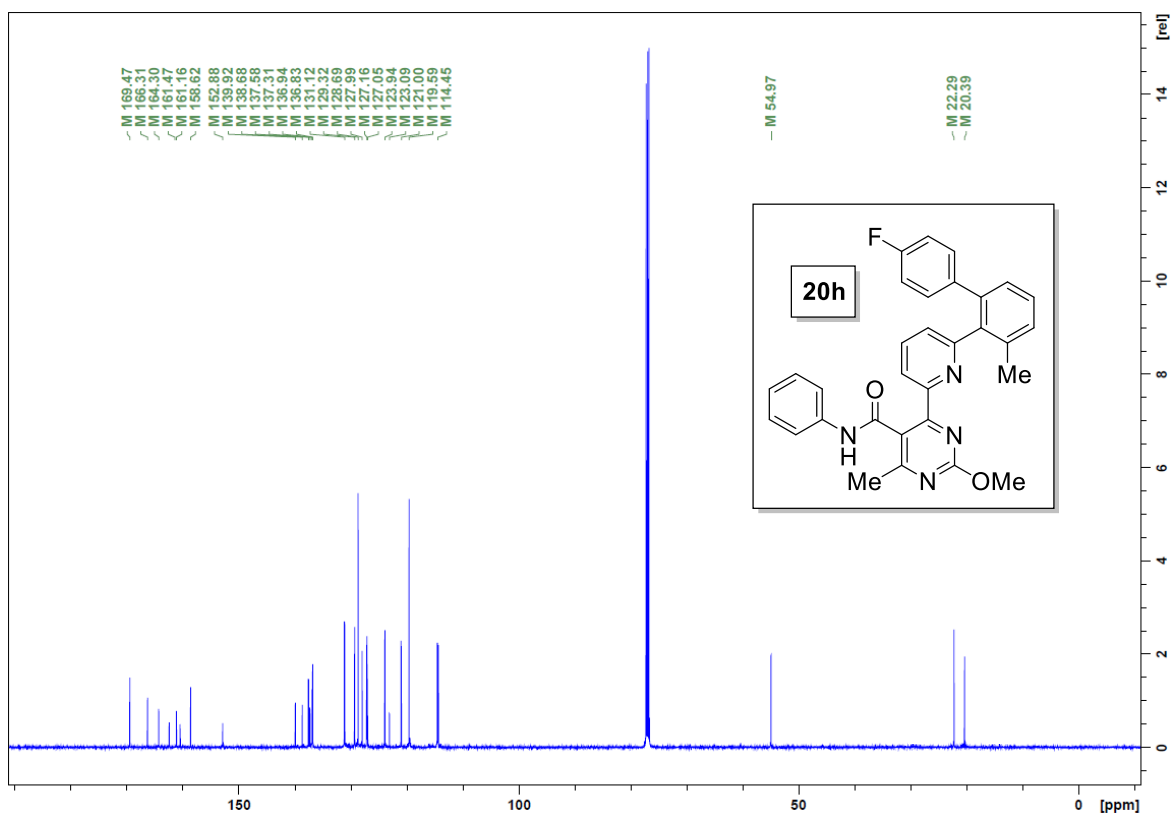

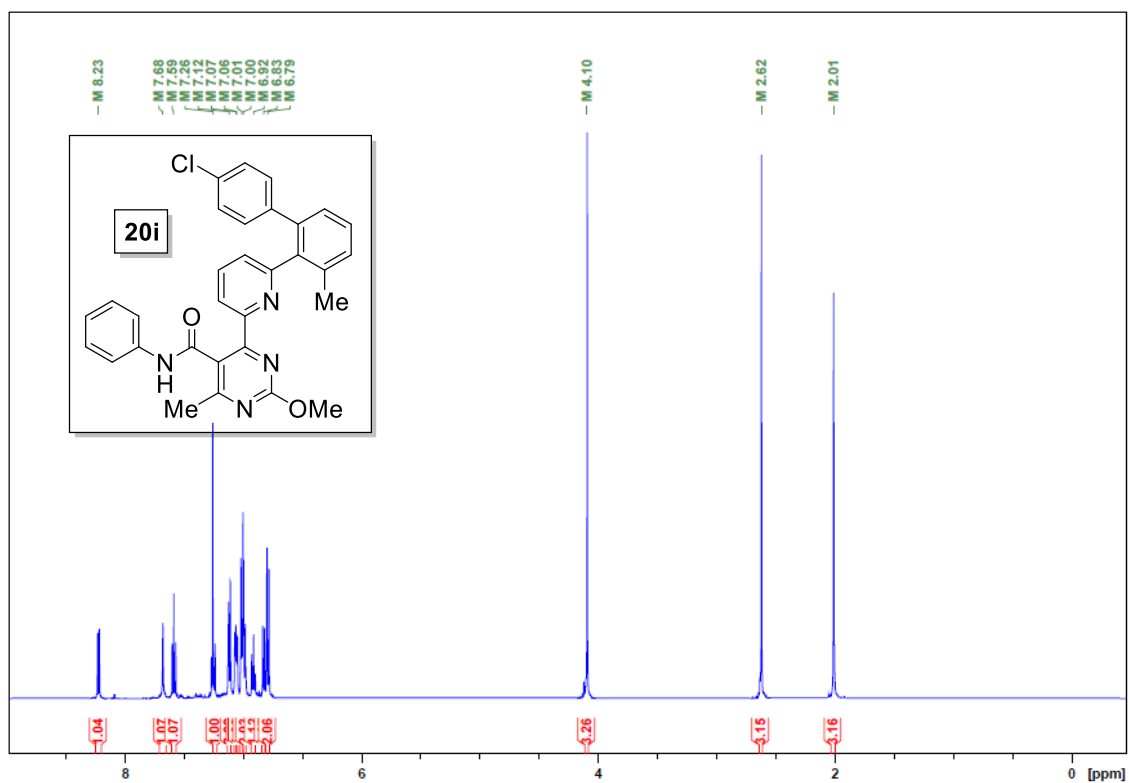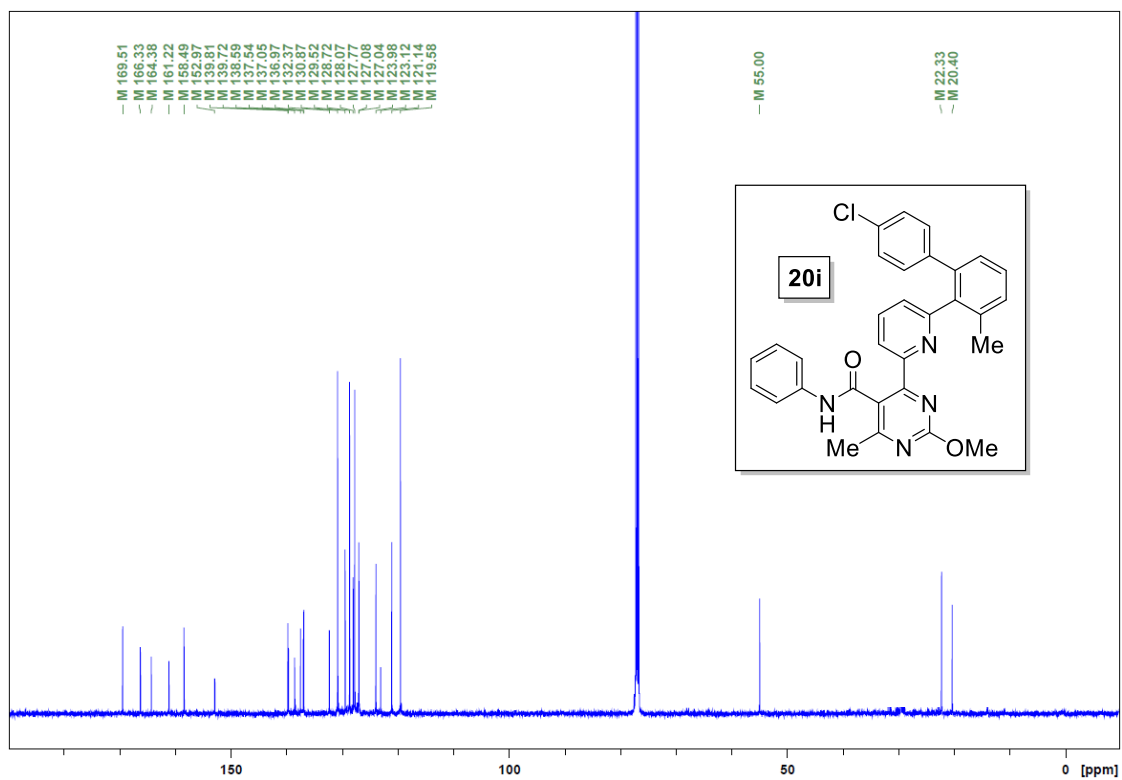



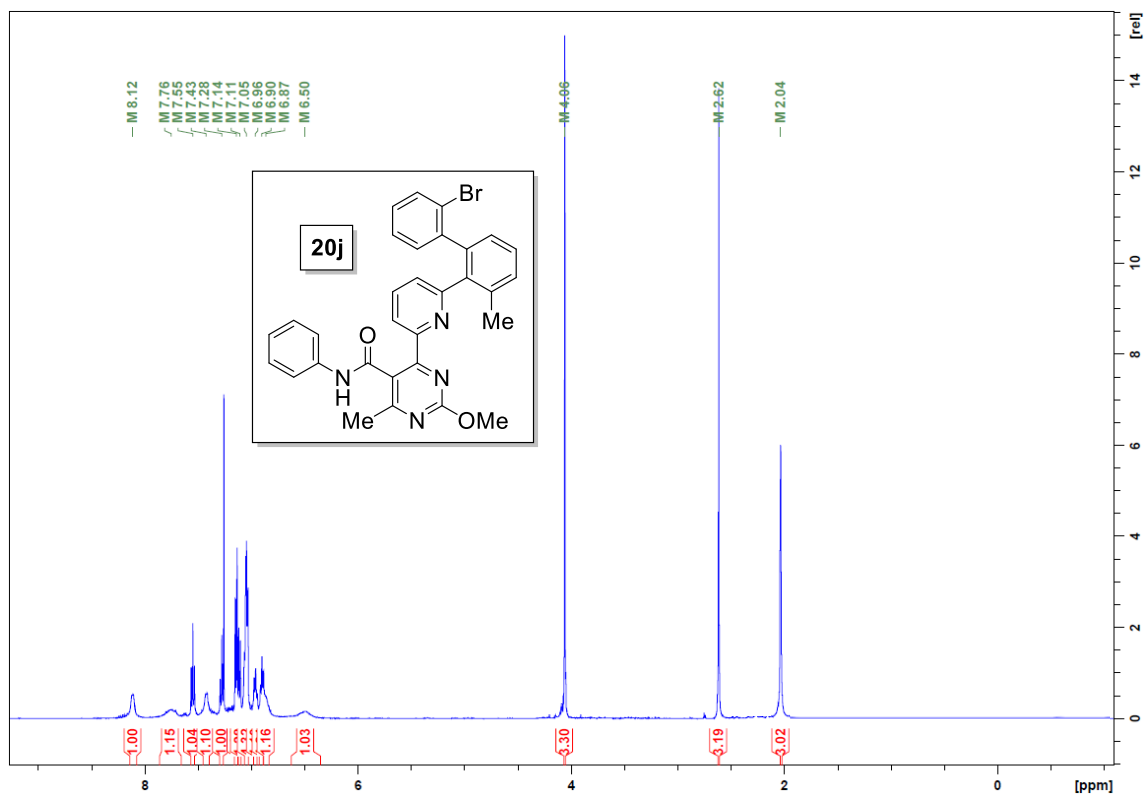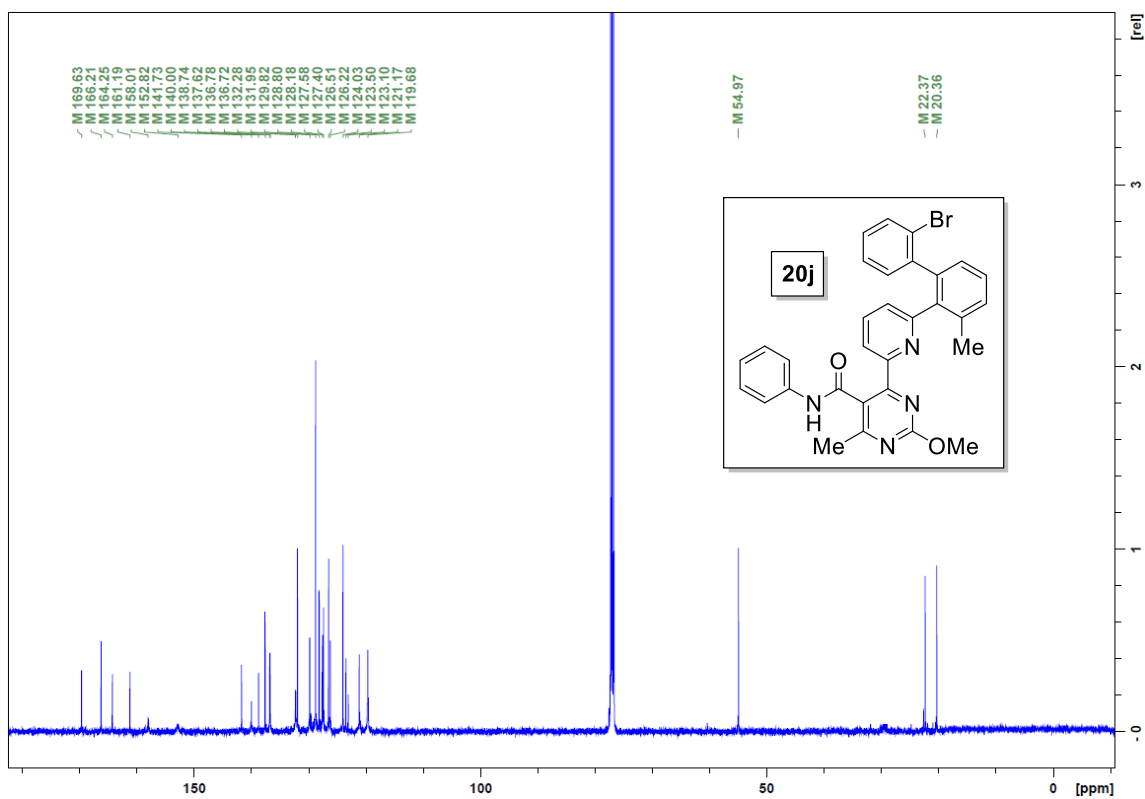

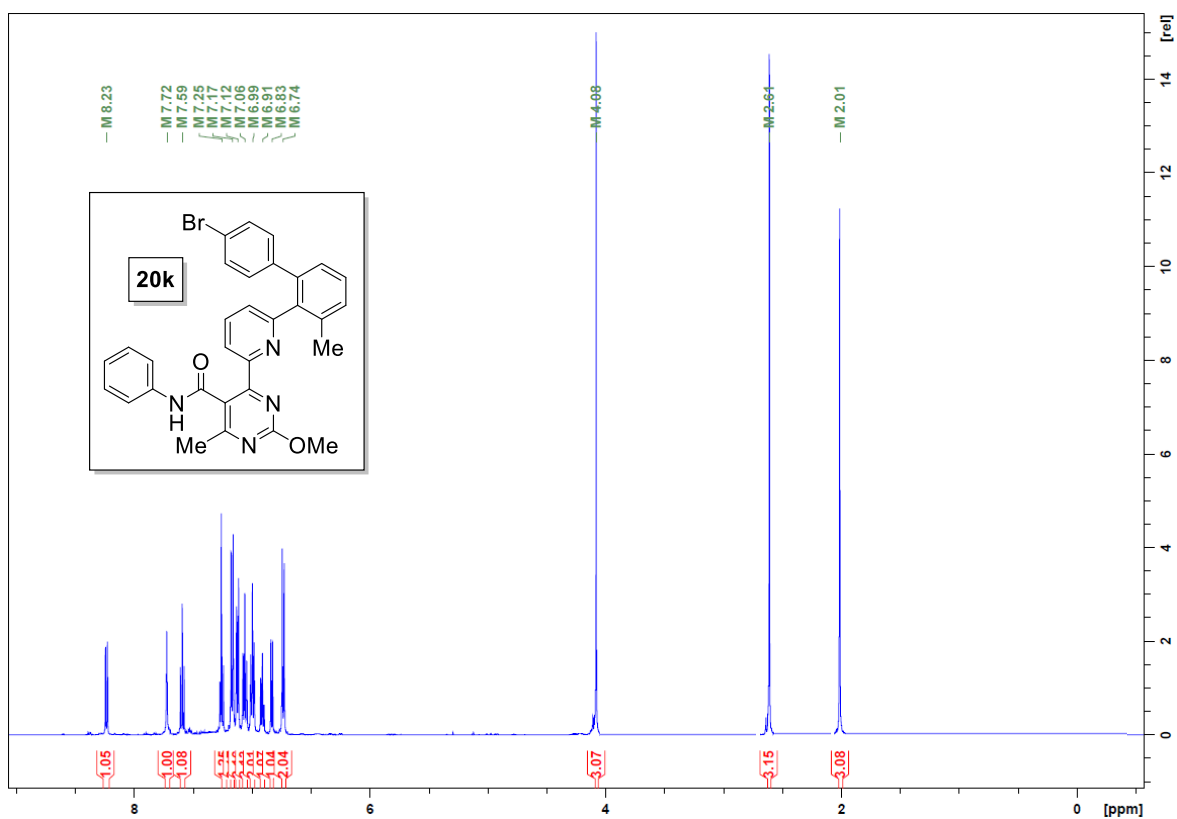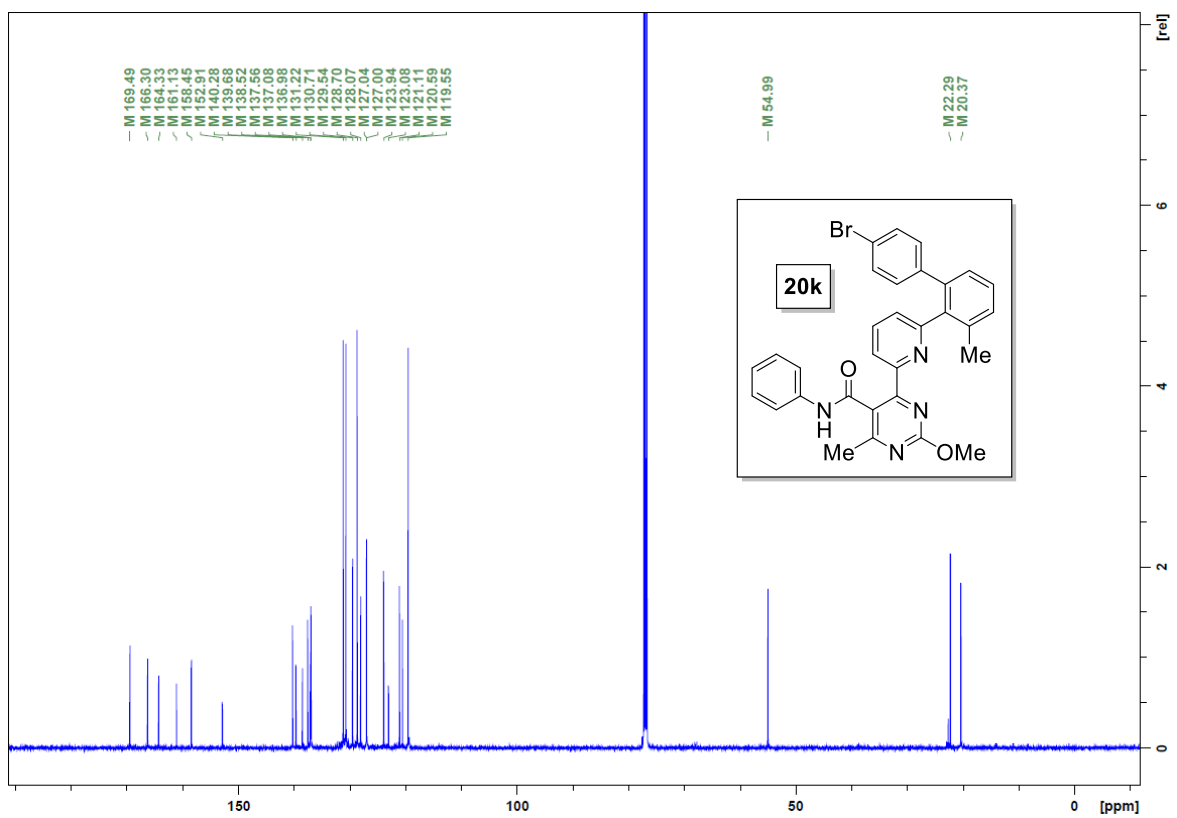

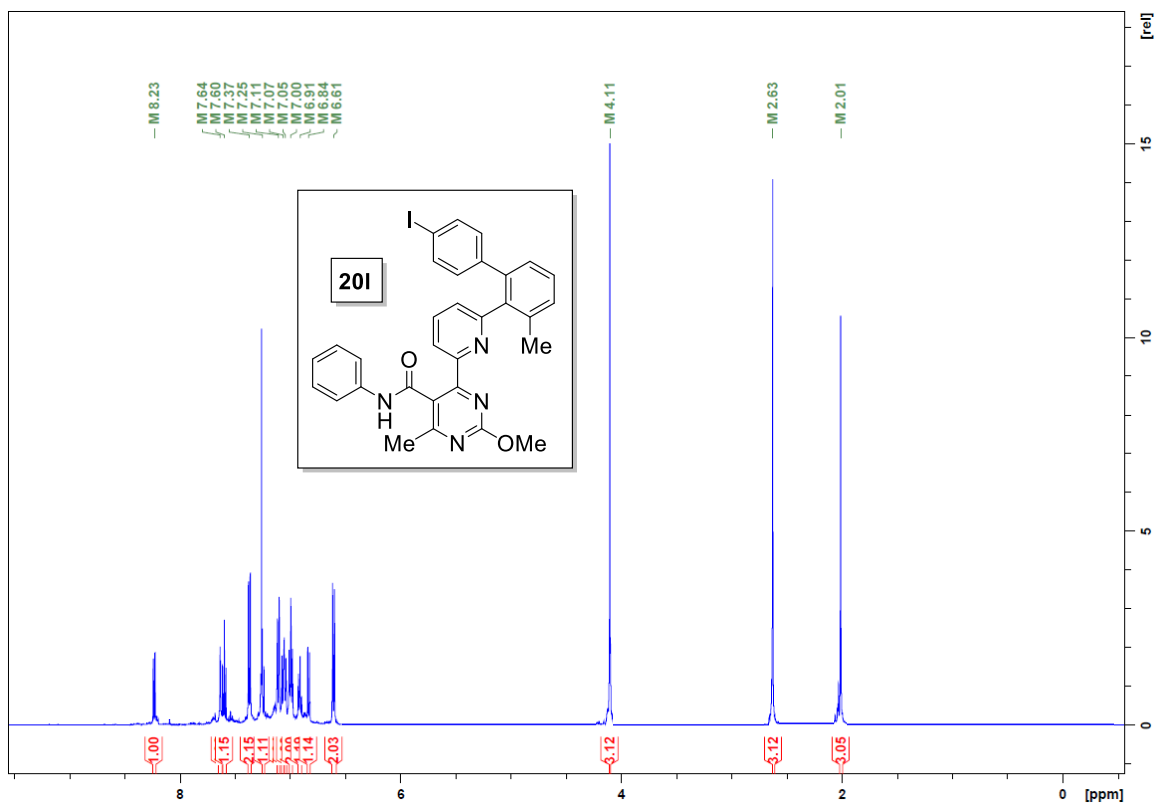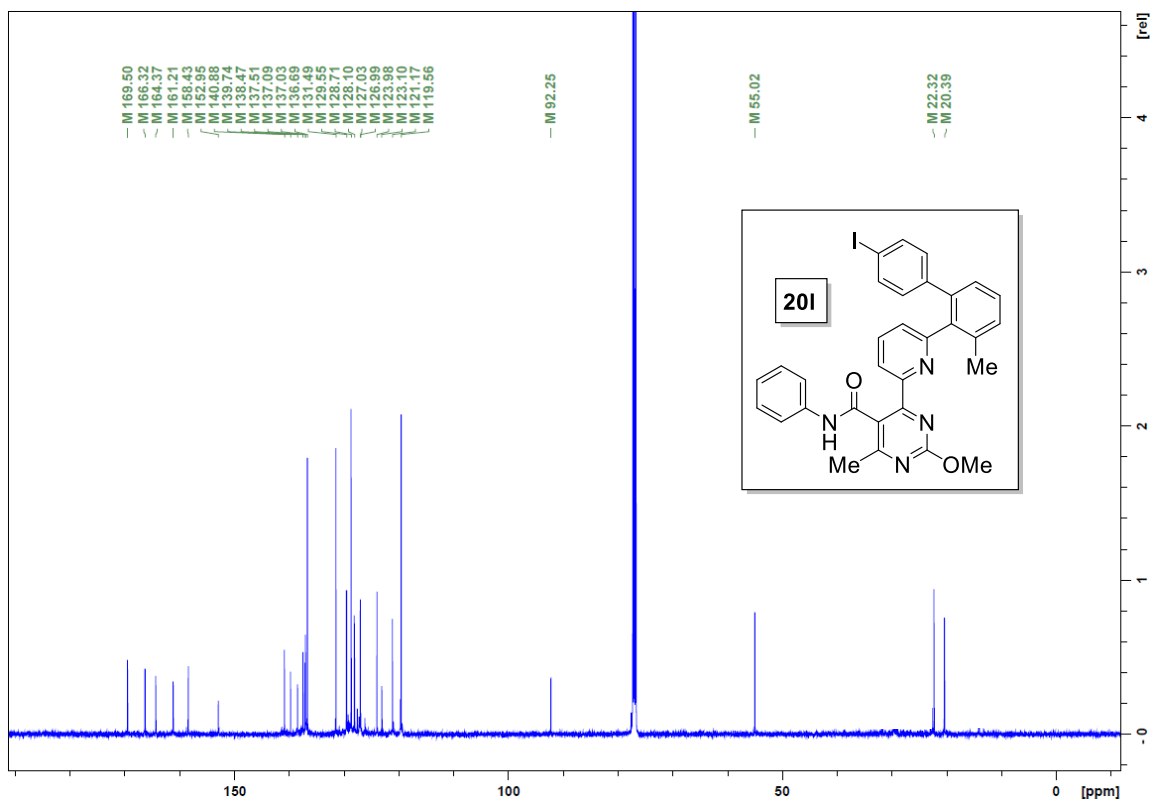

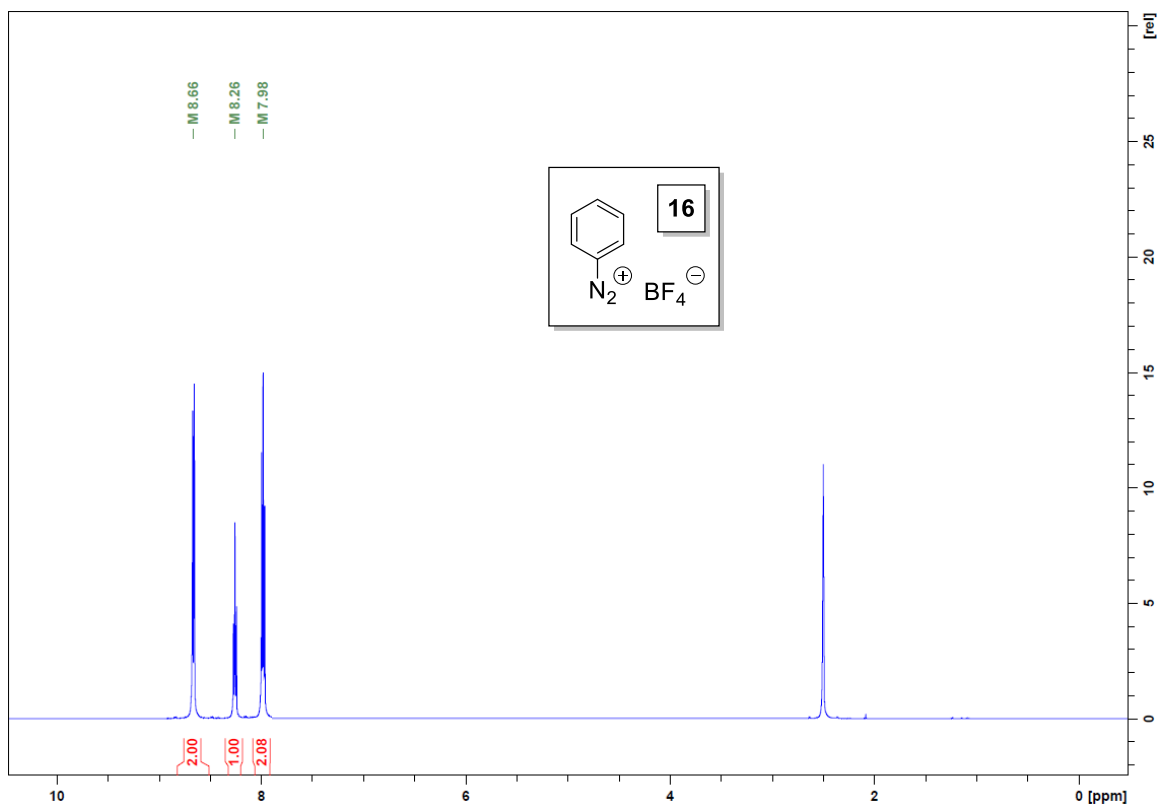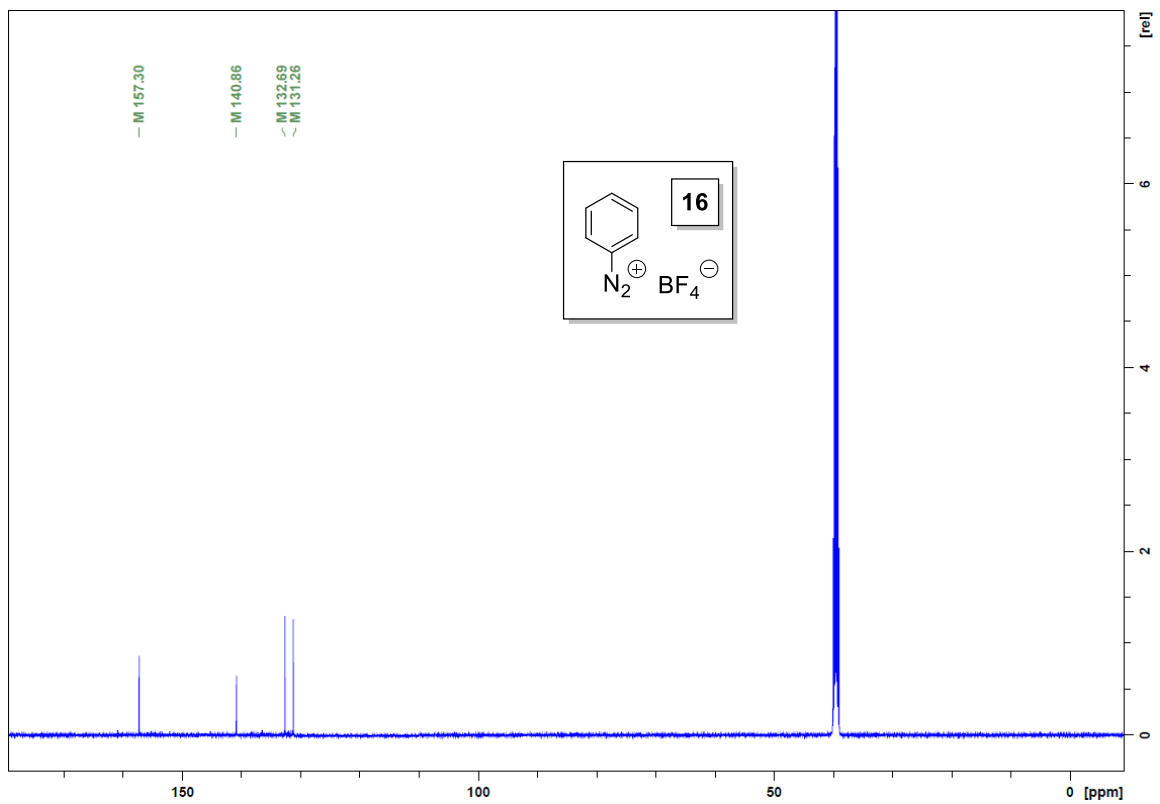

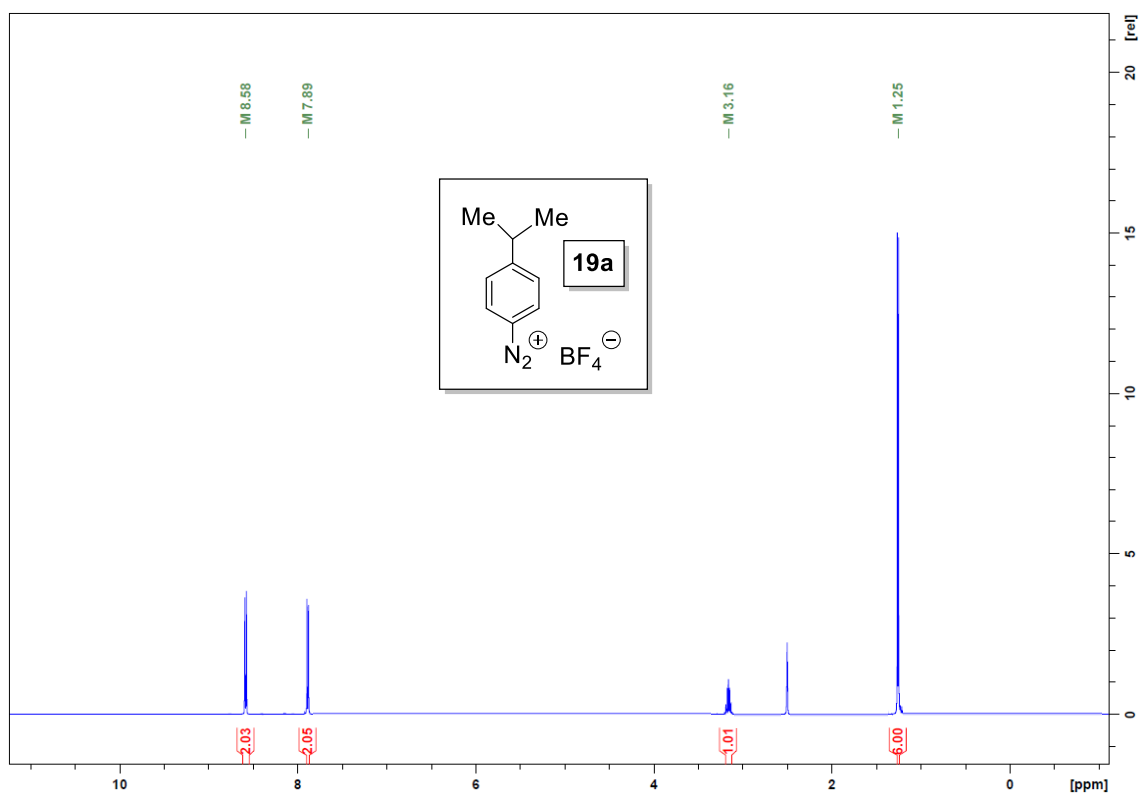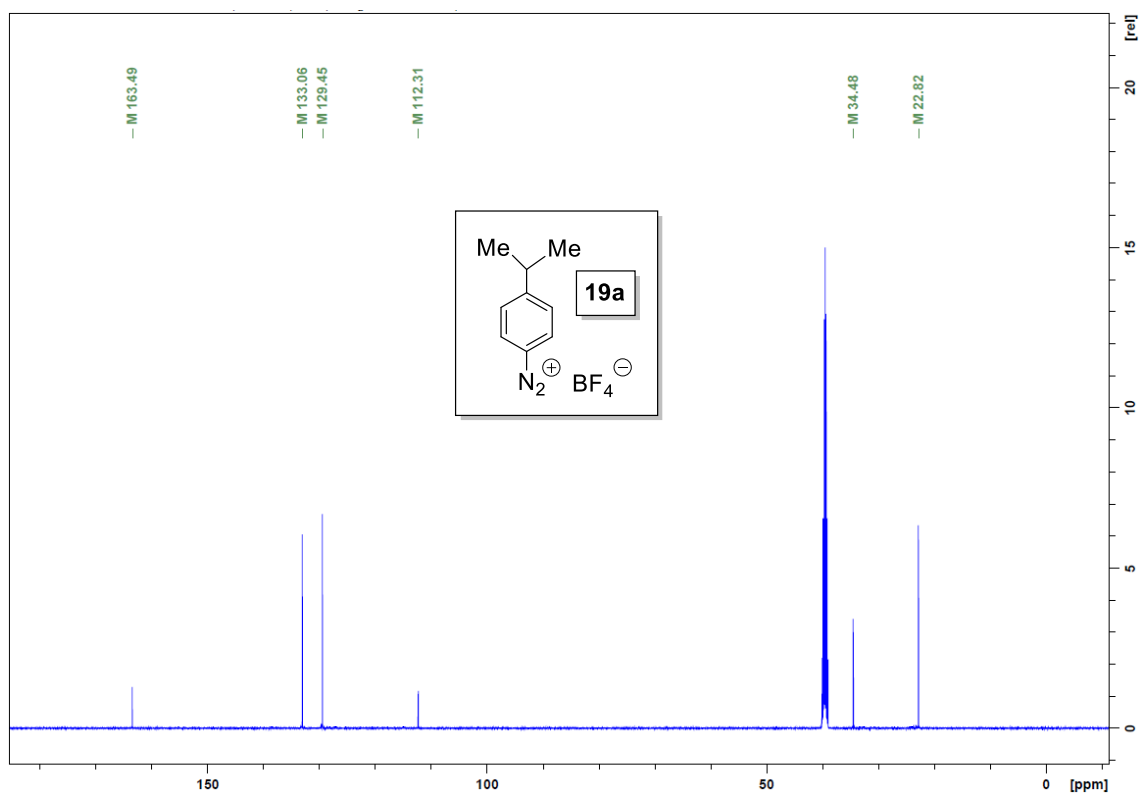

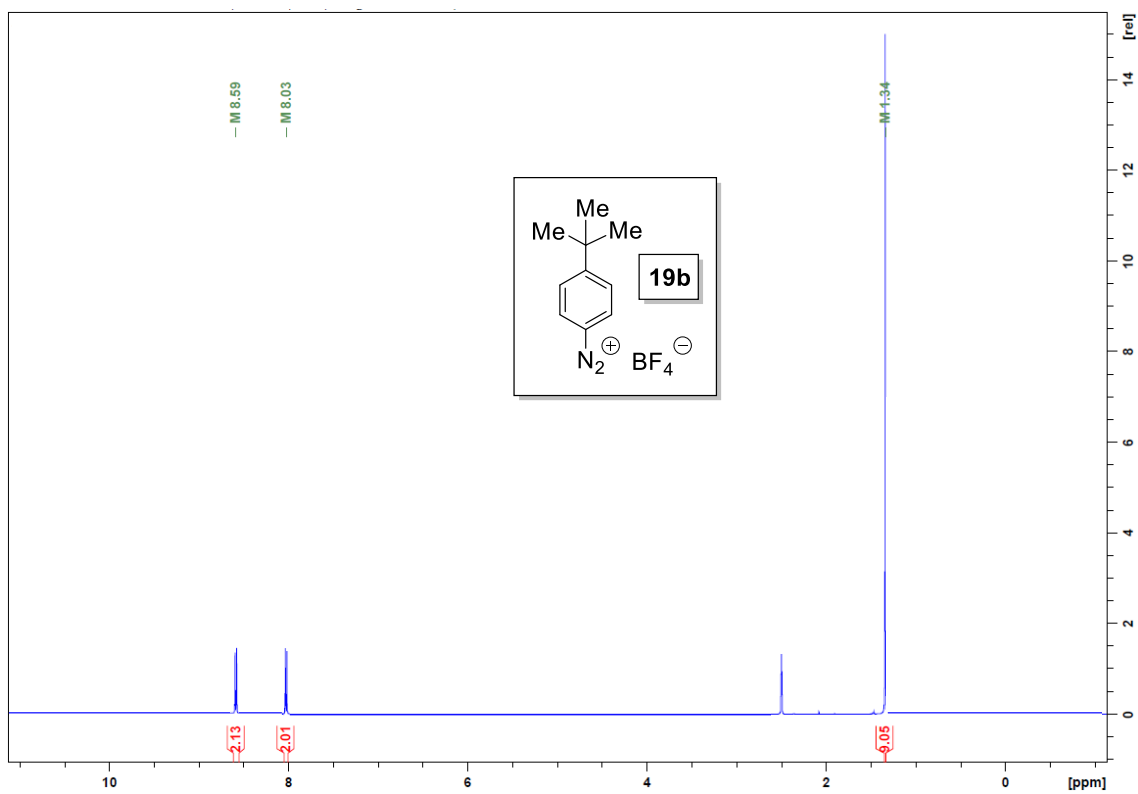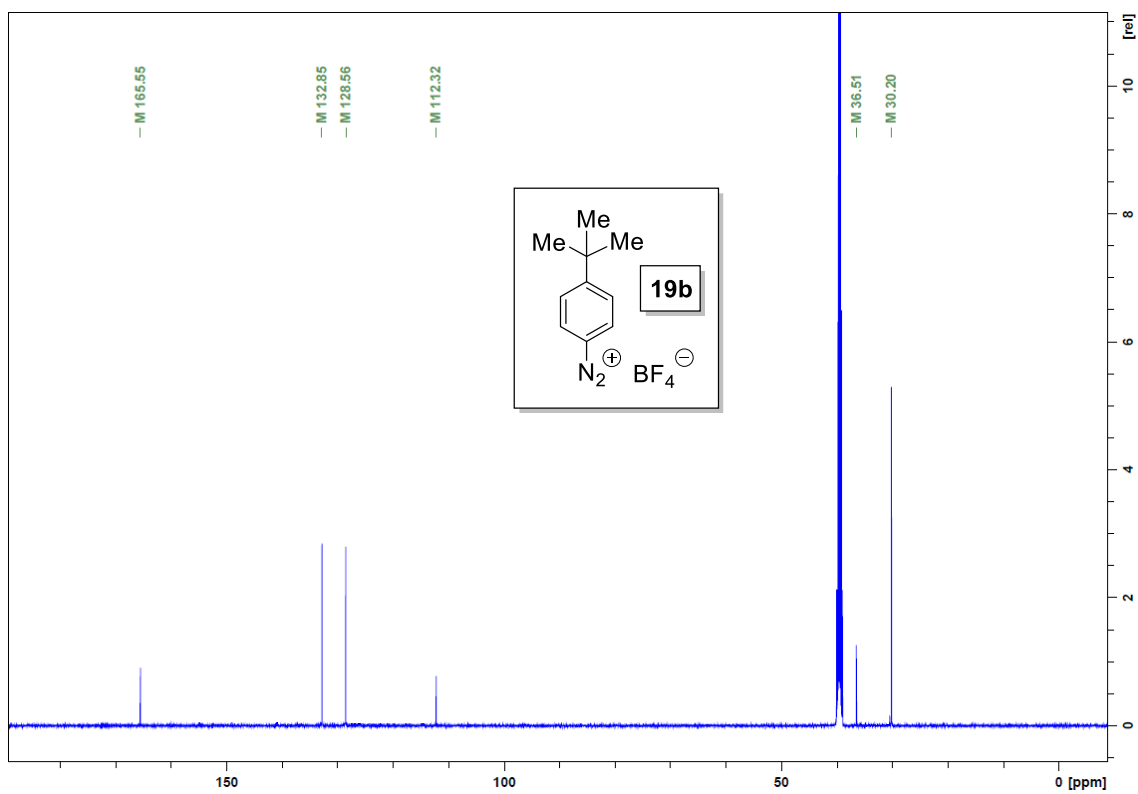

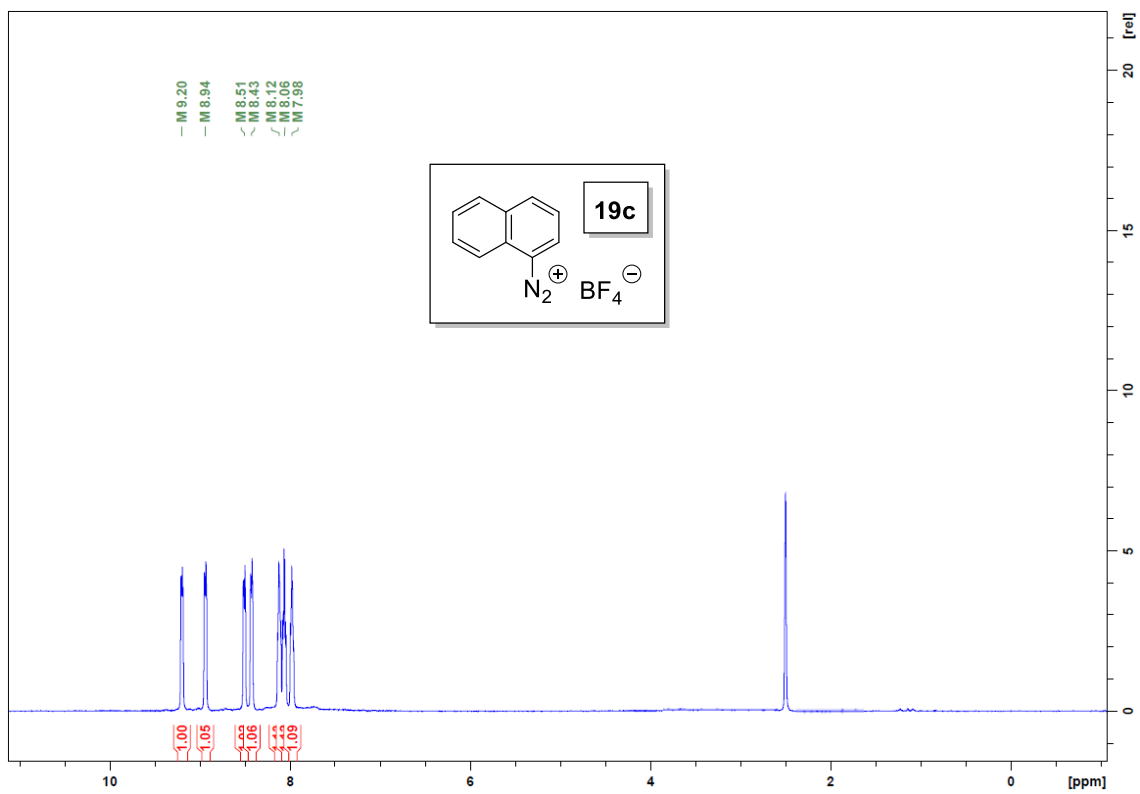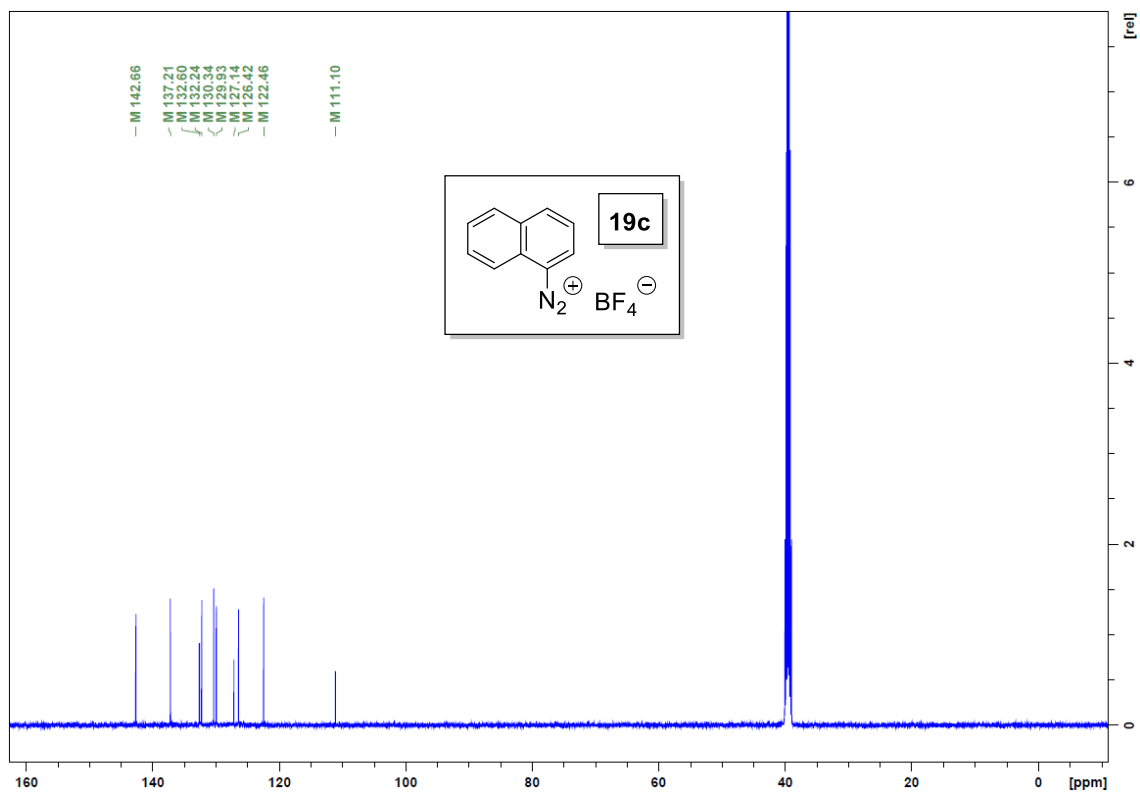

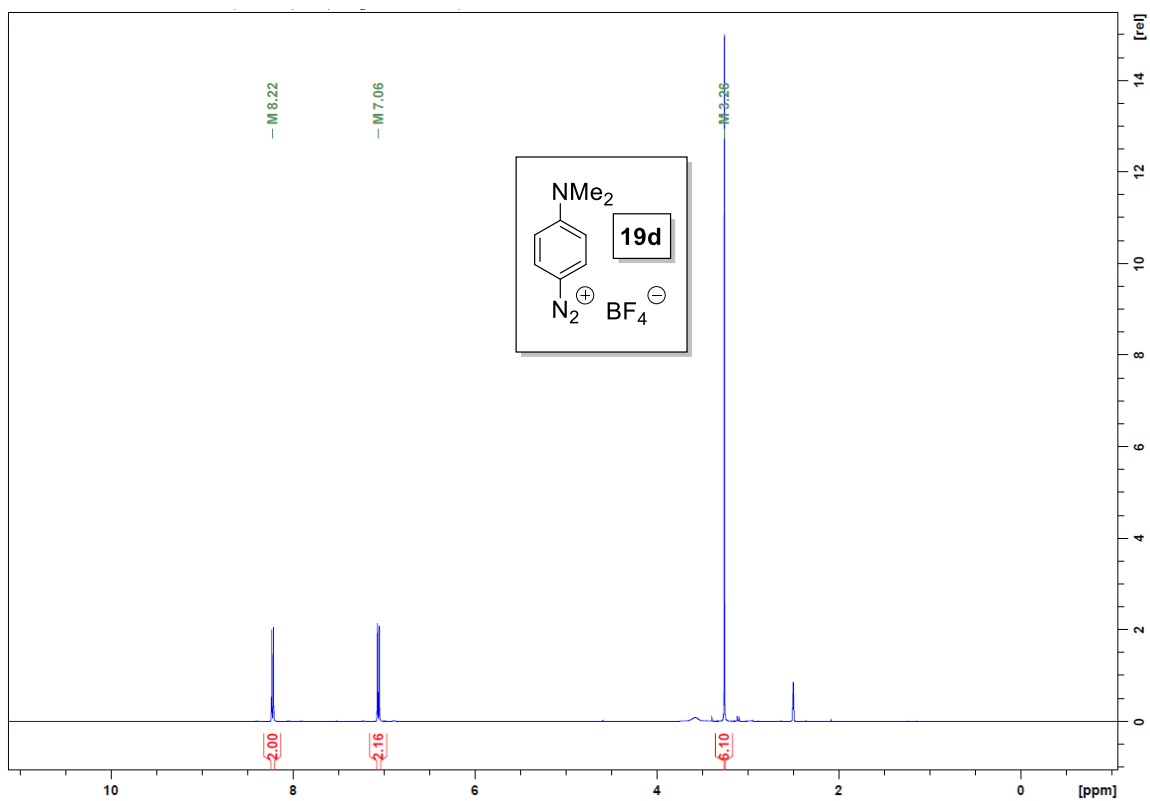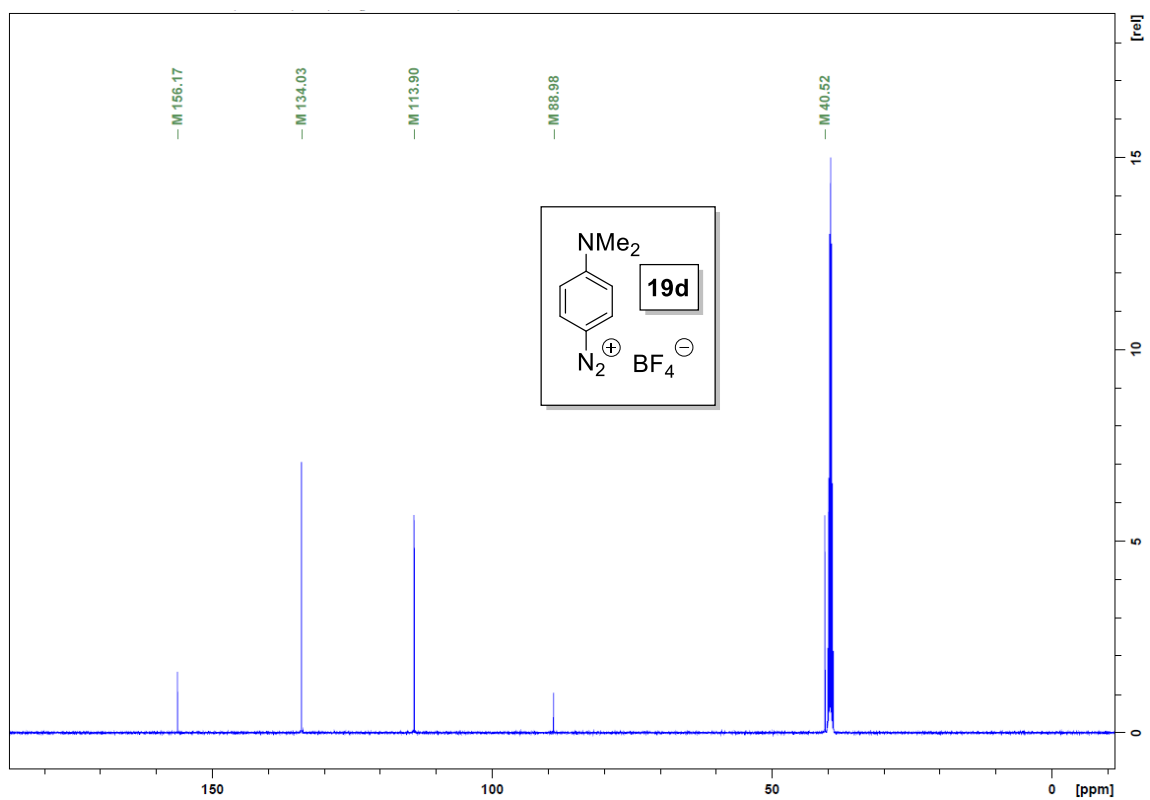



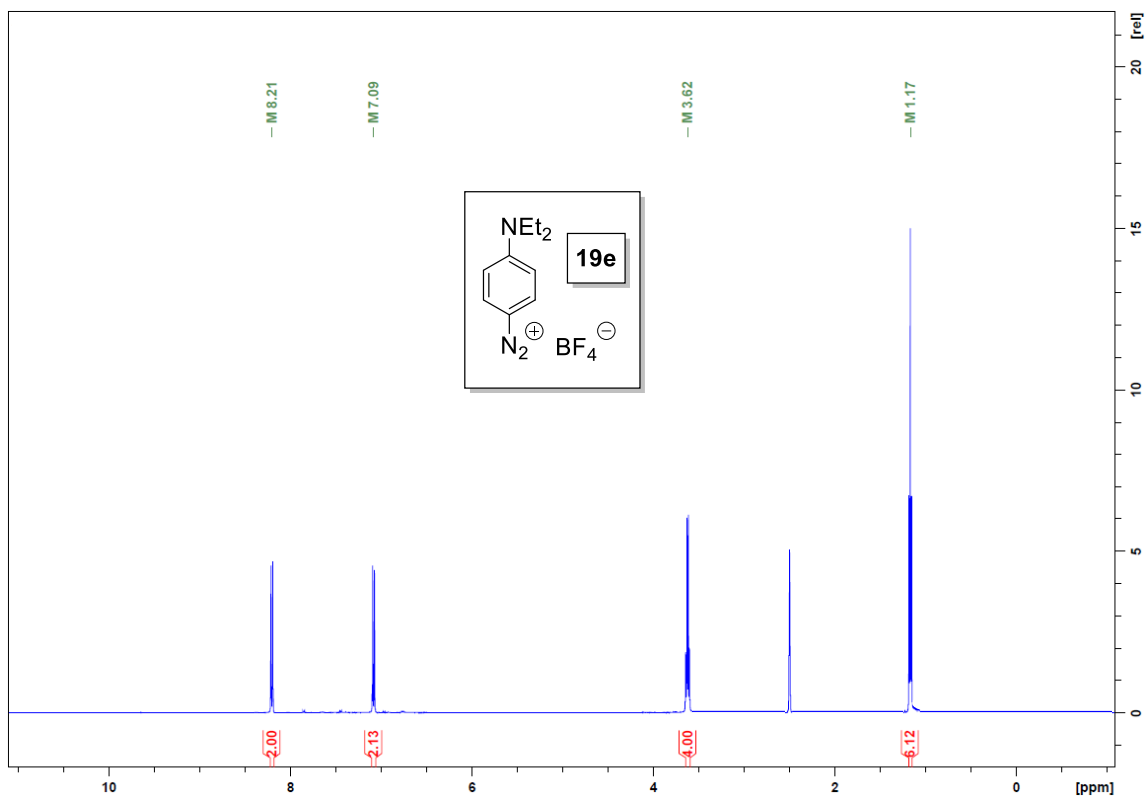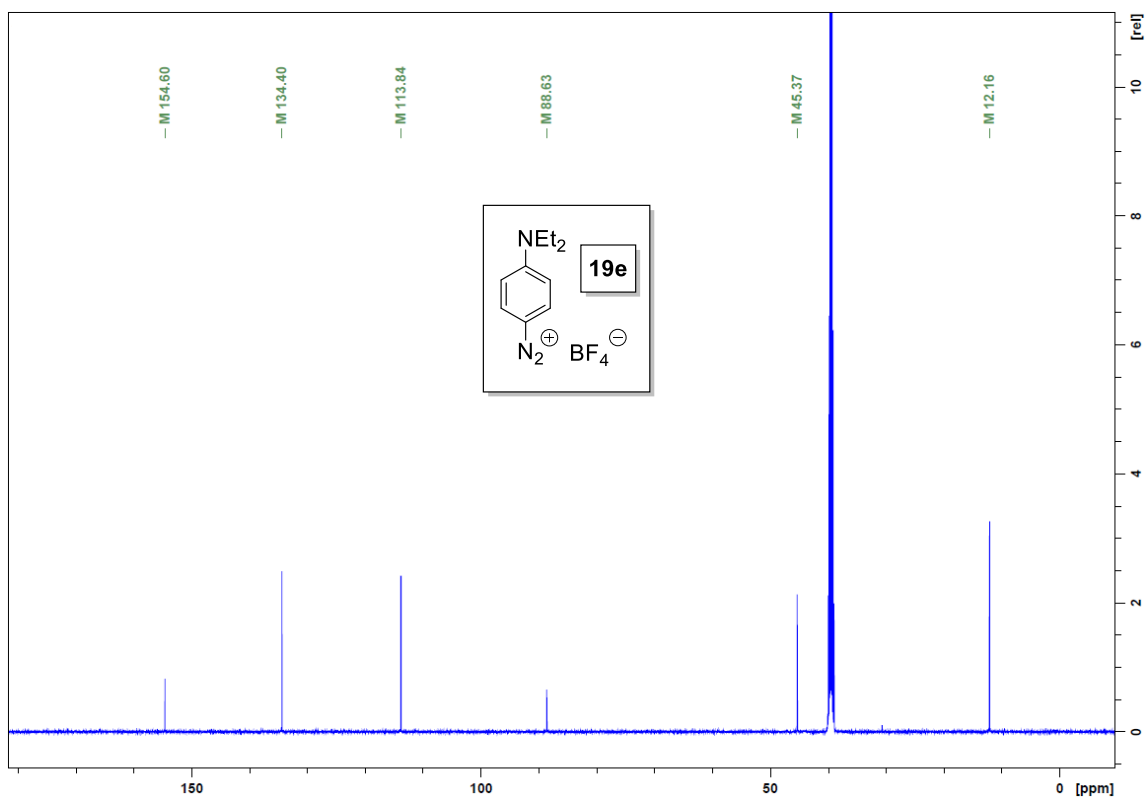

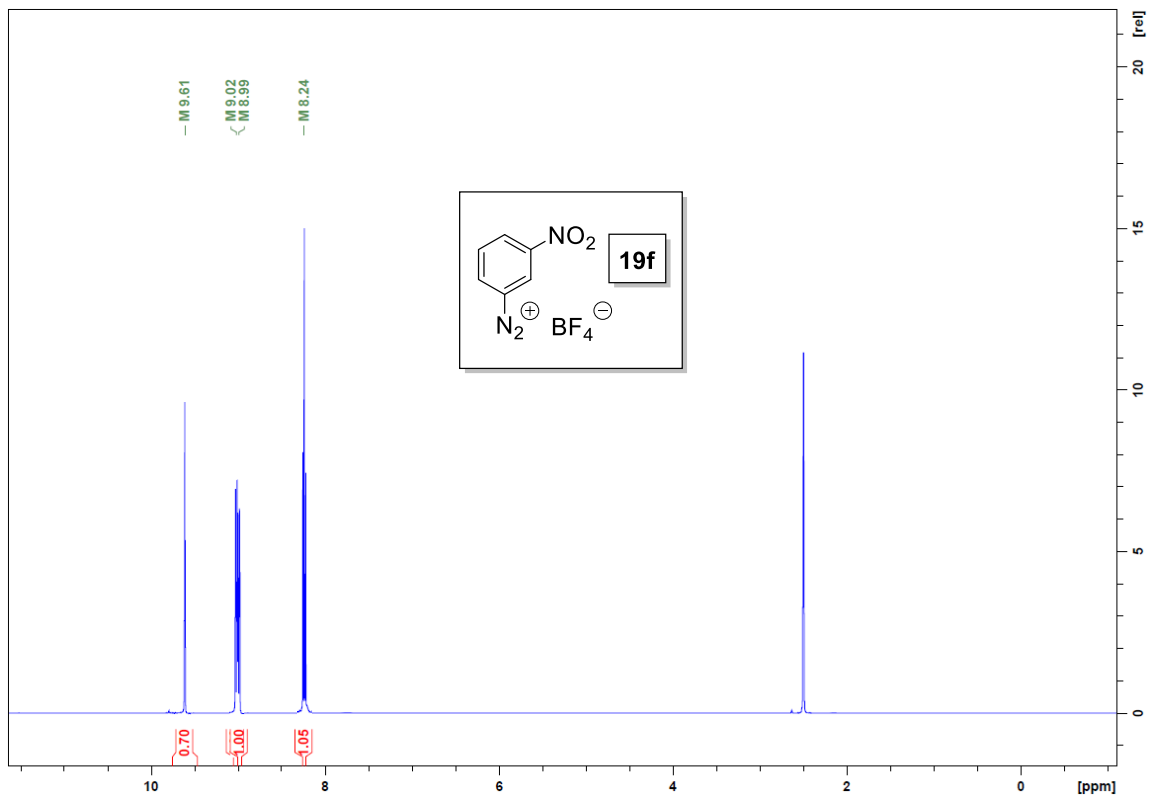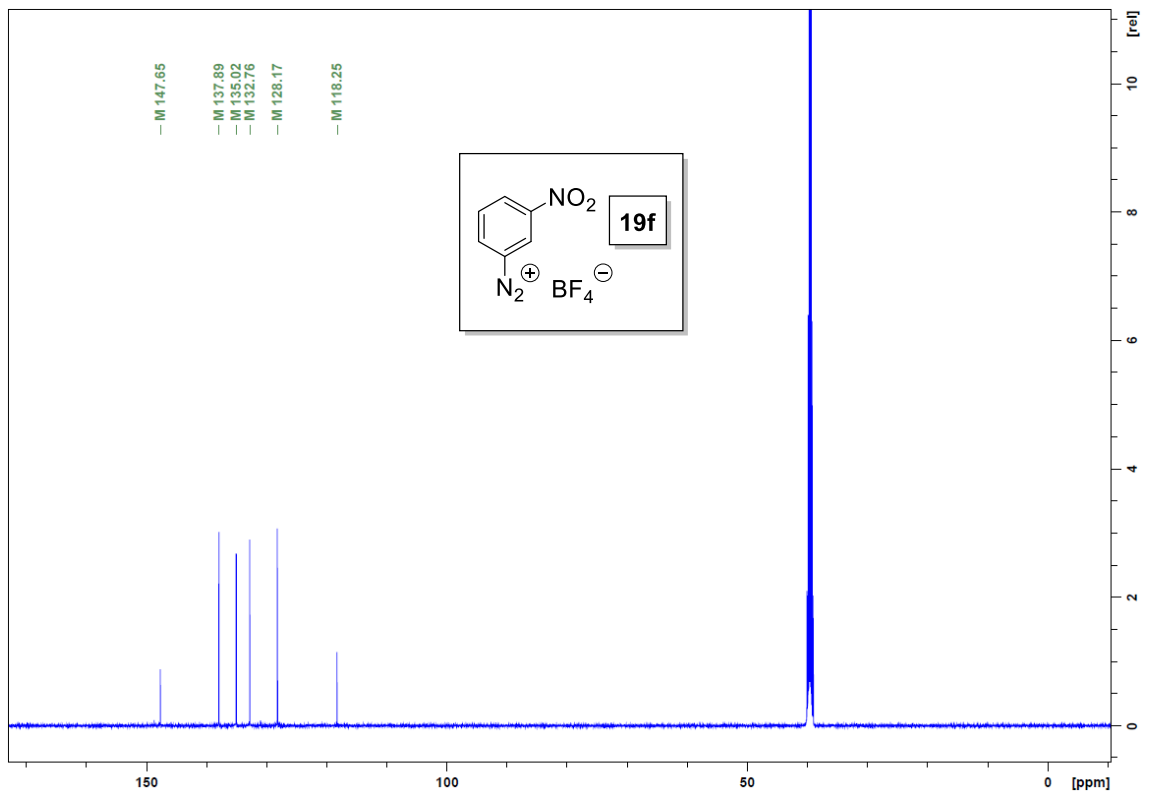

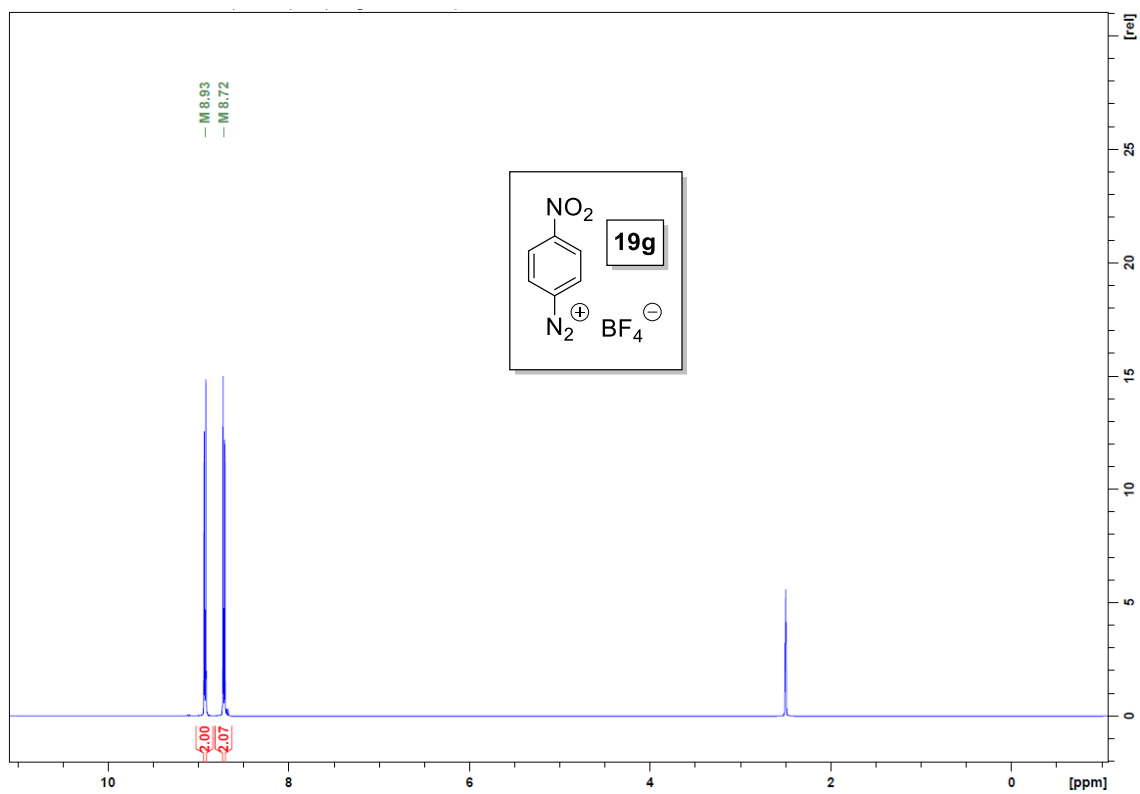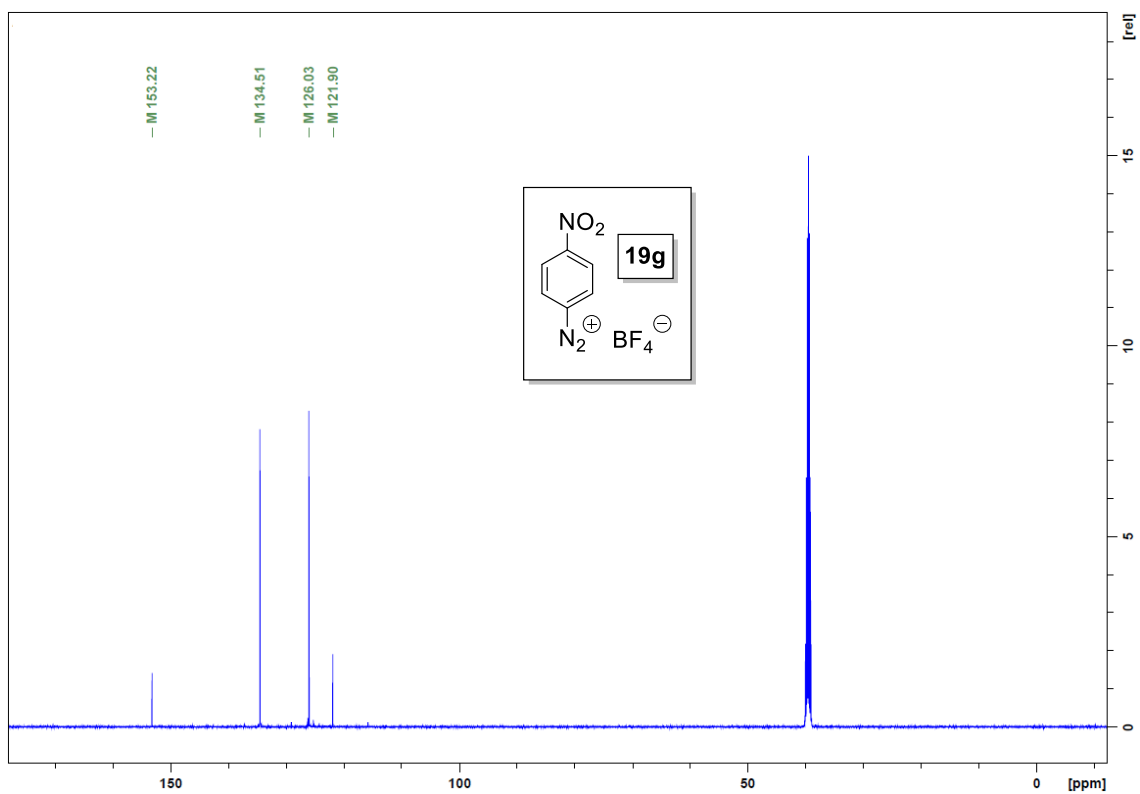

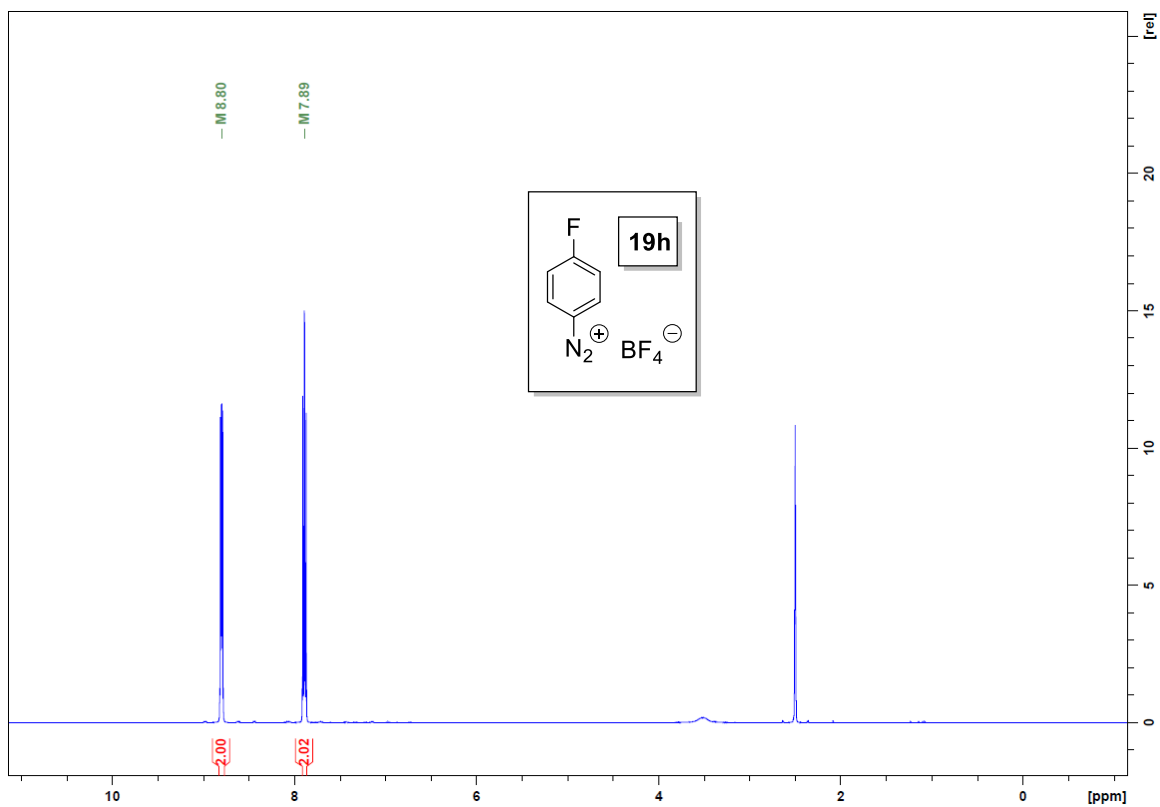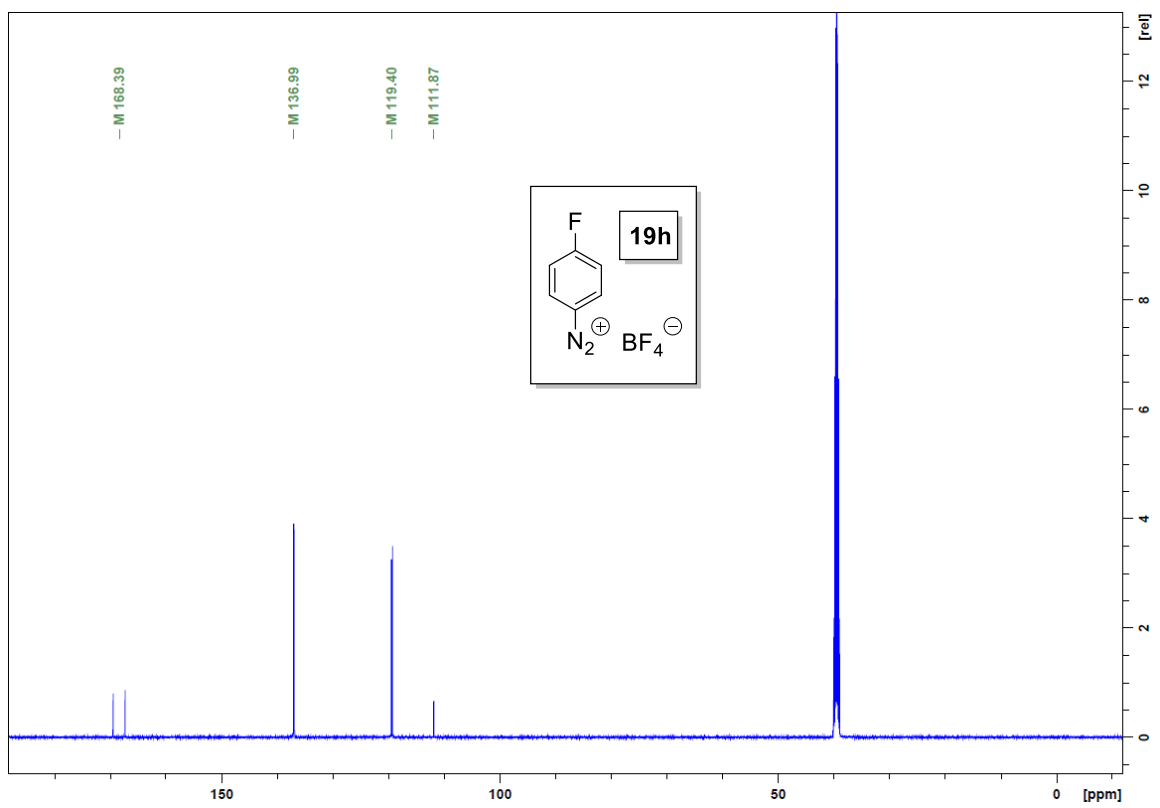

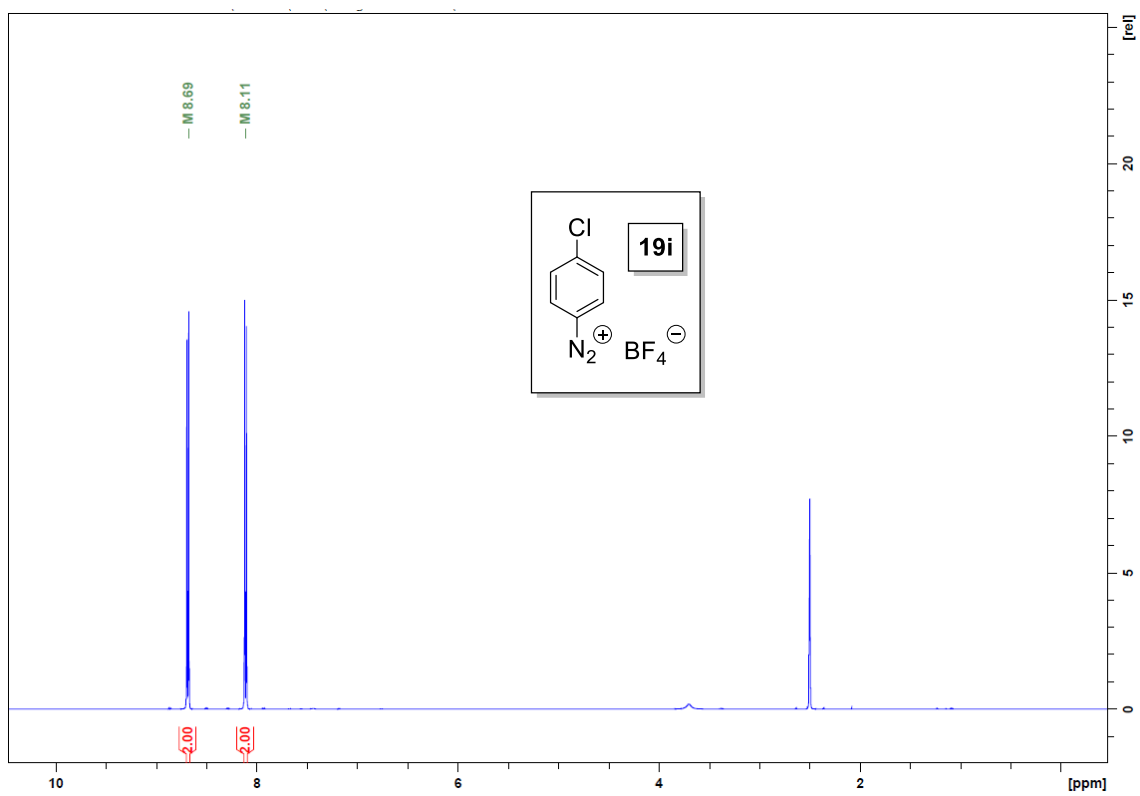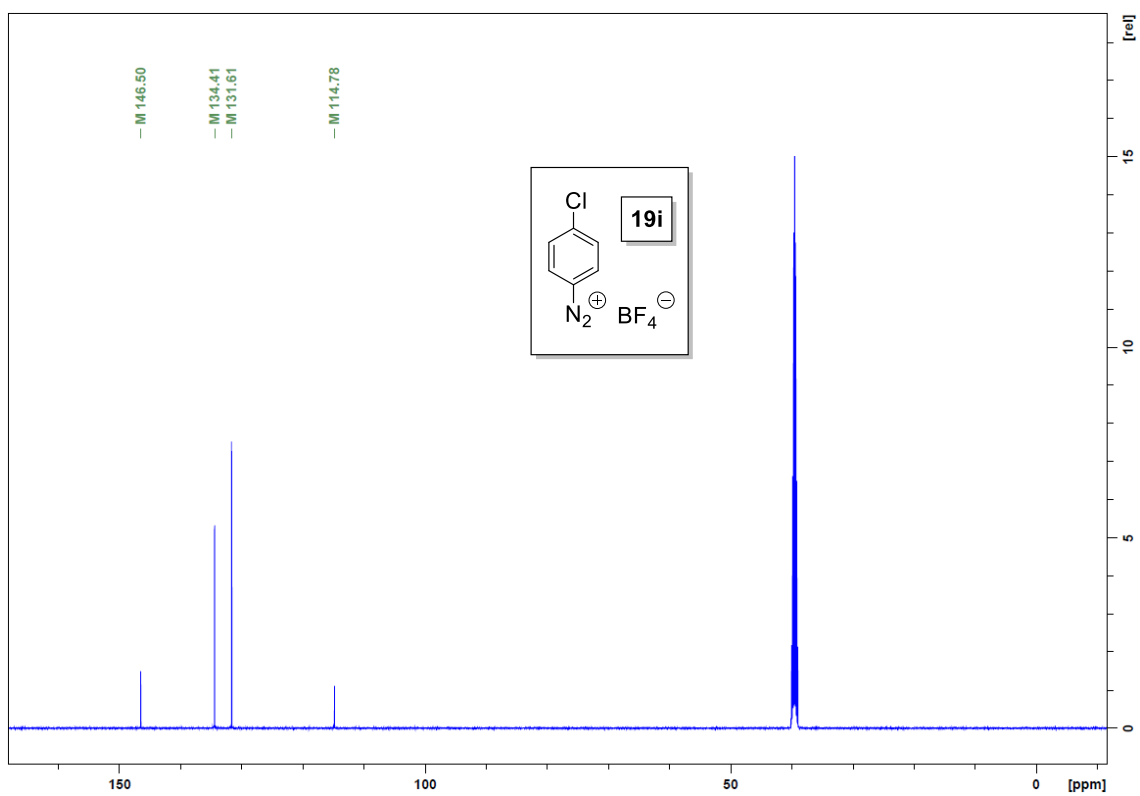

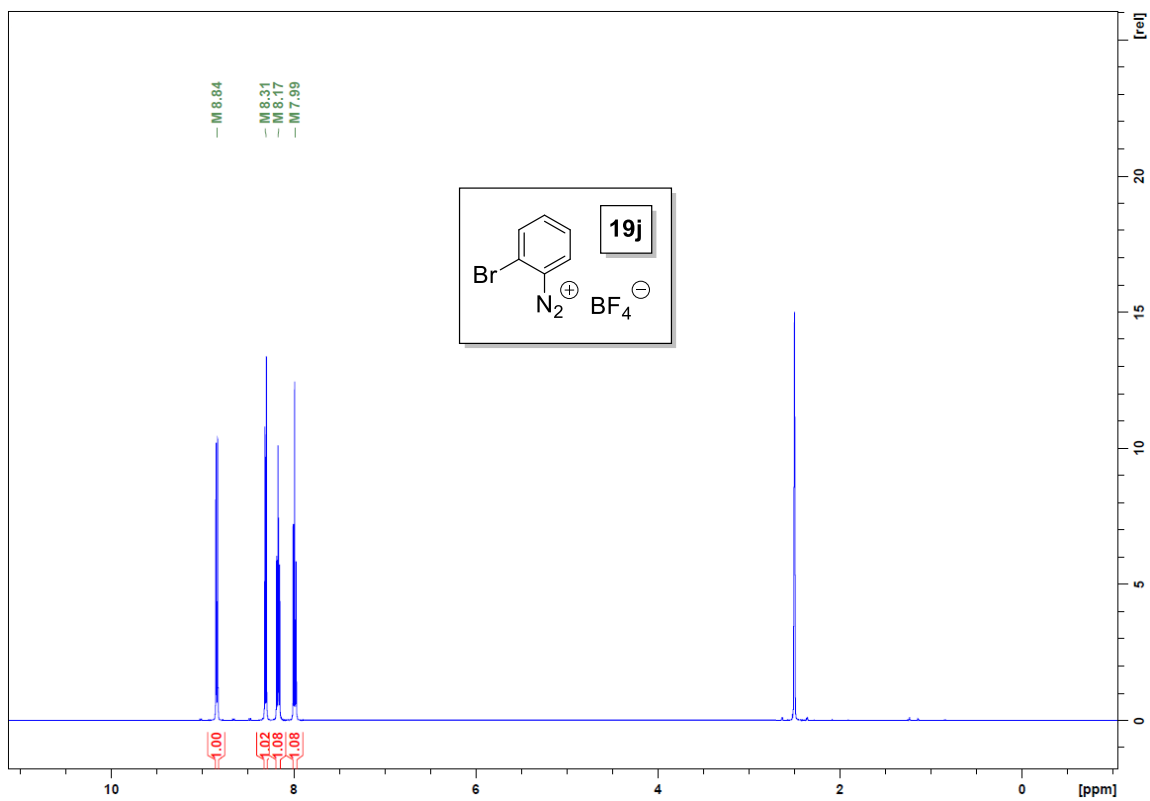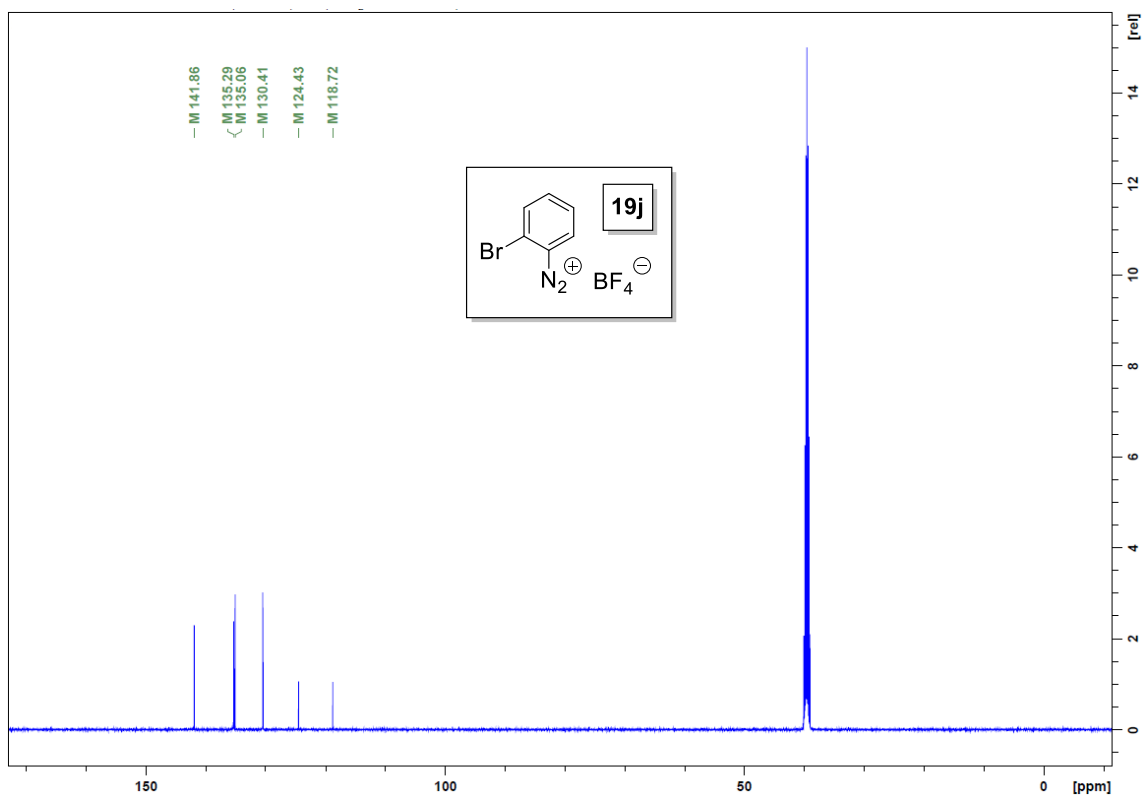

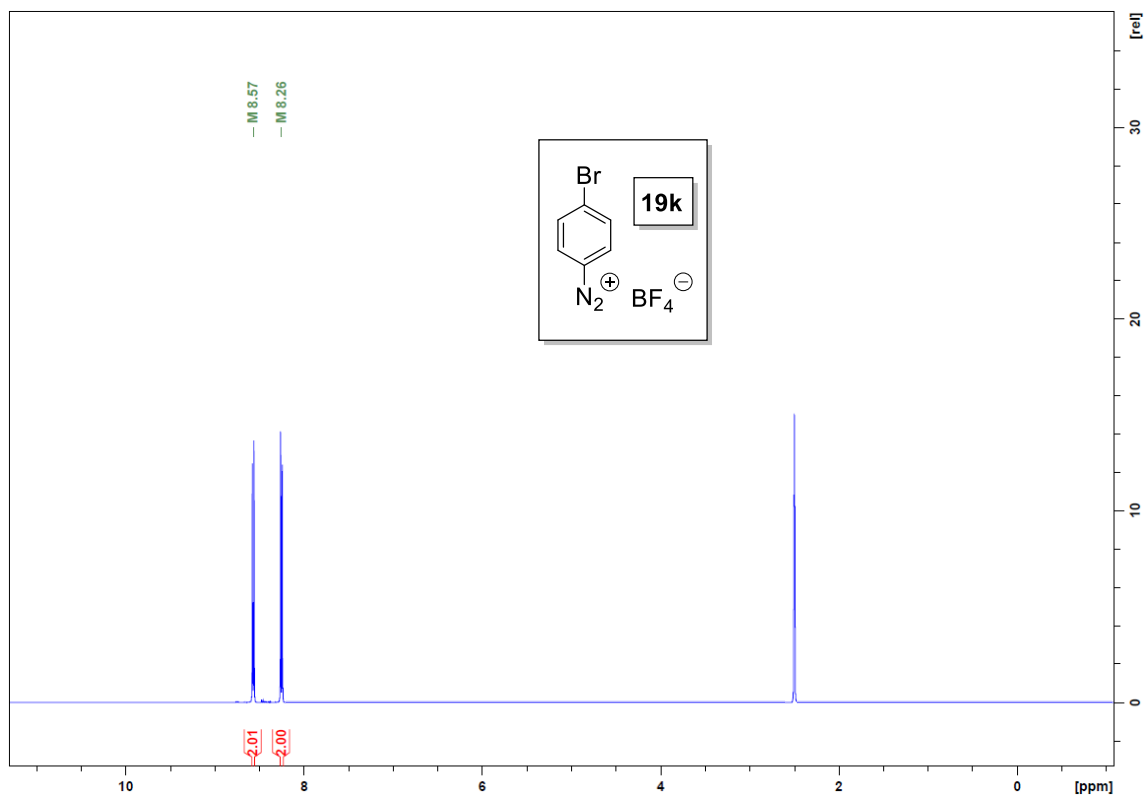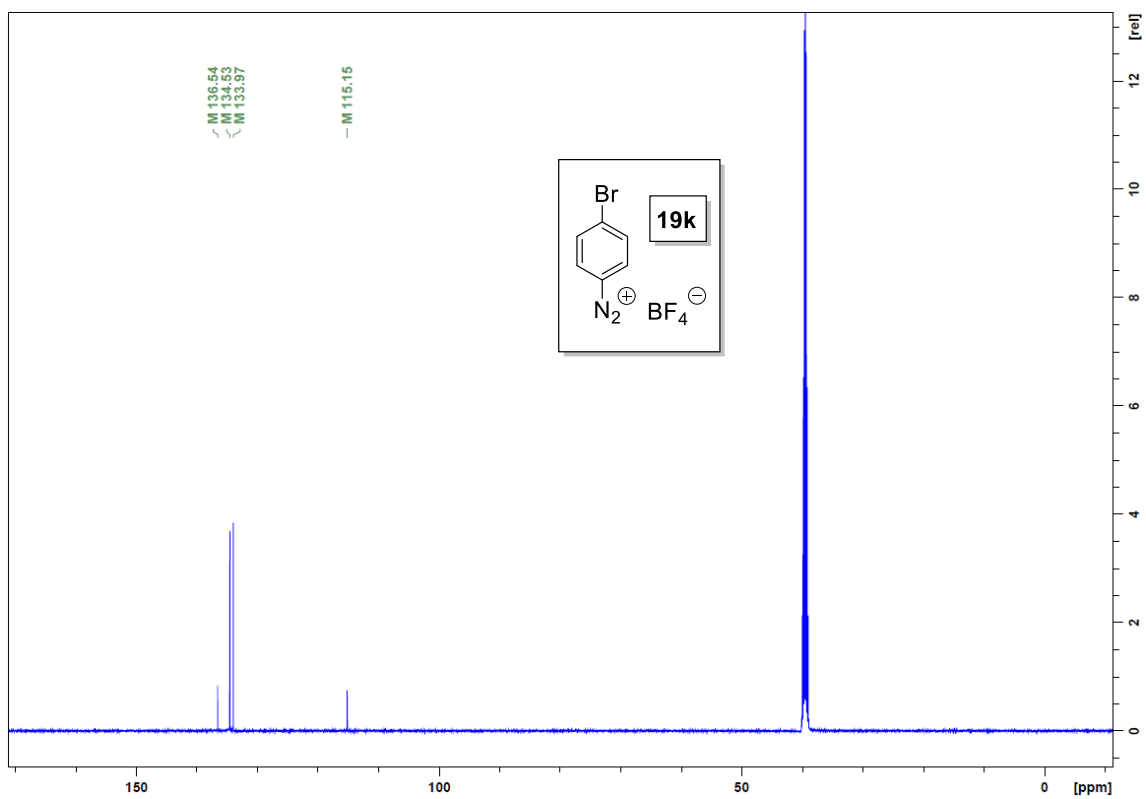

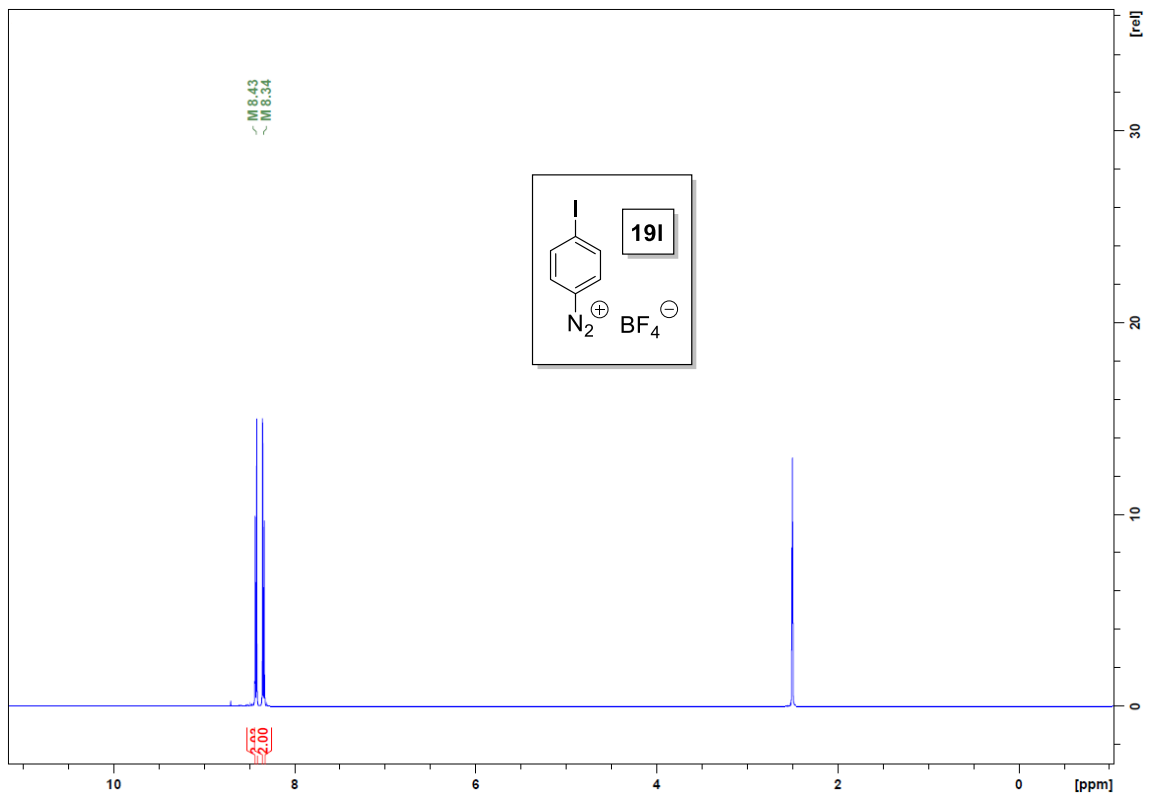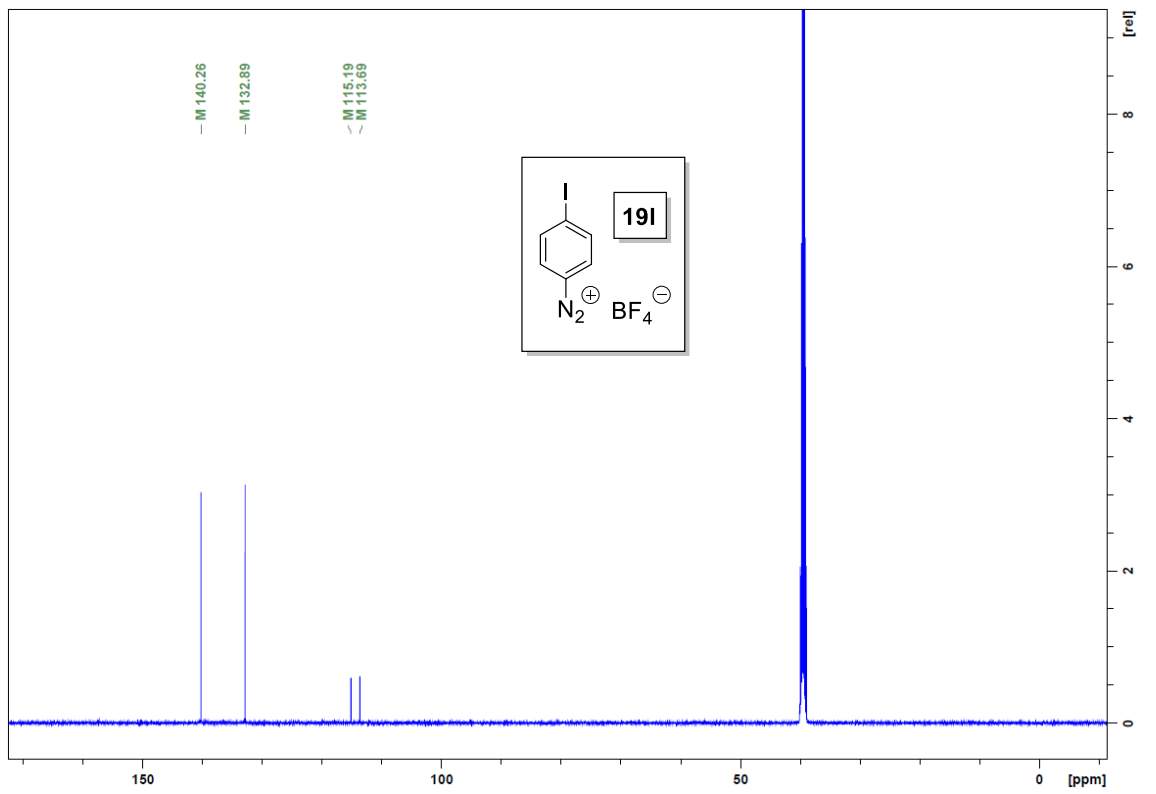



### III. Crystal Structures and Single-Crystal X-Ray Diffraction Data

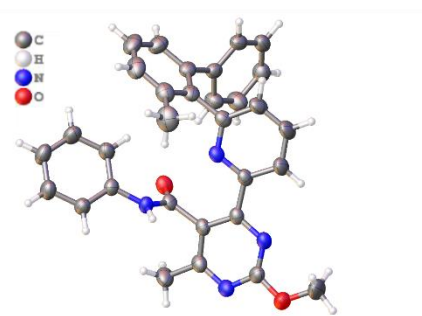

**Figure S1.** ORTEP drawing of compound **17b**. Thermal ellipsoids were drawn at 50% probability level.

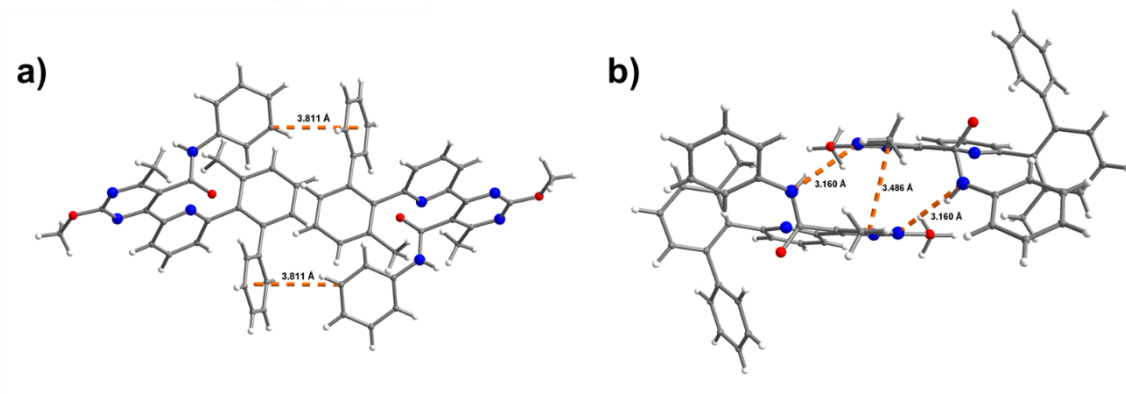

**Figure S2.** Intermolecular interactions of compound **17b**. Color code: C: grey; H: white; O: red; N: blue.

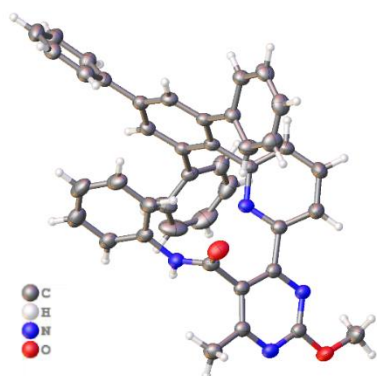

**Figure S3.** ORTEP drawing of compound **17d**. Thermal ellipsoids were drawn at 50% probability level.

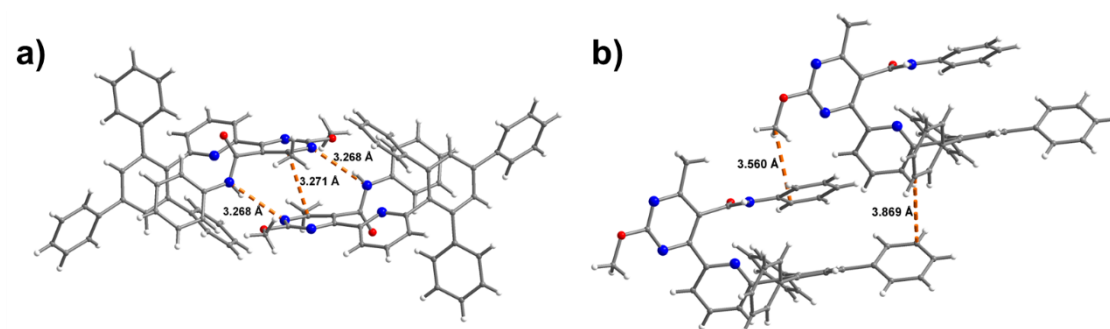

**Figure S4.** Intermolecular interactions of compound **17d**. Color code: C: grey; H: white; O: red; N: blue.

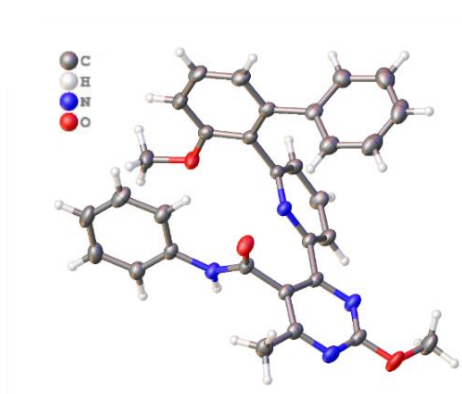

**Figure S5.** ORTEP drawing of compound **17f**. Thermal ellipsoids were drawn at 50% probability level.

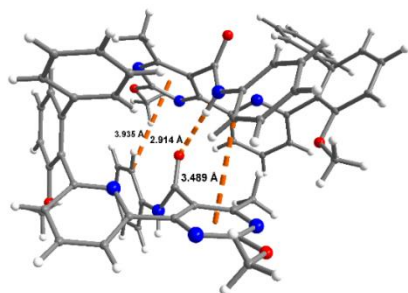

**Figure S6.** Intermolecular interactions of compound **17f**. Color code: C: grey; H: white; O: red; N: blue.

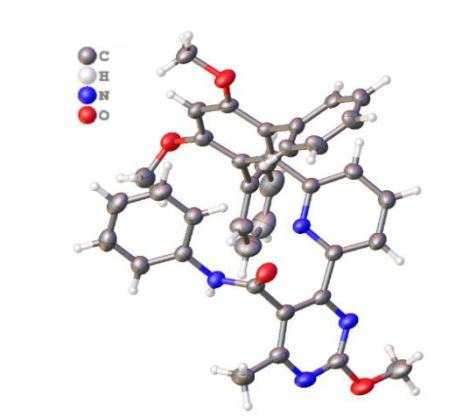

**Figure S7.** ORTEP drawing of compound **17h**. Thermal ellipsoids were drawn at 50% probability level.

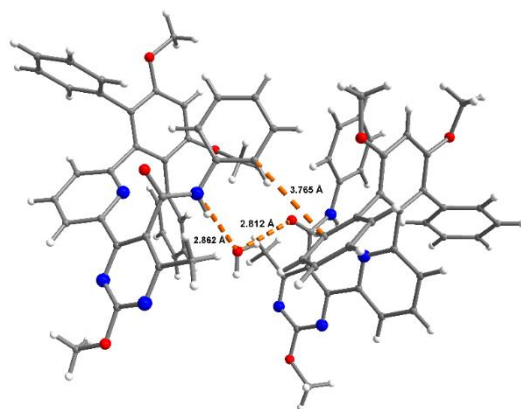

**Figure S8.** Intermolecular interactions of compound **17h**. Color code: C: grey; H: white; O: red; N: blue.

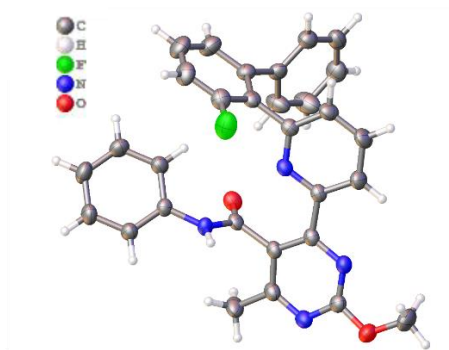

**Figure S9.** ORTEP drawing of compound **17j**. Thermal ellipsoids were drawn at 50% probability level.

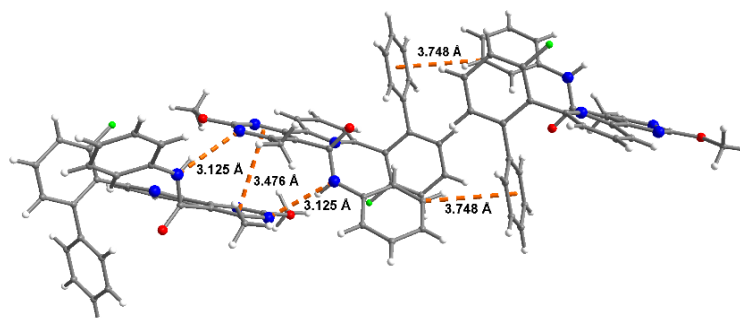

**Figure S10.** Intermolecular interactions of compound **17j**. Color code: C: grey; H: white; O: red; N: blue; F: light green.

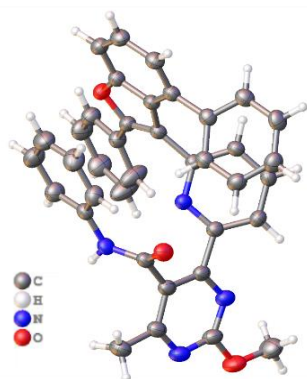

**Figure S11.** ORTEP drawing of compound **17r**. Thermal ellipsoids were drawn at 50% probability level.

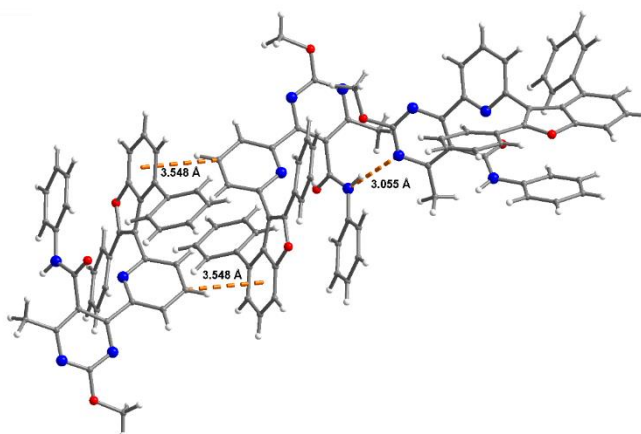

**Figure S12.** Intermolecular interactions of compound **17r**. Color code: C: grey; H: white; O: red; N: blue.

The asymmetric unit of **23** consists of two neutral molecules (corresponding to different conformers), where the Pd(II) centers adopt a distorted square planar coordination geometry. The coordination sphere of each Pd(II) consists of a tridentate N<sup>3</sup>C ligand and a terminally ligated Cl<sup>-</sup>. The maximum deviation from coordination planes is 0.03 Å (N3, N20, C33, Cl1) and 0.13 Å (N42, N58, C72, Cl2). The first conformer of **23** is nearly planar, where all 24 non-hydrogen atoms lie on the same plane, however a slight distortion is observed in the second conformer, which can be rationalized by taking into account the relatively high dihedral angle (~17°) between the planes of the benzofuryl moiety and the pyridylpyrimidine moiety. The tridentate ligand's bite angle in the two conformers is 158.3° and 158.5°.

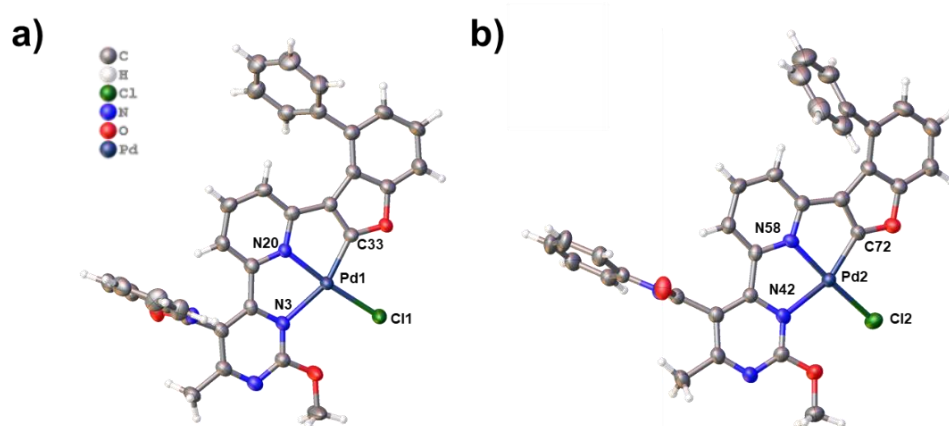

**Figure S13.** ORTEP drawings of the two conformations of Pd-complex **23** found in the crystal. Thermal ellipsoids were drawn at 50% probability level.

Complex **23** dimers in the asymmetric unit interact through N-H...Cl hydrogen bonds between the terminally ligated Cl<sup>-</sup> anion and the nitrogen atom of the amide group,  $\pi$ - $\pi$  stacking between the pyridine ring and the benzofuryl moiety, as well as CH- $\pi$  T-shaped packing between the benzoylamido group and the benzofuryl moiety.

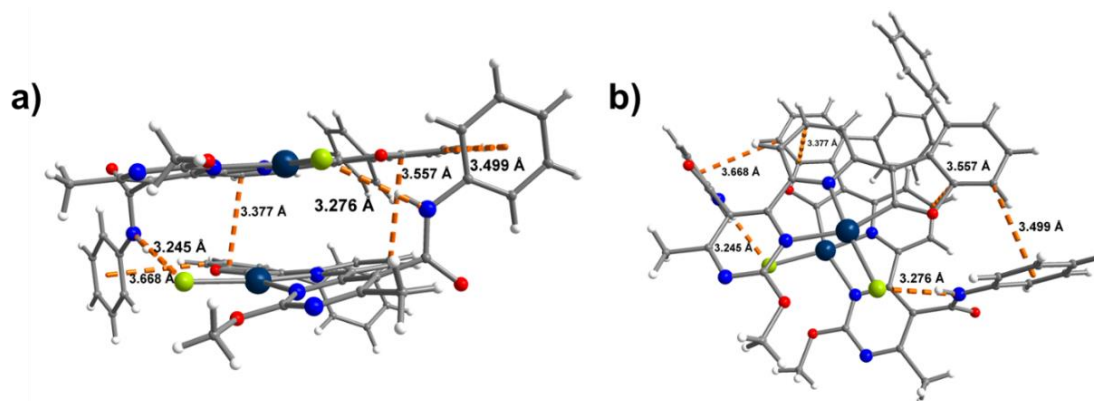

**Figure S14.** Intermolecular interactions of Pd-complex **23**: a) side view; b) top view. Color code: C: grey; H: white; O: red; N: blue; Cl: lime green; Pd: dark blue.

**Table S1.** Selected crystal data for compounds **17b**, **17d**, **17f**, **17h**, **17j**, **17r** and Pd-complex **23**.

| Identification code                       | <b>17b</b>                                                    | <b>17d.EtOAc<sup>a</sup></b>                                  | <b>17f.DCM<sup>a</sup></b>                                                    | <b>17h.½EtOAc.½H<sub>2</sub>O<sup>a</sup></b>                  | <b>17j</b>                                                     | <b>17r</b>                                                    | <b>23.½DCM<sup>a</sup></b>                                                                    |
|-------------------------------------------|---------------------------------------------------------------|---------------------------------------------------------------|-------------------------------------------------------------------------------|----------------------------------------------------------------|----------------------------------------------------------------|---------------------------------------------------------------|-----------------------------------------------------------------------------------------------|
| Empirical formula (cryst. unit)           | C <sub>31</sub> H <sub>26</sub> N <sub>4</sub> O <sub>2</sub> | C <sub>46</sub> H <sub>40</sub> N <sub>4</sub> O <sub>4</sub> | C <sub>32</sub> H <sub>28</sub> Cl <sub>2</sub> N <sub>4</sub> O <sub>3</sub> | C <sub>80</sub> H <sub>74</sub> N <sub>8</sub> O <sub>11</sub> | C <sub>30</sub> H <sub>23</sub> FN <sub>4</sub> O <sub>2</sub> | C <sub>38</sub> H <sub>28</sub> N <sub>4</sub> O <sub>3</sub> | C <sub>65</sub> H <sub>48</sub> Cl <sub>4</sub> N <sub>8</sub> O <sub>6</sub> Pd <sub>2</sub> |
| Formula weight (cryst. unit)              | 486.56                                                        | 712.82                                                        | 587.48                                                                        | 1323.47                                                        | 490.52                                                         | 588.64                                                        | 1391.71                                                                                       |
| Temperature (K)                           | 180(1)                                                        | 180(1)                                                        | 180(1)                                                                        | 180(1)                                                         | 180(1)                                                         | 150(1)                                                        | 150(1)                                                                                        |
| Crystal system                            | monoclinic                                                    | triclinic                                                     | monoclinic                                                                    | triclinic                                                      | monoclinic                                                     | monoclinic                                                    | monoclinic                                                                                    |
| Space group                               | C2/c                                                          | P $\bar{1}$                                                   | P21/n                                                                         | P $\bar{1}$                                                    | C2/c                                                           | P21/c                                                         | P21/c                                                                                         |
| a (Å)                                     | 30.8184(4)                                                    | 10.1753(2)                                                    | 14.20645(12)                                                                  | 11.6496(2)                                                     | 29.7627(4)                                                     | 10.57556(11)                                                  | 13.6930(3)                                                                                    |
| b (Å)                                     | 8.96166(12)                                                   | 10.8280(2)                                                    | 9.47536(7)                                                                    | 14.1847(2)                                                     | 9.05888(12)                                                    | 33.1193(3)                                                    | 26.2789(5)                                                                                    |
| c (Å)                                     | 18.6116(2)                                                    | 18.8802(3)                                                    | 21.65599(18)                                                                  | 22.6036(3)                                                     | 18.3792(2)                                                     | 9.47501(10)                                                   | 16.4539(4)                                                                                    |
| $\alpha$ , b, c (°)                       | 90, 94.552(2), 90                                             | 102.097(2), 99.993(2), 106.014(2)                             | 90, 91.450(1), 90                                                             | 105.402(1), 90.354(1), 107.050(2)                              | 90, 92.102(2), 90                                              | 90, 98.599(1), 90                                             | 90, 102.605(2), 90                                                                            |
| Volume (Å <sup>3</sup> )                  | 5124.01(12)                                                   | 1894.91(6)                                                    | 2914.21(4)                                                                    | 3428.40(10)                                                    | 4952.00(11)                                                    | 3281.37(6)                                                    | 5778.0(2)                                                                                     |
| Z                                         | 8                                                             | 2                                                             | 4                                                                             | 2                                                              | 8                                                              | 4                                                             | 4                                                                                             |
| $\rho_{\text{calc}}/\text{cm}^3$          | 1.261                                                         | 1                                                             | 1.339                                                                         | 1.282                                                          | 1.316                                                          | 1.192                                                         | 1.600                                                                                         |
| $\mu/\text{mm}^{-1}$                      | 0.641                                                         | 0.641                                                         | 2.331                                                                         | 0.698                                                          | 0.729                                                          | 0.614                                                         | 7.230                                                                                         |
| F(000)                                    | 2048.0                                                        | 752                                                           | 1224.0                                                                        | 1396.0                                                         | 2048.0                                                         | 1232.0                                                        | 2808.0                                                                                        |
| Reflections collected                     | 27427                                                         | 22574                                                         | 40637                                                                         | 42543                                                          | 29030                                                          | 23004                                                         | 39464                                                                                         |
| Independent reflections                   | 4572 [R <sub>int</sub> = 0.0355, R <sub>sigma</sub> = 0.0261] | 6736 [R <sub>int</sub> = 0.0266, R <sub>sigma</sub> = 0.0287] | 5191 [R <sub>int</sub> = 0.0371, R <sub>sigma</sub> = 0.0226]                 | 12203 [R <sub>int</sub> = 0.0262, R <sub>sigma</sub> = 0.0273] | 4412 [R <sub>int</sub> = 0.0350, R <sub>sigma</sub> = 0.0233]  | 5857 [R <sub>int</sub> = 0.0333, R <sub>sigma</sub> = 0.0303] | 10285 [R <sub>int</sub> = 0.0788, R <sub>sigma</sub> = 0.0744]                                |
| Data/restraints/parameters                | 4572/0/337                                                    | 6736/146/547                                                  | 5191/0/373                                                                    | 12203/91/996                                                   | 4412/0/336                                                     | 5857/0/408                                                    | 10285/55/780                                                                                  |
| Goodness-of-fit on F <sup>2</sup>         | 1.049                                                         | 1                                                             | 1.044                                                                         | 1.060                                                          | 1.051                                                          | 1.031                                                         | 1.053                                                                                         |
| Final R index values [I > 2 $\sigma$ (I)] | R <sub>1</sub> = 0.0373, wR <sub>2</sub> = 0.0982             | R <sub>1</sub> = 0.0375, wR <sub>2</sub> = 0.1013             | R <sub>1</sub> = 0.0568, wR <sub>2</sub> = 0.1529                             | R <sub>1</sub> = 0.0392, wR <sub>2</sub> = 0.1030              | R <sub>1</sub> = 0.0334, wR <sub>2</sub> = 0.0892              | R <sub>1</sub> = 0.0443, wR <sub>2</sub> = 0.1296             | R <sub>1</sub> = 0.0549, wR <sub>2</sub> = 0.1371                                             |
| Final R index values [all data]           | R <sub>1</sub> = 0.0443, wR <sub>2</sub> = 0.1017             | R <sub>1</sub> = 0.0427, wR <sub>2</sub> = 0.1044             | R <sub>1</sub> = 0.0588, wR <sub>2</sub> = 0.1545                             | R <sub>1</sub> = 0.0437, wR <sub>2</sub> = 0.1058              | R <sub>1</sub> = 0.0375, wR <sub>2</sub> = 0.0916              | R <sub>1</sub> = 0.0475, wR <sub>2</sub> = 0.1324             | R <sub>1</sub> = 0.0762, wR <sub>2</sub> = 0.1477                                             |

<sup>a</sup>R =  $\sum ||F_o| - |F_c|| / \sum |F_o|$ , wR =  $\{\sum [w(|F_o|^2 - |F_c|^2)^2] / \sum [w(|F_o|^4)]\}^{1/2}$  and <sup>b</sup>w =  $1/[\sigma^2(F_o^2) + (mP)^2 + nP]$  where  $P = (F_o^2 + 2F_c^2)/3$  and m and n are constants. [<sup>a</sup>Solvents co-crystallizing with the compounds.]
